# Supplementary material for: A benchmark dataset of herbarium specimen images with label data
Source: Biodivers Data J. 2019 Feb 8;(7):e31817. doi: 10.3897/BDJ.7.e31817 (PMC6396854; doi:10.3897/BDJ.7.e31817)
Supplement: Supplementary material 5 — Table of specimen data, DOIs and URIs [file bdj-07-e31817-s005.csv]

basisOfRecord	scientificName	taxonRank	countryCode	occurrenceID	catalogNumber	genus	specificEpithet	country	year	eventDate	locality	recordedBy	infraspecificEpithet	decimalLatitude	decimalLongitude	geodeticDatum	setID	verbatimEventDate	typeStatus	stateProvince	identifiedBy	dateIdentified	continent	identifier	month	day	county	modified	recordNumber	habitat	eventRemarks	coordinateUncertaintyInMeters	identificationRemarks	verbatimElevation	otherCatalogNumbers	collectionID	rightsHolder	verbatimLocality	datasetID	verbatimCoordinates	scientificNameAuthorship	kingdom	phylum	order	family	class	collectionCode	nomenclaturalCode	higherClassification
PRESERVED_SPECIMEN	Abelia forrestii (Diels) W.W.Sm.	SPECIES	CN	http://data.rbge.org.uk/herb/E00633257	E00633257	Abelia	forrestii	China									E							http://data.rbge.org.uk/herb/E00633257				2013-01-08							BGBASE:645427	http://biocol.org/urn:lsid:biocol.org:col:15670						Plantae	Tracheophyta	Dipsacales	Caprifoliaceae	Magnoliopsida	E	ICBN
PRESERVED_SPECIMEN	Abelia R.Br.	GENUS	CN	http://data.rbge.org.uk/herb/E00289691	E00289691	Abelia		China	2006	2006-05-29	Danzha Cun. In the vicinity of Zhaobitan forest farm, ca. 26.5 direct km NNW of Houqiao (Guyong).	Gaoligong Shan Biotic Survey Expedition - Summer 2006		25.543333	98.222222	WGS84	E	2006-05-29		Yunnan				http://data.rbge.org.uk/herb/E00289691	5	29	Tengchong	2008-11-05	30809					2630 M	BGBASE:299189	http://biocol.org/urn:lsid:biocol.org:col:15670						Plantae	Tracheophyta	Dipsacales	Caprifoliaceae	Magnoliopsida	E	ICBN
PRESERVED_SPECIMEN	Abelia uniflora R.Br.	SPECIES	CN	http://data.rbge.org.uk/herb/E00065282	E00065282	Abelia	uniflora	China				Maire, E.E.					E							http://data.rbge.org.uk/herb/E00065282				1998-07-14							BGBASE:70338	http://biocol.org/urn:lsid:biocol.org:col:15670						Plantae	Tracheophyta	Dipsacales	Caprifoliaceae	Magnoliopsida	E	ICBN
PRESERVED_SPECIMEN	Abies grandis Lindl.	SPECIES	BE	http://www.botanicalcollections.be/specimen/BR0000012558803	BR0000012558803	Abies	grandis	Belgium	2009	2009-03-29	Torhout, Groenhovebos, IFBL D1.18.32	Verloove F.					BR	29.03.2009						http://www.botanicalcollections.be/specimen/BR0000012558803	3	29		2011-07-15	7527								Meise Botanic Garden					Plantae	Tracheophyta	Pinales	Pinaceae	Pinopsida		ICBN
PRESERVED_SPECIMEN	Abolboda acaulis var. acaulis	VARIETY	GY	http://specimens.kew.org/herbarium/K000587145	K000587145	Abolboda	acaulis	Guyana	1944	1944-04-30	Plants of the Kaieteur Plateau	Maguire, B.; Fanshawe, D.B.	acaulis				K		ISOTYPE		Kral, R.			K000587145	4	30		2009-04-28	23096	in white sand from conglomerate and sandstone	Locally frequent; perennial tufted herb 2--3 cm. high; rootstck fleshy; 1--2 flowered, flowers pale blue;											Plantae	Tracheophyta	Poales	Xyridaceae	Liliopsida	Herbarium		XYRIDACEAE
PRESERVED_SPECIMEN	Acacia intricata S.Moore	SPECIES	AU	333757c3-081a-478e-803d-6b2674a42754	BM000796649	Acacia	intricata	Australia	1916	1916-01-01		Frederick Stoward					BM		HOLOTYPE	Western Australia	B R. Maslin		OCEANIA	4989714				2017-10-19	756						NHMUK:ecatalogue:4989714							Plantae	Tracheophyta	Fabales	Fabaceae	Magnoliopsida	BOT		Leguminosae
PRESERVED_SPECIMEN	Acacia johannis Pedley	SPECIES	AU	http://specimens.kew.org/herbarium/K000821274	K000821274	Acacia	johannis	Australia	1990	1990-04-13	Cook District; Mount Mulligan	Clarkson, J.R.		-16.9	144.85	WGS84	K		ISOTYPE					K000821274	4	13		2012-05-02	8217	Along small stream on southern end of the mountain.	A shrub 3m tall. Bark smooth, dark grey. Flowers yellow.	0.2										Plantae	Tracheophyta	Fabales	Fabaceae	Magnoliopsida	Herbarium		LEGUMINOSAE-MIMOSOIDEAE
PRESERVED_SPECIMEN	Acaena pinnatifida Ruiz & Pav.	SPECIES	CL	http://coldb.mnhn.fr/catalognumber/mnhn/p/p01819267	P01819267	Acaena	pinnatifida	Chile				Dombey					P		SYNTYPE					http://coldb.mnhn.fr/catalognumber/mnhn/p/p01819267				2015-11-06										in arenosis Chili				Plantae	Tracheophyta	Rosales	Rosaceae	Magnoliopsida	P
PRESERVED_SPECIMEN	Acalypha lanceolata Willd.	SPECIES	ID	http://data.biodiversitydata.nl/naturalis/specimen/L.2180891	L.2180891	Acalypha	lanceolata	Indonesia	1949	1949-12-08	Bogor Botanical Garden	Kern JH					L	1949/12/08		Java			ASIA	L.2180891	12	8																Plantae	Tracheophyta	Malpighiales	Euphorbiaceae	Magnoliopsida	Botany	ICN	Plantae|Magnoliopsidae|Malpighiales|Euphorbiaceae
PRESERVED_SPECIMEN	Acalypha monostachya Cav.	SPECIES	US	http://www.botanicalcollections.be/specimen/BR0000013309459	BR0000013309459	Acalypha	monostachya	United States			S.L.	Lindheimer F.J.					BR	S.D.						http://www.botanicalcollections.be/specimen/BR0000013309459				2012-10-02	690								Meise Botanic Garden					Plantae	Tracheophyta	Malpighiales	Euphorbiaceae	Magnoliopsida		ICBN
PRESERVED_SPECIMEN	Acanthospermum australe Kuntze	SPECIES	BR	http://specimens.kew.org/herbarium/K001031711	K001031711	Acanthospermum	australe	Brazil	1962	1962-07-23	Road to Amapa, km 134, Agua Azul.	Pires, J.M.					K							K001031711	7	23		2015-05-28	52249													Plantae	Tracheophyta	Asterales	Asteraceae	Magnoliopsida	Herbarium		COMPOSITAE
PRESERVED_SPECIMEN	Acanthus kulalensis Vollesen	SPECIES	KE	http://www.botanicalcollections.be/specimen/BR0000009519527	BR0000009519527	Acanthus	kulalensis	Kenya	2004	2004-12-26		Luke W.R.Q. & Luke P.A.					BR		ISOTYPE					http://www.botanicalcollections.be/specimen/BR0000009519527	12	26		2009-06-10	10818								Meise Botanic Garden					Plantae	Tracheophyta	Lamiales	Acanthaceae	Magnoliopsida		ICBN
PRESERVED_SPECIMEN	Acer buergerianum Miq.	SPECIES	JP	http://data.biodiversitydata.nl/naturalis/specimen/L%20%200329805	L 0329805	Acer	buergerianum	Japan			Japonia.	Siebold PF von					L		LECTOTYPE		Murray E	1965-08-01T00:00:00.000+0000	ASIA	L 0329805																		Plantae	Tracheophyta	Sapindales	Sapindaceae	Magnoliopsida	Botany	ICN	Plantae|Magnoliopsidae|Sapindales|Aceraceae
PRESERVED_SPECIMEN	Acer davidii subsp. grosseri (Pax) P.C.de Jong	SUBSPECIES	CN	http://data.rbge.org.uk/herb/E00144488	E00144488	Acer	davidii	China			Daba Shan	Sichuan Expedition (1994)	grosseri				E			Sichuan				http://data.rbge.org.uk/herb/E00144488				2001-12-04	1788					1270 M	BGBASE:146539	http://biocol.org/urn:lsid:biocol.org:col:15670						Plantae	Tracheophyta	Sapindales	Sapindaceae	Magnoliopsida	E	ICBN
PRESERVED_SPECIMEN	Acer pseudoplatanus f. corstorphinense Schwer.	FORM	NL	http://data.biodiversitydata.nl/naturalis/specimen/L.2297291	L.2297291	Acer	pseudoplatanus	Netherlands	1954	1954-05-19	Zundert, Kwekerij Lombarts	Boom BK	corstorphinense				L	1954/05/19		Noord-Brabant	Boom BK	1954-07-01T00:00:00.000+0000	EUROPE	L.2297291	5	19																Plantae	Tracheophyta	Sapindales	Sapindaceae	Magnoliopsida	Botany	ICN	Plantae|Magnoliopsidae|Sapindales|Aceraceae
PRESERVED_SPECIMEN	Acer pseudoplatanus L.	SPECIES	BE	http://www.botanicalcollections.be/specimen/BR0000026817637V	BR0000026817637V	Acer	pseudoplatanus	Belgium	1979	1979-10-27	Laken (Brussel; Prov. Brabant)	Studenten 2e kandidatuur Academiejaar 1979 - 1980					BR							http://www.botanicalcollections.be/specimen/BR0000026817637V	10	27		2017-05-17	I / 8								Meise Botanic Garden					Plantae	Tracheophyta	Sapindales	Sapindaceae	Magnoliopsida		ICBN
PRESERVED_SPECIMEN	Aceras anthropophorum (L.) W.T.Aiton	SPECIES	GB	http://data.rbge.org.uk/herb/E00431314	E00431314	Orchis	anthropophorum	United Kingdom	1840	1840-01-01	near Deal						E	1840		England				http://data.rbge.org.uk/herb/E00431314			(VC 15) East Kent	2013-11-27							BGBASE:456104	http://biocol.org/urn:lsid:biocol.org:col:15670						Plantae	Tracheophyta	Asparagales	Orchidaceae	Liliopsida	E	ICBN
PRESERVED_SPECIMEN	Aceras anthropophorum (L.) W.T.Aiton	SPECIES	GB	http://data.rbge.org.uk/herb/E00431342	E00431342	Orchis	anthropophorum	United Kingdom	1838	1838-07-10	W of Cobham	Farre, F.					E	1838-07-10		England				http://data.rbge.org.uk/herb/E00431342	7	10	(VC 16) West Kent	2013-12-24							BGBASE:456183	http://biocol.org/urn:lsid:biocol.org:col:15670						Plantae	Tracheophyta	Asparagales	Orchidaceae	Liliopsida	E	ICBN
PRESERVED_SPECIMEN	Achyrocline satureioides var. albicans (Griseb.) Baker	VARIETY	BR	http://specimens.kew.org/herbarium/K001107550	K001107550	Achyrocline	satureioides	Brazil				Smith, D.	albicans				K							K001107550				2015-06-11	328													Plantae	Tracheophyta	Asterales	Asteraceae	Magnoliopsida	Herbarium		COMPOSITAE
PRESERVED_SPECIMEN	Acisanthera inundata (DC.) Triana	SPECIES	BR	http://specimens.kew.org/herbarium/K000530784	K000530784	Noterophila	inundata	Brazil			in pratis [staginovis] inter Oeiras et Caxias, in locis [areno uliquiaris]						K							K000530784				2008-05-23														Plantae	Tracheophyta	Myrtales	Melastomataceae	Magnoliopsida	Herbarium		MELASTOMATACEAE
PRESERVED_SPECIMEN	Acridocarpus ballyi Launert	SPECIES	KE	43298286-0ea3-4999-abec-7bb712a456e7	BM000574146	Acridocarpus	ballyi	Kenya	1975	1975-06-14		Peter René Oscar Bally		0.529861	37.857882	WGS84	BM		HOLOTYPE		Charles Cavender (Chuck) Davis		AFRICA	4671266	6	14		2017-10-20	16871	Arid semidesert, on rocky hills and in sandy plain					NHMUK:ecatalogue:4671266							Plantae	Tracheophyta	Malpighiales	Malpighiaceae	Magnoliopsida	BOT		Malpighiaceae
PRESERVED_SPECIMEN	Acrocryphaea plicatula Dixon & Thér.	SPECIES	CD	http://coldb.mnhn.fr/catalognumber/mnhn/pc/pc0106857	PC0106857	Schoenobryum	plicatula	Congo, Democratic Republic of the	1913	1913-11-07		Bequaert					P		TYPE					http://coldb.mnhn.fr/catalognumber/mnhn/pc/pc0106857	11	7		2015-09-24			sur branche morte											Plantae	Bryophyta	Leucodontales	Cryphaeaceae	Bryopsida	PC
PRESERVED_SPECIMEN	Acrotrema intermedium Thwaites	SPECIES	LK	http://coldb.mnhn.fr/catalognumber/mnhn/p/p00202007	P00202007	Acrotrema	intermedium	Sri Lanka	1854	1854-01-01		Thwaites, G.H.K.					P		TYPE					http://coldb.mnhn.fr/catalognumber/mnhn/p/p00202007				2015-10-02														Plantae	Tracheophyta	Dilleniales	Dilleniaceae	Magnoliopsida	P
PRESERVED_SPECIMEN	Actiniopteris pauciloba Pic.Serm.	SPECIES	CD	http://www.botanicalcollections.be/specimen/BR0000013468668	BR0000013468668	Actiniopteris	pauciloba	Congo, Democratic Republic of the	1981	1981-04-03	Mindigi	Malaisse F.		-11.1	26.166667	WGS84	BR		ISOTYPE					http://www.botanicalcollections.be/specimen/BR0000013468668	4	3		2013-03-08	11751								Meise Botanic Garden					Plantae	Tracheophyta	Polypodiales	Pteridaceae	Polypodiopsida		ICBN
PRESERVED_SPECIMEN	Actinodium cunninghamii Schauer	SPECIES	AU	http://www.botanicalcollections.be/specimen/BR0000013545291	BR0000013545291	Actinodium	cunninghamii	Australia			S.L.	Preiss J.A.					BR	S.D.						http://www.botanicalcollections.be/specimen/BR0000013545291				2014-11-27	432								Meise Botanic Garden					Plantae	Tracheophyta	Myrtales	Myrtaceae	Magnoliopsida		ICBN
PRESERVED_SPECIMEN	Actinotus leucocephalus Benth.	SPECIES	AU	http://www.botanicalcollections.be/specimen/BR0000013540012	BR0000013540012	Actinotus	leucocephalus	Australia			S.L.	Preiss J.A.					BR	S.D.						http://www.botanicalcollections.be/specimen/BR0000013540012				2015-01-28	2056								Meise Botanic Garden					Plantae	Tracheophyta	Apiales	Apiaceae	Magnoliopsida		ICBN
PRESERVED_SPECIMEN	Adiantum aleuticum	species	FI	http://id.luomus.fi/H.1099717	H.1099717	Adiantum	aleuticum	Finland	1971	1971-06-21		Alanko, Pentti					H	21.06.1971					North America	http://tun.fi/MY.745084	6	21		1492084446	17,074						H1099717	http://tun.fi/HR.168	Luomus, University of Eastern Finland	Nylandia, Elimäki, Arboretum Mustila, (60º44'N 26º29'E)	GX.231
PRESERVED_SPECIMEN	Adiantum caudatum L.	SPECIES	ID	http://data.biodiversitydata.nl/naturalis/specimen/L.3499241	L.3499241	Adiantum	caudatum	Indonesia	1953	1953-12-19	E.Port.Timor, Muapitine, Plateau of Fuiloro (Lautem). On limestone rocks in forest on escarpment.	Herb Steenis CGGJ van					L	1953/12/19					ASIA	L.3499241	12	19																Plantae	Tracheophyta	Polypodiales	Pteridaceae	Polypodiopsida	Botany	ICN	Plantae|Pteropsida|Polypodiales|Adiantaceae
PRESERVED_SPECIMEN	Adiantum macrophyllum	species	FI	http://id.luomus.fi/H.1080032	H.1080032	Adiantum	macrophyllum	Finland	1972	1972-02-23		Alanko, Pentti					H	23.02.1972						http://tun.fi/MY.744799	2	23		1492084440	19,305						H1080032	http://tun.fi/HR.168	Luomus, University of Eastern Finland	Helsinki, Kaisaniemi, cultivated in the Botanical Garden in greenhouse B1	GX.270
PRESERVED_SPECIMEN	Adiantum macrophyllum	species	FI	http://id.luomus.fi/H.1099712	H.1099712	Adiantum	macrophyllum	Finland	1972	1972-02-23		Alanko, Pentti					H	23.02.1972						http://tun.fi/MY.745069	2	23		1492084446	19,305						H1099712	http://tun.fi/HR.168	Luomus, University of Eastern Finland	Helsinki, Kaisaniemi, cultivated in the Botanical Garden in greenhouse	GX.270
PRESERVED_SPECIMEN	Adiantum pedatum L.	SPECIES	US	http://www.botanicalcollections.be/specimen/BR0000005793532	BR0000005793532	Adiantum	pedatum	United States	1833	1833-05-02	Missouri	Wied M.					BR							http://www.botanicalcollections.be/specimen/BR0000005793532	5	2		2011-12-05	S.N.								Meise Botanic Garden					Plantae	Tracheophyta	Polypodiales	Pteridaceae	Polypodiopsida		ICBN
PRESERVED_SPECIMEN	Adiantum poiretii	species	ET	http://id.luomus.fi/H.1084018	H.1084018	Adiantum	poiretii	Ethiopia	1965	1965-10-14	Mount Entoto, c. 5 km W of Addis Ababa, along Blue Nile road						H	14.10.1965					Africa	http://tun.fi/MY.744835	10	14		1492084441							H1084018	http://tun.fi/HR.168	Luomus, University of Eastern Finland	alt. ± 2600 m; Mt-Entotto	GX.231
PRESERVED_SPECIMEN	Adiantum raddianum	species	FI	http://id.luomus.fi/H.1080985	H.1080985	Adiantum	raddianum	Finland	1972	1972-03-07		Alanko, Pentti					H	07.03.1972						http://tun.fi/MY.744808	3	7		1492084440	19,342						H1080985	http://tun.fi/HR.168	Luomus, University of Eastern Finland	Helsinki, Kaisaniemi, cultivated in the Botanical Garden in greenhouse B1	GX.231
PRESERVED_SPECIMEN	Adiantum raddianum	species	FI	http://id.luomus.fi/H.1099710	H.1099710	Adiantum	raddianum	Finland	1968	1968-10-01		Alanko, Pentti					H	01.10.1968						http://tun.fi/MY.745063	10	1		1492084446	7527						H1099710	http://tun.fi/HR.168	Luomus, University of Eastern Finland	U, Helsinki, Viikki, University of Helsinki Institute of Horticulture, cult, in greenhouse	GX.231
PRESERVED_SPECIMEN	Adiantum raddianum	species	FI	http://id.luomus.fi/H.1099713	H.1099713	Adiantum	raddianum	Finland	1972	1972-03-07		Alanko, Pentti					H	07.03.1972						http://tun.fi/MY.745072	3	7		1492084446	19,342						H1099713	http://tun.fi/HR.168	Luomus, University of Eastern Finland	Helsinki, Kaisaniemi, cultivated in the Botanical Garden in greenhouse B1	GX.270
PRESERVED_SPECIMEN	Adiantum wilsonii Hook.	SPECIES	JM	cc637cd5-0cad-4972-a950-073bc4e32961	BM000936708	Adiantum	wilsonii	Jamaica	1847	1847-01-01		Nathaniel Wilson		18.151419	-77.319014	WGS84	BM		HOLOTYPE				NORTH_AMERICA	457986				2017-10-19	32						NHMUK:ecatalogue:457986							Plantae	Tracheophyta	Polypodiales	Pteridaceae	Polypodiopsida	BOT		Pteridaceae
PRESERVED_SPECIMEN	Adonis flammea Jacq.	SPECIES	FR	http://coldb.mnhn.fr/catalognumber/mnhn/p/p00598227	P00598227	Adonis	flammea	France	1884	1884-05-01		Legris					P			92 Hauts-de-Seine				http://coldb.mnhn.fr/catalognumber/mnhn/p/p00598227	5			2015-09-05										Gennevilliers (Seine)				Plantae	Tracheophyta	Ranunculales	Ranunculaceae	Magnoliopsida	P
PRESERVED_SPECIMEN	Adriana quadripartita Gaudich.	SPECIES	AU	http://www.botanicalcollections.be/specimen/BR0000013311186	BR0000013311186	Adriana	quadripartita	Australia			S.L.	Preiss J.A.					BR	S.D.						http://www.botanicalcollections.be/specimen/BR0000013311186				2012-10-04	1206								Meise Botanic Garden					Plantae	Tracheophyta	Malpighiales	Euphorbiaceae	Magnoliopsida		ICBN
PRESERVED_SPECIMEN	Aeschynanthus lasianthus W.T.Wang	SPECIES	CN	http://data.rbge.org.uk/herb/E00087185	E00087185	Aeschynanthus	lasianthus	China	1916	1916-08-17	Tjiontson et Pipiti [Bi Bi Li] ad fluvium Lu-djiang (Salween) infra Tschumatong	Handel-Mazzetti, H.					E	1916-08-17		Yunnan				http://data.rbge.org.uk/herb/E00087185	8	17		2001-03-06	9832					1700 M	BGBASE:97068	http://biocol.org/urn:lsid:biocol.org:col:15670						Plantae	Tracheophyta	Lamiales	Gesneriaceae	Magnoliopsida	E	ICBN
PRESERVED_SPECIMEN	Aeschynanthus mendumiae D.J.Middleton	SPECIES	LA	http://data.rbge.org.uk/herb/E00246564	E00246564	Aeschynanthus	mendumiae	Lao People's Democratic Republic	2005	2005-10-25	South eastern slopes of Phou Yang	Newman, M F; Thomas, P I; Armstrong, K E; Sengdala, Khamphone & Lamxay, Vichith		17.8	105.55	WGS84	E	2005-10-25	HOLOTYPE	Khammouan				http://data.rbge.org.uk/herb/E00246564	10	25		2009-09-07	LAO 1020					850 M	BGBASE:259282	http://biocol.org/urn:lsid:biocol.org:col:15670						Plantae	Tracheophyta	Lamiales	Gesneriaceae	Magnoliopsida	E	ICBN
PRESERVED_SPECIMEN	Aeschynanthus tengchungensis W.T.Wang	SPECIES	CN	http://data.rbge.org.uk/herb/E00087190	E00087190	Aeschynanthus	tengchungensis	China	1924		Shweli Salwin divide	Forrest, George		25.666667	98.75	WGS84	E	June 1924		Yunnan				http://data.rbge.org.uk/herb/E00087190				2000-10-27	24499					7000 FT	BGBASE:97081	http://biocol.org/urn:lsid:biocol.org:col:15670						Plantae	Tracheophyta	Lamiales	Gesneriaceae	Magnoliopsida	E	ICBN
PRESERVED_SPECIMEN	Aeschynomene sensitiva Sw.	SPECIES	BR	http://coldb.mnhn.fr/catalognumber/mnhn/p/p00758207	P00758207	Aeschynomene	sensitiva	Brazil				Saint-Hilaire, A. de					P			Rio de Janeiro				http://coldb.mnhn.fr/catalognumber/mnhn/p/p00758207			rio de janeiro	2015-09-04										Province de Rio de Janeiro				Plantae	Tracheophyta	Fabales	Fabaceae	Magnoliopsida	P
PRESERVED_SPECIMEN	Aesculus hippocastanum L.	SPECIES	GB	http://specimens.kew.org/herbarium/K000914265	K000914265	Aesculus	hippocastanum	United Kingdom	2009	2009-04-29	Kew Gardens; South Arboretum: in a shubbery between Unicorn Gate and the Gallery (zone 482)	Cope, T.A.					K				Cope, T.A.			K000914265	4	29		2013-07-29	RBG 339													Plantae	Tracheophyta	Sapindales	Sapindaceae	Magnoliopsida	Herbarium		SAPINDACEAE
PRESERVED_SPECIMEN	Aganope heptaphylla (L.) Polhill	SPECIES	ID	http://data.biodiversitydata.nl/naturalis/specimen/L.2070050	L.2070050	Aganope	heptaphylla	Indonesia				Unknown					L			Java	Sirichamorn Y	2009-06-09T00:00:00.000+0000	ASIA	L.2070050																		Plantae	Tracheophyta	Fabales	Fabaceae	Magnoliopsida	Botany	ICN	Plantae|Magnoliopsidae|Fabales|Leguminosae-Pap.
PRESERVED_SPECIMEN	Aglaia edulis A.Gray	SPECIES	ID	http://data.biodiversitydata.nl/naturalis/specimen/L%20%200016829	L 0016829	Dysoxylum	edulis	Indonesia	1898	1898-02-28	Besoeki, Poeger.	Koorders SH					L	1898/02/28	ISOLECTOTYPE	Java	Pannell CM	1989-08-02T00:00:00.000+0000	ASIA	L 0016829	2	28																Plantae	Tracheophyta	Sapindales	Meliaceae	Magnoliopsida	Botany	ICN	Plantae|Magnoliopsidae|Sapindales|Meliaceae
PRESERVED_SPECIMEN	Aglaia elaeagnoidea Benth.	SPECIES	AU	http://www.botanicalcollections.be/specimen/BR0000005798049	BR0000005798049	Aglaia	elaeagnoidea	Australia			Rockingham Bay	Von Mueller F.					BR	S.D.						http://www.botanicalcollections.be/specimen/BR0000005798049				2011-12-12	S.N.								Meise Botanic Garden					Plantae	Tracheophyta	Sapindales	Meliaceae	Magnoliopsida		ICBN
PRESERVED_SPECIMEN	Aglaothamnion hookeri (Dillwyn) Maggs & Hommersand	SPECIES	FR	http://coldb.mnhn.fr/catalognumber/mnhn/pc/pc0613407	PC0613407	Aglaothamnion	hookeri	France	1861	1861-03-26	Cherbourg						P			50 Manche				http://coldb.mnhn.fr/catalognumber/mnhn/pc/pc0613407	3	26		2015-09-28										Cherbourg				Plantae	Rhodophyta	Ceramiales	Callithamniaceae	Florideophyceae	PC
PRESERVED_SPECIMEN	Aglaothamnion tenuissimum (Bonnemaison) Feldmann-Mazoyer	SPECIES	GB	http://data.rbge.org.uk/herb/E00704451	E00704451	Aglaothamnion	tenuissimum	United Kingdom	1975	1975-05-11	Burntisland	Caldwell, H.L.					E	1975-05-11		Scotland				http://data.rbge.org.uk/herb/E00704451	5	11	(VC 85) Fife	2015-07-16							BGBASE:725180	http://biocol.org/urn:lsid:biocol.org:col:15670						Plantae	Rhodophyta	Ceramiales	Callithamniaceae	Florideophyceae	E	ICBN
PRESERVED_SPECIMEN	Agonis linearifolia Schauer	SPECIES	AU	http://www.botanicalcollections.be/specimen/BR0000013545314	BR0000013545314	Agonis	linearifolia	Australia			[Perth]	Preiss J.A.					BR	[Jun 1839]						http://www.botanicalcollections.be/specimen/BR0000013545314				2014-11-28	142								Meise Botanic Garden					Plantae	Tracheophyta	Myrtales	Myrtaceae	Magnoliopsida		ICBN
PRESERVED_SPECIMEN	Agrimonia gryposepala Wallr.	SPECIES	US	http://www.botanicalcollections.be/specimen/BR0000025565478V	BR0000025565478V	Agrimonia	gryposepala	United States				Thomas R.D.					BR							http://www.botanicalcollections.be/specimen/BR0000025565478V				2017-02-06	20449								Meise Botanic Garden					Plantae	Tracheophyta	Rosales	Rosaceae	Magnoliopsida		ICBN
PRESERVED_SPECIMEN	Agropyron caninum (L.) P.Beauv.	SPECIES	none	http://coldb.mnhn.fr/catalognumber/mnhn/p/p03156337	P03156337	Elymus	caninum										P							http://coldb.mnhn.fr/catalognumber/mnhn/p/p03156337				2015-09-04														Plantae	Tracheophyta	Poales	Poaceae	Liliopsida	P
PRESERVED_SPECIMEN	Agrostis alba L.	SPECIES	none	http://coldb.mnhn.fr/catalognumber/mnhn/p/p02226847	P02226847	Poa	alba										P							http://coldb.mnhn.fr/catalognumber/mnhn/p/p02226847				2015-09-04														Plantae	Tracheophyta	Poales	Poaceae	Liliopsida	P
PRESERVED_SPECIMEN	Agrostis canina L.	SPECIES	EE	TU278158	TU278158	Agrostis	canina	Estonia	1857	1857-06-22	Läänemaalt, Kirbla vald.						TU	1857-06-22			K. Mölder	1857-06-22T00:00:00.000+0000		TU278158	6	22											Natural History Museum, University of Tartu		4			Plantae	Tracheophyta	Poales	Poaceae	Liliopsida	TU		Viridiplantae; Anthophyta; Monocotyledonae; Poales; Poaceae; Agrostis
PRESERVED_SPECIMEN	Agrostis L.	GENUS	EE	TU350606	TU350606	Agrostis		Estonia	1964	1964-07-12	Harju rajoon, Kostivere	A.-M. Leis					TU	1964-07-12			A.-M. Leis	1964-07-12T00:00:00.000+0000		TU350606	7	12				habitat: niidult							Natural History Museum, University of Tartu		4			Plantae	Tracheophyta	Poales	Poaceae	Liliopsida	TU		Viridiplantae; Anthophyta; Monocotyledonae; Poales; Poaceae; Agrostis
PRESERVED_SPECIMEN	Agrostis L.	GENUS	EE	TU350616	TU350616	Agrostis		Estonia	1929	1929-07-06	Pullapä (=Pullapää)	B. Fromhold-Treu					TU	1929-07-06			B. Fromhold-Treu	1929-07-06T00:00:00.000+0000		TU350616	7	6				habitat: Strand (=rand)			Etiketil: Agrostis alba var. maritima Lam.				Natural History Museum, University of Tartu		4			Plantae	Tracheophyta	Poales	Poaceae	Liliopsida	TU		Viridiplantae; Anthophyta; Monocotyledonae; Poales; Poaceae; Agrostis
PRESERVED_SPECIMEN	Agrostis stolonifera L.	SPECIES	EE	TU350490	TU350490	Agrostis	stolonifera	Estonia	1979	1979-07-01	Harju rajoon, Joaveski	Ü. Küüts | R. Aguraiuja					TU	1979-07			R. Aguraiuja | Ü. Küüts	1979-07-01T00:00:00.000+0000		TU350490	7												Natural History Museum, University of Tartu		4			Plantae	Tracheophyta	Poales	Poaceae	Liliopsida	TU		Viridiplantae; Anthophyta; Monocotyledonae; Poales; Poaceae; Agrostis
PRESERVED_SPECIMEN	Agrostis stolonifera L.	SPECIES	EE	TU350525	TU350525	Agrostis	stolonifera	Estonia	1930	1930-06-18	Pärnumaa, Selistest W mereni, mereranda mööda Puti poole	T. Lippmaa					TU	1930-06-18			T. Lippmaa	1930-06-18T00:00:00.000+0000		TU350525	6	18				habitat: rannas Fucuse (=adru) kuhjade läheduses					8377		Natural History Museum, University of Tartu		4			Plantae	Tracheophyta	Poales	Poaceae	Liliopsida	TU		Viridiplantae; Anthophyta; Monocotyledonae; Poales; Poaceae; Agrostis
PRESERVED_SPECIMEN	Agrostis stolonifera L.	SPECIES	EE	TU350609	TU350609	Agrostis	stolonifera	Estonia	1967	1967-07-16	Kohtla-Järve rajoon, Gorodenko, Narva jõe vasakul kaldal	A. Saar | L. Murdam					TU	1967-07-16			A. Saar | L. Murdam	1967-07-16T00:00:00.000+0000		TU350609	7	16				habitat: niidul							Natural History Museum, University of Tartu		4			Plantae	Tracheophyta	Poales	Poaceae	Liliopsida	TU		Viridiplantae; Anthophyta; Monocotyledonae; Poales; Poaceae; Agrostis
PRESERVED_SPECIMEN	Agrostis tenuis Sibth.	SPECIES	BE	http://www.botanicalcollections.be/specimen/BR0000027501016V	BR0000027501016V	Agrostis	tenuis	Belgium	1958	1958-07-23	Renaix	Gérard Lebailly					BR							http://www.botanicalcollections.be/specimen/BR0000027501016V	7	23		2017-10-09	81								Meise Botanic Garden					Plantae	Tracheophyta	Poales	Poaceae	Liliopsida		ICBN
PRESERVED_SPECIMEN	Agrostis tenuis Sibth.	SPECIES	EE	TU350427	TU350427	Agrostis	tenuis	Estonia	1973	1973-07-25	Põlva rajoon, Kanepi	L. Pihlapuu					TU	1973-07-25			L. Pihlapuu	1973-07-25T00:00:00.000+0000		TU350427	7	25				habitat: põõsaste vahel aias							Natural History Museum, University of Tartu		4			Plantae	Tracheophyta	Poales	Poaceae	Liliopsida	TU		Viridiplantae; Anthophyta; Monocotyledonae; Poales; Poaceae; Agrostis
PRESERVED_SPECIMEN	Ajuga reptans L.	SPECIES	none	http://coldb.mnhn.fr/catalognumber/mnhn/p/p04233147	P04233147	Ajuga	reptans										P							http://coldb.mnhn.fr/catalognumber/mnhn/p/p04233147				2015-09-04														Plantae	Tracheophyta	Lamiales	Lamiaceae	Magnoliopsida	P
PRESERVED_SPECIMEN	Albizia corniculata Druce	SPECIES	ID	http://data.biodiversitydata.nl/naturalis/specimen/L.1933299	L.1933299	Albizia	corniculata	Indonesia	1993	1993-07-27	Indonesia Sulawesi Sulawesi Tenggara Kabaena	McDonald JA; Ismail A		-5.266667	121.933333	WGS84	L	1993/07/27		Sulawesi	McDonald		ASIA	L.1933299	7	27																Plantae	Tracheophyta	Fabales	Fabaceae	Magnoliopsida	Botany	ICN	Plantae|Magnoliopsidae|Fabales|Leguminosae-Mim.
PRESERVED_SPECIMEN	Alchemilla cymatophylla Juz.	SPECIES	EE	TU271252	TU271252	Alchemilla	cymatophylla	Estonia	1978	1978-06-24	Põlva rajoon, Kanepi	L. Pihlapuu					TU	1978-06-24			L. Pihlapuu	1978-06-24T00:00:00.000+0000		TU271252	6	24				habitat: niiduserval paikneva aia nurgas põõsastes					190604129		Natural History Museum, University of Tartu		4			Plantae	Tracheophyta	Rosales	Rosaceae	Magnoliopsida	TU		Viridiplantae; Anthophyta; Eudicotyledonae; Rosales; Rosaceae; Alchemilla
PRESERVED_SPECIMEN	Alchemilla cymatophylla Juz.	SPECIES	EE	TU271253	TU271253	Alchemilla	cymatophylla	Estonia	1933	1933-06-02	Köstiveski Viljandi juures	W.J. Reinthal					TU	1933-06-02			W.J. Reinthal	1933-12-24T00:00:00.000+0000		TU271253	6	2				habitat: kuival kingul					19100602		Natural History Museum, University of Tartu		4			Plantae	Tracheophyta	Rosales	Rosaceae	Magnoliopsida	TU		Viridiplantae; Anthophyta; Eudicotyledonae; Rosales; Rosaceae; Alchemilla
PRESERVED_SPECIMEN	Alchemilla wichurae (Buser) Stefansson	SPECIES	GB	ad5cf812-1280-4508-9c68-f4ddfc07a41a	BM000815211	Alchemilla	wichurae	United Kingdom	1931	1931-07-28	Nearest Named Place: Beinn Laoigh	Alfred James Wilmott		56.1625	-5.2789	WGS84	BM			Scotland			EUROPE	435577	7	28			3854[G]						NHMUK:ecatalogue:435577							Plantae	Tracheophyta	Rosales	Rosaceae	Magnoliopsida	BOT
PRESERVED_SPECIMEN	Alchornea triplinervia Müll.Arg.	SPECIES	BR	http://specimens.kew.org/herbarium/K001206129	K001206129	Alchornea	triplinervia	Brazil	1996	1996-09-12	Canyon Guartelá.	Giraldi, C.					K							K001206129	9	12		2015-12-01	s.n.													Plantae	Tracheophyta	Malpighiales	Euphorbiaceae	Magnoliopsida	Herbarium		EUPHORBIACEAE
PRESERVED_SPECIMEN	Alectryon diversifolius (F.Muell.) S.T.Reynolds	SPECIES	AU	http://www.botanicalcollections.be/specimen/BR0000013229016	BR0000013229016	Alectryon	diversifolius	Australia			Queensland	Dallachy J.					BR	S.D.						http://www.botanicalcollections.be/specimen/BR0000013229016				2013-11-28	S.N.								Meise Botanic Garden					Plantae	Tracheophyta	Sapindales	Sapindaceae	Magnoliopsida		ICBN
PRESERVED_SPECIMEN	Aleuritopteris farinosa	species	ET	http://id.luomus.fi/H.1073986	H.1073986	Aleuritopteris	farinosa	Ethiopia	1972	1972-01-25	Begember, Simien National Park, Geech plateau, on the dry bottom of the tributary of Djinn Bahr	Heinonen, Kirsti					H	25.01.1972		Amhara			Africa	http://tun.fi/MY.744517	1	25	Semien Gondar	1492084435	1011						H1073986	http://tun.fi/HR.168	Luomus, University of Eastern Finland	3550 m above sea	GX.231
PRESERVED_SPECIMEN	Allium angulosum L.	SPECIES	EE	TU272285	TU272285	Allium	angulosum	Estonia	1931	1931-06-27	Reval (=Tallinn): prope cimaeterium judaicum (=juudi surnuaia lähedal)	J. Rubel					TU	1931-06-27			J. Rubel	1931-06-27T00:00:00.000+0000		TU272285	6	27				habitat: in prato (=niidul) satis copiose					31-132; 2118		Natural History Museum, University of Tartu		4			Plantae	Tracheophyta	Asparagales	Amaryllidaceae	Liliopsida	TU		Viridiplantae; Anthophyta; Monocotyledonae; Alliaceae; Allium
PRESERVED_SPECIMEN	Allium ursinum L.	SPECIES	EE	TU253504	TU253504	Allium	ursinum	Estonia	1972	1972-07-17	Viljandi rajoon, Kõpu, Tipu asula Pääsma	Ü. Karu					TU	1972-07-17			Ü. Karu	1972-07-17T00:00:00.000+0000		TU253504	7	17				habitat: lammimets							Natural History Museum, University of Tartu		4			Plantae	Tracheophyta	Asparagales	Amaryllidaceae	Liliopsida	TU		Viridiplantae; Anthophyta; Monocotyledonae; Alliaceae; Allium
PRESERVED_SPECIMEN	Allium vineale L.	SPECIES	EE	TU250942	TU250942	Allium	vineale	Estonia	1973	1973-07-21		L. Pihlapuu					TU	1973-07-21			L. Pihlapuu	1973-07-21T00:00:00.000+0000		TU250942	7	21				habitat: aias							Natural History Museum, University of Tartu		4			Plantae	Tracheophyta	Asparagales	Amaryllidaceae	Liliopsida	TU		Viridiplantae; Anthophyta; Monocotyledonae; Alliaceae; Allium
PRESERVED_SPECIMEN	Aloe patersonii B.Mathew	SPECIES	none	http://specimens.kew.org/herbarium/K000256371	K000256371	Aloe	patersonii		1975	1975-11-24	About 30-35 km from Kolwezi on road to Muso-Kantanda.	Paterson, A.					K		ISOTYPE		B.Mathew	1976-03-26T00:00:00.000+0000		K000256371	11	24		2004-10-27	515		Flowers salmon with white margin to lobes. Leaves spotted white above, lined darker green below.											Plantae	Tracheophyta	Asparagales	Asphodelaceae	Liliopsida	Herbarium		ALOACEAE
PRESERVED_SPECIMEN	Alopecurus arundinaceus Poir.	SPECIES	EE	TU278215	TU278215	Alopecurus	arundinaceus	Estonia	1972	1972-06-17	Haapsalu raj., Matsalu, Penijõe äärsel niidul.	L. Pihlapuu					TU	1972-06-17			L. Pihlapuu	1972-06-17T00:00:00.000+0000		TU278215	6	17				habitat: Niidul.							Natural History Museum, University of Tartu		4			Plantae	Tracheophyta	Poales	Poaceae	Liliopsida	TU		Viridiplantae; Anthophyta; Monocotyledonae; Poales; Poaceae; Alopecurus
PRESERVED_SPECIMEN	Alopecurus geniculatus L.	SPECIES	BE	http://www.botanicalcollections.be/specimen/BR0000025752342V	BR0000025752342V	Alopecurus	geniculatus	Belgium	1980	1980-04-28	Rivierenhof-Deurne- Prov.Antwerpen	Collector unknown					BR							http://www.botanicalcollections.be/specimen/BR0000025752342V	4	28		2017-06-14	II/56								Meise Botanic Garden					Plantae	Tracheophyta	Poales	Poaceae	Liliopsida		ICBN
PRESERVED_SPECIMEN	Alopecurus geniculatus L.	SPECIES	EE	TU350727	TU350727	Alopecurus	geniculatus	Estonia	1972	1972-07-09	Võru rajoon, Obinitsa	M. Kursitis					TU	1972-07-09			M. Kursitis	1972-07-09T00:00:00.000+0000		TU350727	7	9				habitat: karjamaalt							Natural History Museum, University of Tartu		4			Plantae	Tracheophyta	Poales	Poaceae	Liliopsida	TU		Viridiplantae; Anthophyta; Monocotyledonae; Poales; Poaceae; Alopecurus
PRESERVED_SPECIMEN	Alopecurus geniculatus L.	SPECIES	NL	http://data.biodiversitydata.nl/naturalis/specimen/L.3071287	L.3071287	Alopecurus	geniculatus	Netherlands			Wieringen. K4.25.23.	Unreadable					L	1928/08/31 | 1928/08/01		Noord-Holland			EUROPE	L.3071287																		Plantae	Tracheophyta	Poales	Poaceae	Liliopsida	Botany	ICN	Plantae|Magnoliopsidae|Poales|Gramineae
PRESERVED_SPECIMEN	Alopecurus ventricosus Pers.	SPECIES	EE	TU278233	TU278233	Alopecurus	ventricosus	Estonia	1972	1972-06-17	Haapsalu raj., Matsalu, Penijõel.	L. Pihlapuu					TU	1972-06-17			L. Pihlapuu	1972-06-17T00:00:00.000+0000		TU278233	6	17				habitat: Jõeäärsel niidul.							Natural History Museum, University of Tartu		4			Plantae	Tracheophyta	Poales	Poaceae	Liliopsida	TU		Viridiplantae; Anthophyta; Monocotyledonae; Poales; Poaceae; Alopecurus
PRESERVED_SPECIMEN	Alphonsea johorensis J.Sinclair	SPECIES	MY	http://data.rbge.org.uk/herb/E00393090	E00393090	Alphonsea	johorensis	Malaysia	1936	1936-10-21	Sunggei Kayu, E.Johore	Sidek Bin Kiah					E	1936-10-21	ISOTYPE					http://data.rbge.org.uk/herb/E00393090	10	21		2010-05-26	32139						BGBASE:431459	http://biocol.org/urn:lsid:biocol.org:col:15670						Plantae	Tracheophyta	Magnoliales	Annonaceae	Magnoliopsida	E	ICBN
PRESERVED_SPECIMEN	Alstonia iwahigensis Elmer	SPECIES	PH	http://data.biodiversitydata.nl/naturalis/specimen/L%20%200004873	L 0004873	Alstonia	iwahigensis	Philippines			Puerto Princesa (Mt. Pulgar), Province of Palawan.Island of Palawan.	Elmer ADE					L	1911/05/31 | 1911/05/01	LECTOTYPE	Palawan	Sidiyasa EF		ASIA	L 0004873																		Plantae	Tracheophyta	Gentianales	Apocynaceae	Magnoliopsida	Botany	ICN	Plantae|Magnoliopsidae|Gentianales|Apocynaceae
PRESERVED_SPECIMEN	Alyssum lanceolatum Baumgartner	SPECIES	TR	http://data.rbge.org.uk/herb/E00386021	E00386021	Alyssum	lanceolatum	Turkey	1898	1898-01-01	Turcomania. In m.Kular pr. Gaudan	Litwinow, Dimitri Ivanovich					E	1898	TYPE					http://data.rbge.org.uk/herb/E00386021				2010-03-22	569					7000 FT	BGBASE:425632	http://biocol.org/urn:lsid:biocol.org:col:15670						Plantae	Tracheophyta	Brassicales	Brassicaceae	Magnoliopsida	E	ICBN
PRESERVED_SPECIMEN	Alyssum murale subsp. murale	SUBSPECIES	GR	http://data.rbge.org.uk/herb/E00438365	E00438365	Alyssum	murale	Greece	1857	1857-06-07	Kyllenes Achaiea	Orphanides, Theodorus Georgios	murale				E	1857-06-07	TYPE					http://data.rbge.org.uk/herb/E00438365	6	7		2010-03-25	294					3500 FT	BGBASE:426252	http://biocol.org/urn:lsid:biocol.org:col:15670						Plantae	Tracheophyta	Brassicales	Brassicaceae	Magnoliopsida	E	ICBN
PRESERVED_SPECIMEN	Amansia pinnatifida Harv.	SPECIES	AU	59c660df-7a51-40eb-9226-fee6a71eb60c	BM001039578	Amansia	pinnatifida	Australia				Anon.					BM			Western Australia			OCEANIA	723915				2017-08-21	S.N.						NHMUK:ecatalogue:723915							Plantae	Rhodophyta	Ceramiales	Rhodomelaceae	Florideophyceae	BOT		Delesseriaceae
PRESERVED_SPECIMEN	Amansia pinnatifida Harv.	SPECIES	AU	ebc20f5a-d994-4ec5-a8f9-fe77503f99ea	BM001039580	Amansia	pinnatifida	Australia				Mary Philadelphia Merrifield					BM			Western Australia			OCEANIA	723924				2017-08-21	s.n.						NHMUK:ecatalogue:723924							Plantae	Rhodophyta	Ceramiales	Rhodomelaceae	Florideophyceae	BOT		Delesseriaceae
PRESERVED_SPECIMEN	Amaranthus albus L.	SPECIES	EE	TU272333	TU272333	Amaranthus	albus	Estonia	1975	1975-09-04	Võru, raudteejaamas, kaubaaida lähedal	L. Pihlapuu					TU	1975-09-04			L. Pihlapuu	1975-09-04T00:00:00.000+0000		TU272333	9	4											Natural History Museum, University of Tartu		4			Plantae	Tracheophyta	Caryophyllales	Amaranthaceae	Magnoliopsida	TU		Viridiplantae; Anthophyta; Eudicotyledonae; Caryophyllales; Amaranthaceae; Amaranthus
PRESERVED_SPECIMEN	Amaranthus albus L.	SPECIES	EE	TU272364	TU272364	Amaranthus	albus	Estonia	1960	1960-08-17	Keila, raudteejaama ala	A. Remmel					TU	1960-08-17			A. Remmel	1960-08-17T00:00:00.000+0000		TU272364	8	17				habitat: hulgi							Natural History Museum, University of Tartu		4			Plantae	Tracheophyta	Caryophyllales	Amaranthaceae	Magnoliopsida	TU		Viridiplantae; Anthophyta; Eudicotyledonae; Caryophyllales; Amaranthaceae; Amaranthus
PRESERVED_SPECIMEN	Amaranthus retroflexus L.	SPECIES	EE	TU300059	TU300059	Amaranthus	retroflexus	Estonia	1962	1962-08-31	Tallinn, Lasnamägi.	A. Remmel					TU	1962-08-31			A. Remmel	1962-08-31T00:00:00.000+0000		TU300059	8	31				habitat: raudteel							Natural History Museum, University of Tartu		4			Plantae	Tracheophyta	Caryophyllales	Amaranthaceae	Magnoliopsida	TU		Viridiplantae; Anthophyta; Eudicotyledonae; Caryophyllales; Amaranthaceae; Amaranthus
PRESERVED_SPECIMEN	Anacamptis pyramidalis (L.) Rich.	SPECIES	GB	6e08dee1-0914-42bf-b913-8bcf53164249	BM001110306	Anacamptis	pyramidalis	United Kingdom	1965	1965-07-27	Penny Hill, Penny Hill Quarry	Miss Lorna F. Bowden		52.251099	-2.3649	WGS84	BM			England			EUROPE	2803928	7	27			s.n.						NHMUK:ecatalogue:2803928							Plantae	Tracheophyta	Asparagales	Orchidaceae	Liliopsida	BOT		Orchidaceae
PRESERVED_SPECIMEN	Anadyomene stellata (Wulfen) C.Agardh	SPECIES	US	ad8a9992-e8cd-4baa-9e85-902975c9de98	BM000937262	Anadyomene	stellata	United States	1859	1859-10-18	Nearest Named Place: Key West	William Henry Harvey					BM			Florida			NORTH_AMERICA	474230	10	18									NHMUK:ecatalogue:474230							Plantae	Chlorophyta	Cladophorales	Anadyomenaceae	Ulvophyceae	BOT		Anadyomenaceae
PRESERVED_SPECIMEN	Anchusa arvensis (L.) M.Bieb.	SPECIES	FR	http://coldb.mnhn.fr/catalognumber/mnhn/p/p00595097	P00595097	Lycopsis	arvensis	France	1903	1903-01-01		Thomas, C.					P			51 Marne				http://coldb.mnhn.fr/catalognumber/mnhn/p/p00595097				2015-09-04										Fismes (Marne)				Plantae	Tracheophyta	Boraginales	Boraginaceae	Magnoliopsida	P
PRESERVED_SPECIMEN	Anchusa officinalis L.	SPECIES	FR	http://coldb.mnhn.fr/catalognumber/mnhn/p/p00596037	P00596037	Anchusa	officinalis	France	1938	1938-07-16		Haffner, Mme					P			24 Dordogne				http://coldb.mnhn.fr/catalognumber/mnhn/p/p00596037	7	16		2015-09-05										Baynac [Bayac] (Dordogne)				Plantae	Tracheophyta	Boraginales	Boraginaceae	Magnoliopsida	P
PRESERVED_SPECIMEN	Anchusa versicolor Steven	species	GE	http://id.luomus.fi/HA.H1613656	HA.H1613656	Anchusa	versicolor	GE	2010	2010-05-04	In agris circa Kasbek [= Mt. Kazbek].	Steven, C.					H		OriginalMaterial		A. Sennikov	4.5.2010		http://tun.fi/MY.109160	5	4		1382503661		In agris.					H1613656	http://tun.fi/HR.129	Luomus		GX.22		Steven
PRESERVED_SPECIMEN	Ancistrotropis peduncularis (Kunth) A.Delgado	SPECIES	BR	http://specimens.kew.org/herbarium/K000931304	K000931304	Vigna	peduncularis	Brazil	2007	2007-06-23	Serra das Umburanas.	Córdula, E.; Melo, Y.; Pinheiro, K.		-8.2	-38.53	WGS84	K				Lewis, G.P.			K000931304	6	23		2013-07-23	309													Plantae	Tracheophyta	Fabales	Fabaceae	Magnoliopsida	Herbarium		LEGUMINOSAE-PAPILIONOIDEAE
PRESERVED_SPECIMEN	Anemone albana Steven	SPECIES	NP	8d7843fb-8b71-463d-b4d2-100e26a2f65e	BM000521570	Pulsatilla	albana	Nepal	1802	1802-04-12		Buchanan					BM		HOLOTYPE		Krishna Kumar Shrestha		ASIA	432209	4	12			s.n.						NHMUK:ecatalogue:432209							Plantae	Tracheophyta	Ranunculales	Ranunculaceae	Magnoliopsida	BOT		Ranunculaceae
PRESERVED_SPECIMEN	Anemone coccinea Jordan	SPECIES	FR	http://coldb.mnhn.fr/catalognumber/mnhn/p/p00266547	P00266547	Anemone	coccinea	France	1866	1866-03-03		Hanry, H.					P			06 Alpes-Maritimes				http://coldb.mnhn.fr/catalognumber/mnhn/p/p00266547	3	3		2015-09-04										Grasse (Alpes maritimes)				Plantae	Tracheophyta	Ranunculales	Ranunculaceae	Magnoliopsida	P
PRESERVED_SPECIMEN	Anemone tamarae Kharkev.	species	RU	http://id.luomus.fi/HA.H1701393	HA.H1701393	Anemone	tamarae	RU	1978	1978-06-23	Khabaroskiy territory, Ayano-Mayskiy district, vicinity of village Aym, 17 km up stream of Semya river.	Yakubov, V.					H		Isotype		S. Kharkevich	23.6.1978		http://tun.fi/MY.110000	6	23		1382503668		Swarding stony slope, SW slope with Rhododendron adamsii and Carex macrogyna. Absently, rare.				400 meters	H1701393	http://tun.fi/HR.129	Luomus		GX.22		Kharkev.
PRESERVED_SPECIMEN	Angelica archangelica subsp. litoralis (Fries) Thell.	SUBSPECIES	EE	TU268326	TU268326	Angelica	archangelica	Estonia	1939	1939-06-27	Est. inferior, Lihula khk., Kassari sillale viiva teetammi kõrval	K. Eichwald	litoralis				TU	1939-06-27			K. Eichwald	1939-06-27T00:00:00.000+0000		TU268326	6	27				habitat: kraavis rohkesti					4336.		Natural History Museum, University of Tartu		4			Plantae	Tracheophyta	Apiales	Apiaceae	Magnoliopsida	TU		Viridiplantae; Anthophyta; Eudicotyledonae; Apiales; Apiaceae; Angelica
PRESERVED_SPECIMEN	Angelonia verticillata Philcox	SPECIES	BR	http://specimens.kew.org/herbarium/K000528885	K000528885	Angelonia	verticillata	Brazil	1977	1977-03-24	Serra do Rio de Contas Ca. 1 km south of small town of Mato Grosso on the road to Vila do Rio de Contas.	Mayo, S.J.; Santos, T.S.; Storr, R.M.; Pinheiro, R.S.; Harley, R.M.		-13.48	-41.82	WGS84	K		ISOTYPE					K000528885	3	24		2008-02-29	19929	Sandstone rock outcrops with small area of disturbed marsh at base, and nearby river with lush vegetation along rocky margins. This plant growing on dry rocky hillside.	Herb with slightly woody stems below, branches few, erect to ca. 1.75 m. Leaves rugose, glossy dark green, paler beneath. Leaves in 4's.	0.2										Plantae	Tracheophyta	Lamiales	Plantaginaceae	Magnoliopsida	Herbarium		SCROPHULARIACEAE
PRESERVED_SPECIMEN	Annamocalamus kontumensis H.N.Nguyen, N.H.Xia & V.T.Tran	SPECIES	VN	http://coldb.mnhn.fr/catalognumber/mnhn/p/p00451097	P00451097	Annamocalamus	kontumensis	Viet Nam	1995	1995-02-23		Averyanov, L.|Ban, N.T.|Binh, N.Q.|Budantzev, A.|Budantzev, L.|Hiep, N.T.|Huyen, D.D.|Loc, P.K.|Tam, N.X.|Yakovlev					P		HOLOTYPE		Haevermans			http://coldb.mnhn.fr/catalognumber/mnhn/p/p00451097	2	23		2015-09-04										S. Vietnam, prov. Kontum. NW slopes of Ngoc Linh mountain system				Plantae	Tracheophyta	Poales	Poaceae	Liliopsida	P
PRESERVED_SPECIMEN	Anthodon grandiflorus Benth.	SPECIES	BR	64fcb7a8-c14a-460b-914e-4c9156b113a8	BM000617818	Salacia	grandiflorus	Brazil			Named Geo. Feature: Rio Maupés	Richard Spruce					BM		HOLOTYPE				SOUTH_AMERICA	4690981				2017-08-18	2600						NHMUK:ecatalogue:4690981							Plantae	Tracheophyta	Celastrales	Celastraceae	Magnoliopsida	BOT		Celastraceae
PRESERVED_SPECIMEN	Anthonotha lamprophylla (Harms) J.Léonard	SPECIES	CM	http://data.biodiversitydata.nl/naturalis/specimen/L.2035093	L.2035093	Anthonotha	lamprophylla	Cameroon			Kamerun. Bipinde.	Zenker GA		3.083333	10.416667	WGS84	L	1899/01/31 | 1899/01/01	ISOLECTOTYPE	South Region	Breteler FJ	2008-03-03T00:00:00.000+0000	AFRICA	L.2035093																		Plantae	Tracheophyta	Fabales	Fabaceae	Magnoliopsida	Botany	ICN	Plantae|Magnoliopsidae|Fabales|Leguminosae-Caes.
PRESERVED_SPECIMEN	Anthorrhiza stevensii C.R.Huxley & Jebb	SPECIES	PG	http://specimens.kew.org/herbarium/K000761994	K000761994	Anthorrhiza	stevensii	Papua New Guinea	1972	1972-07-20	Side of Mayu River, below Mayu 2, Mt. Suckling. Milne Bay Dist., Raba Raba Subd.	Stevens, P.F.		-9.75	149.07	WGS84	K		ISOTYPE		Huxley, C.R.			K000761994	7	20		2011-09-16	55709	On tree by stream, common, with LAE 55708	Bulbous-based shrub, branches spreading. Height to 40 cm. Tuber brown, with few spines. Leaves dark dull green above, paler below; flowers white; fruit orange.	0.2										Plantae	Tracheophyta	Gentianales	Rubiaceae	Magnoliopsida	Herbarium		RUBIACEAE
PRESERVED_SPECIMEN	Anthoxanthum odoratum L.	SPECIES	EE	TU351001	TU351001	Anthoxanthum	odoratum	Estonia	1976	1976-07-25	Haapsalu rajoon, Laelatu	E. Adov					TU	1976-07-25			E. Adov	1976-07-25T00:00:00.000+0000		TU351001	7	25				habitat: puisniidul							Natural History Museum, University of Tartu		4			Plantae	Tracheophyta	Poales	Poaceae	Liliopsida	TU		Viridiplantae; Anthophyta; Monocotyledonae; Poales; Poaceae; Anthoxanthum
PRESERVED_SPECIMEN	Anthoxanthum odoratum L.	SPECIES	none	http://coldb.mnhn.fr/catalognumber/mnhn/p/p06835237	P06835237	Anthoxanthum	odoratum										P							http://coldb.mnhn.fr/catalognumber/mnhn/p/p06835237				2015-09-05														Plantae	Tracheophyta	Poales	Poaceae	Liliopsida	P
PRESERVED_SPECIMEN	Anthriscus caucalis M.Bieb.	SPECIES	FR	http://coldb.mnhn.fr/catalognumber/mnhn/p/p00039147	P00039147	Anthriscus	caucalis	France	1928	1928-06-21	Paris	s.c.					P			75 Paris				http://coldb.mnhn.fr/catalognumber/mnhn/p/p00039147	6	21	p16	2015-11-06			lisière							Bois de Boulogne lisière s/Neuilly env. du Jardin d'Acclimatation				Plantae	Tracheophyta	Apiales	Apiaceae	Magnoliopsida	P
PRESERVED_SPECIMEN	Anthyllis colorata Juz	SPECIES	RU	TU255475	TU255475	Anthyllis	colorata	Russian Federation	2008	2008-06-19	Irboska	Silvia Pihu		57.72361	27.85556	WGS84	TU	2008-06-19			Egle Köster			TU255475	6	19				habitat: niit							Natural History Museum, University of Tartu		4			Plantae	Tracheophyta	Fabales	Fabaceae	Magnoliopsida	TU		Viridiplantae; Anthophyta; Eudicotyledonae; Fabales; Fabaceae; Anthyllis
PRESERVED_SPECIMEN	Anthyllis vulneraria var. vulneraria	VARIETY	FR	http://coldb.mnhn.fr/catalognumber/mnhn/p/p00618767	P00618767	Anthyllis	vulneraria	France	1947	1947-06-12		Raynal, J.	vulneraria				P			76 Seine-Maritime				http://coldb.mnhn.fr/catalognumber/mnhn/p/p00618767	6	12		2016-09-27										Belbeuf (Seine-Maritime) : les Roches St Adrien				Plantae	Tracheophyta	Fabales	Fabaceae	Magnoliopsida	P
PRESERVED_SPECIMEN	Anthyllis vulneraria var. vulneraria	VARIETY	GB	e328ea93-84d1-43d8-a2d5-27fa222e2e9e	BM001128561	Anthyllis	vulneraria	United Kingdom	1880	1880-01-01		Anon.	vulneraria	50.503601	-4.6525	WGS84	BM			England			EUROPE	2814650					36144						NHMUK:ecatalogue:2814650							Plantae	Tracheophyta	Fabales	Fabaceae	Magnoliopsida	BOT		Fabaceae
PRESERVED_SPECIMEN	Antithamnion cruciatum (C.Agardh) Nägeli	SPECIES	HR	http://data.biodiversitydata.nl/naturalis/specimen/L.4029097	L.4029097	Antithamnion	cruciatum	Croatia			Rovigno	Unknown					L		LECTOTYPE				EUROPE	L.4029097																		Plantae	Rhodophyta	Ceramiales	Ceramiaceae	Florideophyceae	Botany	ICN	Plantae|Algae|Algae
PRESERVED_SPECIMEN	Apiaceae	FAMILY	US	http://www.botanicalcollections.be/specimen/BR0000026835082V	BR0000026835082V			United States	1979	1979-07-01	Emigrant Peak, bij Squaw Valley, California, U.S.A., tussen steengruis, op helling	Hugo Borgoo					BR							http://www.botanicalcollections.be/specimen/BR0000026835082V	7			2017-07-31	7								Meise Botanic Garden					Plantae	Tracheophyta	Apiales	Apiaceae	Magnoliopsida		ICBN
PRESERVED_SPECIMEN	Apocynum androsaemifolium L.	SPECIES	US	http://www.botanicalcollections.be/specimen/BR0000005906659	BR0000005906659	Apocynum	androsaemifolium	United States			White Plains	Clark H.T.					BR	S.D.						http://www.botanicalcollections.be/specimen/BR0000005906659				2012-07-05	S.N.								Meise Botanic Garden					Plantae	Tracheophyta	Gentianales	Apocynaceae	Magnoliopsida		ICBN
PRESERVED_SPECIMEN	Apocynum androsaemifolium L.	SPECIES	US	http://www.botanicalcollections.be/specimen/BR0000005906857	BR0000005906857	Apocynum	androsaemifolium	United States			S.L.	von Schweinitz L.D.					BR	S.D.						http://www.botanicalcollections.be/specimen/BR0000005906857				2012-07-05	S.N.								Meise Botanic Garden					Plantae	Tracheophyta	Gentianales	Apocynaceae	Magnoliopsida		ICBN
PRESERVED_SPECIMEN	Apocynum cannabinum L.	SPECIES	US	http://www.botanicalcollections.be/specimen/BR0000005906826	BR0000005906826	Apocynum	cannabinum	United States			New York	Gray A.					BR	S.D.						http://www.botanicalcollections.be/specimen/BR0000005906826				2012-07-05	S.N.								Meise Botanic Garden					Plantae	Tracheophyta	Gentianales	Apocynaceae	Magnoliopsida		ICBN
PRESERVED_SPECIMEN	Apocynum cannabinum L.	SPECIES	US	http://www.botanicalcollections.be/specimen/BR0000005907694	BR0000005907694	Apocynum	cannabinum	United States			White Plains	Clark H.T.					BR	S.D.						http://www.botanicalcollections.be/specimen/BR0000005907694				2012-07-05	S.N.								Meise Botanic Garden					Plantae	Tracheophyta	Gentianales	Apocynaceae	Magnoliopsida		ICBN
PRESERVED_SPECIMEN	Apodocephala radula Humbert	SPECIES	MG	http://data.biodiversitydata.nl/naturalis/specimen/WAG0000507	WAG0000507	Apodocephala	radula	Madagascar	1947	1947-03-27	Madagascar. Bassin de la Manampanihy (sud-est), rochers du sommet Mont Vohimavo au nord d'Ampasimena.	Humbert J-H					L	1947/03/27	ISOTYPE	Toliara (Tulear)			AFRICA	WAG0000507	3	27																Plantae	Tracheophyta	Asterales	Asteraceae	Magnoliopsida	Botany	ICN	Plantae|Magnoliopsidae|Asterales|Compositae
PRESERVED_SPECIMEN	Apostasia nuda R.Br.	SPECIES	ID	http://data.biodiversitydata.nl/naturalis/specimen/L.1533936	L.1533936	Apostasia	nuda	Indonesia			Sumatra.	Korthals PW					L			Sumatra			ASIA	L.1533936																		Plantae	Tracheophyta	Asparagales	Orchidaceae	Liliopsida	Botany	ICN	Plantae|Magnoliopsidae|Asparagales|Orchidaceae
PRESERVED_SPECIMEN	Aquilegia L.	GENUS	US	http://www.botanicalcollections.be/specimen/BR0000026834979V	BR0000026834979V	Aquilegia		United States	1979	1979-07-01	Emerald Bay, Lake Tahoe, California U.S.A., vochtige helling met afstromend water	Hugo Borgoo					BR							http://www.botanicalcollections.be/specimen/BR0000026834979V	7			2017-08-11	2								Meise Botanic Garden					Plantae	Tracheophyta	Ranunculales	Ranunculaceae	Magnoliopsida		ICBN
PRESERVED_SPECIMEN	Arabis alpina L.	SPECIES	none	http://coldb.mnhn.fr/catalognumber/mnhn/p/p04657887	P04657887	Arabis	alpina										P							http://coldb.mnhn.fr/catalognumber/mnhn/p/p04657887				2015-09-05														Plantae	Tracheophyta	Brassicales	Brassicaceae	Magnoliopsida	P
PRESERVED_SPECIMEN	Arachis hoehnei Krapov. & W.C.Greg.	SPECIES	BR	http://specimens.kew.org/herbarium/K000731378	K000731378	Arachis	hoehnei	Brazil	1976	1976-12-06	Baia vermelha, Fazenda Santa Teresa	Krapovickas, A.; Gregory, W.C.		-18.25	-57.47	WGS84	K							K000731378	12	6		2012-04-12	30006													Plantae	Tracheophyta	Fabales	Fabaceae	Magnoliopsida	Herbarium		LEGUMINOSAE-PAPILIONOIDEAE
PRESERVED_SPECIMEN	Arachniodes aristata	species	AU	http://id.luomus.fi/EIG.1344	EIG.1344	Arachniodes	aristata	Australia	1976	1976-10-04	O'Sullivan's Gap, 10 km NE of Bulahdelah					Dms	H	04.10.1976		New South Wales			Australia and Oceania	http://tun.fi/MY.692194	10	4		1492083477	8473						H1225413	http://tun.fi/HR.168	Luomus, University of Eastern Finland	O'Sullivan's Gap, 10 km NE. of Bulahdelah. N.S.W.	GX.231	32°20'S 152°16'E (degrees, minutes)
PRESERVED_SPECIMEN	Arachniodes aristata	species	AU	http://id.luomus.fi/EIG.1345	EIG.1345	Arachniodes	aristata	Australia	1976	1976-10-04	O'Sullivan's Gap, 10 km northeast of Bulahdelah					Dms	H	04.10.1976		New South Wales			Australia and Oceania	http://tun.fi/MY.692227	10	4		1492083477	8473						H1225412	http://tun.fi/HR.168	Luomus, University of Eastern Finland	O'Sullivan's Gap, 10 km NE. of Bulahdelah	GX.2951	32°20'S 152°16'E (degrees, minutes)
PRESERVED_SPECIMEN	Arachniodes aristata	species	AU	http://id.luomus.fi/EIG.1346	EIG.1346	Arachniodes	aristata	Australia	1977	1977-11-28	Bangalow Creek, O'Sullivan's Gap					Dms	H	28.11.1977		New South Wales			Australia and Oceania	http://tun.fi/MY.692260	11	28		1492083478	9868						H1225422	http://tun.fi/HR.168	Luomus, University of Eastern Finland		GX.270	32°20'S 152°16'E (degrees, minutes)
PRESERVED_SPECIMEN	Arachniodes aristata	species	AU	http://id.luomus.fi/EIG.1349	EIG.1349	Arachniodes	aristata	Australia	1969	1969-08-03	Dingo state forest, northwest of Big Run creek, Wherrol Flat (circa 29 km northwest of Wingham)					Dms	H	03.08.1969		New South Wales			Australia and Oceania	http://tun.fi/MY.692359	8	3		1492083479	1904						H1225832	http://tun.fi/HR.168	Luomus, University of Eastern Finland	Dingo State Forest, NW. of Big Run Creek, Wherrol Flat (c. 29 km NW. of Wingham). Alt c. 750 m	GX.2951	c.31° 44'S c.152° 12'E (degrees, minutes)
PRESERVED_SPECIMEN	Arachniodes aristata	species	CN	http://id.luomus.fi/EIG.1261	EIG.1261	Arachniodes	aristata	China	1987	1987-07-15	Hoping hsiang, trail from Ku-Kuan to Mount Po Jing Cha, south-east slopes	Stenroos, Soili					H	15.07.1987		Taiwan			Asia	http://tun.fi/MY.689458	7	15	Taichung	1492083429	3574						H1658533	http://tun.fi/HR.168	Luomus, University of Eastern Finland	Taichung Co.: Hoping-hsiang, trail from Ku-Kuan to Mt. Po Jing Cha, S-E slopes, alt. ca. 800-850 m.	GX.231
PRESERVED_SPECIMEN	Arachniodes aristata	species	CN	http://id.luomus.fi/EIG.1262	EIG.1262	Arachniodes	aristata	China	1987	1987-07-01	Hoping hsiang, Ta-huseh-shan forest recreation area, 35 km from Tungshih, trail from the entrance to forest recreation area to Mount Saolai.	Hyvönen, Jaakko					H	01.07.1987		Taiwan			Asia	http://tun.fi/MY.689491	7	1	Taichung	1492083430	4186						H1658534	http://tun.fi/HR.168	Luomus, University of Eastern Finland	Taichung Co.: Hoping-hsiang, Ta-huseh-shan forest recreation area, 35 km from Tungshih, trail from the entrance to forest recreation area to Mt. Saolai, alt. ca. 2100-2200 m.	GX.270
PRESERVED_SPECIMEN	Arachniodes quadripinnata	species	CN	http://id.luomus.fi/EIG.1441	EIG.1441	Arachniodes	quadripinnata	China	1987	1987-12-01	Hoping hsiang, Ta-hsueh Shan forest recreation area.	Hyvönen, Jaakko					H	01.12.1987		Taiwan			Asia	http://tun.fi/MY.695410	12	1	Taichung	1492083541	4196						H1658531	http://tun.fi/HR.168	Luomus, University of Eastern Finland	Taichung Co.: Hoping-hsiang, Ta-huseh-shan forest recreation area, 35 km from Tungshih, trail from entrance to forest recreation area to Mt. Saolai alt. ca. 2 000 m	GX.2951
PRESERVED_SPECIMEN	Arachniodes quadripinnata	species	CN	http://id.luomus.fi/EIG.1442	EIG.1442	Arachniodes	quadripinnata	China	1979	1979-02-15	Tawushan	Yang, H. N.					H	15.02.1979		Taiwan			Asia	http://tun.fi/MY.695443	2	15	Taitung	1492083542							H1228046	http://tun.fi/HR.168	Luomus, University of Eastern Finland		GX.2951
PRESERVED_SPECIMEN	Aralia spinosa L.	SPECIES	US	http://www.botanicalcollections.be/specimen/BR0000005786909	BR0000005786909	Aralia	spinosa	United States			S.L.	von Schweinitz L.D.					BR	S.D.						http://www.botanicalcollections.be/specimen/BR0000005786909				2011-11-22	S.N.								Meise Botanic Garden					Plantae	Tracheophyta	Apiales	Araliaceae	Magnoliopsida		ICBN
PRESERVED_SPECIMEN	Aralia urticifolia Blume ex Miq.	SPECIES	ID	http://data.biodiversitydata.nl/naturalis/specimen/L.2571799	L.2571799	Aralia	urticifolia	Indonesia	1904	1904-10-24	Indonesia, Jawa Barat, Gunung Papandayan	Hochreutiner BPG					L	1904/10/24		Java	Wen J		ASIA	L.2571799	10	24																Plantae	Tracheophyta	Apiales	Araliaceae	Magnoliopsida	Botany	ICN	Plantae|Magnoliopsidae|Apiales|Araliaceae
PRESERVED_SPECIMEN	Archidendron triplinervium (Kosterm.) I.C.Nielsen	SPECIES	ID	http://data.biodiversitydata.nl/naturalis/specimen/L.1934962	L.1934962	Archidendron	triplinervium	Indonesia	1994	1994-04-28	Sintang, km 86	Church AC; Mahyar UW; Indah; Ismail; Hamzah					L	1994/04/28		Borneo	Paoli G	1994-06-01T00:00:00.000+0000	ASIA	L.1934962	4	28																Plantae	Tracheophyta	Fabales	Fabaceae	Magnoliopsida	Botany	ICN	Plantae|Magnoliopsidae|Fabales|Leguminosae-Mim.
PRESERVED_SPECIMEN	Ardisia eugeniifolia Wall. ex A.DC.	SPECIES	none	http://coldb.mnhn.fr/catalognumber/mnhn/p/p05285547	P05285547	Sadiria	eugeniifolia										P							http://coldb.mnhn.fr/catalognumber/mnhn/p/p05285547				2015-09-04														Plantae	Tracheophyta	Ericales	Primulaceae	Magnoliopsida	P
PRESERVED_SPECIMEN	Ardisia photinifolia C.M.Hu	SPECIES	ID	http://data.biodiversitydata.nl/naturalis/specimen/L%20%200062785	L 0062785	Ardisia	photinifolia	Indonesia	1988	1988-12-01	Sumatera Utara, Kabupaten Tapanulli Utare Tele, road junction to Panguruan on high bank of Danau Toba.	Kessler PJA		2.583333	98.716667	WGS84	L	1988/12/01	ISOTYPE	Sumatra	Hu CM	1998-02-01T00:00:00.000+0000	ASIA	L 0062785	12	1																Plantae	Tracheophyta	Ericales	Primulaceae	Magnoliopsida	Botany	ICN	Plantae|Magnoliopsidae|Ericales|Myrsinaceae
PRESERVED_SPECIMEN	Arenaria pseudostellaria C.Y.Wu, Lihua Zhou & W.L.Wagner	SPECIES	none	http://coldb.mnhn.fr/catalognumber/mnhn/p/p05142947	P05142947	Odontostemma	pseudostellaria										P							http://coldb.mnhn.fr/catalognumber/mnhn/p/p05142947				2015-09-05														Plantae	Tracheophyta	Caryophyllales	Caryophyllaceae	Magnoliopsida	P
PRESERVED_SPECIMEN	Argostemma timorense Benn.	SPECIES	PH	http://data.biodiversitydata.nl/naturalis/specimen/L%20%200000129	L 0000129	Argostemma	timorense	Philippines			Los Banos (Mt. Maquiling) Province of Laguna, Luzon Philippines	Elmer ADE					L	1917/06/30 | 1917/06/01	ISOTYPE	Luzon	; Bakhuizen van den Brink Jr RC	1951-10-01T00:00:00.000+0000	ASIA	L 0000129																		Plantae	Tracheophyta	Gentianales	Rubiaceae	Magnoliopsida	Botany	ICN	Plantae|Magnoliopsidae|Gentianales|Rubiaceae
PRESERVED_SPECIMEN	Aristida lanuginosa Scribn. ex Hitchc.	SPECIES	MX	http://coldb.mnhn.fr/catalognumber/mnhn/p/p00642147	P00642147	Aristida	lanuginosa	Mexico	1889	1889-10-28		Pringle, C.G.					P		TYPE		Longhi-Wagner			http://coldb.mnhn.fr/catalognumber/mnhn/p/p00642147	10	28		2012-10-15										State of Jalisco, Hills near Guadalajara.				Plantae	Tracheophyta	Poales	Poaceae	Liliopsida	P
PRESERVED_SPECIMEN	Artemisia dracunculus L.	SPECIES	EE	TU300194	TU300194	Artemisia	dracunculus	Estonia	1956	1956-08-08	Räpina raj., Piusa-Veski raudteejaama vahel põhjapoolsel raudtee tammil, Orava teest 0,5 km Piusa jaama poole	E. Lellep					TU	1956-08-08			E. Lellep	1956-08-08T00:00:00.000+0000		TU300194	8	8											Natural History Museum, University of Tartu		4			Plantae	Tracheophyta	Asterales	Asteraceae	Magnoliopsida	TU		Viridiplantae; Anthophyta; Eudicotyledonae; Asterales; Asteraceae; Artemisia
PRESERVED_SPECIMEN	Artemisia norvegica Fries	SPECIES	GB	http://data.rbge.org.uk/herb/E00668525	E00668525	Artemisia	norvegica	United Kingdom	2012	2012-07-30	Cul Mor	Barnard, Kate					E	2012-07-30		Scotland				http://data.rbge.org.uk/herb/E00668525	7	30	(VC 105) West Ross	2015-07-22	2					730 M	BGBASE:645999	http://biocol.org/urn:lsid:biocol.org:col:15670						Plantae	Tracheophyta	Asterales	Asteraceae	Magnoliopsida	E	ICBN
PRESERVED_SPECIMEN	Artemisia vulgaris L.	SPECIES	EE	TU304800	TU304800	Artemisia	vulgaris	Estonia	1977	1977-06-25	Võru, Kõrgula koolist 200 m lõunasse	J. Jaagus					TU	1977-06-25			J. Jaagus	1977-06-25T00:00:00.000+0000		TU304800	6	25				habitat: kruusaauk							Natural History Museum, University of Tartu		4			Plantae	Tracheophyta	Asterales	Asteraceae	Magnoliopsida	TU		Viridiplantae; Anthophyta; Eudicotyledonae; Asterales; Asteraceae; Artemisia
PRESERVED_SPECIMEN	Artemisia vulgaris L.	SPECIES	EE	TU304825	TU304825	Artemisia	vulgaris	Estonia	1970	1970-08-23							TU	1970-08-23				1970-08-23T00:00:00.000+0000		TU304825	8	23											Natural History Museum, University of Tartu		4			Plantae	Tracheophyta	Asterales	Asteraceae	Magnoliopsida	TU		Viridiplantae; Anthophyta; Eudicotyledonae; Asterales; Asteraceae; Artemisia
PRESERVED_SPECIMEN	Arthonia cohabitans Coppins	SPECIES	GB	http://data.rbge.org.uk/herb/E00455012	E00455012	Arthonia	cohabitans	United Kingdom	1980	1980-08-06	Seil: Ballachuan, wood south of Port Mor	B J Coppins					E	1980-08-06	PARATYPE	Scotland				http://data.rbge.org.uk/herb/E00455012	8	6	(VC 98) Argyll	2015-11-11	8128					0-30 M	BGBASE:465178	http://biocol.org/urn:lsid:biocol.org:col:15670						Fungi	Ascomycota	Arthoniales	Arthoniaceae	Arthoniomycetes	E	ICBN
PRESERVED_SPECIMEN	Arthropteris anniana	species	ET	http://id.luomus.fi/EIG.6734	EIG.6734	Arthropteris	anniana	Ethiopia	1982	1982-11-01	10 km of Bedele on road to Metu	Kukkonen, Ilkka				Dms	H	01.11.1982		Oromia			Africa	http://tun.fi/MY.724722	11	1	Illubabor	1492084154	12477						H1489717	http://tun.fi/HR.168	Luomus, University of Eastern Finland	Ilubabor Adm. Reg. C. 1900 m.	GX.231	08°31'N; 36°23'E (degrees, minutes)
PRESERVED_SPECIMEN	Arthropteris beckleri	species	AU	http://id.luomus.fi/EIG.6741	EIG.6741	Arthropteris	beckleri	Australia	1977	1977-05-05	Bilambil Creek, 4,9 km SW of Bilambil Heights	Coveny, R.				Dms	H	05.05.1977		New South Wales			Australia and Oceania	http://tun.fi/MY.724746	5	5		1492084154	9418						H1225843	http://tun.fi/HR.168	Luomus, University of Eastern Finland	Bilambil P.O. Alt. 100 m.	GX.231	28°16'S 153°14'E (degrees, minutes)
PRESERVED_SPECIMEN	Arthropteris beckleri	species	AU	http://id.luomus.fi/EIG.6742	EIG.6742	Arthropteris	beckleri	Australia	1955	1955-01-21	Kiama, Saddleback Mountain	Constable, E. F.					H	21.01.1955		New South Wales			Australia and Oceania	http://tun.fi/MY.724749	1	21	Illawarra	1492084154							H1225831	http://tun.fi/HR.168	Luomus, University of Eastern Finland	Altitude 495 m.	GX.270
PRESERVED_SPECIMEN	Arthropteris beckleri	species	AU	http://id.luomus.fi/EIG.6743	EIG.6743	Arthropteris	beckleri	Australia	1962	1962-06-06	Killen Falls, Emigrant Creek, 5 miles SW of Bangalow	Constable, E. F.					H	06.06.1962		New South Wales			Australia and Oceania	http://tun.fi/MY.724752	6	6	Tintenbar	1492084154							H1225829	http://tun.fi/HR.168	Luomus, University of Eastern Finland		GX.270
PRESERVED_SPECIMEN	Arthropteris palisotii	species	AU	http://id.luomus.fi/EIG.6759	EIG.6759	Arthropteris	palisotii	Australia	1981	1981-09-10	Bellenden Ker National Park, W. of Babinda. The Boulders.	Kukkonen, Ilkka					H	10.09.1981		Queensland			Australia and Oceania	http://tun.fi/MY.724803	9	10		1492084155	10882						H1459261	http://tun.fi/HR.168	Luomus, University of Eastern Finland		GX.231
PRESERVED_SPECIMEN	Arthropteris palisotii (Desv.) Alston	SPECIES	ID	http://data.biodiversitydata.nl/naturalis/specimen/L.3501764	L.3501764	Arthropteris	palisotii	Indonesia	1913	1913-09-07	Kampong Goudang, Mt. Toengungan.	Mousset JP		-7.216667	110.7	WGS84	L	1913/09/07		Java	Hovenkamp PH	2013-03-01T00:00:00.000+0000	ASIA	L.3501764	9	7																Plantae	Tracheophyta	Polypodiales	Tectariaceae	Polypodiopsida	Botany	ICN	Plantae|Pteropsida|Polypodiales|Arthropteridaceae
PRESERVED_SPECIMEN	Arthropteris tenella	species	AU	http://id.luomus.fi/EIG.6762	EIG.6762	Arthropteris	tenella	Australia	1977	1977-03-15	Below Govetts Leap					Dms	H	15.03.1977		New South Wales			Australia and Oceania	http://tun.fi/MY.724815	3	15	Blackheath	1492084155	9186						H1225834	http://tun.fi/HR.168	Luomus, University of Eastern Finland		GX.231	33°38´S 150° 19´E (degrees, minutes)
PRESERVED_SPECIMEN	Arthropteris tenella	species	AU	http://id.luomus.fi/EIG.6763	EIG.6763	Arthropteris	tenella	Australia	1981	1981-09-13	Atherton Tableland, Lamin's Hill, E. of Malanda	Kukkonen, Ilkka					H	13.09.1981		Queensland			Australia and Oceania	http://tun.fi/MY.724818	9	13		1492084155	11003						H1459190	http://tun.fi/HR.168	Luomus, University of Eastern Finland		GX.231
PRESERVED_SPECIMEN	Arundo donax L.	SPECIES	CN	http://data.rbge.org.uk/herb/E00088095	E00088095	Arundo	donax	China	1996	1996-03-10		Liu, Zheng-yu		29	107	WGS84	E	1996-03-10		Sichuan Province				http://data.rbge.org.uk/herb/E00088095	3	10	Nanchuan	2012-08-02	15306					680 M	BGBASE:98356	http://biocol.org/urn:lsid:biocol.org:col:15670						Plantae	Tracheophyta	Poales	Poaceae	Liliopsida	E	ICBN
PRESERVED_SPECIMEN	Aspicilia tibetica Sohrabi & Owe-Larss.	species	CN	http://id.luomus.fi/HA.H9503468	HA.H9503468	Aspicilia	tibetica	CN	1994	1994-07-18		Obermayer, W.					H		Isotype	Xizang (Tibet)	Sohrabi, Mohammad	2008	Asia temperate	http://id.luomus.fi/MY.5310937	7	18		1530276606	04386-duplum	Kobresia-meadows and slopes covered with rock debris, on soil, plant remnants.	Sino-German joint expedition on environmental and climatic changes and mountain hazards in southeast- and east-Tibet 1994.			5100-5300	H9503468	http://tun.fi/HR.85		China, Tibet, prov. Xizang, Himalaya Range, 135 km of Lhasa, SSE of Pomo Tso (= Puma Yumco), near the pass into the Kuru valley, way from the pass-road to the glacier.	GX.22	28°28' N, 90°37' E	Sohrabi & Owe-Larss.
PRESERVED_SPECIMEN	Aspidosperma nitidum Benth.	SPECIES	BR	http://specimens.kew.org/herbarium/K000988576	K000988576	Aspidosperma	nitidum	Brazil	1943	1943-06-23	Bosque Municipal.	Ducke, A.					K							K000988576	6	23		2015-01-22	1263	Data not transcribed.	Data not transcribed.											Plantae	Tracheophyta	Gentianales	Apocynaceae	Magnoliopsida	Herbarium		APOCYNACEAE
PRESERVED_SPECIMEN	Asplenium abyssinicum	species	ET	http://id.luomus.fi/EIG.7053	EIG.7053	Asplenium	abyssinicum	Ethiopia	1972	1972-01-30	Simien Mountains National Park, Geech. On the banks of Djinn Bahr.	Heinonen, Kirsti					H	30.01.1972		Begember			Africa	http://tun.fi/MY.725775	1	30		1492084175	1061						H1074231	http://tun.fi/HR.168	Luomus, University of Eastern Finland	Begemder, Simien National Park. 3400 m above sea.	GX.270
PRESERVED_SPECIMEN	Asplenium abyssinicum	species	ET	http://id.luomus.fi/EIG.7060	EIG.7060	Asplenium	abyssinicum	Ethiopia	1982	1982-10-29/1982-10-30		Kukkonen, Ilkka				Dms	H	29/30.10.1982					Africa	http://tun.fi/MY.725799	10		Nekemte, East Welega	1492084175	12436						H1489456	http://tun.fi/HR.168	Luomus, University of Eastern Finland	Welega Adm. Reg., Nekemte, on eastern side of town, along track near the main water purification plant. c. 2160 m.	GX.2951	09°05’ N 36°33’E (degrees, minutes)
PRESERVED_SPECIMEN	Asplenium abyssinicum	species	ET	http://id.luomus.fi/EIG.7061	EIG.7061	Asplenium	abyssinicum	Ethiopia	1982	1982-10-28	Amarti Valley, c. 20 km along road from Fincha to Shambu	Kukkonen, Ilkka					H	28.10.1982		Oromia			Africa	http://tun.fi/MY.725802	10	28		1492084175	12414						H1489461	http://tun.fi/HR.168	Luomus, University of Eastern Finland	Welega Adm. Reg., c. 2750 m.	GX.2951
PRESERVED_SPECIMEN	Asplenium adiantum-nigrum subsp. adiantum-nigrum	species	ET	http://id.luomus.fi/EIG.7145	EIG.7145	Asplenium	adiantum-nigrum	Ethiopia	1982	1982-10-25	Mount Wechecha, Menagesha State Forest, c. 20 km W of Addis Abeba; on southwestern flank of the mountain in forest	Kukkonen, Ilkka				Dms	H	25.10.1982		West Shewa Zone			Africa	http://tun.fi/MY.726081	10	25		1492084181	12355						H1472404	http://tun.fi/HR.168	Luomus, University of Eastern Finland	Shewa Adm. Reg., Mt. Wechecha. 2600 m.	GX.231	09°00'N; 38°33'E (degrees, minutes)
PRESERVED_SPECIMEN	Asplenium adiantum-nigrum subsp. adiantum-nigrum	species	ET	http://id.luomus.fi/EIG.7147	EIG.7147	Asplenium	adiantum-nigrum	Ethiopia	1982	1982-10-28	West Shewa, Finicha, c. 3 km W of the town	Kukkonen, Ilkka				Dms	H	28.10.1982					Africa	http://tun.fi/MY.726087	10	28		1492084181	12400						H1489466	http://tun.fi/HR.168	Luomus, University of Eastern Finland	Welega Adm. Reg, Fincha. 2000 m.	GX.231	09°14'N; 37°20'E (degrees, minutes)
PRESERVED_SPECIMEN	Asplenium adiantum-nigrum subsp. adiantum-nigrum	species	ET	http://id.luomus.fi/EIG.7151	EIG.7151	Asplenium	adiantum-nigrum	Ethiopia	1982	1982-11-08	Bale Zone, Sanetti Plateau and Mount Batu	Kukkonen, Ilkka				Dms	H	08.11.1982		Oromia Region			Africa	http://tun.fi/MY.726102	11	8		1492084182	12612						H1489737	http://tun.fi/HR.168	Luomus, University of Eastern Finland	Bale Adm. Reg., Saneti plateau. 4000-4200 m	GX.2951	06°55'N; 39°40'E (degrees, minutes)
PRESERVED_SPECIMEN	Asplenium adiantum-nigrum subsp. adiantum-nigrum	species	ET	http://id.luomus.fi/EIG.7155	EIG.7155	Asplenium	adiantum-nigrum	Ethiopia	1982	1982-11-01	Illubabor Zone, 10 km W of Bedele on road to Metu, open woodland along a river	Kukkonen, Ilkka				Dms	H	01.11.1982					Africa	http://tun.fi/MY.726114	11	1		1492084182	12486						H1489720	http://tun.fi/HR.168	Luomus, University of Eastern Finland	Ilubabor Adm. Reg. 1900 m.	GX.231	08°31'N; 36°23'E (degrees, minutes)
PRESERVED_SPECIMEN	Asplenium adiantum-nigrum subsp. adiantum-nigrum	Ssp	ET	http://id.luomus.fi/EIG.7234	EIG.7234	Asplenium	adiantum-nigrum	Ethiopia	1982	1982-11-08	Sanetti Plateau and Mount Batu, on foot of the highest point of Mt. Batu	Kukkonen, Ilkka	adiantum-nigrum			Dms	H	08.11.1982		Oromia			Africa	http://tun.fi/MY.726378	11	8	Bale	1492084187	12603A						H1489741	http://tun.fi/HR.168	Luomus, University of Eastern Finland	Saneti Plateau. Alt. c. 4000-4200 m	GX.231	06°55'N; 39°40'E (degrees, minutes)
PRESERVED_SPECIMEN	Asplenium adiantum-nigrum subsp. adiantum-nigrum	Ssp	ET	http://id.luomus.fi/EIG.7240	EIG.7240	Asplenium	adiantum-nigrum	Ethiopia	1982	1982-11-08	Sanetti Plateau and Mount Batu, on foot of the highest point of Mount Batu	Kukkonen, Ilkka	adiantum-nigrum			Dms	H	08.11.1982		Oromia			Africa	http://tun.fi/MY.726399	11	8	Bale	1492084188	12603 A						H1489742	http://tun.fi/HR.168	Luomus, University of Eastern Finland	Bale Adm. Reg.; Saneti plateau, alt. c. 4100 m	GX.270	06°55'N; 39°40'E (degrees, minutes)
PRESERVED_SPECIMEN	Asplenium adiantum-nigrum L.	SPECIES	GB	http://data.rbge.org.uk/herb/E00146845	E00146845	Asplenium	adiantum-nigrum	United Kingdom	1983	1983-11-04							E	1983-11-04		Scotland				http://data.rbge.org.uk/herb/E00146845	11	4	(VC 88) Mid Perthshire	2013-11-25							BGBASE:171220	http://biocol.org/urn:lsid:biocol.org:col:15670						Plantae	Tracheophyta	Polypodiales	Aspleniaceae	Polypodiopsida	E	ICBN
PRESERVED_SPECIMEN	Asplenium auriculatum	species	BR	http://id.luomus.fi/EIG.7263	EIG.7263	Asplenium	auriculatum	Brazil	1873	1873-09-20		Mosén					H	20.09.1873		Southeast Region			Central America, South America and the Antarctic	http://tun.fi/MY.726471	9	20	Caldas, Minas Gerais	1492084189							H1128431	http://tun.fi/HR.168	Luomus, University of Eastern Finland	Minas Geraes	GX.2951
PRESERVED_SPECIMEN	Asplenium auritum	species	BR	http://id.luomus.fi/EIG.7273	EIG.7273	Asplenium	auritum	Brazil	1928	1928-03-17	Mantiqueira Mountains	Pohjakallio, K. A.					H	17.03.1928		Southeast Region			Central America, South America and the Antarctic	http://tun.fi/MY.726504	3	17	Itatiaya, Rio de Janeiro	1492084190							H1568217	http://tun.fi/HR.168	Luomus, University of Eastern Finland	Serra da Mantiqueina; 960 s. m.	GX.2951
PRESERVED_SPECIMEN	Asplenium australasicum	species	AU	http://id.luomus.fi/EIG.7281	EIG.7281	Asplenium	australasicum	Australia	1981	1981-09-07	Mossman Gorge. National Park between Mossman and Daintree.	Kukkonen, Ilkka					H	07.09.1981		Queensland			Australia and Oceania	http://tun.fi/MY.726531	9	7	Far North Queensland	1492084190	10840						H1459105	http://tun.fi/HR.168	Luomus, University of Eastern Finland		GX.2951
PRESERVED_SPECIMEN	Asplenium bulbiferum	species	AU	http://id.luomus.fi/EIG.7294	EIG.7294	Asplenium	bulbiferum	Australia	1981	1981-09-01	Mount Wellington. Track to Bett’s Falls	Kukkonen, Ilkka					H	01.09.1981		Tasmania			Australia and Oceania	http://tun.fi/MY.726573	9	1	Hobart	1492084191	10681						H1460652	http://tun.fi/HR.168	Luomus, University of Eastern Finland	Alt. c. 1700 ’	GX.2951
PRESERVED_SPECIMEN	Asplenium bullatum	species	CN	http://id.luomus.fi/EIG.7313	EIG.7313	Asplenium	bullatum	China	1979	1979-02-14	Peitawushan	Yang, H. N.					H	14.02.1979		Taiwan			Asia	http://tun.fi/MY.726639	2	14	Taitung	1492084192							H1228026	http://tun.fi/HR.168	Luomus, University of Eastern Finland	Taitung Co.	GX.231
PRESERVED_SPECIMEN	Asplenium caudatum Forst.	SPECIES	ID	http://data.biodiversitydata.nl/naturalis/specimen/L.3973960	L.3973960	Asplenium	caudatum	Indonesia	1972	1972-08-10	Gunung Ketambe and vicinity, 8-15 km SW from the mouth of Lau Ketambe.	Wilde WJJO de; Wilde-Duyfjes BEE de					L	1972/08/10		Sumatra			ASIA	L.3973960	8	10																Plantae	Tracheophyta	Polypodiales	Aspleniaceae	Polypodiopsida	Botany	ICN	Plantae|Pteropsida|Polypodiales|Aspleniaceae
PRESERVED_SPECIMEN	Asplenium claussenii	species	BR	http://id.luomus.fi/EIG.7341	EIG.7341	Asplenium	claussenii	Brazil	1990	1990-02-13	Recanto Botuquara						H	13.02.1990		Parana			Central America, South America and the Antarctic	http://tun.fi/MY.726729	2	13	Ponta Grossa	1492084194	3213						H1677760	http://tun.fi/HR.168	Luomus, University of Eastern Finland		GX.270
PRESERVED_SPECIMEN	Asplenium demerkense	species	ET	http://id.luomus.fi/EIG.7443	EIG.7443	Asplenium	demerkense	Ethiopia	1972	1972-01-30	Simien National Park, Geech. On the banks of the tributary of Djinn Bahr.	Heinonen, Kirsti					H	30.01.1972		Amhara			Africa	http://tun.fi/MY.727059	1	30	North Gondar	1492084201	1067						H1074243	http://tun.fi/HR.168	Luomus, University of Eastern Finland	Begemder. 3600 m above sea	GX.270
PRESERVED_SPECIMEN	Asplenium divergens	species	BR	http://id.luomus.fi/EIG.7449	EIG.7449	Asplenium	divergens	Brazil	1993	1993-07-21	Volta Grande						H	21.07.1993		Paraná			Central America, South America and the Antarctic	http://tun.fi/MY.727077	7	21	Lapa	1492084201	1263						H1677691	http://tun.fi/HR.168	Luomus, University of Eastern Finland	Volta Grande (mun. Lapa) Parana	GX.231
PRESERVED_SPECIMEN	Asplenium diversifolium	species	ID	http://id.luomus.fi/EIG.7451	EIG.7451	Asplenium	diversifolium	Indonesia	1910	1910-02-01/1910-02-28	Pogal[?]	Mousset, J. P.					H	02.1910		Java			Asia	http://tun.fi/MY.727086	2			1492084201							H1591098	http://tun.fi/HR.168	Luomus, University of Eastern Finland	300 m	GX.231
PRESERVED_SPECIMEN	Asplenium filare	species	ET	http://id.luomus.fi/EIG.7494	EIG.7494	Asplenium	filare	Ethiopia	1965	1965-11-02	Near the Portuguese Bridge, near Debre-Libanos, 80 km NW of Addis Ababa	de Wilde, W.					H	02.11.1965		Oromia			Africa	http://tun.fi/MY.727227	11	2	Semien Shewa	1492084204	8639						H1084217	http://tun.fi/HR.168	Luomus, University of Eastern Finland	alt. 2400 m	GX.270
PRESERVED_SPECIMEN	Asplenium flaccidum	species	AU	http://id.luomus.fi/EIG.7613	EIG.7613	Asplenium	flaccidum	Australia	1981	1981-08-31	Mount Field National Park. Russell Falls	Kukkonen, Ilkka					H	31.08.1981		Tasmania			Australia and Oceania	http://tun.fi/MY.727626	8	31		1492084213	10683A						H1460757	http://tun.fi/HR.168	Luomus, University of Eastern Finland	Mt. Field National Park. E side of the mountain. Alt. c. 200 m.	GX.2951
PRESERVED_SPECIMEN	Asplenium harpeodes	species	BR	http://id.luomus.fi/EIG.7565	EIG.7565	Asplenium	harpeodes	Brazil	1928	1928-04-06	Mantiqueira Mountains, Itatiaia	Lahtivirta, K. I.					H	06.04.1928		Southeast Region			Central America, South America and the Antarctic	http://tun.fi/MY.727464	4	6		1492084210							H1568230	http://tun.fi/HR.168	Luomus, University of Eastern Finland	Serra de Mantiqueira, Itatiaya; Walter, ca 1000 m. s.m.	GX.270
PRESERVED_SPECIMEN	Asplenium harpeodes	species	BR	http://id.luomus.fi/EIG.7566	EIG.7566	Asplenium	harpeodes	Brazil	1928	1928-04-06	Mantiqueira Mountains, Itatiaia	Lahtivirta, K. I.					H	06.04.1928		Southeast Region			Central America, South America and the Antarctic	http://tun.fi/MY.727467	4	6		1492084210							H1568229	http://tun.fi/HR.168	Luomus, University of Eastern Finland	Serra de Mantiqueira, Itatiaya; Walter, ca 1000 m. s.m.	GX.270
PRESERVED_SPECIMEN	Asplenium harpeodes	species	BR	http://id.luomus.fi/EIG.7567	EIG.7567	Asplenium	harpeodes	Brazil	1928	1928-04-06	Mantiqueira Mountains, Itatiaia	Lahtivirta, K. I.					H	06.04.1928		Southeast Region			Central America, South America and the Antarctic	http://tun.fi/MY.727470	4	6		1492084210							H1568228	http://tun.fi/HR.168	Luomus, University of Eastern Finland	Serra de Mantiqueira, Itatiaya; Walter, ca 1000 m. s.m.	GX.231
PRESERVED_SPECIMEN	Asplenium kunzeanum	species	BR	http://id.luomus.fi/EIG.7696	EIG.7696	Asplenium	kunzeanum	Brazil	1928	1928-04-05	Mantiqueira Mountains, Itatlaya, Walter	Lahtivirta, K. I.					H	05.04.1928		Southeast			Central America, South America and the Antarctic	http://tun.fi/MY.727899	4	5		1492084218							H1568227	http://tun.fi/HR.168	Luomus, University of Eastern Finland	Serra da Mantiqueira, ca 1000 m. s.m.	GX.231
PRESERVED_SPECIMEN	Asplenium kunzeanum	species	BR	http://id.luomus.fi/EIG.7701	EIG.7701	Asplenium	kunzeanum	Brazil	1943	1943-01-25		Reitz, R.					H	25.01.1943		Santa Catarina			Central America, South America and the Antarctic	http://tun.fi/MY.727920	1	25		1492084219	H. 244						H1128128	http://tun.fi/HR.168	Luomus, University of Eastern Finland		GX.231
PRESERVED_SPECIMEN	Asplenium laetum	species	BR	http://id.luomus.fi/EIG.7702	EIG.7702	Asplenium	laetum	Brazil	1873	1873-08-25		Mosen					H	25.08.1873		Minas Gerais			Central America, South America and the Antarctic	http://tun.fi/MY.727923	8	25	Caldas	1492084219							H1128129	http://tun.fi/HR.168	Luomus, University of Eastern Finland	Minas Geraes	GX.231
PRESERVED_SPECIMEN	Asplenium laserpitiifolium	species	ID	http://id.luomus.fi/EIG.7724	EIG.7724	Asplenium	laserpitiifolium	Indonesia	1910	1910-02-01/1910-02-28		Mousset, J. P.					H	02.1910		Yogyakarta			Asia	http://tun.fi/MY.727995	2		Wonosari, Gunung Kidul	1492084220							H1591213	http://tun.fi/HR.168	Luomus, University of Eastern Finland	Tenggergebirges. 1150 m.	GX.270
PRESERVED_SPECIMEN	Asplenium mannii	species	ET	http://id.luomus.fi/EIG.7788	EIG.7788	Asplenium	mannii	Ethiopia	1965	1965-06-05	Bellete State Forest, 40 km SW of Jimma						H	05.06.1965					Africa	http://tun.fi/MY.728202	6	5		1492084224	7002						H1084137	http://tun.fi/HR.168	Luomus, University of Eastern Finland	Alt.: ± 200 m.	GX.231
PRESERVED_SPECIMEN	Asplenium monanthes	species	ET	http://id.luomus.fi/EIG.7743	EIG.7743	Asplenium	monanthes	Ethiopia	1972	1972-01-30	Simien National Park, Geech plateau. On the banks of Djinn Bahr.	Heinonen, Kirsti					H	30.01.1972		Amhara			Africa	http://tun.fi/MY.728058	1	30	North Gondar	1492084221	1056						H1074244	http://tun.fi/HR.168	Luomus, University of Eastern Finland	Begemder, 3400 m above sea.	GX.231
PRESERVED_SPECIMEN	Asplenium nidus	species	ID	http://id.luomus.fi/EIG.7773	EIG.7773	Asplenium	nidus	Indonesia	1910	1910-02-01/1910-02-28	Nongko djadjar	Mousset, J. P.					H	02.1910		Java			Asia	http://tun.fi/MY.728157	2			1492084223							H1591220	http://tun.fi/HR.168	Luomus, University of Eastern Finland	1250 m	GX.231
PRESERVED_SPECIMEN	Asplenium normale	species	CN	http://id.luomus.fi/EIG.7879	EIG.7879	Asplenium	normale	China	1969	1969-11-16	Mount Alishan	Kao, M. T.					H	16.11.1969					Asia	http://tun.fi/MY.728502	11	16	Chiayi	1492084231							H1128191	http://tun.fi/HR.168	Luomus, University of Eastern Finland	Mt. A-li, Chinyi Co.	GX.231
PRESERVED_SPECIMEN	Asplenium polyodon	species	US	http://id.luomus.fi/EIG.8123	EIG.8123	Asplenium	polyodon	United States	1955	1955-09-09	Kohua Ridge						H	09.09.1955		Hawaii			Australia and Oceania	http://tun.fi/MY.729318	9	9	Kauai	1492084248							H1281307	http://tun.fi/HR.168	Luomus, University of Eastern Finland		GX.270
PRESERVED_SPECIMEN	Asplenium praemorsum	species	BR	http://id.luomus.fi/EIG.8137	EIG.8137	Asplenium	praemorsum	Brazil	1873	1873-09-25	Caldas	Hosén					H	25.09.1873		Southeast			Central America, South America and the Antarctic	http://tun.fi/MY.729360	9	25	Minas Gerais	1492084248							H1127952	http://tun.fi/HR.168	Luomus, University of Eastern Finland	Prov. Minas Geraes: Caldas	GX.2951
PRESERVED_SPECIMEN	Asplenium prolongatum	species	CN	http://id.luomus.fi/EIG.8145	EIG.8145	Asplenium	prolongatum	China	1941	1941-06-10	Tungchung and Vicinity, Lantau Island	Taam, Y. W.					H	10.06.1941		Hong Kong			Asia	http://tun.fi/MY.729387	6	10		1492084249	2144						H1128278	http://tun.fi/HR.168	Luomus, University of Eastern Finland	Lantao Island	GX.270
PRESERVED_SPECIMEN	Asplenium protensum	species	ET	http://id.luomus.fi/EIG.8147	EIG.8147	Asplenium	protensum	Ethiopia	1982	1982-10-25	Mount Wechecha, Menagesha State Forest, c. 20 km W of Addis Ababa	Kukkonen, Ilkka				Dms	H	25.10.1982		Oromia			Africa	http://tun.fi/MY.729393	10	25		1492084249	12357						H1489705	http://tun.fi/HR.168	Luomus, University of Eastern Finland	Shewa Adm. Reg., c. 2600 m.	GX.231	9°00'N, 38°33'E (degrees, minutes)
PRESERVED_SPECIMEN	Asplenium radicans	species	BR	http://id.luomus.fi/EIG.8165	EIG.8165	Asplenium	radicans	Brazil	1873	1873-09-01	Caldas	Hosen					H	01.09.1873		Southeast			Central America, South America and the Antarctic	http://tun.fi/MY.729453	9	1	Minas Gerais	1492084250							H1128289	http://tun.fi/HR.168	Luomus, University of Eastern Finland	Minas Geraes	GX.270
PRESERVED_SPECIMEN	Asplenium radicans var. cirrhatum (Rich. ex Willd.) Rosenst.	VARIETY	VE	http://coldb.mnhn.fr/catalognumber/mnhn/p/p00220127	P00220127	Asplenium	radicans	Venezuela, Bolivarian Republic of				Moritz, J.W.K.	cirrhatum				P				Cremers			http://coldb.mnhn.fr/catalognumber/mnhn/p/p00220127				2015-09-24														Plantae	Tracheophyta	Polypodiales	Aspleniaceae	Polypodiopsida	P
PRESERVED_SPECIMEN	Asplenium ruta-muraria L.	SPECIES	EE	TU251269	TU251269	Asplenium	ruta-muraria	Estonia	1927	1927-06-26		Albert Üksip					TU	1927-06-26			Albert Üksip	1927-06-26T00:00:00.000+0000		TU251269	6	26				habitat: Kalkfelsen (=paekivi)							Natural History Museum, University of Tartu		4			Plantae	Tracheophyta	Polypodiales	Aspleniaceae	Polypodiopsida	TU		Viridiplantae; Monilophyta; Polypodiopsida; Polypodiales; Aspleniaceae; Asplenium
PRESERVED_SPECIMEN	Asplenium salignum Blume	SPECIES	ID	http://data.biodiversitydata.nl/naturalis/specimen/L.3503879	L.3503879	Asplenium	salignum	Indonesia	1899	1899-10-22	Flora javanica. Tjibodas: Zu arrodis gedeh invisit Tjiborrom.	Dihm H					L	1899/10/22					ASIA	L.3503879	10	22																Plantae	Tracheophyta	Polypodiales	Aspleniaceae	Polypodiopsida	Botany	ICN	Plantae|Pteropsida|Polypodiales|Aspleniaceae
PRESERVED_SPECIMEN	Asplenium sandersonii	species	ET	http://id.luomus.fi/EIG.8322	EIG.8322	Asplenium	sandersonii	Ethiopia	1965	1965-08-14	Bonga, near R.C. Mission						H	14.08.1965					Africa	http://tun.fi/MY.729966	8	14		1492084261	7684						H1091941	http://tun.fi/HR.168	Luomus, University of Eastern Finland	Alt.: 2000 m.	GX.2951
PRESERVED_SPECIMEN	Aster acris L.	SPECIES	none	http://coldb.mnhn.fr/catalognumber/mnhn/p/p04372687	P04372687	Galatella	acris										P							http://coldb.mnhn.fr/catalognumber/mnhn/p/p04372687				2015-09-04														Plantae	Tracheophyta	Asterales	Asteraceae	Magnoliopsida	P
PRESERVED_SPECIMEN	Aster rubricaulis Lam.	SPECIES	US	http://www.botanicalcollections.be/specimen/BR0000005212712	BR0000005212712	Symphyotrichum	rubricaulis	United States	1833	1833-09-01	Fort McKenzie	Wied M.					BR							http://www.botanicalcollections.be/specimen/BR0000005212712	9			2010-12-02	S.N.								Meise Botanic Garden					Plantae	Tracheophyta	Asterales	Asteraceae	Magnoliopsida		ICBN
PRESERVED_SPECIMEN	Aster tongolensis Franch.	SPECIES	CN	http://data.rbge.org.uk/herb/E00268379	E00268379	Aster	tongolensis	China	2000	2000-07-09	Valley south of Baima along Makehe River.	Sino-British Qinghai Alpine Garden Society Expedition		32.792222	100.796667	WGS84	E	2000-07-09		Qinghai				http://data.rbge.org.uk/herb/E00268379	7	9		2008-02-04	818					3305 M	BGBASE:252559	http://biocol.org/urn:lsid:biocol.org:col:15670						Plantae	Tracheophyta	Asterales	Asteraceae	Magnoliopsida	E	ICBN
PRESERVED_SPECIMEN	Astragalus capito Boiss. & Hohen.	species	IR	http://id.luomus.fi/HA.H1283213	HA.H1283213	Astragalus	capito	IR	1994	1994-01-01/1994-12-31	In m. Totschal pr. Teheran.	Kotschy, Th. (571)					H		Isotype		D. Podlech	1994		http://tun.fi/MY.104008				1382503576							H1283213	http://tun.fi/HR.129	Luomus		GX.22		Boiss. & Hohen.
PRESERVED_SPECIMEN	Astragalus carniolicus A.Kern.	species	SI	http://id.luomus.fi/HA.H1283217	HA.H1283217	Astragalus	carniolicus	SI	1994	1994-01-01/1994-12-31	Carniolia [Carniola]. In pratis montis Nanos.	Not on sheet					H		Isolectotype		D. Podlech	1994		http://tun.fi/MY.104014				1382503576		Solo calcareo.				1 250 meters	H1283217	http://tun.fi/HR.129	Luomus		GX.22		A.Kern.
PRESERVED_SPECIMEN	Astragalus parrisii Podlech	SPECIES	IR	http://data.rbge.org.uk/herb/E00071177	E00071177	Astragalus	parrisii	Iran, Islamic Republic of	1975	1975-04-28	Between Darband & Kerman.	Parris, Barbara S.		30.716667	57.033333	WGS84	E	1975-04-28	HOLOTYPE	Kerman				http://data.rbge.org.uk/herb/E00071177	4	28		2010-09-13	75.175					2500 M	BGBASE:78323	http://biocol.org/urn:lsid:biocol.org:col:15670						Plantae	Tracheophyta	Fabales	Fabaceae	Magnoliopsida	E	ICBN
PRESERVED_SPECIMEN	Astragalus ptychophyllus Boiss.	species	IR	http://id.luomus.fi/HA.H1284843	HA.H1284843	Astragalus	ptychophyllus	IR	1994	1994-01-01/1994-12-31	In cacumine m. Sabst-Buschon [Sabz Pushan] pr. u. Schiras [Shiraz].	Kotschy, Th. (430)					H		Isolectotype		D. Podlech	1994		http://tun.fi/MY.104180				1382503577							H1284843	http://tun.fi/HR.129	Luomus		GX.22		Boiss.
PRESERVED_SPECIMEN	Astragalus szovitsii Fisch. & C.A.Mey.	species	AZ	http://id.luomus.fi/HA.H1284824	HA.H1284824	Astragalus	szovitsii	AZ	1994	1994-01-01/1994-12-31	In collibus siccissimis lapidosis secus fl. Nakitschivan tschai [Nakhichevanchai].	Szovits, J. N.					H		Isolectotype		D. Podlech	1994		http://tun.fi/MY.104174				1382503577							H1284824	http://tun.fi/HR.129	Luomus		GX.22		Fisch. & C.A.Mey.
PRESERVED_SPECIMEN	Astragalus vulpinus Willd.	SPECIES	none	http://coldb.mnhn.fr/catalognumber/mnhn/p/p02724277	P02724277	Astragalus	vulpinus										P				Ghahremaninejad			http://coldb.mnhn.fr/catalognumber/mnhn/p/p02724277				2015-09-04														Plantae	Tracheophyta	Fabales	Fabaceae	Magnoliopsida	P
PRESERVED_SPECIMEN	Astrotricha floccosa DC.	SPECIES	AU	http://www.botanicalcollections.be/specimen/BR0000005785315	BR0000005785315	Astrotricha	floccosa	Australia			Mediterranea of New South Wales	Collector unknown					BR	S.D.						http://www.botanicalcollections.be/specimen/BR0000005785315				2011-11-22	S.N.								Meise Botanic Garden					Plantae	Tracheophyta	Apiales	Araliaceae	Magnoliopsida		ICBN
PRESERVED_SPECIMEN	Astrotricha ledifolia DC.	SPECIES	AU	http://www.botanicalcollections.be/specimen/BR0000005785643	BR0000005785643	Astrotricha	ledifolia	Australia			S.L.	Sieber F.W.					BR	S.D.						http://www.botanicalcollections.be/specimen/BR0000005785643				2011-11-22	S.N.								Meise Botanic Garden					Plantae	Tracheophyta	Apiales	Araliaceae	Magnoliopsida		ICBN
PRESERVED_SPECIMEN	Atalaya hemiglauca F.Muell. ex Benth.	SPECIES	AU	http://www.botanicalcollections.be/specimen/BR0000013223373	BR0000013223373	Atalaya	hemiglauca	Australia			Darling River	Von Mueller F.					BR	S.D.						http://www.botanicalcollections.be/specimen/BR0000013223373				2014-01-27	S.N.								Meise Botanic Garden					Plantae	Tracheophyta	Sapindales	Sapindaceae	Magnoliopsida		ICBN
PRESERVED_SPECIMEN	Athyrium microphyllum	species	US	http://id.luomus.fi/EIG.4866	EIG.4866	Athyrium	microphyllum	United States	1938	1938-05-11	Kaʻala						H	11.05.1938		Hawaii			Australia and Oceania	http://tun.fi/MY.718527	5	11	Oahu	1492084021	12031						H1550847	http://tun.fi/HR.168	Luomus, University of Eastern Finland	Summit of Koala, Oahu, T. H.	GX.231
PRESERVED_SPECIMEN	Athyrium nigripes	species	ID	http://id.luomus.fi/EIG.4933	EIG.4933	Athyrium	nigripes	Indonesia	1893	1893-04-25		Möller, Hjalmar					H	25.04.1893		Java			Asia	http://tun.fi/MY.718752	4	25		1492084026							H1127338	http://tun.fi/HR.168	Luomus, University of Eastern Finland	Plantae Javanicae, ?, c. 2000 m	GX.270
PRESERVED_SPECIMEN	Athyrium subrigescens	species	CN	http://id.luomus.fi/EIG.5251	EIG.5251	Athyrium	subrigescens	China	1974	1974-05-26/1974-05-29	Nanhutashan Mountain.	Kuo, C. M.					H	26/29.05.1974		Northeastern			Asia	http://tun.fi/MY.719808	5		Yilan	1492084052	5103						H1228017	http://tun.fi/HR.168	Luomus, University of Eastern Finland	ILAN CO.: Nanhutashan	GX.2951
PRESERVED_SPECIMEN	Aulonemia pumila L.G.Clark & Londoño	SPECIES	CO	http://specimens.kew.org/herbarium/K000433199	K000433199	Aulonemia	pumila	Colombia	1988	1988-02-05	Km 34 from Pasto on the Pasto-Sibundoy road, Paramo San Antonio de Bordoncillo	Londoño, X.; Clark, L.G.; Corredor, B.		1.13	-77.08	WGS84	K		ISOTYPE		L.G. Clark			K000433199	2	5		2007-04-23	382	bgoggy area of paramo	in full bloom, leaves almost gone. culms to 1m tall	0.2										Plantae	Tracheophyta	Poales	Poaceae	Liliopsida	Herbarium		POACEAE
PRESERVED_SPECIMEN	Aulotandra humbertii H.Perrier	SPECIES	MG	http://coldb.mnhn.fr/catalognumber/mnhn/p/p00540627	P00540627	Aulotandra	humbertii	Madagascar				Humbert, H.					P		TYPE					http://coldb.mnhn.fr/catalognumber/mnhn/p/p00540627				2015-09-04										Collines et plateaux calcaires de l'Ankarana (Province de Diégo-Suarez)				Plantae	Tracheophyta	Zingiberales	Zingiberaceae	Liliopsida	P
PRESERVED_SPECIMEN	Avicennia tomentosa Jacquin	SPECIES	BR	http://specimens.kew.org/herbarium/K001046329	K001046329	Avicennia	tomentosa	Brazil	1960	1960-09-07	Mangue próximo ao Jóquei Clube da Ilha do Governador.	Pabst, G.					K							K001046329	9	7		2015-07-28	5421													Plantae	Tracheophyta	Lamiales	Acanthaceae	Magnoliopsida	Herbarium		ACANTHACEAE
PRESERVED_SPECIMEN	Axonopus aureus P.Beauv.	SPECIES	BR	http://specimens.kew.org/herbarium/K000643211	K000643211	Axonopus	aureus	Brazil									K							K000643211				2009-08-04														Plantae	Tracheophyta	Poales	Poaceae	Liliopsida	Herbarium		POACEAE
PRESERVED_SPECIMEN	Baccharis aphylla DC.	SPECIES	BR	http://specimens.kew.org/herbarium/K001100358	K001100358	Baccharis	aphylla	Brazil	2006	2006-09-19	Parque Estadual do Ibitipo.	Borges, R.A.X.					K							K001100358	9	19		2015-05-15	259													Plantae	Tracheophyta	Asterales	Asteraceae	Magnoliopsida	Herbarium		COMPOSITAE
PRESERVED_SPECIMEN	Baccharoides adoensis (Sch.Bip. ex Walp.) H.Rob.	SPECIES	ET	http://data.rbge.org.uk/herb/E00513937	E00513937	Baccharoides	adoensis	Ethiopia	1863	1863-01-01		Schimper, Georg Heinrich Wilhelm					E	1863	ISOTYPE					http://data.rbge.org.uk/herb/E00513937				2014-02-19	817						BGBASE:526770	http://biocol.org/urn:lsid:biocol.org:col:15670						Plantae	Tracheophyta	Asterales	Asteraceae	Magnoliopsida	E	ICBN
PRESERVED_SPECIMEN	Baeckea frutescens L.	SPECIES	ID	http://data.biodiversitydata.nl/naturalis/specimen/L.2502880	L.2502880	Baeckea	frutescens	Indonesia	1954	1954-02-18	Dessa Anggi Gije meer (Jaag), Eiland Nieuw Guinea, Res. Manokwari. *.	Versteegh C					L	1954/02/18		New Guinea			ASIA	L.2502880	2	18																Plantae	Tracheophyta	Myrtales	Myrtaceae	Magnoliopsida	Botany	ICN	Plantae|Magnoliopsidae|Myrtales|Myrtaceae
PRESERVED_SPECIMEN	Baeckea trapeza A.R.Bean	SPECIES	AU	http://specimens.kew.org/herbarium/K000821741	K000821741	Baeckea	trapeza	Australia	1996	1996-01-27	Two Mile Creek, Blackdown Tableland, SE of Blackwater.	Bean, A.R.		-23.75	149.1	WGS84	K		ISOTYPE		Bean, A.R.	1998-01-10T00:00:00.000+0000		K000821741	1	27		2012-08-30	9624	Creekbank adjacent to open forest of Eucalyptus sphaerocarpa and Anguphora leiocarpa.	Shrub 60cm high, flowers white.	0.2										Plantae	Tracheophyta	Myrtales	Myrtaceae	Magnoliopsida	Herbarium		MYRTACEAE
PRESERVED_SPECIMEN	Baldellia ranunculoides Parl.	SPECIES	BE	http://www.botanicalcollections.be/specimen/BR0000027504086V	BR0000027504086V	Baldellia	ranunculoides	Belgium	1903	1903-01-01	Genk	Aigret C.					BR							http://www.botanicalcollections.be/specimen/BR0000027504086V				2017-10-16	SN								Meise Botanic Garden					Plantae	Tracheophyta	Alismatales	Alismataceae	Liliopsida		ICBN
PRESERVED_SPECIMEN	Barbula sulcata Geh.	species	CV	http://id.luomus.fi/HA.H3300713	HA.H3300713	Barbula	sulcata	CV	1864	1864-01-01/1864-12-31	Monte Gordo, São Nicolau	Lowe (16)		16.62	-24.35	WGS84	H		Type	Barlavento	Geheeb, Adalbert		Africa	http://tun.fi/MY.118866				1382503775		Ad rupes.		1		4500 feet	H3300713	http://tun.fi/HR.189	Luomus	Insul. Capit. viril.: São Nicolaõ, Mte. Gordo, sterilum.	GX.22	16.62 -24.35 WGS84	Geh.
PRESERVED_SPECIMEN	Barleria velutina Champl.	SPECIES	CD	http://www.botanicalcollections.be/specimen/BR0000008525000	BR0000008525000	Barleria	velutina	Congo, Democratic Republic of the	1985	1985-05-15	Shinkolobwe, terr[itoire] Kambove	Malaisse F. & Goetghebeur P.		-11.033333	26.566667	WGS84	BR		HOLOTYPE					http://www.botanicalcollections.be/specimen/BR0000008525000	5	15		2013-09-23	885	s.h.							Meise Botanic Garden					Plantae	Tracheophyta	Lamiales	Acanthaceae	Magnoliopsida		ICBN
PRESERVED_SPECIMEN	Bartonia tenella Muhl. ex Willd.	SPECIES	US	http://www.botanicalcollections.be/specimen/BR0000005916481	BR0000005916481	Bartonia	tenella	United States			S.L.	Collector unknown					BR	S.D.						http://www.botanicalcollections.be/specimen/BR0000005916481				2012-05-14	S.N.								Meise Botanic Garden					Plantae	Tracheophyta	Gentianales	Gentianaceae	Magnoliopsida		ICBN
PRESERVED_SPECIMEN	Bauhinia forficata Link	SPECIES	BR	http://specimens.kew.org/herbarium/K000807303	K000807303	Bauhinia	forficata	Brazil	1965	1965-02-14	15km due NW of Registro ( or 1 km due S of SETE BARRAS). Near roadfork.	Clayton, W.D.; Eiten, G.		-24.4	-47.92	WGS84	K							K000807303	2	14		2012-08-07	6057	"In broad, flat alluvial valley plain. Area originally forested now cleared. Scrub of low trees at roadside."	Shrub 4-5m tall. Sepals light green, petals whute, filaments white, style green below to white above, stigma light green											Plantae	Tracheophyta	Fabales	Fabaceae	Magnoliopsida	Herbarium		LEGUMINOSAE-CAESALPINIOIDEAE
PRESERVED_SPECIMEN	Bauhinia rufa Steud.	SPECIES	BR	http://specimens.kew.org/herbarium/K000807066	K000807066	Bauhinia	rufa	Brazil				Glaziou, A.					K							K000807066				2012-08-02	21014													Plantae	Tracheophyta	Fabales	Fabaceae	Magnoliopsida	Herbarium		LEGUMINOSAE-CAESALPINIOIDEAE
PRESERVED_SPECIMEN	Begonia grandis subsp. sinensis (A.DC.) Irmsch.	SUBSPECIES	CN	http://data.rbge.org.uk/herb/E00315011	E00315011	Begonia	grandis	China				Henry, Augustine	sinensis				E							http://data.rbge.org.uk/herb/E00315011				2009-06-22	2707						BGBASE:320498	http://biocol.org/urn:lsid:biocol.org:col:15670						Plantae	Tracheophyta	Cucurbitales	Begoniaceae	Magnoliopsida	E	ICBN
PRESERVED_SPECIMEN	Begonia longipetiolata Gilg	SPECIES	NL	http://data.biodiversitydata.nl/naturalis/specimen/WAG.1163030	WAG.1163030	Begonia	longipetiolata	Netherlands			Wageningen. Agric. University. Dep. of Horticulture.	Arends JC					L	1985/03/31 | 1985/03/01		Gelderland	Arends JC		EUROPE	WAG.1163030																		Plantae	Tracheophyta	Cucurbitales	Begoniaceae	Magnoliopsida	Botany	ICN	Plantae|Magnoliopsidae|Cucurbitales|Begoniaceae
PRESERVED_SPECIMEN	Begonia samhaensis M.Hughes & A.G.Mill.	SPECIES	YE	http://data.rbge.org.uk/herb/E00239279	E00239279	Begonia	samhaensis	Yemen	1999	1999-02-16	Samhah: summit of island, shady north facing clifs frequently mist covered	Miller, A.G. & Hughes, M.					E	1999-02-16	HOLOTYPE					http://data.rbge.org.uk/herb/E00239279	2	16		2009-01-26	M.17092					750 M	BGBASE:251144	http://biocol.org/urn:lsid:biocol.org:col:15670						Plantae	Tracheophyta	Cucurbitales	Begoniaceae	Magnoliopsida	E	ICBN
PRESERVED_SPECIMEN	Begonia sanguineopilosa D.C.Thomas & Ardi	SPECIES	ID	http://data.rbge.org.uk/herb/E00502324	E00502324	Begonia	sanguineopilosa	Indonesia	2009	2009-05-11	Gunung Mambulinin	Thomas, D C; Ardi, W H		-2.895278	119.360556	WGS84	E	2009-05-11	HOLOTYPE	West Sumatra [Sumatera Barat]				http://data.rbge.org.uk/herb/E00502324	5	11		2012-02-23	09-129					1856 M	BGBASE:570528	http://biocol.org/urn:lsid:biocol.org:col:15670						Plantae	Tracheophyta	Cucurbitales	Begoniaceae	Magnoliopsida	E	ICBN
PRESERVED_SPECIMEN	Begonia susaniae Sosef	SPECIES	GA	http://www.botanicalcollections.be/specimen/BR0000008864185	BR0000008864185	Begonia	susaniae	Gabon	1978	1978-08-15	About 11 km. along the road from Asok to the Hydroelectric power station in the Tchimbélé River	Breteler F.J. & de Wilde J.J.F.E.					BR		ISOTYPE					http://www.botanicalcollections.be/specimen/BR0000008864185	8	15		2006-03-06	25								Meise Botanic Garden					Plantae	Tracheophyta	Cucurbitales	Begoniaceae	Magnoliopsida		ICBN
PRESERVED_SPECIMEN	Begonia tuberculosa Girm.	SPECIES	ID	http://data.rbge.org.uk/herb/E00260931	E00260931	Begonia	tuberculosa	Indonesia	2007	2007-05-14	G. Sinabung	Hughes, Mark		3.175833	98.391944	WGS84	E	2007-05-14	ISOTYPE	Sumatra				http://data.rbge.org.uk/herb/E00260931	5	14		2012-09-26	MH1394					1399 M	BGBASE:273671	http://biocol.org/urn:lsid:biocol.org:col:15670						Plantae	Tracheophyta	Cucurbitales	Begoniaceae	Magnoliopsida	E	ICBN
PRESERVED_SPECIMEN	Beilschmiedia cinnamomea (Stapf) Robyns & Wilczek	SPECIES	CM	http://www.botanicalcollections.be/specimen/BR0000006250881	BR0000006250881	Beilschmiedia	cinnamomea	Cameroon	1904	1904-01-01	Bipinde, Urwaldgebiet	Zenker G.					BR		TYPE					http://www.botanicalcollections.be/specimen/BR0000006250881				2006-10-18	2855								Meise Botanic Garden					Plantae	Tracheophyta	Laurales	Lauraceae	Magnoliopsida		ICBN
PRESERVED_SPECIMEN	Belloa plicatifolia A.Sagást. & M.O.Dillon	SPECIES	PE	http://specimens.kew.org/herbarium/K000500447	K000500447	Mniodes	plicatifolia	Peru	1981	1981-06-14	Las Quinuas - El Mojón Prov.: Contumazá Dpto.: Cajamarca	Sagástegui, A.A.; Mostacero, J.L.; García; López					K		ISOTYPE		Dillon, M.O.			K000500447	6	14		2007-09-14	10117	ladera	hierba pilosa con capítulos blanquecimos											Plantae	Tracheophyta	Asterales	Asteraceae	Magnoliopsida	Herbarium		COMPOSITAE
PRESERVED_SPECIMEN	Berberis lecomtei C.K.Schneid.	SPECIES	CN	http://data.rbge.org.uk/herb/E00392893	E00392893	Berberis	lecomtei	China	1932	1932-01-01		Rock, Joseph Francis Charles					E	1932						http://data.rbge.org.uk/herb/E00392893				2010-12-15	24804						BGBASE:448207	http://biocol.org/urn:lsid:biocol.org:col:15670						Plantae	Tracheophyta	Ranunculales	Berberidaceae	Magnoliopsida	E	ICBN
PRESERVED_SPECIMEN	Berberis replicata W.W.Sm.	SPECIES	CN	http://data.rbge.org.uk/herb/E00117381	E00117381	Berberis	replicata	China	1924		In the Machang valley	Forrest, George		25.2	98.583333	WGS84	E	July 1924		Yunnan				http://data.rbge.org.uk/herb/E00117381				2000-10-27	24682					6000 FT	BGBASE:123839	http://biocol.org/urn:lsid:biocol.org:col:15670						Plantae	Tracheophyta	Ranunculales	Berberidaceae	Magnoliopsida	E	ICBN
PRESERVED_SPECIMEN	Berberis replicata W.W.Sm.	SPECIES	CN	http://data.rbge.org.uk/herb/E00117382	E00117382	Berberis	replicata	China	1912		Ma Chang Kai valley	Forrest, George					E	December 1912		Yunnan				http://data.rbge.org.uk/herb/E00117382				2001-01-19	9457					7-8000 FT	BGBASE:123840	http://biocol.org/urn:lsid:biocol.org:col:15670						Plantae	Tracheophyta	Ranunculales	Berberidaceae	Magnoliopsida	E	ICBN
PRESERVED_SPECIMEN	Berberis thunbergii DC.	SPECIES	BE	http://www.botanicalcollections.be/specimen/BR0000012562770	BR0000012562770	Berberis	thunbergii	Belgium	2008	2008-04-20		Verloove F.					BR							http://www.botanicalcollections.be/specimen/BR0000012562770	4	20		2010-12-22	7100								Meise Botanic Garden					Plantae	Tracheophyta	Ranunculales	Berberidaceae	Magnoliopsida		ICBN
PRESERVED_SPECIMEN	Berberis tsarongensis var. megacarpa Ahrendt	VARIETY	CN	http://data.rbge.org.uk/herb/E00112411	E00112411	Berberis	tsarongensis	China	1938	1938-09-30	Molo, Lilung Chu.	Ludlow, Frank: Sherriff, George & Taylor, George	megacarpa	28.9	93.883333	WGS84	E	1938-09-30		Xizang (Tibet) Aut. Reg.				http://data.rbge.org.uk/herb/E00112411	9	30		2011-01-17	6544					3500 M	BGBASE:129870	http://biocol.org/urn:lsid:biocol.org:col:15670						Plantae	Tracheophyta	Ranunculales	Berberidaceae	Magnoliopsida	E	ICBN
PRESERVED_SPECIMEN	Berberis vulgaris L.	SPECIES	FR	http://coldb.mnhn.fr/catalognumber/mnhn/p/p00614877	P00614877	Berberis	vulgaris	France	1959	1959-06-17		Raynal, J.					P			05 Hautes-Alpes				http://coldb.mnhn.fr/catalognumber/mnhn/p/p00614877	6	17		2018-01-23										Villar-d'Arène (Hautes-Alpes)				Plantae	Tracheophyta	Ranunculales	Berberidaceae	Magnoliopsida	P
PRESERVED_SPECIMEN	Berchemia floribunda (Wall.) Brongn.	SPECIES	CN	http://data.rbge.org.uk/herb/E00120460	E00120460	Berchemia	floribunda	China	1918		Shweli Salwin divide	Forrest, George					E	August 1918		Yunnan				http://data.rbge.org.uk/herb/E00120460				2000-11-03	17617					6-7000 FT	BGBASE:126260	http://biocol.org/urn:lsid:biocol.org:col:15670						Plantae	Tracheophyta	Rosales	Rhamnaceae	Magnoliopsida	E	ICBN
PRESERVED_SPECIMEN	Berteroa incana DC.	SPECIES	NL	http://data.biodiversitydata.nl/naturalis/specimen/WAG.1241218	WAG.1241218	Berteroa	incana	Netherlands	1960	1960-09-23	Netherlands, Prov. Gelderland. In industrial quarter of Arnhem.	Bruijn J de					L	1960/09/23					EUROPE	WAG.1241218	9	23																Plantae	Tracheophyta	Brassicales	Brassicaceae	Magnoliopsida	Botany	ICN	Plantae|Magnoliopsidae|Brassicales|Cruciferae
PRESERVED_SPECIMEN	Betula humilis Schrank	SPECIES	EE	TU259318	TU259318	Betula	humilis	Estonia	1951	1951-05-13	Melgi vastas, Jõesuu-Palupõhja vahelisel	K. Eichwald					TU	1951-05-13			K. Eichwald	1951-05-13T00:00:00.000+0000		TU259318	5	13				habitat: luhal					11830		Natural History Museum, University of Tartu		4			Plantae	Tracheophyta	Fagales	Betulaceae	Magnoliopsida	TU		Viridiplantae; Anthophyta; Eudicotyledonae; Fagales; Betulaceae; Betula
PRESERVED_SPECIMEN	Betula humilis Schrank	SPECIES	EE	TU259343	TU259343	Betula	humilis	Estonia	1990	1990-06-26	Järvakandi mk. Mõniste vhk.	Tammiksaar					TU	1990-06-26			Tammiksaar	1990-06-26T00:00:00.000+0000		TU259343	6	26	Rapla maakond			habitat: madalsoo äärest							Natural History Museum, University of Tartu		4			Plantae	Tracheophyta	Fagales	Betulaceae	Magnoliopsida	TU		Viridiplantae; Anthophyta; Eudicotyledonae; Fagales; Betulaceae; Betula
PRESERVED_SPECIMEN	Betula nana L.	SPECIES	EE	TU260143	TU260143	Betula	nana	Estonia	1972	1972-07-20	Harju rajoon, Joaveski	Allik					TU	1972-07-20			Allik	1972-07-20T00:00:00.000+0000		TU260143	7	20				habitat: rabas							Natural History Museum, University of Tartu		4			Plantae	Tracheophyta	Fagales	Betulaceae	Magnoliopsida	TU		Viridiplantae; Anthophyta; Eudicotyledonae; Fagales; Betulaceae; Betula
PRESERVED_SPECIMEN	Betula nana L.	SPECIES	EE	TU260159	TU260159	Betula	nana	Estonia	1974	1974-07-11	Viljandi rajoon, Kikepera	M. Roosiväli | M. Pärn					TU	1974-07-11			M. Pärn | M. Roosiväli	1974-07-11T00:00:00.000+0000		TU260159	7	11				habitat: raba					48		Natural History Museum, University of Tartu		4			Plantae	Tracheophyta	Fagales	Betulaceae	Magnoliopsida	TU		Viridiplantae; Anthophyta; Eudicotyledonae; Fagales; Betulaceae; Betula
PRESERVED_SPECIMEN	Betula nana L.	SPECIES	EE	TU260220	TU260220	Betula	nana	Estonia	1965	1965-07-16	Kullamaast 2 km N.	I. Bogovski					TU	1965-07-16			I. Bogovski	1965-07-16T00:00:00.000+0000		TU260220	7	16				habitat: palumetsa serval					45		Natural History Museum, University of Tartu		4			Plantae	Tracheophyta	Fagales	Betulaceae	Magnoliopsida	TU		Viridiplantae; Anthophyta; Eudicotyledonae; Fagales; Betulaceae; Betula
PRESERVED_SPECIMEN	Betula nana L.	SPECIES	GB	c6476550-eac2-485a-8fc3-23fbd9997449	BM001074360	Betula	nana	United Kingdom	1982	1982-05-26		Richard John Pankhurst		55.094625	-2.095423	WGS84	BM			England			EUROPE	2395222	5	26		2017-10-17	82/45	With Calluna, Erica tetralix, Eriophorum on raised bog. Stems 30cm.					NHMUK:ecatalogue:2395222							Plantae	Tracheophyta	Fagales	Betulaceae	Magnoliopsida	BOT		Dicotyledones; Betulaceae
PRESERVED_SPECIMEN	Betula pendula Roth	SPECIES	CN	http://data.rbge.org.uk/herb/E00746890	E00746890	Betula	pendula	China	1995	1995-09-09	Wu Feng Shan (Ri Dag) SE of Zhongdian, near race course	Forestry Commission/RBGE Dêqên Expedition (1995)		27.8	99.722222	WGS84	E	1995-09-09		Yunnan				http://data.rbge.org.uk/herb/E00746890	9	9	Dêqên Zang Aut. Pref.	2016-01-10	55					3300 M	BGBASE:685505	http://biocol.org/urn:lsid:biocol.org:col:15670						Plantae	Tracheophyta	Fagales	Betulaceae	Magnoliopsida	E	ICBN
PRESERVED_SPECIMEN	Bidens cernua L.	SPECIES	NL	http://data.biodiversitydata.nl/naturalis/specimen/L.3419207	L.3419207	Bidens	cernua	Netherlands			Vrij algemeen langs slootkanten Beeklaan, Den Haag.	Bondam R					L						EUROPE	L.3419207																		Plantae	Tracheophyta	Asterales	Asteraceae	Magnoliopsida	Botany	ICN	Plantae|Magnoliopsidae|Asterales|Compositae
PRESERVED_SPECIMEN	Bidens tripartita L.	SPECIES	EE	TU258450	TU258450	Bidens	tripartita	Estonia	2008	2008-08-10	Palivere	Laura Kütt					TU	2008-08-10			Tõnu Ploompuu			TU258450	8	10	Lääne-Viru maakond			habitat: madalsoo							Natural History Museum, University of Tartu		4			Plantae	Tracheophyta	Asterales	Asteraceae	Magnoliopsida	TU		Viridiplantae; Anthophyta; Eudicotyledonae; Asterales; Asteraceae; Bidens
PRESERVED_SPECIMEN	Bikinia durandii (F.Hallé & Normand) Wieringa	SPECIES	GA	http://data.biodiversitydata.nl/naturalis/specimen/WAG0003334	WAG0003334	Bikinia	durandii	Gabon	1959	1959-09-06	N'kan (between Etsam and Méla).	Saint Aubin G de		0.65	10.316667	WGS84	L	1959/09/06	ISOTYPE	Estuaire	Wieringa JJ	1999-09-30T00:00:00.000+0000	AFRICA	WAG0003334	9	6																Plantae	Tracheophyta	Fabales	Fabaceae	Magnoliopsida	Botany	ICN	Plantae|Magnoliopsidae|Fabales|Leguminosae-Caes.
PRESERVED_SPECIMEN	Blechnum arborescens (Kl. & H.Karst) Hieron	SPECIES	BR	http://specimens.kew.org/herbarium/K000954210	K000954210	Parablechnum	arborescens	Brazil				Glaziou, A.					K				Chambers, T.C.	1978-01-25T00:00:00.000+0000		K000954210				2014-09-24	7009													Plantae	Tracheophyta	Polypodiales	Blechnaceae	Polypodiopsida	Herbarium		BLECHNACEAE
PRESERVED_SPECIMEN	Blechnum ivohibense C.Chr.	SPECIES	MG	b8694b76-98cb-4db1-980c-22b98b68c336	BM001066246	Austroblechnum	ivohibense	Madagascar	1924	1924-11-01		Jean-Henri Humbert					BM		HOLOTYPE	Antananarivo			AFRICA	1999010	11			2017-08-21	3300	Restes de forêts.					NHMUK:ecatalogue:1999010							Plantae	Tracheophyta	Polypodiales	Blechnaceae	Polypodiopsida	BOT		Blechnaceae
PRESERVED_SPECIMEN	Blechnum opacum Mett.	SPECIES	NC	http://www.botanicalcollections.be/specimen/BR0000013305864	BR0000013305864	Cranfillia	opacum	New Caledonia	1847	1847-01-01	Bagup	Vieillard E.					BR	47	TYPE					http://www.botanicalcollections.be/specimen/BR0000013305864				2012-07-09	1533								Meise Botanic Garden					Plantae	Tracheophyta	Polypodiales	Blechnaceae	Polypodiopsida		ICBN
PRESERVED_SPECIMEN	Bolbitis appendiculata	species	ID	http://id.luomus.fi/EIG.6835	EIG.6835	Bolbitis	appendiculata	Indonesia	1897	1897-07-27	Pelabuhan Ratu	Möller, Hjalmar					H	27.07.1897		West Java			Asia	http://tun.fi/MY.725052	7	27		1492084160							H1123934	http://tun.fi/HR.168	Luomus, University of Eastern Finland	Plantae Javanicae; Palabochan Ratu[?]	GX.2951
PRESERVED_SPECIMEN	Bolbitis heteroclita	species	ID	http://id.luomus.fi/EIG.6873	EIG.6873	Bolbitis	heteroclita	Indonesia	1910	1910-01-01/1910-01-31	Pogal	Mousset					H	01.1910		Java			Asia	http://tun.fi/MY.725178	1			1492084163							H1590504	http://tun.fi/HR.168	Luomus, University of Eastern Finland		GX.231
PRESERVED_SPECIMEN	Bolbitis heteroclita	species	ID	http://id.luomus.fi/EIG.6874	EIG.6874	Bolbitis	heteroclita	Indonesia	1904	1904-11-01/1904-11-30	in mount Lawang up to Zoute	Molhuysen					H	11.1904		Java			Asia	http://tun.fi/MY.725181	11			1492084163							H1590503	http://tun.fi/HR.168	Luomus, University of Eastern Finland		GX.2951
PRESERVED_SPECIMEN	Bolbitis subcordata	species	CN	http://id.luomus.fi/EIG.6930	EIG.6930	Bolbitis	subcordata	China	1940	1940-10-02	Hong Kong, Lantau Island, Lantao Peak and Vicinity	Taam, Y. W.					H	02.10.1940					Asia	http://tun.fi/MY.725367	10	2		1492084167	1845						H1123931	http://tun.fi/HR.168	Luomus, University of Eastern Finland		GX.231
PRESERVED_SPECIMEN	Bombax balanoides Ulbrich	SPECIES	PE	http://data.biodiversitydata.nl/naturalis/specimen/U%20%200043911	U 0043911	Pseudobombax	balanoides	Peru			Peru. Seringal Auristella.	Ule EHG					L	1911/06/30 | 1911/06/01	ISOTYPE	Amazonas			SOUTH_AMERICA	U 0043911																		Plantae	Tracheophyta	Malvales	Malvaceae	Magnoliopsida	Botany	ICN	Plantae|Magnoliopsidae|Malvales|Bombacaceae
PRESERVED_SPECIMEN	Bonamia burchellii Hallier f.	SPECIES	BR	http://specimens.kew.org/herbarium/K000945563	K000945563	Bonamia	burchellii	Brazil				Lindley					K							K000945563				2013-08-20	19	Informação não transcrita	Informação não transcrita											Plantae	Tracheophyta	Solanales	Convolvulaceae	Magnoliopsida	Herbarium		CONVOLVULACEAE
PRESERVED_SPECIMEN	Botrychium lunaria (L.) Sw.	SPECIES	EE	TU260247	TU260247	Botrychium	lunaria	Estonia	1964	1964-06-20	Rapla rajoon, Kehtna kn., Keava ja Lelle vahel kitsarööpmelise raudtee ääres	L. Pihlapuu					TU	1964-06-20			L. Pihlapuu	1964-06-20T00:00:00.000+0000		TU260247	6	20				habitat: niidul							Natural History Museum, University of Tartu		4			Plantae	Tracheophyta	Ophioglossales	Ophioglossaceae	Psilotopsida	TU		Viridiplantae; Monilophyta; Polypodiopsida; Ophioglossales; Ophioglossaceae; Botrychium
PRESERVED_SPECIMEN	Botrychium virginianum (L.) Sw.	SPECIES	EE	TU255742	TU255742	Botrypus	virginianum	Estonia	1928	1928-08-06		T. Lippmaa					TU	1928-08-06			T. Lippmaa	1928-08-06T00:00:00.000+0000		TU255742	8	6				habitat: liigirikas segamets, kruusasel pinnasel					5165.		Natural History Museum, University of Tartu		4			Plantae	Tracheophyta	Ophioglossales	Ophioglossaceae	Psilotopsida	TU		Viridiplantae; Monilophyta; Polypodiopsida; Ophioglossales; Ophioglossaceae; Botrychium
PRESERVED_SPECIMEN	Brachypodium pinnatum P.Beauv.	SPECIES	EE	TU284246	TU284246	Brachypodium	pinnatum	Estonia	2017	2017-07-18	Laelatu/Rame. bioloogiajaama majast vasakule, vahetult tee servast.	Tiiu Kupper		58.583333	23.5695	WGS84	TU	2017-07-18			Tiiu Kupper	2017-07-18T00:00:00.000+0000		TU284246	7	18	Lääne maakond										Natural History Museum, University of Tartu		130			Plantae	Tracheophyta	Poales	Poaceae	Liliopsida	TU		Viridiplantae; Anthophyta; Monocotyledonae; Poales; Poaceae; Brachypodium
PRESERVED_SPECIMEN	Brachythecium "glauculum" Müll. Hal.	species	CN	http://id.luomus.fi/HA.H3301313	HA.H3301313	Brachythecium	"glauculum"	CN	1896	1896-09-17		Giraldi, Père Giuseppe					H	17 Sept. 1896	Syntype	Shaanxi	C. Müller		Asia temperate	http://tun.fi/MY.124126	9	17		1382503975					Determ. Prof. C. Müller sub. no. 1852		H3301313	http://tun.fi/HR.189		China interior, provincia Schen-si sept. in monte Tui-Kio-san.	GX.22		Müll. Hal.
PRESERVED_SPECIMEN	Brachythecium salebrosum (Hoffm. ex F. Weber & D. Mor) Schimp. subsp. mamilligerum	species	CA	http://id.luomus.fi/HA.H3301205	HA.H3301205	Brachythecium	salebrosum	CA	1889	1889-07-19		Macoun, John	mamilligerum	50.83717	-118.98052	WGS84	H	19/7 89	Type	British Columbia	Not on sheet		Northern America	http://tun.fi/MY.123138	7	19	Sicamous	1382503804				2e4	Original spelling: Brachythecium mamilligerum Kindb.		H3301205	http://tun.fi/HR.189		Brit. Columbia, Sicamous.	GX.22	50.83717 -118.98052 WGS84 (20000m)	(Hoffm. ex F. Weber & D. Mor) Schimp.
PRESERVED_SPECIMEN	Brachythecium tenuinerve Cardot	species	MX	http://id.luomus.fi/HA.H3301051	HA.H3301051	Brachythecium	tenuinerve	MX	1908	1908-01-01/1908-12-31		Pringle, Cyrus Guernsey (15278)		20.60855	-100.32485	WGS84	H		Paratype		Not on sheet		Northern America	http://tun.fi/MY.121764				1382503795				2e5			H3301051	http://tun.fi/HR.189	Luomus	Mexique. District fédéral: Cañada, Vallée de Mexico.	GX.22	20.60855 -100.32485 WGS84 (200000m)	Cardot
PRESERVED_SPECIMEN	Brassicaceae	FAMILY	BE	http://www.botanicalcollections.be/specimen/BR0000025019780	BR0000025019780			Belgium	1978	1978-07-08	Dendermonde, bij de Scheldebrug (Linkeroever) D4 21 32	Robbrecht E.					BR	8/7/1978						http://www.botanicalcollections.be/specimen/BR0000025019780	7	8		2017-09-06	1332								Meise Botanic Garden					Plantae	Tracheophyta	Brassicales	Brassicaceae	Magnoliopsida		ICBN
PRESERVED_SPECIMEN	Breutelia patens Herzog	species	BO	http://id.luomus.fi/HA.H3016850	HA.H3016850	Breutelia	patens	BOLIVIA	1979	1979-06-05		Lewis, Marko (79-2395)		-17.234	-66.401	WGS84	H	5 June 1979	Topotype	Cochabamba	Lewis, Marko		Southern America	http://tun.fi/MY.110490	6	5		1382503671		Cold shady south facing cliff		1		4440 meters	H3016850	http://tun.fi/HR.188	Luomus	Depto. Cochabamba, Prov. Quillacollo/Prov. Chaparé/Prov. Ayopaya: Base of Serranias Tarucani in area of Laguna Tarucani	GX.22	-17.234 -66.401 WGS84	Herzog
PRESERVED_SPECIMEN	Brickellia coulteri A.Gray	SPECIES	none	http://coldb.mnhn.fr/catalognumber/mnhn/p/p02694907	P02694907	Brickellia	coulteri										P							http://coldb.mnhn.fr/catalognumber/mnhn/p/p02694907				2015-09-04														Plantae	Tracheophyta	Asterales	Asteraceae	Magnoliopsida	P
PRESERVED_SPECIMEN	Briza maxima L.	SPECIES	BE	http://www.botanicalcollections.be/specimen/BR0000011476405	BR0000011476405	Briza	maxima	Belgium	1890	1890-07-02	Hoevenen	Hennen J.					BR	2 juillet 1890						http://www.botanicalcollections.be/specimen/BR0000011476405	7	2		2012-07-19	S.N.								Meise Botanic Garden					Plantae	Tracheophyta	Poales	Poaceae	Liliopsida		ICBN
PRESERVED_SPECIMEN	Bromopsis erecta (Huds.) Fourr.	SPECIES	NL	http://data.biodiversitydata.nl/naturalis/specimen/L.2074481	L.2074481	Bromus	erecta	Netherlands	2011	2011-08-17	Eys, Eyserbosschen Piepert.	Slikke WJ van der; Beringen R		50.828567	5.920983	WGS84	L	2011/08/17		Limburg	Beringen R		EUROPE	L.2074481	8	17																Plantae	Tracheophyta	Poales	Poaceae	Liliopsida	Botany	ICN	Plantae|Magnoliopsidae|Poales|Gramineae
PRESERVED_SPECIMEN	Bromopsis inermis (Leyss.) Holub	SPECIES	NL	http://data.biodiversitydata.nl/naturalis/specimen/L.3065450	L.3065450	Bromus	inermis	Netherlands			Waaldijk bij Bommel.	Wttewaall J					L	1833/08/31 | 1833/08/01					EUROPE	L.3065450																		Plantae	Tracheophyta	Poales	Poaceae	Liliopsida	Botany	ICN	Plantae|Magnoliopsidae|Poales|Gramineae
PRESERVED_SPECIMEN	Bromus bromoideus (Lej.) Crép.	SPECIES	BE	http://www.botanicalcollections.be/specimen/BR0000011479499	BR0000011479499	Bromus	bromoideus	Belgium	1888	1888-07-01	Champs d'epeautre, Bonneville	Delhaise					BR	Juillet 1888						http://www.botanicalcollections.be/specimen/BR0000011479499	7			2017-05-31	S.N.								Meise Botanic Garden					Plantae	Tracheophyta	Poales	Poaceae	Liliopsida		ICBN
PRESERVED_SPECIMEN	Bromus bromoideus (Lej.) Crép.	SPECIES	BE	http://www.botanicalcollections.be/specimen/BR0000011479703	BR0000011479703	Bromus	bromoideus	Belgium	1896	1896-07-26	Moissons entre Soiron et Grand-Rechain	Halin - Dewez					BR	26/7 1896						http://www.botanicalcollections.be/specimen/BR0000011479703	7	26		2017-05-31	S.N.								Meise Botanic Garden					Plantae	Tracheophyta	Poales	Poaceae	Liliopsida		ICBN
PRESERVED_SPECIMEN	Bromus madritensis L.	SPECIES	BE	http://www.botanicalcollections.be/specimen/BR0000012450015	BR0000012450015	Bromus	madritensis	Belgium	2006	2006-06-03	La louvière, gare du Sud (NE-side), IFBL G4.33.31	Verloove F.					BR	03.06.2006						http://www.botanicalcollections.be/specimen/BR0000012450015	6	3		2012-04-20	6315								Meise Botanic Garden					Plantae	Tracheophyta	Poales	Poaceae	Liliopsida		ICBN
PRESERVED_SPECIMEN	Bromus racemosus L.	SPECIES	BE	http://www.botanicalcollections.be/specimen/BR0000010383834	BR0000010383834	Bromus	racemosus	Belgium	1928	1928-06-01	Waterloo	Lebrun J.					BR							http://www.botanicalcollections.be/specimen/BR0000010383834	6			2017-04-24	2558								Meise Botanic Garden					Plantae	Tracheophyta	Poales	Poaceae	Liliopsida		ICBN
PRESERVED_SPECIMEN	Bromus racemosus L.	SPECIES	BE	http://www.botanicalcollections.be/specimen/BR0000010561454	BR0000010561454	Bromus	racemosus	Belgium	1989	1989-06-23	Genk	Vannerom H.					BR							http://www.botanicalcollections.be/specimen/BR0000010561454	6	23		2017-04-24	890623.9								Meise Botanic Garden					Plantae	Tracheophyta	Poales	Poaceae	Liliopsida		ICBN
PRESERVED_SPECIMEN	Bromus racemosus L.	SPECIES	BE	http://www.botanicalcollections.be/specimen/BR0000012464456	BR0000012464456	Bromus	racemosus	Belgium	1864	1864-06-01	St. Trond	Vandenborn H.					BR							http://www.botanicalcollections.be/specimen/BR0000012464456	6			2017-04-24	S.N.								Meise Botanic Garden					Plantae	Tracheophyta	Poales	Poaceae	Liliopsida		ICBN
PRESERVED_SPECIMEN	Bromus secalinus L.	SPECIES	BE	http://www.botanicalcollections.be/specimen/BR0000012490110	BR0000012490110	Bromus	secalinus	Belgium	1885	1885-07-01	Nivelles	Dens G.					BR							http://www.botanicalcollections.be/specimen/BR0000012490110	7			2017-05-31	S.N.								Meise Botanic Garden					Plantae	Tracheophyta	Poales	Poaceae	Liliopsida		ICBN
PRESERVED_SPECIMEN	Bromus secalinus L.	SPECIES	EE	TU258798	TU258798	Bromus	secalinus	Estonia	1922	1922-07-16		Teodor Lipman					TU	1922-07-16			Teodor Lipman	1922-07-16T00:00:00.000+0000		TU258798	7	16				habitat: rukkipõllul					399.		Natural History Museum, University of Tartu		4			Plantae	Tracheophyta	Poales	Poaceae	Liliopsida	TU		Viridiplantae; Anthophyta; Monocotyledonae; Poales; Poaceae; Bromus
PRESERVED_SPECIMEN	Brosimum glaziovii Taub.	SPECIES	BR	http://specimens.kew.org/herbarium/K000947758	K000947758	Brosimum	glaziovii	Brazil	1950	1950-10-17	Nativa no Jardim Botânico.	Kuhlmann, M.					K				Berg, C.C.	1984-09-20T00:00:00.000+0000		K000947758	10	17		2014-04-17	3324		Dados não transcritos											Plantae	Tracheophyta	Rosales	Moraceae	Magnoliopsida	Herbarium		MORACEAE
PRESERVED_SPECIMEN	Bryum distantifolium Cardot & Thér.	species	CA	http://id.luomus.fi/HA.H3301689	HA.H3301689	Bryum	distantifolium	CA	1895	1895-01-01/1895-12-31	Wood Mountain	Macoun		49.23226	-106.50021	WGS84	H	1895	Isotype	Saskatchewan	Not on sheet		Northern America	http://tun.fi/MY.127786				1382504111				2e4	sp. nova		H3301689	http://tun.fi/HR.189		Assiniboia: Wood Mt.	GX.22	49.23226 -106.50021 WGS84 (20000m)	Cardot & Thér.
PRESERVED_SPECIMEN	Bryum subventricosum Broth.	species	AU	http://id.luomus.fi/HA.H3301752	HA.H3301752	Bryum	subventricosum	AU	1900	1900-01-01/1900-12-31		Forsyth bis, William (725)		35.77724	148.01137	WGS84	H	9/ 1900	Holotype	New South Wales	[Brotherus, Viktor Ferdinand]		Australasia	http://tun.fi/MY.128374			Tumbarumba	1382504115				2e4			H3301752	http://tun.fi/HR.189		N. S. Wales, Tumbarumba distr.	GX.22	35.77724 148.01137 WGS84 (20000m)	Broth.
PRESERVED_SPECIMEN	Bryum valparaisense Thériot, 1917	SPECIES	ES	http://data.rbge.org.uk/herb/E00205205	E00205205	Bryum	valparaisense	Spain	1974	1974-03-15	Tenerife, above Las Mercedes	During, H J					E	1974-03-15	ISOTYPE	Canary Islands				http://data.rbge.org.uk/herb/E00205205	3	15		2011-04-06	74362					800 M	BGBASE:216159	http://biocol.org/urn:lsid:biocol.org:col:15670						Plantae	Bryophyta	Bryales	Bryaceae	Bryopsida	E	ICBN
PRESERVED_SPECIMEN	Buchnera capitata Benth.	SPECIES	none	http://coldb.mnhn.fr/catalognumber/mnhn/p/p04410237	P04410237	Buchnera	capitata										P							http://coldb.mnhn.fr/catalognumber/mnhn/p/p04410237				2015-09-04														Plantae	Tracheophyta	Lamiales	Orobanchaceae	Magnoliopsida	P
PRESERVED_SPECIMEN	Buellia disciformis (Fr.) Mudd	SPECIES	GB	http://data.rbge.org.uk/herb/E00423198	E00423198	Buellia	disciformis	United Kingdom	2009	2009-09-01	Invertromie Wood	Ellis, Christopher J.					E	2009-09-01		Scotland				http://data.rbge.org.uk/herb/E00423198	9	1	(VC 96) Easterness	2015-11-11	L666						BGBASE:455840	http://biocol.org/urn:lsid:biocol.org:col:15670						Fungi	Ascomycota	Teloschistales	Physciaceae	Lecanoromycetes	E	ICBN
PRESERVED_SPECIMEN	Buglossoides arvensis (L.) I.M.Johnst.	SPECIES	EE	TU260572	TU260572	Buglossoides	arvensis	Estonia	1971	1971-06-09	Kassari kabeli juures	E. Tammemägi					TU	1971-06-09			Kaili Orav	2011-09-26T00:00:00.000+0000		TU260572	6	9	Hiiumaa			habitat: põllul							Natural History Museum, University of Tartu		4			Plantae	Tracheophyta	Boraginales	Boraginaceae	Magnoliopsida	TU		Viridiplantae; Anthophyta; Eudicotyledonae; Boraginales; Boraginaceae; Buglossoides
PRESERVED_SPECIMEN	Bulbostylis congolensis De Wild.	SPECIES	CF	http://coldb.mnhn.fr/catalognumber/mnhn/p/p00452747	P00452747	Bulbostylis	congolensis	Central African Republic	1921	1921-06-23		Le Testu, G.M.P.C.					P							http://coldb.mnhn.fr/catalognumber/mnhn/p/p00452747	6	23		2015-09-16			Endroits humides							Wadda : falaises de la Pipi				Plantae	Tracheophyta	Poales	Cyperaceae	Liliopsida	P
PRESERVED_SPECIMEN	Bunias orientalis L.	SPECIES	EE	TU278510	TU278510	Bunias	orientalis	Estonia	1971	1971-06-23	Tartu raj., Emajõe vasakkallas Aruküla koobaste juures.	Lea Voosalu					TU	1971-06-23			Lea Voosalu	1971-06-23T00:00:00.000+0000		TU278510	6	23				habitat: Liivasel rägal.							Natural History Museum, University of Tartu		4			Plantae	Tracheophyta	Brassicales	Brassicaceae	Magnoliopsida	TU		Viridiplantae; Anthophyta; Eudicotyledonae; Brassicales; Brassicaceae; Bunias
PRESERVED_SPECIMEN	Bupleurum pendikum Snogerup	species	TR	http://id.luomus.fi/HA.H1394748	HA.H1394748	Bupleurum	pendikum	TR	1991	1991-01-01/1991-12-31	Constantinopel. In collibus graminosis prope "Pendik".	Aznavour, G. V.					H		Isotype		Sven Snogerup	1991		http://tun.fi/MY.106310				1382503592							H1394748	http://tun.fi/HR.129	Luomus		GX.22		Snogerup
PRESERVED_SPECIMEN	Caesalpinia bonduc (L.) Roxb.	SPECIES	ID	http://data.biodiversitydata.nl/naturalis/specimen/L.1966079	L.1966079	Caesalpinia	bonduc	Indonesia	1979	1979-09-06	Rakata Besar, Pulau	Flenley JR; HW MF					L	1979/09/06		Java	Steenis CGGJ van	1987-06-01T00:00:00.000+0000	ASIA	L.1966079	9	6																Plantae	Tracheophyta	Fabales	Fabaceae	Magnoliopsida	Botany	ICN	Plantae|Magnoliopsidae|Fabales|Leguminosae-Caes.
PRESERVED_SPECIMEN	Calamus cheirophyllus J.Dransf. & W.J.Baker	SPECIES	PG	http://specimens.kew.org/herbarium/K000207860	K000207860	Calamus	cheirophyllus	Papua New Guinea	1972	1972-11-30	Karimui, Kundiawa subdist., Eastern Highlands District, Foothills of Mt. Karimui	Zieck, J.F.U.		-6.47	144.67	WGS84	K		HOLOTYPE					K000207860	11	30		2011-07-11	NGF36515	Open sunny secondary bush (old gardens).	Climbing rattan palm, height 4.5m, d.b.h. 6mm. Wood short staying rattan palm 6 leaflets palmate-like on top of 10cm long petiole. Flagellum. Ochrea 8cm, disintigrating into fibres. Clusters up to 50 shoots.	1										Plantae	Tracheophyta	Arecales	Arecaceae	Liliopsida	Herbarium		ARECACEAE
PRESERVED_SPECIMEN	Callithamnion corymbosum (J.E.Smith) Lyngbye	SPECIES	GB	http://data.rbge.org.uk/herb/E00704498	E00704498	Callithamnion	corymbosum	United Kingdom	1827	1827-01-01	Bute						E	1827		Scotland				http://data.rbge.org.uk/herb/E00704498			(VC 100) Clyde Isles	2015-05-07							BGBASE:725330	http://biocol.org/urn:lsid:biocol.org:col:15670						Plantae	Rhodophyta	Ceramiales	Callithamniaceae	Florideophyceae	E	ICBN
PRESERVED_SPECIMEN	Callithamnion Lyngbye, 1819	GENUS	GB	http://data.rbge.org.uk/herb/E00713634	E00713634	Callithamnion		United Kingdom	1967	1967-07-17	Bellhaven Point, Dunbar	Irvine, D.E.G.					E	1967-07-17		Scotland				http://data.rbge.org.uk/herb/E00713634	7	17	(VC 82) East Lothian	2015-07-16	1283						BGBASE:725555	http://biocol.org/urn:lsid:biocol.org:col:15670						Plantae	Rhodophyta	Ceramiales	Callithamniaceae	Florideophyceae	E	ICBN
PRESERVED_SPECIMEN	Callithamnion rupicolum C.L.Anderson	SPECIES	US	b6cb7599-aee3-4d46-91ae-225594ffa36c	BM000773782	Callithamnion	rupicolum	United States	1909	1909-12-01	Named Geo. Feature: Moss BeachParish: San Mateo County	Nathaniel Lyon Gardner					BM			California			NORTH_AMERICA	4817278	12				1648						NHMUK:ecatalogue:4817278							Plantae	Rhodophyta	Ceramiales	Callithamniaceae	Florideophyceae	BOT		Callithamniaceae
PRESERVED_SPECIMEN	Callitriche cophocarpa Sendtner	SPECIES	EE	TU262399	TU262399	Callitriche	cophocarpa	Estonia	1928	1928-07-25	Mõisaküla lähedal, Saate talust lõunas	T. Lippmaa					TU	1928-07-25			Andrey Shcherbakov	2018-01-18T00:00:00.000+0000		TU262399	7	25	Pärnu maakond			habitat: lodumets					4675.		Natural History Museum, University of Tartu		4			Plantae	Tracheophyta	Lamiales	Plantaginaceae	Magnoliopsida	TU		Viridiplantae; Anthophyta; Eudicotyledonae; Lamiales; Plantaginaceae; Callitriche
PRESERVED_SPECIMEN	Calochortus nuttallii Torr. & A.Gray	SPECIES	US	http://www.botanicalcollections.be/specimen/BR0000026835174V	BR0000026835174V	Calochortus	nuttallii	United States	1979	1979-07-01	Emigrant Peak, bij Squaw Valley, California, U.S.A., tussen steengruis, op helling	Hugo Borgoo					BR							http://www.botanicalcollections.be/specimen/BR0000026835174V	7			2017-07-31	17								Meise Botanic Garden					Plantae	Tracheophyta	Liliales	Liliaceae	Liliopsida		ICBN
PRESERVED_SPECIMEN	Caloplaca brunneola Wetmore	species	US	http://id.luomus.fi/HA.H9502487	HA.H9502487	Caloplaca	brunneola	US	1976	1976-07-05		Anderson, R. A.		46.820556	-93.948056	WGS84	H		Isotype	Minnesota	Vitikainen, Orvo	1995	Northern America	http://id.luomus.fi/MY.5318965	7	5	Cass County	1530276725	9678	Mixed forest, on Betula papyrifera.		1			H9502487	http://tun.fi/HR.85		Minnesota, U.S.A. Cass County: near Ben Draper Tower road, 0.8 km from Hwy 6, 11.6 km N of Outing.	GX.22	46.820556 -93.948056 WGS84	Wetmore
PRESERVED_SPECIMEN	Caloplaca volkii V.Wirth & Vězda	species		http://id.luomus.fi/HA.H9504528	HA.H9504528	Caloplaca	volkii		1974	1974-08-27		Volk, A.		-22.683333	14.533333	WGS84	H		Isotype				Africa	http://id.luomus.fi/MY.5315639	8	27		1530276676		Ad terram gypsaceam in desertis.		1			H9504528	http://tun.fi/HR.85		Africa Austro-Occidentalis. Swakopmund, 10 km in septentrione a Swakopmund.	GX.22	-22.683333 14.533333 WGS84	V.Wirth & Vězda
PRESERVED_SPECIMEN	Calpurnia glabrata Brummitt	SPECIES	ZA	http://specimens.kew.org/herbarium/K000555694	K000555694	Calpurnia	glabrata	South Africa	1957	1957-10-20	Swaziland, Mbabane	Compton, R.H.					K		HOLOTYPE		Brummitt, R.K.	1968-12-16T00:00:00.000+0000		K000555694	10	20		2010-01-14	27153		'Sheba's veil'. Small tree; yellow											Plantae	Tracheophyta	Fabales	Fabaceae	Magnoliopsida	Herbarium		LEGUMINOSAE-PAPILIONOIDEAE
PRESERVED_SPECIMEN	Caltha palustris L.	SPECIES	none	http://coldb.mnhn.fr/catalognumber/mnhn/p/p03185627	P03185627	Caltha	palustris										P							http://coldb.mnhn.fr/catalognumber/mnhn/p/p03185627				2015-09-04														Plantae	Tracheophyta	Ranunculales	Ranunculaceae	Magnoliopsida	P
PRESERVED_SPECIMEN	Calymperes decolorans Müll.Hal.	SPECIES	YT	http://coldb.mnhn.fr/catalognumber/mnhn/pc/pc0106597	PC0106597	Calymperes	decolorans	Mayotte	1847	1847-01-01		Boivin, L.H.					P		TYPE					http://coldb.mnhn.fr/catalognumber/mnhn/pc/pc0106597				2015-09-24										s.l.				Plantae	Bryophyta	Pottiales	Calymperaceae	Bryopsida	PC
PRESERVED_SPECIMEN	Calypogeia fauriana Steph.	SPECIES	JP	http://coldb.mnhn.fr/catalognumber/mnhn/pc/pc0102077	PC0102077	Calypogeia	fauriana	Japan	1905	1905-10-01		Faurie, U.					P		TYPE		Stephani			http://coldb.mnhn.fr/catalognumber/mnhn/pc/pc0102077	10			2015-09-26										Propre Aomori, ex balneis Jimbo				Plantae	Marchantiophyta	Jungermanniales	Calypogeiaceae	Jungermanniopsida	PC
PRESERVED_SPECIMEN	Calystegia silvatica Griseb.	SPECIES	GB	http://specimens.kew.org/herbarium/K000914310	K000914310	Calystegia	silvatica	United Kingdom	2008	2008-08-19	Kew Gardens; North Arboretum: amongst shrubs in a rough grassy area at the back of the Lower Nursery (zone 120)	Cope, T.A.					K				Cope, T.A.			K000914310	8	19		2013-09-12	RBG 227													Plantae	Tracheophyta	Solanales	Convolvulaceae	Magnoliopsida	Herbarium		CONVOLVULACEAE
PRESERVED_SPECIMEN	Calytrix variabilis Lindl.	SPECIES	AU	http://www.botanicalcollections.be/specimen/BR0000013091231	BR0000013091231	Calytrix	variabilis	Australia			regiones interioribus Australiae occidentalis	Preiss J.A.					BR	S.D.						http://www.botanicalcollections.be/specimen/BR0000013091231				2015-01-26	197								Meise Botanic Garden					Plantae	Tracheophyta	Myrtales	Myrtaceae	Magnoliopsida		ICBN
PRESERVED_SPECIMEN	Camellia pitardii var. yunnanica Sealy	VARIETY	CN	http://data.rbge.org.uk/herb/E00691340	E00691340	Camellia	pitardii	China					yunnanica				E							http://data.rbge.org.uk/herb/E00691340				2014-10-28							BGBASE:720221	http://biocol.org/urn:lsid:biocol.org:col:15670						Plantae	Tracheophyta	Ericales	Theaceae	Magnoliopsida	E	ICBN
PRESERVED_SPECIMEN	Campanula akguelii Altan	SPECIES	TR	http://data.rbge.org.uk/herb/E00128162	E00128162	Campanula	akguelii	Turkey	1989	1989-07-01		Y.Altan					E	1989-07-01	ISOTYPE	Bitlis				http://data.rbge.org.uk/herb/E00128162	7	1	Hizan	2008-05-09	4671					1550 M	BGBASE:134506	http://biocol.org/urn:lsid:biocol.org:col:15670						Plantae	Tracheophyta	Asterales	Campanulaceae	Magnoliopsida	E	ICBN
PRESERVED_SPECIMEN	Campanula barbata L.	SPECIES	FR	http://coldb.mnhn.fr/catalognumber/mnhn/p/p00163497	P00163497	Campanula	barbata	France	1837	1837-01-01		Schnizlein					P			39 Jura				http://coldb.mnhn.fr/catalognumber/mnhn/p/p00163497				2015-09-04										Le Reculet (Montagne du ...)				Plantae	Tracheophyta	Asterales	Campanulaceae	Magnoliopsida	P
PRESERVED_SPECIMEN	Campanula fenestrellata Feer	SPECIES	BE	http://www.botanicalcollections.be/specimen/BR0000005307753	BR0000005307753	Campanula	fenestrellata	Belgium	2002	2002-06-09	Humbeek - Sas	Ronse A.					BR							http://www.botanicalcollections.be/specimen/BR0000005307753	6	9		2010-09-13	264	muur van de vaart							Meise Botanic Garden					Plantae	Tracheophyta	Asterales	Campanulaceae	Magnoliopsida		ICBN
PRESERVED_SPECIMEN	Campanula glomerata L.	SPECIES	FR	http://coldb.mnhn.fr/catalognumber/mnhn/p/p02601367	P02601367	Campanula	glomerata	France	1949	1949-07-11	Creil	Jovet, P.					P			60 Oise	Fiala			http://coldb.mnhn.fr/catalognumber/mnhn/p/p02601367	7	11		2016-01-17										Seslerietum, immédiatement en aval du Parc de Creil				Plantae	Tracheophyta	Asterales	Campanulaceae	Magnoliopsida	P
PRESERVED_SPECIMEN	Campanula glomerata subsp. glomerata	SUBSPECIES	FR	http://coldb.mnhn.fr/catalognumber/mnhn/p/p00168597	P00168597	Campanula	glomerata	France	1864	1864-06-20		Delacour, T.	glomerata				P			84 Vaucluse				http://coldb.mnhn.fr/catalognumber/mnhn/p/p00168597	6	20	robion	2015-09-04										Robion : base nord du Lubéron, entre Robion et Maubec				Plantae	Tracheophyta	Asterales	Campanulaceae	Magnoliopsida	P
PRESERVED_SPECIMEN	Campanula macrorhiza J.Gay ex A.DC.	SPECIES	FR	http://coldb.mnhn.fr/catalognumber/mnhn/p/p00174417	P00174417	Campanula	macrorhiza	France	1827	1827-07-01		s.c.					P			84 Vaucluse	Reveillard			http://coldb.mnhn.fr/catalognumber/mnhn/p/p00174417	7			2015-09-04										Vaucluse				Plantae	Tracheophyta	Asterales	Campanulaceae	Magnoliopsida	P
PRESERVED_SPECIMEN	Campanula rotundifolia L.	SPECIES	NL	http://data.biodiversitydata.nl/naturalis/specimen/WAG.1278216	WAG.1278216	Campanula	rotundifolia	Netherlands			Bennekom.	Valckenier Suringar J					L	1892/08/31 | 1892/08/01					EUROPE	WAG.1278216																		Plantae	Tracheophyta	Asterales	Campanulaceae	Magnoliopsida	Botany	ICN	Plantae|Magnoliopsidae|Asterales|Campanulaceae
PRESERVED_SPECIMEN	Campsiandra chigo-montero Stergios	SPECIES	BR	http://specimens.kew.org/herbarium/K000841990	K000841990	Campsiandra	chigo-montero	Brazil	1966	1966-11-24	Road Humaitá to Labrea, km 90.	Ramos, J.F.; Pena, B.S.; Prance, G.T.					K				Stergios, B.			K000841990	11	24		2012-11-29	3281	Low forest on terra firme	Treelet, 7m. tall. Pods green.											Plantae	Tracheophyta	Fabales	Fabaceae	Magnoliopsida	Herbarium		LEGUMINOSAE-CAESALPINIOIDEAE
PRESERVED_SPECIMEN	Campsiandra comosa var. surinamensis Stergios	VARIETY	SR	http://data.biodiversitydata.nl/naturalis/specimen/U%20%200003194	U 0003194	Campsiandra	comosa	Suriname	1916	1916-10-22	fl. Corantijn pr. Apoera	Stahel G	surinamensis				L	1916/10/22	HOLOTYPE		Stergios B		SOUTH_AMERICA	U 0003194	10	22																Plantae	Tracheophyta	Fabales	Fabaceae	Magnoliopsida	Botany	ICN	Plantae|Magnoliopsidae|Fabales|Leguminosae-Caes.
PRESERVED_SPECIMEN	Campylopus atrovirens var. gracilis Dixon	VARIETY	GB	http://data.rbge.org.uk/herb/E00625536	E00625536	Campylopus	atrovirens	United Kingdom	1901	1901-07-13	Roadside near Talsarnau Maentwrog Valley	Jones, Daniel A.	gracilis				E	1901-07-13	ISOSYNTYPE	Wales				http://data.rbge.org.uk/herb/E00625536	7	13	(VC 48) Merioneth	2014-08-07							BGBASE:655559	http://biocol.org/urn:lsid:biocol.org:col:15670						Plantae	Bryophyta	Dicranales	Dicranaceae	Bryopsida	E	ICBN
PRESERVED_SPECIMEN	Capsella bursa-pastoris Medik.	SPECIES	BE	http://www.botanicalcollections.be/specimen/BR0000025601466V	BR0000025601466V	Capsella	bursa-pastoris	Belgium	1971	1971-04-23	Wezembeek	Deronde L.					BR							http://www.botanicalcollections.be/specimen/BR0000025601466V	4	23		2017-06-06	S.N.								Meise Botanic Garden					Plantae	Tracheophyta	Brassicales	Brassicaceae	Magnoliopsida		ICBN
PRESERVED_SPECIMEN	Cardamine hirsuta L.	SPECIES	EE	TU253563	TU253563	Cardamine	hirsuta	Estonia	1971	1971-06-15	Hanikatsi laiul	M. Kask | E. Tammemägi					TU	1971-06-15			E. Tammemägi | M. Kask	1971-06-15T00:00:00.000+0000		TU253563	6	15	Hiiu maakond			habitat: mererannal adrupeenral							Natural History Museum, University of Tartu		4			Plantae	Tracheophyta	Brassicales	Brassicaceae	Magnoliopsida	TU		Viridiplantae; Anthophyta; Eudicotyledonae; Brassicales; Brassicaceae; Cardamine
PRESERVED_SPECIMEN	Carduus crispus L.	SPECIES	GB	http://specimens.kew.org/herbarium/K000914401	K000914401	Carduus	crispus	United Kingdom	2008	2008-07-14	Kew Gardens; South Arboretum	Cope, T.A.		51.48	-0.31	WGS84	K				Cope, T.A.			K000914401	7	14		2014-01-21	RBG 163	on the edge of the Brick Pit in the Conservation Area (zone 310, OS monad 17.76)												Plantae	Tracheophyta	Asterales	Asteraceae	Magnoliopsida	Herbarium		COMPOSITAE
PRESERVED_SPECIMEN	Carduus defloratus L.	SPECIES	FR	http://coldb.mnhn.fr/catalognumber/mnhn/p/p00041137	P00041137	Carduus	defloratus	France	1979	1979-08-17		Sag, G.					P			05 Hautes-Alpes	Sag			http://coldb.mnhn.fr/catalognumber/mnhn/p/p00041137	8	17	Orcières	2015-09-04										Orcières : Les Audiberts : Serre Lunel				Plantae	Tracheophyta	Asterales	Asteraceae	Magnoliopsida	P
PRESERVED_SPECIMEN	Carex basilaris Jord.	SPECIES	none	http://coldb.mnhn.fr/catalognumber/mnhn/p/p01683407	P01683407	Carex	basilaris										P							http://coldb.mnhn.fr/catalognumber/mnhn/p/p01683407				2015-09-03														Plantae	Tracheophyta	Poales	Cyperaceae	Liliopsida	P
PRESERVED_SPECIMEN	Carex canescens L.	SPECIES	EE	TU258503	TU258503	Carex	canescens	Estonia	2008	2008-07-20	Leidissoo	Laura Kütt					TU	2008-07-20			Tõnu Ploompuu			TU258503	7	20	Lääne-Viru maakond			habitat: õõtsik-madalsoo							Natural History Museum, University of Tartu		4			Plantae	Tracheophyta	Poales	Cyperaceae	Liliopsida	TU		Viridiplantae; Anthophyta; Monocotyledonae; Poales; Cyperaceae; Carex
PRESERVED_SPECIMEN	Carex canescens L.	SPECIES	EE	TU262052	TU262052	Carex	canescens	Estonia	2008	2008-06-12	Kääpa, Särgjärve ümbrus	Mare Toom					TU	2008-06-12			Mare Toom	2008-06-12T00:00:00.000+0000		TU262052	6	12	Jõgeva maakond										Natural History Museum, University of Tartu		4			Plantae	Tracheophyta	Poales	Cyperaceae	Liliopsida	TU		Viridiplantae; Anthophyta; Monocotyledonae; Poales; Cyperaceae; Carex
PRESERVED_SPECIMEN	Carex cespitosa L.	SPECIES	GB	0303eff1-b9d5-42fe-99d1-678d95f64de6	BM000939135	Carex	cespitosa	United Kingdom	1960	1960-05-29		John George Dony		52.103977	-2.746062	WGS84	BM			England	John George Dony		EUROPE	742685	5	29		2017-10-13	3815						NHMUK:ecatalogue:742685							Plantae	Tracheophyta	Poales	Cyperaceae	Liliopsida	BOT		Cyperaceae
PRESERVED_SPECIMEN	Carex clavata Thunb.	SPECIES	ZA	http://specimens.kew.org/herbarium/K000363593	K000363593	Carex	clavata	South Africa	1827	1827-11-26	Paarl Mountains, Paarl Div.	Drege					K		ISOTYPE		Reid, C.			K000363593	11	26		2006-04-12	153													Plantae	Tracheophyta	Poales	Cyperaceae	Liliopsida	Herbarium		CYPERACEAE
PRESERVED_SPECIMEN	Carex diandra Schrank	SPECIES	EE	TU276259	TU276259	Carex	diandra	Estonia	1956	1956-06-27	E inf, Lihula rajoon, Tuhu	E. Lellep					TU	1956-06-27			E. Lellep	1956-06-27T00:00:00.000+0000		TU276259	6	27				habitat: soos							Natural History Museum, University of Tartu		4			Plantae	Tracheophyta	Poales	Cyperaceae	Liliopsida	TU		Viridiplantae; Anthophyta; Monocotyledonae; Poales; Cyperaceae; Carex
PRESERVED_SPECIMEN	Carex disperma Dewey	SPECIES	EE	TU251451	TU251451	Carex	disperma	Estonia	1926	1926-06-18		W. Reinthal					TU	1926-06-18			Kaili Orav	2008-07-16T00:00:00.000+0000		TU251451	6	18				habitat: In silva humida et umbrosa mixta (=niiskes ja varjulises segametsas)							Natural History Museum, University of Tartu		4			Plantae	Tracheophyta	Poales	Cyperaceae	Liliopsida	TU		Viridiplantae; Anthophyta; Monocotyledonae; Poales; Cyperaceae; Carex
PRESERVED_SPECIMEN	Carex disperma Dewey	SPECIES	EE	TU251470	TU251470	Carex	disperma	Estonia	1887	1887-05-26		K. Krumins					TU	1887-05-26			Kaili Orav	2008-07-17T00:00:00.000+0000		TU251470	5	26				habitat: nasser Wald (=märg mets)							Natural History Museum, University of Tartu		4			Plantae	Tracheophyta	Poales	Cyperaceae	Liliopsida	TU		Viridiplantae; Anthophyta; Monocotyledonae; Poales; Cyperaceae; Carex
PRESERVED_SPECIMEN	Carex elata subsp. omskiana (Meinsh.) Jalas	SUBSPECIES	EE	TU262086	TU262086	Carex	elata	Estonia	2007	2007-05-20	Endla raba, laudtee äärses	Jaan Liira	omskiana				TU	2007-05-20			Mare Toom			TU262086	5	20	Tartu maakond			habitat: metsas							Natural History Museum, University of Tartu		4			Plantae	Tracheophyta	Poales	Cyperaceae	Liliopsida	TU		Viridiplantae; Anthophyta; Monocotyledonae; Poales; Cyperaceae; Carex
PRESERVED_SPECIMEN	Carex ericetorum Pollich	SPECIES	GB	38a8a8e3-6f22-40b8-880d-770e76ccbfb5	BM000954587	Carex	ericetorum	United Kingdom	1888	1888-05-09		Edward Shearburn Marshall		52.22191	0.72075	WGS84	BM			England			EUROPE	2293019	5	9			s.n.						NHMUK:ecatalogue:2293019							Plantae	Tracheophyta	Poales	Cyperaceae	Liliopsida	BOT		Cyperaceae
PRESERVED_SPECIMEN	Carex flava L.	SPECIES	EE	TU303445	TU303445	Carex	flava	Estonia	1904	1904-08-20	Tammist (=Tammiste)						TU	1904-08-20			K. Eichwald	1963-01-01T00:00:00.000+0000		TU303445	8	20				habitat: Nido (=Niidu), graben des neuen weges des nach Tammist führt (=kraavis teel Tammistesse)							Natural History Museum, University of Tartu		4			Plantae	Tracheophyta	Poales	Cyperaceae	Liliopsida	TU		Viridiplantae; Anthophyta; Monocotyledonae; Poales; Cyperaceae; Carex
PRESERVED_SPECIMEN	Carex flava L.	SPECIES	EE	TU303584	TU303584	Carex	flava	Estonia	1971	1971-07-10	Jõgeva raj, Kuremaa	H. Jäär					TU	1971-07-10			H. Jäär	1971-07-10T00:00:00.000+0000		TU303584	7	10				habitat: järve lõunakaldast 10 m							Natural History Museum, University of Tartu		4			Plantae	Tracheophyta	Poales	Cyperaceae	Liliopsida	TU		Viridiplantae; Anthophyta; Monocotyledonae; Poales; Cyperaceae; Carex
PRESERVED_SPECIMEN	Carex goodenowii J.Gay	SPECIES	EE	TU303682	TU303682	Carex	goodenowii	Estonia	1958	1958-07-16	Pärnust lõunas Rannaküla ja Tahku vahel	L. Pihlapuu					TU	1958-07-16			L. Pihlapuu	1958-07-16T00:00:00.000+0000		TU303682	7	16				habitat: rannaniidul							Natural History Museum, University of Tartu		4			Plantae	Tracheophyta	Poales	Cyperaceae	Liliopsida	TU		Viridiplantae; Anthophyta; Monocotyledonae; Poales; Cyperaceae; Carex
PRESERVED_SPECIMEN	Carex hartmanii Cajander	species	SE	http://id.luomus.fi/HA.H1003478	HA.H1003478	Carex	hartmanii	SE	1972	1972-01-01/1972-12-31	Gotland: Ardre, Helgmyr.	Englund, B.					H		Lectotype		Aarno Kalela	1972		http://tun.fi/MY.101176				1382503558							H1003478	http://tun.fi/HR.129	Luomus		GX.22		Cajander
PRESERVED_SPECIMEN	Carex hirta L.	SPECIES	BE	http://www.botanicalcollections.be/specimen/BR0000025383805V	BR0000025383805V	Carex	hirta	Belgium	1981	1981-06-18	Meerbeek (Brabant)	Luk De Ronde					BR							http://www.botanicalcollections.be/specimen/BR0000025383805V	6	18		2017-05-03	S.N.								Meise Botanic Garden					Plantae	Tracheophyta	Poales	Cyperaceae	Liliopsida		ICBN
PRESERVED_SPECIMEN	Carex L.	GENUS	CN	http://data.rbge.org.uk/herb/E00134418	E00134418	Carex		China	1997	1997-07-18	Above Maixiu Forestry Centre, Langzhang Valley.	Sino-British Qinghai Expedition 1997		35.265	101.889444	WGS84	E	1997-07-18		Qinghai				http://data.rbge.org.uk/herb/E00134418	7	18	Huangnan Zang Aut. Pref.	2001-07-11	869					3180 M	BGBASE:82587	http://biocol.org/urn:lsid:biocol.org:col:15670						Plantae	Tracheophyta	Poales	Cyperaceae	Liliopsida	E	ICBN
PRESERVED_SPECIMEN	Carex lenta D.Don	SPECIES	CN	http://data.rbge.org.uk/herb/E00113189	E00113189	Carex	lenta	China	1997	1997-09-30	Salween tributary along 'First School Valley' west of Fugong	Gaoligong Shan Expedition 1997		26.9	98.85	WGS84	E	1997-09-30		Yunnan				http://data.rbge.org.uk/herb/E00113189	9	30	Nujiang Lisu Aut. Pref.	2000-08-21	9769					1600-1700 M	BGBASE:73373	http://biocol.org/urn:lsid:biocol.org:col:15670						Plantae	Tracheophyta	Poales	Cyperaceae	Liliopsida	E	ICBN
PRESERVED_SPECIMEN	Carex lepidocarpa Tausch	SPECIES	EE	TU262223	TU262223	Carex	lepidocarpa	Estonia	2006	2006-07-26	Kõlleste	Mare Toom					TU	2006-07-26			Mare Toom	2006-07-26T00:00:00.000+0000		TU262223	7	26	Põlva maakond			habitat: lammisoo							Natural History Museum, University of Tartu		4			Plantae	Tracheophyta	Poales	Cyperaceae	Liliopsida	TU		Viridiplantae; Anthophyta; Monocotyledonae; Poales; Cyperaceae; Carex
PRESERVED_SPECIMEN	Carex leporina L.	SPECIES	EE	TU275129	TU275129	Carex	leporina	Estonia	1960	1960-06-28	Lohkva tee ääres, Tartust ca 0,5 km	V. Lilleleht					TU	1960-06-28			V. Lilleleht	1960-06-28T00:00:00.000+0000		TU275129	6	28				habitat: niit							Natural History Museum, University of Tartu		4			Plantae	Tracheophyta	Poales	Cyperaceae	Liliopsida	TU		Viridiplantae; Anthophyta; Monocotyledonae; Poales; Cyperaceae; Carex
PRESERVED_SPECIMEN	Carex lupulina Muhl. ex Schkuhr	SPECIES	US	http://www.botanicalcollections.be/specimen/BR0000025289930	BR0000025289930	Carex	lupulina	United States	1832	1832-07-01	Bethlehem	Wied M.					BR							http://www.botanicalcollections.be/specimen/BR0000025289930	7			2017-03-06	S.N.								Meise Botanic Garden					Plantae	Tracheophyta	Poales	Cyperaceae	Liliopsida		ICBN
PRESERVED_SPECIMEN	Carex maritima Gunnerus	SPECIES	GB	4731a95e-6449-46a6-8fe2-670eda5c4dac	BM000909966	Carex	maritima	United Kingdom	1971	1971-07-14		Anthony Clive Jermy		58.430068	-3.464001	WGS84	BM			Scotland			EUROPE	4869064	7	14			8848	in dune flat with possible high winter water table					NHMUK:ecatalogue:4869064							Plantae	Tracheophyta	Poales	Cyperaceae	Liliopsida	BOT		Cyperaceae
PRESERVED_SPECIMEN	Carex nigra Reich.	SPECIES	BE	http://www.botanicalcollections.be/specimen/BR0000025383867V	BR0000025383867V	Carex	nigra	Belgium	1977	1977-05-08	St-Job (Prov. Antwerpen)	Jos Bijnens et al.					BR							http://www.botanicalcollections.be/specimen/BR0000025383867V	5	8		2017-05-03	108								Meise Botanic Garden					Plantae	Tracheophyta	Poales	Cyperaceae	Liliopsida		ICBN
PRESERVED_SPECIMEN	Carex nigra Reich.	SPECIES	EE	TU303730	TU303730	Carex	nigra	Estonia	1972	1972-07-13	Tartu rajoon, Tähtvere metskond	Ü. Paeväli					TU	1972-07-13			Ü. Paeväli	1972-07-13T00:00:00.000+0000		TU303730	7	13				habitat: soo serv							Natural History Museum, University of Tartu		4			Plantae	Tracheophyta	Poales	Cyperaceae	Liliopsida	TU		Viridiplantae; Anthophyta; Monocotyledonae; Poales; Cyperaceae; Carex
PRESERVED_SPECIMEN	Carex nigra Reich.	SPECIES	EE	TU303780	TU303780	Carex	nigra	Estonia	1971	1971-06-27	Põlva raj., Taevaskoja, Valgesoo veski juures	Lea Voosalu					TU	1971-06-27			Lea Voosalu	1971-06-27T00:00:00.000+0000		TU303780	6	27				habitat: Ahja jõe luhas (sängiservne luht)							Natural History Museum, University of Tartu		4			Plantae	Tracheophyta	Poales	Cyperaceae	Liliopsida	TU		Viridiplantae; Anthophyta; Monocotyledonae; Poales; Cyperaceae; Carex
PRESERVED_SPECIMEN	Carex nigra Reich.	SPECIES	EE	TU303840	TU303840	Carex	nigra	Estonia	1973	1973-06-23	Võru rajoon, Luutsniku	L. Ruusing					TU	1973-06-23			L. Ruusing	1973-06-23T00:00:00.000+0000		TU303840	6	23				habitat: niit koolimajast 0,5 km lõunas							Natural History Museum, University of Tartu		4			Plantae	Tracheophyta	Poales	Cyperaceae	Liliopsida	TU		Viridiplantae; Anthophyta; Monocotyledonae; Poales; Cyperaceae; Carex
PRESERVED_SPECIMEN	Carex nigra Reich.	SPECIES	NL	http://data.biodiversitydata.nl/naturalis/specimen/L.2074347	L.2074347	Carex	nigra	Netherlands	2011	2011-06-10	Venlo, Zwart Water.	Weeda EJ		51.399333	6.184083	WGS84	L	2011/06/10		Limburg	Weeda EJ		EUROPE	L.2074347	6	10																Plantae	Tracheophyta	Poales	Cyperaceae	Liliopsida	Botany	ICN	Plantae|Magnoliopsidae|Poales|Cyperaceae
PRESERVED_SPECIMEN	Carex oederi Retz.	SPECIES	EE	TU277653	TU277653	Carex	oederi	Estonia	1961	1961-06-13	Loode-Eesti, Hanila Mõisaküla.	L. Pihlapuu					TU	1961-06-13			L. Pihlapuu	1961-06-13T00:00:00.000+0000		TU277653	6	13				habitat: Mereäärses kadastikus lohus.			Carex oederi Retz.				Natural History Museum, University of Tartu		4			Plantae	Tracheophyta	Poales	Cyperaceae	Liliopsida	TU		Viridiplantae; Anthophyta; Monocotyledonae; Poales; Cyperaceae; Carex
PRESERVED_SPECIMEN	Carex oederi Retz.	SPECIES	EE	TU277666	TU277666	Carex	oederi	Estonia	1974	1974-07-05	Haapsalu raj., Matsalu RLK-ala, Penijõe prooviala.	M. Ratas					TU	1974-07-05			M. Ratas	1974-07-05T00:00:00.000+0000		TU277666	7	5				habitat: C. elata mätastiku servas niiskel hõredalt taimistunud laigul.			Carex Oederi Retz.				Natural History Museum, University of Tartu		4			Plantae	Tracheophyta	Poales	Cyperaceae	Liliopsida	TU		Viridiplantae; Anthophyta; Monocotyledonae; Poales; Cyperaceae; Carex
PRESERVED_SPECIMEN	Carex otrubae Podp.	SPECIES	EE	TU271167	TU271167	Carex	otrubae	Estonia	1928	1928-06-17	Manilaid	T. Lippmaa					TU	1928-06-17			H. Zingel			TU271167	6	17				habitat: mereäärne niit					3027.		Natural History Museum, University of Tartu		4			Plantae	Tracheophyta	Poales	Cyperaceae	Liliopsida	TU		Viridiplantae; Anthophyta; Monocotyledonae; Poales; Cyperaceae; Carex
PRESERVED_SPECIMEN	Carex paniculata L.	SPECIES	EE	TU262203	TU262203	Carex	paniculata	Estonia	2006	2006-07-26	Kõlleste	Mare Toom					TU	2006-07-26			Mare Toom	2006-07-26T00:00:00.000+0000		TU262203	7	26	Põlva maakond			habitat: lammisoo							Natural History Museum, University of Tartu		4			Plantae	Tracheophyta	Poales	Cyperaceae	Liliopsida	TU		Viridiplantae; Anthophyta; Monocotyledonae; Poales; Cyperaceae; Carex
PRESERVED_SPECIMEN	Carex pedata L.	SPECIES	EE	TU277837	TU277837	Carex	pedata	Estonia	1924	1924-06-26	Saaremaa, Viidumäe.	K. Eichwald					TU	1924-06-26			K. Eichwald	1924-06-26T00:00:00.000+0000		TU277837	6	26				habitat: Niiskel heinamaa nõlval.							Natural History Museum, University of Tartu		4			Plantae	Tracheophyta	Poales	Cyperaceae	Liliopsida	TU		Viridiplantae; Anthophyta; Monocotyledonae; Poales; Cyperaceae; Carex
PRESERVED_SPECIMEN	Carex pilulifera L.	SPECIES	BE	http://www.botanicalcollections.be/specimen/BR0000011230489	BR0000011230489	Carex	pilulifera	Belgium	1864	1864-06-01	La Hulpe	Bommer					BR							http://www.botanicalcollections.be/specimen/BR0000011230489	6			2017-06-07	S.N.								Meise Botanic Garden					Plantae	Tracheophyta	Poales	Cyperaceae	Liliopsida		ICBN
PRESERVED_SPECIMEN	Carex praecox Schreb.	SPECIES	EE	TU277391	TU277391	Carex	praecox	Estonia	1937	1937-06-25	Estonia orientalis, umb. 1 km Ratsimäe peatuskohast Valga poole, vahimaja 517 kohal raudteel.	K. Eichwald					TU	1937-06-25			K. Eichwald	1937-06-25T00:00:00.000+0000		TU277391	6	25											Natural History Museum, University of Tartu		4			Plantae	Tracheophyta	Poales	Cyperaceae	Liliopsida	TU		Viridiplantae; Anthophyta; Monocotyledonae; Poales; Cyperaceae; Carex
PRESERVED_SPECIMEN	Carex remota L.	SPECIES	EE	TU260794	TU260794	Carex	remota	Estonia	1972	1972-07-23	Kõrgessaare metsk. kv. 97	V. Järviste | E. Varjend					TU	1972-07-23			E. Varjend | V. Järviste	1972-07-23T00:00:00.000+0000		TU260794	7	23	Hiiumaa			habitat: lodumetsas							Natural History Museum, University of Tartu		4			Plantae	Tracheophyta	Poales	Cyperaceae	Liliopsida	TU		Viridiplantae; Anthophyta; Monocotyledonae; Poales; Cyperaceae; Carex
PRESERVED_SPECIMEN	Carex remota L.	SPECIES	EE	TU260818	TU260818	Carex	remota	Estonia	1938	1938-07-27	Estonia orientalis, Helme khk., Riidaja Morse külast lõunas	K. Eichwald					TU	1938-07-27			K. Eichwald	1938-07-27T00:00:00.000+0000		TU260818	7	27				habitat: lodumetsas					4009.		Natural History Museum, University of Tartu		4			Plantae	Tracheophyta	Poales	Cyperaceae	Liliopsida	TU		Viridiplantae; Anthophyta; Monocotyledonae; Poales; Cyperaceae; Carex
PRESERVED_SPECIMEN	Carex rostrata Stokes	SPECIES	EE	TU303394	TU303394	Carex	rostrata	Estonia	1906	1906-07-30	Jepern (=Jõõpre)						TU	1906-07-30				1906-07-30T00:00:00.000+0000		TU303394	7	30				habitat: südliches ufer des lavasaar - sees (=järve lõuna kaldal)							Natural History Museum, University of Tartu		4			Plantae	Tracheophyta	Poales	Cyperaceae	Liliopsida	TU		Viridiplantae; Anthophyta; Monocotyledonae; Poales; Cyperaceae; Carex
PRESERVED_SPECIMEN	Carex salina Wahlenb.	SPECIES	GB	1b4ee5f4-da73-457a-b1b1-d0f39b594dbe	BM000908904	Carex	salina	United Kingdom	1920	1920-08-01		George Claridge Druce; b.1850; d.1932; Druce		58.430068	-3.464001	WGS84	BM			Scotland			EUROPE	4867545	8				2599						NHMUK:ecatalogue:4867545							Plantae	Tracheophyta	Poales	Cyperaceae	Liliopsida	BOT		Cyperaceae
PRESERVED_SPECIMEN	Carex scolopendriformis F.T.Wang & Tang ex P.C.Li	SPECIES	CN	http://data.rbge.org.uk/herb/E00693571	E00693571	Carex	scolopendriformis	China	1985	1985-06-01		Kunming/Edinburgh Yulong Shan Expedition (1985)					E	1985-06-01						http://data.rbge.org.uk/herb/E00693571	6	1		2014-05-19	446						BGBASE:708797	http://biocol.org/urn:lsid:biocol.org:col:15670						Plantae	Tracheophyta	Poales	Cyperaceae	Liliopsida	E	ICBN
PRESERVED_SPECIMEN	Carex spicata Huds.	SPECIES	NL	http://data.biodiversitydata.nl/naturalis/specimen/L.2074028	L.2074028	Carex	spicata	Netherlands	2011	2011-06-21	Sliedrechtse Biesbosch, Kop van den Ouden Wiel.	Weeda EJ		51.816083	4.878917	WGS84	L	2011/06/21		Zuid-Holland	Weeda EJ		EUROPE	L.2074028	6	21																Plantae	Tracheophyta	Poales	Cyperaceae	Liliopsida	Botany	ICN	Plantae|Magnoliopsidae|Poales|Cyperaceae
PRESERVED_SPECIMEN	Carex sylvatica Huds.	SPECIES	GB	http://data.rbge.org.uk/herb/E00074915	E00074915	Carex	sylvatica	United Kingdom	1936	1936-06-13		Mackechnie, R.					E	1936-06-13		Scotland				http://data.rbge.org.uk/herb/E00074915	6	13	(VC 77) Lanarkshire	2013-12-26							BGBASE:82031	http://biocol.org/urn:lsid:biocol.org:col:15670						Plantae	Tracheophyta	Poales	Cyperaceae	Liliopsida	E	ICBN
PRESERVED_SPECIMEN	Carex viridula var. pulchella (Lönnr.) B.Schmid	VARIETY	EE	TU262031	TU262031	Carex	viridula	Estonia	2009	2009-06-20	Vesiku oja juures	Lisanna Schmidt	pulchella	58.33639	21.98694	WGS84	TU	2009-06-20			Lisanna Schmidt	2009-06-20T00:00:00.000+0000		TU262031	6	20	Saare maakond			habitat: niiskel niidul					[2.165]		Natural History Museum, University of Tartu		4			Plantae	Tracheophyta	Poales	Cyperaceae	Liliopsida	TU		Viridiplantae; Anthophyta; Monocotyledonae; Poales; Cyperaceae; Carex
PRESERVED_SPECIMEN	Carex viridula var. pulchella (Lönnr.) B.Schmid	VARIETY	EE	TU262137	TU262137	Carex	viridula	Estonia	2009	2009-06-20	Vesiku oja juures	Lisanna Schmidt	pulchella	58.33639	21.98694	WGS84	TU	2009-06-20			Mare Toom | Lisanna Schmidt	2010-01-01T00:00:00.000+0000		TU262137	6	20	Saare maakond			habitat: niiskel niidul					[2.161]		Natural History Museum, University of Tartu		4			Plantae	Tracheophyta	Poales	Cyperaceae	Liliopsida	TU		Viridiplantae; Anthophyta; Monocotyledonae; Poales; Cyperaceae; Carex
PRESERVED_SPECIMEN	Carex viridula var. viridula	VARIETY	EE	TU262028	TU262028	Carex	viridula	Estonia	2009	2009-06-20	Hindu külas, tee kõrval	Lisanna Schmidt	viridula	58.09278	22.17806	WGS84	TU	2009-06-20			Mare Toom | Lisanna Schmidt	2010-01-01T00:00:00.000+0000		TU262028	6	20	Saare maakond			habitat: niiskel niidul, ajutistes lompides					[1.181]		Natural History Museum, University of Tartu		4			Plantae	Tracheophyta	Poales	Cyperaceae	Liliopsida	TU		Viridiplantae; Anthophyta; Monocotyledonae; Poales; Cyperaceae; Carex
PRESERVED_SPECIMEN	Carex viridula var. viridula	VARIETY	EE	TU262103	TU262103	Carex	viridula	Estonia	2009	2009-06-17	Paatsa oja juures	Lisanna Schmidt	viridula	58.50111	22.30333	WGS84	TU	2009-06-17			Lisanna Schmidt	2009-06-17T00:00:00.000+0000		TU262103	6	17	Saare maakond			habitat: metsa kõrval soos					[1.41]		Natural History Museum, University of Tartu		4			Plantae	Tracheophyta	Poales	Cyperaceae	Liliopsida	TU		Viridiplantae; Anthophyta; Monocotyledonae; Poales; Cyperaceae; Carex
PRESERVED_SPECIMEN	Carex viridula var. viridula	VARIETY	EE	TU262125	TU262125	Carex	viridula	Estonia	2009	2009-06-19	Kuusnõmme poolsaarel	Lisanna Schmidt	viridula	58.34028	21.96833	WGS84	TU	2009-06-19			Mare Toom | Lisanna Schmidt	2010-01-01T00:00:00.000+0000		TU262125	6	19	Saare maakond			habitat: niiskel niidul					[1.115]		Natural History Museum, University of Tartu		4			Plantae	Tracheophyta	Poales	Cyperaceae	Liliopsida	TU		Viridiplantae; Anthophyta; Monocotyledonae; Poales; Cyperaceae; Carex
PRESERVED_SPECIMEN	Carex viridula var. viridula	VARIETY	EE	TU262135	TU262135	Carex	viridula	Estonia	2009	2009-06-19	Kuusnõmme poolsaarel	Lisanna Schmidt	viridula	58.34028	21.96833	WGS84	TU	2009-06-19			Lisanna Schmidt	2009-06-19T00:00:00.000+0000		TU262135	6	19	Saare maakond			habitat: niiskel niidul					[1.117]		Natural History Museum, University of Tartu		4			Plantae	Tracheophyta	Poales	Cyperaceae	Liliopsida	TU		Viridiplantae; Anthophyta; Monocotyledonae; Poales; Cyperaceae; Carex
PRESERVED_SPECIMEN	Caryocar microcarpum Ducke	SPECIES	GY	http://specimens.kew.org/herbarium/K000432519	K000432519	Caryocar	microcarpum	Guyana	1937	1937-11-21	Basin of Kuyuwini River (Essequibo tributary), about 150 miles from mouth.	Smith, A.C.					K		ISOTYPE		Prance, G.T.			K000432519	11	21		2011-06-08	3034	Dense forest.												Plantae	Tracheophyta	Malpighiales	Caryocaraceae	Magnoliopsida	Herbarium		CARYOCARACEAE
PRESERVED_SPECIMEN	Cassiope pectinata Stapf	SPECIES	CN	http://data.rbge.org.uk/herb/E00286028	E00286028	Cassiope	pectinata	China	1928	1928-01-01		Rock, J.F.					E	1928						http://data.rbge.org.uk/herb/E00286028				2008-08-20	16964						BGBASE:292998	http://biocol.org/urn:lsid:biocol.org:col:15670						Plantae	Tracheophyta	Ericales	Ericaceae	Magnoliopsida	E	ICBN
PRESERVED_SPECIMEN	Cassipourea ndambiana Breteler	SPECIES	GA	http://www.botanicalcollections.be/specimen/BR0000013860288	BR0000013860288	Cassipourea	ndambiana	Gabon	1993	1993-11-27	c. 70 km E of Lastoursville, E of Ndambi	Breteler F.J., Breteler B. & Klein Breteler		-0.783333	13.366667	WGS84	BR		ISOTYPE					http://www.botanicalcollections.be/specimen/BR0000013860288	11	27		2015-03-10	12377								Meise Botanic Garden					Plantae	Tracheophyta	Malpighiales	Rhizophoraceae	Magnoliopsida		ICBN
PRESERVED_SPECIMEN	Cassipourea ruwensorensis Alston	SPECIES	CD	http://www.botanicalcollections.be/specimen/BR0000008976314	BR0000008976314	Cassipourea	ruwensorensis	Congo, Democratic Republic of the	1914	1914-03-23	Lesse	Bequaert J.		0.75	29.766667	WGS84	BR		TYPE					http://www.botanicalcollections.be/specimen/BR0000008976314	3	23		2005-09-06	3166								Meise Botanic Garden					Plantae	Tracheophyta	Malpighiales	Rhizophoraceae	Magnoliopsida		ICBN
PRESERVED_SPECIMEN	Castanea mollissima Blume	SPECIES	CN	http://data.rbge.org.uk/herb/E00026748	E00026748	Castanea	mollissima	China	1994	1994-07-26		Kuang-Yuh Wang & Tsui-Ya Liu					E	1994-07-26						http://data.rbge.org.uk/herb/E00026748	7	26		2014-01-24	43						BGBASE:31220	http://biocol.org/urn:lsid:biocol.org:col:15670						Plantae	Tracheophyta	Fagales	Fagaceae	Magnoliopsida	E	ICBN
PRESERVED_SPECIMEN	Casuarina equisetifolia subsp. equisetifolia	SUBSPECIES	ID	http://data.biodiversitydata.nl/naturalis/specimen/L.1535692	L.1535692	Casuarina	equisetifolia	Indonesia	1951	1951-09-25	Insula: Pulau Panaitan (Prinseneiland) W of Tg. Parat.	Borssum Waalkes J van	equisetifolia				L	1951/09/25		Java			ASIA	L.1535692	9	25																Plantae	Tracheophyta	Fagales	Casuarinaceae	Magnoliopsida	Botany	ICN	Plantae|Magnoliopsidae|Fagales|Casuarinaceae
PRESERVED_SPECIMEN	Catabrosa aquatica P.Beauv.	SPECIES	EE	TU260851	TU260851	Catabrosa	aquatica	Estonia	1993	1993-06-24	Vormsi, Hullo-Suuremõisa tee ääres ~1 km Hullost	H. Sarapuu					TU	1993-06-24			H. Sarapuu	1993-06-24T00:00:00.000+0000		TU260851	6	24				habitat: kraavikaldal							Natural History Museum, University of Tartu		4			Plantae	Tracheophyta	Poales	Poaceae	Liliopsida	TU		Viridiplantae; Anthophyta; Monocotyledonae; Poales; Poaceae; Catabrosa
PRESERVED_SPECIMEN	Catenella caespitosa (Withering) L.M.Irvine, 1976	SPECIES	GB	http://data.rbge.org.uk/herb/E00713766	E00713766	Catenella	caespitosa	United Kingdom	1982	1982-08-26	Harrow Harbour						E	1982-08-26		Scotland				http://data.rbge.org.uk/herb/E00713766	8	26	(VC 109) Caithness	2015-07-14							BGBASE:725913	http://biocol.org/urn:lsid:biocol.org:col:15670						Plantae	Rhodophyta	Gigartinales	Caulacanthaceae	Florideophyceae	E	ICBN
PRESERVED_SPECIMEN	Cautleya gracilis var. gracilis	VARIETY	CN	http://data.rbge.org.uk/herb/E00211120	E00211120	Cautleya	gracilis	China	1938	1938-07-28	Kiukiang Valley, Taron, Mt. Chingtinglaka	Yü, Tse-tsun	gracilis				E	1938-07-28		Yunnan Province				http://data.rbge.org.uk/herb/E00211120	7	28	Jiangxi	2013-02-08	19512					2600 M	BGBASE:536749	http://biocol.org/urn:lsid:biocol.org:col:15670						Plantae	Tracheophyta	Zingiberales	Zingiberaceae	Liliopsida	E	ICBN
PRESERVED_SPECIMEN	Celastrus scandens L.	SPECIES	US	http://www.botanicalcollections.be/specimen/BR0000005796816	BR0000005796816	Celastrus	scandens	United States			West POint	Collector unknown					BR	S.D.						http://www.botanicalcollections.be/specimen/BR0000005796816				2011-12-02	S.N.								Meise Botanic Garden					Plantae	Tracheophyta	Celastrales	Celastraceae	Magnoliopsida		ICBN
PRESERVED_SPECIMEN	Celosia cristata L.	SPECIES	EE	TU277401	TU277401	Celosia	cristata	Estonia	1972	1972-10-04	Viljandi.	L. Pihlapuu					TU	1972-10-04			L. Pihlapuu	1972-10-04T00:00:00.000+0000		TU277401	10	4				habitat: Toas. Potilillena.							Natural History Museum, University of Tartu		4			Plantae	Tracheophyta	Caryophyllales	Amaranthaceae	Magnoliopsida	TU		Viridiplantae; Anthophyta; Eudicotyledonae; Caryophyllales; Amaranthaceae; Celosia
PRESERVED_SPECIMEN	Centaurea decipiens Thuill.	SPECIES	NL	http://data.biodiversitydata.nl/naturalis/specimen/L.3426748	L.3426748	Centaurea	decipiens	Netherlands	1912	1912-08-02	in de duinen bezuiden Katwijkzw.	Wijngaarden AJ van					L	1912/08/02					EUROPE	L.3426748	8	2																Plantae	Tracheophyta	Asterales	Asteraceae	Magnoliopsida	Botany	ICN	Plantae|Magnoliopsidae|Asterales|Compositae
PRESERVED_SPECIMEN	Cephalanthera damasonium Druce	SPECIES	GB	b27816d5-0e2a-411a-bea4-1dcff82e8794	BM001003960	Cephalanthera	damasonium	United Kingdom	1960	1960-05-29		Patricia Anne Sims		51.711321	-0.872474	WGS84	BM		NEOTYPE	England			EUROPE	2295129	5	29			624						NHMUK:ecatalogue:2295129							Plantae	Tracheophyta	Asparagales	Orchidaceae	Liliopsida	BOT		Orchidaceae
PRESERVED_SPECIMEN	Cephalanthera longifolia (L.) Fritsch	SPECIES	GB	e4d01e3c-a30b-4fbd-bee3-b9aff0881af7	BM000954657	Cephalanthera	longifolia	United Kingdom	1930	1930-06-08		Patrick Martin Hall		50.90489	-1.411216	WGS84	BM			England			EUROPE	2293072	6	8			560						NHMUK:ecatalogue:2293072							Plantae	Tracheophyta	Asparagales	Orchidaceae	Liliopsida	BOT		Monocotyledones; Orchidaceae
PRESERVED_SPECIMEN	Cephalanthera rubra (L.) Rich.	SPECIES	GB	6ec8f899-e55b-460e-bedb-d1d3e325e653	BM000625315	Cephalanthera	rubra	United Kingdom	1920	1920-08-01		Edward Metcalfe Day		51.879927	-1.944422	WGS84	BM			England			EUROPE	4735952	8			2017-10-13	1542						NHMUK:ecatalogue:4735952							Plantae	Tracheophyta	Asparagales	Orchidaceae	Liliopsida	BOT		Orchidaceae
PRESERVED_SPECIMEN	Cephalotaxus fortunei Hook.	SPECIES	CN	http://data.rbge.org.uk/herb/E00189317	E00189317	Cephalotaxus	fortunei	China	1995	1995-02-13	10km northeast of the county capital Lanping, near the Shanlan_lanping Road "101" sign. Nujiang Prefecture northwest Yunnan province.	Dendrological Atlas Project					E	1995-02-13		Yunnan Province				http://data.rbge.org.uk/herb/E00189317	2	13		2005-03-10	43225B					28-2900 M	BGBASE:201115	http://biocol.org/urn:lsid:biocol.org:col:15670						Plantae	Tracheophyta	Pinales	Cephalotaxaceae	Pinopsida	E	ICBN
PRESERVED_SPECIMEN	Ceramium Roth, 1797	GENUS	GB	http://data.rbge.org.uk/herb/E00713940	E00713940	Ceramium		United Kingdom	1982	1982-08-14	Findhorn	Caldwell, H.L.					E	1982-08-14		Scotland				http://data.rbge.org.uk/herb/E00713940	8	14	(VC 95) Moray	2015-07-14							BGBASE:726786	http://biocol.org/urn:lsid:biocol.org:col:15670						Plantae	Rhodophyta	Ceramiales	Ceramiaceae	Florideophyceae	E	ICBN
PRESERVED_SPECIMEN	Ceramium Roth, 1797	GENUS	GB	http://data.rbge.org.uk/herb/E00713995	E00713995	Ceramium		United Kingdom	1968	1968-07-23	Watchet	Irvine, D.E.G.					E	1968-07-23		England				http://data.rbge.org.uk/herb/E00713995	7	23	(VC 5) South Somerset	2015-03-05							BGBASE:726859	http://biocol.org/urn:lsid:biocol.org:col:15670						Plantae	Rhodophyta	Ceramiales	Ceramiaceae	Florideophyceae	E	ICBN
PRESERVED_SPECIMEN	Ceramium Roth, 1797	GENUS	GB	http://data.rbge.org.uk/herb/E00714013	E00714013	Ceramium		United Kingdom	1975	1975-07-14	[Mainland], Twagcos, Lerwick	Irvine, D.E.G.					E	1975-07-14		Scotland				http://data.rbge.org.uk/herb/E00714013	7	14	(VC 112) Shetland	2015-07-24							BGBASE:726885	http://biocol.org/urn:lsid:biocol.org:col:15670						Plantae	Rhodophyta	Ceramiales	Ceramiaceae	Florideophyceae	E	ICBN
PRESERVED_SPECIMEN	Cerastium pumilum subsp. glutinosum (Fries) Jalas	SUBSPECIES	EE	TU252071	TU252071	Cerastium	pumilum	Estonia	1974	1974-06-12		L. Pihlapuu	glutinosum				TU	1974-06-12			Kaili Orav	2008-08-18T00:00:00.000+0000		TU252071	6	12	Saare maakond			habitat: kadastikus							Natural History Museum, University of Tartu		4			Plantae	Tracheophyta	Caryophyllales	Caryophyllaceae	Magnoliopsida	TU		Viridiplantae; Anthophyta; Eudicotyledonae; Caryophyllales; Caryophyllaceae; Cerastium
PRESERVED_SPECIMEN	Ceratostema nodosum Luteyn	SPECIES	EC	http://data.rbge.org.uk/herb/E00327881	E00327881	Ceratostema	nodosum	Ecuador	1979	1979-01-10	Prov. Napo-Pastaza: Baeza-Tena road. 25-28 kms S of bridge in Cosanga	Luteyn, James L. & Lebrón-Luteyn, Maria					E	1979-01-10	ISOTYPE					http://data.rbge.org.uk/herb/E00327881	1	10		2010-02-22	6745					1460-1375 M	BGBASE:414645	http://biocol.org/urn:lsid:biocol.org:col:15670						Plantae	Tracheophyta	Ericales	Ericaceae	Magnoliopsida	E	ICBN
PRESERVED_SPECIMEN	Ceratostylis selebensis J.J.Sm.	SPECIES	ID	http://data.biodiversitydata.nl/naturalis/specimen/L%20%200043450	L 0043450	Ceratostylis	selebensis	Indonesia	1929	1929-09-10	B. Waroe Meoessa?Selebes	Kjellberg GK					L	1929/09/10	HOLOTYPE	Sulawesi	Smith JJ		ASIA	L 0043450	9	10																Plantae	Tracheophyta	Asparagales	Orchidaceae	Liliopsida	Botany	ICN	Plantae|Magnoliopsidae|Asparagales|Orchidaceae
PRESERVED_SPECIMEN	Ceriops tagal (Perr.) C.B.Rob.	SPECIES	ID	http://data.biodiversitydata.nl/naturalis/specimen/L.2489324	L.2489324	Ceriops	tagal	Indonesia	1992	1992-09-22	Suwung swamp delta.	Gordon D; Bougher A					L	1992/09/22		Lesser Sunda Islands	Hou D	1994-03-01T00:00:00.000+0000	ASIA	L.2489324	9	22																Plantae	Tracheophyta	Malpighiales	Rhizophoraceae	Magnoliopsida	Botany	ICN	Plantae|Magnoliopsidae|Malpighiales|Rhizophoraceae
PRESERVED_SPECIMEN	Cestrum corymbosum Schltdl.	SPECIES	BR	http://specimens.kew.org/herbarium/K000964719	K000964719	Cestrum	corymbosum	Brazil	1933	1933-09-13	Cantareiras.	Hoehne, W.					K				Kuhlmann, M.			K000964719	9	13		2013-11-28	s.n.													Plantae	Tracheophyta	Solanales	Solanaceae	Magnoliopsida	Herbarium		SOLANACEAE
PRESERVED_SPECIMEN	Cetraria iberica A.Crespo & Barreno	species	SP	http://id.luomus.fi/HA.H9504301	HA.H9504301	Cetraria	iberica	SP	1977	1977-05-01/1977-05-31				41.002222	-3.2475	WGS84	H		Isotype	Province of Guadalajara			Europe	http://id.luomus.fi/MY.5318640	5		Tamajón	1530276720		Ad ramos fruticis (Cistus ladaniferus).		1		1050	H9504301	http://tun.fi/HR.85		Hispania. Guadalajara, Tamajón.	GX.22	41.002222 -3.2475 WGS84	A.Crespo & Barreno
PRESERVED_SPECIMEN	Chaerophyllum aromaticum L.	SPECIES	EE	TU261036	TU261036	Chaerophyllum	aromaticum	Estonia	1968	1968-07-26	Võru rajoon, Haanja, Plaani	L. Pihlapuu					TU	1968-07-26			L. Pihlapuu	1968-07-26T00:00:00.000+0000		TU261036	7	26				habitat: metsaserval							Natural History Museum, University of Tartu		4			Plantae	Tracheophyta	Apiales	Apiaceae	Magnoliopsida	TU		Viridiplantae; Anthophyta; Eudicotyledonae; Apiales; Apiaceae; Chaerophyllum
PRESERVED_SPECIMEN	Chamaecrista choriophylla var. latifolia (Benth.) H.S.Irwin & Barneby	VARIETY	BR	http://specimens.kew.org/herbarium/K000839191	K000839191	Chamaecrista	choriophylla	Brazil	1972	1972-05-28	Km 132 ao longo da rodovia Lagoa Santa-Conceição do Mato Dentro-Diamantina.	Semir, J.; Joly, A.M.; Martins, F.	latifolia				K				Barneby, R.C.			K000839191	5	28		2012-10-23	2374		Altura 40cm. Flores amarelas											Plantae	Tracheophyta	Fabales	Fabaceae	Magnoliopsida	Herbarium		LEGUMINOSAE-CAESALPINIOIDEAE
PRESERVED_SPECIMEN	Chamaecrista cotinifolia var. cotinifolia	VARIETY	BR	http://specimens.kew.org/herbarium/K000835886	K000835886	Chamaecrista	cotinifolia	Brazil				Ferreira, A.R.	cotinifolia				K							K000835886				2012-10-18	813													Plantae	Tracheophyta	Fabales	Fabaceae	Magnoliopsida	Herbarium		LEGUMINOSAE-CAESALPINIOIDEAE
PRESERVED_SPECIMEN	Chamaecrista potentilla var. potentilla	VARIETY	BR	http://specimens.kew.org/herbarium/K000839121	K000839121	Chamaecrista	potentilla	Brazil	1970	1970-03-20	ca. 18 km E of Diamantina.	Ramos, J.; Souza, R.; Irwin, H.S.; Santos, R.R.; Fonsêca, S.F.	potentilla				K							K000839121	3	20		2012-10-22	27960	Rocky summits and intervening gallery forest	Seedlings of common shrub in recently burned gallery margin.											Plantae	Tracheophyta	Fabales	Fabaceae	Magnoliopsida	Herbarium		LEGUMINOSAE-CAESALPINIOIDEAE
PRESERVED_SPECIMEN	Chamaecrista ramosa var. lucida (Benth.) H.S.Irwin & Barneby	VARIETY	BR	http://specimens.kew.org/herbarium/K000056711	K000056711	Chamaecrista	ramosa	Brazil	1980	1980-04-29	Chapadão Ocidental da Bahia. 30km N from Correntina on the Inhaúmas road.	Hage, J.L.; Carvalho, A.M.; Bromley, G.L.; Brito, H.S.; Harley, R.M.	lucida	-13.17	-44.62	WGS84	K				Barbosa, A.R.	2013-05-24T00:00:00.000+0000		K000056711	4	29		2014-01-08	21930	Dry cerrado	Spreading wiry shrub to 50 cm. More information given	0.2										Plantae	Tracheophyta	Fabales	Fabaceae	Magnoliopsida	Herbarium		LEGUMINOSAE-CAESALPINIOIDEAE
PRESERVED_SPECIMEN	Cheilanthes coriacea	species	ET	http://id.luomus.fi/H.1074402	H.1074402	Cheilanthes	coriacea	Ethiopia	1840	1840-09-01	Mai Mezano valley near Djeladjeranne	Schimper, G. H. W.					H	01.09.1840					Africa	http://tun.fi/MY.744532	9	1		1492084435							H1074402	http://tun.fi/HR.168	Luomus, University of Eastern Finland		GX.270
PRESERVED_SPECIMEN	Chenopodium berlandieri Moq.	SPECIES	NL	http://data.biodiversitydata.nl/naturalis/specimen/L.3193605	L.3193605	Chenopodium	berlandieri	Netherlands	1956	1956-08-30	Buitendijks, opgespoten terrein van Oostelijk Flevoland bij Harderwijk.	Bakker D					L	1956/08/30					EUROPE	L.3193605	8	30																Plantae	Tracheophyta	Caryophyllales	Amaranthaceae	Magnoliopsida	Botany	ICN	Plantae|Magnoliopsidae|Caryophylllales|Chenopodiaceae
PRESERVED_SPECIMEN	Chenopodium ficifolium Sm.	SPECIES	BE	http://www.botanicalcollections.be/specimen/BR0000011892755	BR0000011892755	Chenopodium	ficifolium	Belgium	1976	1976-09-06	Grembergen, stortplaats	Vanhecke L.					BR							http://www.botanicalcollections.be/specimen/BR0000011892755	9	6		2013-02-11	5084	tussen de ± begraven vuilnis							Meise Botanic Garden					Plantae	Tracheophyta	Caryophyllales	Amaranthaceae	Magnoliopsida		ICBN
PRESERVED_SPECIMEN	Chenopodium vulvaria L.	SPECIES	BE	http://www.botanicalcollections.be/specimen/BR0000011902294	BR0000011902294	Chenopodium	vulvaria	Belgium	1860	1860-06-22	Saint-Servais	Barbier		50.476808	4.834424	WGS84	BR							http://www.botanicalcollections.be/specimen/BR0000011902294	6	22		2013-03-01				5e3					Meise Botanic Garden					Plantae	Tracheophyta	Caryophyllales	Amaranthaceae	Magnoliopsida		ICBN
PRESERVED_SPECIMEN	Chondria littoralis Harv.	SPECIES	US	9ba059f0-a8b4-4264-b172-0ac536fb0afd	BM000619481	Chondria	littoralis	United States	1850	1850-02-01	Nearest Named Place: Key West	William Henry Harvey					BM			Florida			NORTH_AMERICA	4790530	2			2017-10-20	s.n.						NHMUK:ecatalogue:4790530							Plantae	Rhodophyta	Ceramiales	Rhodomelaceae	Florideophyceae	BOT		Rhodomelaceae
PRESERVED_SPECIMEN	Chrysanthemum erubescens Stapf	SPECIES	CN	http://coldb.mnhn.fr/catalognumber/mnhn/p/p00760207	P00760207	Chrysanthemum	erubescens	China	1931	1931-08-28		Licent, E.					P		TYPE					http://coldb.mnhn.fr/catalognumber/mnhn/p/p00760207	8	28		2015-09-03										Shantung				Plantae	Tracheophyta	Asterales	Asteraceae	Magnoliopsida	P
PRESERVED_SPECIMEN	Chrysophyllum flexuosum Mart.	SPECIES	BR	http://www.botanicalcollections.be/specimen/BR0000005417704	BR0000005417704	Chrysophyllum	flexuosum	Brazil	1834	1834-01-01	Corcovado	Luschnath B.					BR		TYPE					http://www.botanicalcollections.be/specimen/BR0000005417704				2011-01-05	42								Meise Botanic Garden					Plantae	Tracheophyta	Ericales	Sapotaceae	Magnoliopsida		ICBN
PRESERVED_SPECIMEN	Cirsium hybridum Koch	SPECIES	BE	http://www.botanicalcollections.be/specimen/BR0000011689348	BR0000011689348	Cirsium	hybridum	Belgium	1868	1868-07-01	Loupoigne	Dandois H.					BR							http://www.botanicalcollections.be/specimen/BR0000011689348	7			2009-01-08									Meise Botanic Garden					Plantae	Tracheophyta	Asterales	Asteraceae	Magnoliopsida		ICBN
PRESERVED_SPECIMEN	Citrullus lanatus (Thunb.) Matsumura & Nakai	SPECIES	BR	http://specimens.kew.org/herbarium/K001139700	K001139700	Citrullus	lanatus	Brazil	1971	1971-05-30	Parque 10, along roadside.	Maas, H.; Maas, P.J.M.					K							K001139700	5	30		2015-09-01	322/B													Plantae	Tracheophyta	Cucurbitales	Cucurbitaceae	Magnoliopsida	Herbarium		CUCURBITACEAE
PRESERVED_SPECIMEN	Cladium mariscus (L.) Pohl	SPECIES	EE	TU253639	TU253639	Cladium	mariscus	Estonia	1978	1978-07-17	Kingissepa rajoon, Viidumäe, Kuusnõmme mk. kv. 293	T. Tuulik					TU	1978-07-17			T. Tuulik	1978-07-17T00:00:00.000+0000		TU253639	7	17				habitat: madalsoo							Natural History Museum, University of Tartu		4			Plantae	Tracheophyta	Poales	Cyperaceae	Liliopsida	TU		Viridiplantae; Anthophyta; Monocotyledonae; Poales; Cyperaceae; Cladium
PRESERVED_SPECIMEN	Cladonia iberica Burgaz & Ahti	species	ES	http://id.luomus.fi/HA.H9503781	HA.H9503781	Cladonia	iberica	ES	1989	1989-12-04		Burgaz, A. R.		40.576389	-4.001944	WGS84	H		Paratype	Community of Madrid	Ahti, Teuvo	1992	Europe	http://id.luomus.fi/MY.5311556	12	4	Galapagar	1530276615		On soil from Junipso oxycedri - Quercetum rotundifoliae woods.		1	atypical, another unknown	800	H9503781	http://tun.fi/HR.85		Spain. Madrid province, Galapagar.	GX.22	40.576389 -4.001944 WGS84	Burgaz & Ahti
PRESERVED_SPECIMEN	Cladonia prancei Ahti	species	BR	http://id.luomus.fi/HA.H9500048	HA.H9500048	Cladonia	prancei	BR	1988	1988-01-01/1988-12-31	Amazonia [Amazonas], basin of Rio Negro. Road margins Camanaus-Uaupés road near Camanaus.	Ramos, J. F. (15944)					H		Isotype		Teuvo Ahti	1988		http://tun.fi/MY.132720				1382504145		Sandy soil, terra firme. Terrestrial on white sand.					H9500048	http://tun.fi/HR.129			GX.22		Ahti
PRESERVED_SPECIMEN	Cladonia schofieldii Ahti & Brodo	species	CA	http://id.luomus.fi/HA.H9504020	HA.H9504020	Cladonia	schofieldii	CA	1980	1980-07-26		Ahti, T.		52.666667	-132.05	WGS84	H		Holotype	British Columbia, Haida Gwaii, Moresby Island	Ahtei, Teuvo; Brodo, Irwin M.	1.1993	Northern America	http://id.luomus.fi/MY.5310211	7	26		1530276593	38989	Timberline grasslands and heaths with scattered Tsuga mertensiana scrub (perhumid upper oroboreal to orohemiarctic zone).	2nd Internat. Congr. System. Evol. Biol. Excursion.	1		800-1000	H9504020	http://tun.fi/HR.85		Queen Charlotte Islands. Moresby Island, Tasu Sound, c. 2,5 km SW of Tasu, N slope of the summit of "Mine Mtn.".	GX.22	52°40' N, 132°03-04' W	Ahti & Brodo
PRESERVED_SPECIMEN	Cladophora glomerata var. glomerata	VARIETY	NL	http://data.biodiversitydata.nl/naturalis/specimen/L.4094873	L.4094873	Cladophora	glomerata	Netherlands	1944	1944-05-22	Nanstsche. ! gvan leiduinen (Amster. waterlei).	Pelsma C	glomerata				L	1944/05/22					EUROPE	L.4094873	5	22																Plantae	Chlorophyta	Cladophorales	Cladophoraceae	Ulvophyceae	Botany	ICN	Plantae|Algae|Chlorophyceae
PRESERVED_SPECIMEN	Clematis hirsuta Guill. & Perr.	SPECIES	SN	http://coldb.mnhn.fr/catalognumber/mnhn/p/p00078507	P00078507	Clematis	hirsuta	Senegal	1899	1899-12-01		Chevalier, A.J.B.					P				Raynal			http://coldb.mnhn.fr/catalognumber/mnhn/p/p00078507	12			2015-09-15										Miayes.				Plantae	Tracheophyta	Ranunculales	Ranunculaceae	Magnoliopsida	P
PRESERVED_SPECIMEN	Clematis nutans var. pseudoconnata Kuntze	VARIETY	NP	76200c42-9bb0-4cec-8c3a-db77a94bcc0e	BM000521577	Clematis	nutans	Nepal	1819	1819-01-01		Nathaniel Wallich	pseudoconnata	28.253008	83.938548	WGS84	BM		HOLOTYPE		Krishna Kumar Shrestha		ASIA	4976959					s.n.						NHMUK:ecatalogue:4976959							Plantae	Tracheophyta	Ranunculales	Ranunculaceae	Magnoliopsida	BOT		Ranunculaceae
PRESERVED_SPECIMEN	Clematis pierotii Miq.	SPECIES	JP	http://data.biodiversitydata.nl/naturalis/specimen/L%20%200325699	L 0325699	Clematis	pierotii	Japan			in itinere ad ...... in I. Nippon legit v.S.Japonia.	Siebold PF von					L		SYNTYPE	Honshu			ASIA	L 0325699																		Plantae	Tracheophyta	Ranunculales	Ranunculaceae	Magnoliopsida	Botany	ICN	Plantae|Magnoliopsidae|Ranunculales|Ranunculaceae
PRESERVED_SPECIMEN	Clematis vitalba L.	SPECIES	BE	http://www.botanicalcollections.be/specimen/BR0000025773989V	BR0000025773989V	Clematis	vitalba	Belgium	1959	1959-08-31	Jette-St-Pierre	Constant Vanden Berghen					BR							http://www.botanicalcollections.be/specimen/BR0000025773989V	8	31		2017-07-31	159								Meise Botanic Garden					Plantae	Tracheophyta	Ranunculales	Ranunculaceae	Magnoliopsida		ICBN
PRESERVED_SPECIMEN	Cleome violacea L.	SPECIES	none	http://coldb.mnhn.fr/catalognumber/mnhn/p/p05418687	P05418687	Cleome	violacea										P							http://coldb.mnhn.fr/catalognumber/mnhn/p/p05418687				2015-09-04														Plantae	Tracheophyta	Brassicales	Cleomaceae	Magnoliopsida	P
PRESERVED_SPECIMEN	Clerodendrum disparifolium Blume	SPECIES	ID	http://data.biodiversitydata.nl/naturalis/specimen/L.2756405	L.2756405	Clerodendrum	disparifolium	Indonesia	1941	1941-11-18	Archipel. Ind.: Java, Buitenzorg, Land Bolang, bij Kp. Boenar (brug over de Tjidoerian) G. Tendjoleat.	Steenis CGGJ van					L	1941/11/18		Java			ASIA	L.2756405	11	18																Plantae	Tracheophyta	Lamiales	Lamiaceae	Magnoliopsida	Botany	ICN	Plantae|Magnoliopsidae|Lamiales|Labiatae
PRESERVED_SPECIMEN	Clerodendrum tomentosum (Vent.) R.Br.	SPECIES	AU	http://www.botanicalcollections.be/specimen/BR0000013495312	BR0000013495312	Clerodendrum	tomentosum	Australia			Melbourn	Müller Fred.					BR	S.D.						http://www.botanicalcollections.be/specimen/BR0000013495312				2014-07-22	S.N.								Meise Botanic Garden					Plantae	Tracheophyta	Lamiales	Lamiaceae	Magnoliopsida		ICBN
PRESERVED_SPECIMEN	Cliostomum griffithii (Sm.) Coppins	SPECIES	GB	http://data.rbge.org.uk/herb/E00423191	E00423191	Cliostomum	griffithii	United Kingdom	2009	2009-09-01	Invertromie Wood	Ellis, Christopher J.					E	2009-09-01		Scotland				http://data.rbge.org.uk/herb/E00423191	9	1	(VC 96) Easterness	2015-10-08	L674						BGBASE:455790	http://biocol.org/urn:lsid:biocol.org:col:15670						Fungi	Ascomycota	Lecanorales	Ramalinaceae	Lecanoromycetes	E	ICBN
PRESERVED_SPECIMEN	Clusia criuva subsp. parviflora Vesque	SUBSPECIES	BR	http://specimens.kew.org/herbarium/K001092810	K001092810	Clusia	criuva	Brazil			Rio Janeiro	Gaziou, A.	parviflora	-22.92	-43.22	WGS84	K				Nascimento, J.E. Jr.			K001092810				2016-01-26	13577			0.2										Plantae	Tracheophyta	Malpighiales	Clusiaceae	Magnoliopsida	Herbarium		CLUSIACEAE; CLUSIACEAE
PRESERVED_SPECIMEN	Clutia richardiana Müll.Arg.	SPECIES	ET	http://www.botanicalcollections.be/specimen/BR0000008252067	BR0000008252067	Clutia	richardiana	Ethiopia	1837	1837-06-07	In declivitate australi montis Scholada	Schimper W.G.					BR		ISOSYNTYPE					http://www.botanicalcollections.be/specimen/BR0000008252067	6	7		2006-05-04	199								Meise Botanic Garden					Plantae	Tracheophyta	Malpighiales	Peraceae	Magnoliopsida		ICBN
PRESERVED_SPECIMEN	Cnemidaria chocoensis Stolze	SPECIES	CO	3d5c3628-13e7-49d0-bc0a-e724affa905b	BM000937599	Cyathea	chocoensis	Colombia	1971	1971-03-26		David Bruce Lellinger, Elías Ramón de la Sota		6.290361	-76.978244	WGS84	BM		HOLOTYPE	Chocó	Robert G. Stolze		SOUTH_AMERICA	483895	3	26		2018-03-12	76						NHMUK:ecatalogue:483895							Plantae	Tracheophyta	Cyatheales	Cyatheaceae	Polypodiopsida	BOT		Cyatheaceae
PRESERVED_SPECIMEN	Coccoloba paraguariensis Lindau	SPECIES	PY	http://coldb.mnhn.fr/catalognumber/mnhn/p/p00734677	P00734677	Coccoloba	paraguariensis	Paraguay	1876	1876-05-01		Balansa, B.					P		ISOTYPE		Brandbyge			http://coldb.mnhn.fr/catalognumber/mnhn/p/p00734677	5			2015-10-22										Berges escarpées du Rio-Paraguay, à l'Assomption				Plantae	Tracheophyta	Caryophyllales	Polygonaceae	Magnoliopsida	P
PRESERVED_SPECIMEN	Coeloglossum viride (L.) Hartm.	SPECIES	GB	92d3f086-bc95-42f6-8d90-610567c4655e	BM001003037	Dactylorhiza	viride	United Kingdom	1930	1930-07-25		Alfred James Wilmott		57.11568	-2.896484	WGS84	BM			Scotland			EUROPE	2294662	7	25			3642	gully west of the waterfall					NHMUK:ecatalogue:2294662							Plantae	Tracheophyta	Asparagales	Orchidaceae	Liliopsida	BOT		Monocotyledones; Orchidaceae
PRESERVED_SPECIMEN	Columnea kienastiana Regel	SPECIES	EC	http://www.botanicalcollections.be/specimen/BR0000008245434	BR0000008245434	Columnea	kienastiana	Ecuador	1977	1977-06-10	Manabi, road to Chone, 15 km W of Santo Domingo	Wiehler					BR		ISOTYPE					http://www.botanicalcollections.be/specimen/BR0000008245434	6	10		2009-09-09	77108								Meise Botanic Garden					Plantae	Tracheophyta	Lamiales	Gesneriaceae	Magnoliopsida		ICBN
PRESERVED_SPECIMEN	Comanthera xeranthemoides (Bong.) L.R.Parra & Giul.	SPECIES	BR	http://specimens.kew.org/herbarium/K000879910	K000879910	Comanthera	xeranthemoides	Brazil	1968	1968-06-01	4km N. of the Base Camp of the Expedition, close to Xavantina-São Felix road.	Ratter, J.A.; Souza, R.; Santos, R.R.		-12.9	-51.87	WGS84	K				Echternacht, L.			K000879910	6	1		2013-03-04	1610	Growing on short grassy campo close to a lake												Plantae	Tracheophyta	Poales	Eriocaulaceae	Liliopsida	Herbarium		ERIOCAULACEAE
PRESERVED_SPECIMEN	Comarum palustre L.	SPECIES	EE	TU369144	TU369144	Comarum	palustre	Estonia	1973	1973-07-04	Põlva rajoon, Kanepi, Jõksi järve	L. Pihlapuu					TU	1973-07-04			L. Pihlapuu	1973-07-04T00:00:00.000+0000		TU369144	7	4				habitat: kaldal							Natural History Museum, University of Tartu		4			Plantae	Tracheophyta	Rosales	Rosaceae	Magnoliopsida	TU		Viridiplantae; Anthophyta; Eudicotyledonae; Rosales; Rosaceae; Comarum
PRESERVED_SPECIMEN	Combretum gracile var. glandulosum Stace	VARIETY	BO	a1584e73-9304-426d-83ae-2842c96e18d6	BM000953729	Combretum	gracile	Bolivia, Plurinational State of	1978	1978-02-10		W.R. Anderson	glandulosum				BM		HOLOTYPE		Clive Anthony Stace		SOUTH_AMERICA	466656	2	10		2018-02-01	12032						NHMUK:ecatalogue:466656							Plantae	Tracheophyta	Myrtales	Combretaceae	Magnoliopsida	BOT		Combretaceae
PRESERVED_SPECIMEN	Cometes surattensis Burm.f.	SPECIES	none	http://coldb.mnhn.fr/catalognumber/mnhn/p/p04939197	P04939197	Cometes	surattensis										P							http://coldb.mnhn.fr/catalognumber/mnhn/p/p04939197				2017-12-13														Plantae	Tracheophyta	Caryophyllales	Caryophyllaceae	Magnoliopsida	P
PRESERVED_SPECIMEN	Commelina benghalensis L.	SPECIES	ID	http://data.biodiversitydata.nl/naturalis/specimen/WAG.1444550	WAG.1444550	Commelina	benghalensis	Indonesia			Boschdistrikt Krawang.	Boschproefstation					L						ASIA	WAG.1444550																		Plantae	Tracheophyta	Commelinales	Commelinaceae	Liliopsida	Botany	ICN	Plantae|Magnoliopsidae|Commelinales|Commelinaceae
PRESERVED_SPECIMEN	Connarus paniculatus Roxb.	SPECIES	none	http://coldb.mnhn.fr/catalognumber/mnhn/p/p05615497	P05615497	Connarus	paniculatus										P							http://coldb.mnhn.fr/catalognumber/mnhn/p/p05615497				2015-09-05														Plantae	Tracheophyta	Oxalidales	Connaraceae	Magnoliopsida	P
PRESERVED_SPECIMEN	Convolvulus aschersonii Engl.	SPECIES	ZW	f4017dcc-99d5-40bf-b84c-f2d40a144db2	BM001035803	Convolvulus	aschersonii	Zimbabwe	1927	1927-06-29		Ralph George Norwood Young					BM		HOLOTYPE		John Richard Ironside Wood		AFRICA	5590774	6	29		2018-02-01	18497						NHMUK:ecatalogue:5590774							Plantae	Tracheophyta	Solanales	Convolvulaceae	Magnoliopsida	BOT		Convolvulaceae
PRESERVED_SPECIMEN	Convolvulus glomeratus Choisy	SPECIES	SA	http://data.rbge.org.uk/herb/E00507154	E00507154	Convolvulus	glomeratus	Saudi Arabia	1836	1836-01-29	In deserti planitie prope Dscheddam	Schimper, W.P.H.					E	1836-01-29	ISOLECTOTYPE					http://data.rbge.org.uk/herb/E00507154	1	29		2011-10-14	784						BGBASE:516878	http://biocol.org/urn:lsid:biocol.org:col:15670						Plantae	Tracheophyta	Solanales	Convolvulaceae	Magnoliopsida	E	ICBN
PRESERVED_SPECIMEN	Copaifera L.	GENUS	BR	http://specimens.kew.org/herbarium/K000834504	K000834504	Copaifera		Brazil	1996	1996-07-17	Passagem Funda, na estrada Mucugê-Cascavel, passando pelas fazendas.	Hind, N.; Harley, R.; Smith, S.; Bautista, H.P.		-13.1	-41.43	WGS84	K							K000834504	7	17		2012-09-10	3719	Carrasco. Vegetação predominantemente arbustiva, entrelaçada com espécies da caatinga como licuri, braúna e icó-preto, e espécies de cerrado	Árvore: até 8m, copa ampla. Folíolos cartáceos, verde-oliva. Frutos imaturos avermelhados e maduros castanhos											Plantae	Tracheophyta	Fabales	Fabaceae	Magnoliopsida	Herbarium		LEGUMINOSAE-CAESALPINIOIDEAE
PRESERVED_SPECIMEN	Cordiera sessilis Kuntze	SPECIES	BR	http://specimens.kew.org/herbarium/K001135546	K001135546	Cordiera	sessilis	Brazil	1964	1964-09-25	c. 2 km S of Xavantina.	Irwin, H.S.					K							K001135546	9	25		2015-07-31	6316													Plantae	Tracheophyta	Gentianales	Rubiaceae	Magnoliopsida	Herbarium		RUBIACEAE
PRESERVED_SPECIMEN	Corydalis DC.	GENUS	CN	http://data.rbge.org.uk/herb/E00209175	E00209175	Corydalis		China	1938	1938-07-09		Ludlow, Sherriff, & Taylor					E	1938-07-09						http://data.rbge.org.uk/herb/E00209175	7	9		2010-04-26	5195						BGBASE:220649	http://biocol.org/urn:lsid:biocol.org:col:15670						Plantae	Tracheophyta	Ranunculales	Papaveraceae	Magnoliopsida	E	ICBN
PRESERVED_SPECIMEN	Corydalis duclouxii H.Lév. & Vaniot	SPECIES	CN	http://data.rbge.org.uk/herb/E00209241	E00209241	Corydalis	duclouxii	China	1914	1914-03-10		Handel-Mazzetti, H.					E	1914-03-10						http://data.rbge.org.uk/herb/E00209241	3	10		2005-10-28	506						BGBASE:220583	http://biocol.org/urn:lsid:biocol.org:col:15670						Plantae	Tracheophyta	Ranunculales	Papaveraceae	Magnoliopsida	E	ICBN
PRESERVED_SPECIMEN	Corydalis duclouxii H.Lév. & Vaniot	SPECIES	CN	http://data.rbge.org.uk/herb/E00209246	E00209246	Corydalis	duclouxii	China				Cavalerie, J.					E							http://data.rbge.org.uk/herb/E00209246				2005-10-28	8089						BGBASE:220578	http://biocol.org/urn:lsid:biocol.org:col:15670						Plantae	Tracheophyta	Ranunculales	Papaveraceae	Magnoliopsida	E	ICBN
PRESERVED_SPECIMEN	Corydalis flaccida Hook.f. & Thomson	SPECIES	CN	http://data.rbge.org.uk/herb/E00209332	E00209332	Corydalis	flaccida	China	1938	1938-08-25		Yü, T.T.					E	1938-08-25						http://data.rbge.org.uk/herb/E00209332	8	25		2005-10-28	22471						BGBASE:220449	http://biocol.org/urn:lsid:biocol.org:col:15670						Plantae	Tracheophyta	Ranunculales	Papaveraceae	Magnoliopsida	E	ICBN
PRESERVED_SPECIMEN	Corydalis laelia Prain	SPECIES	BT	25d3ca93-f0cc-476a-9962-f7577c319f28	BM000551636	Corydalis	laelia	Bhutan	1971	1971-05-21		S Bowes Lyon					BM		HOLOTYPE		D.G. Long		ASIA	4978383	5	21			6050						NHMUK:ecatalogue:4978383							Plantae	Tracheophyta	Ranunculales	Papaveraceae	Magnoliopsida	BOT		Angiosperm; Papaveraceae
PRESERVED_SPECIMEN	Corydalis smithiana Fedde	SPECIES	CN	http://data.rbge.org.uk/herb/E00015443	E00015443	Corydalis	smithiana	China	1987			B & L					E	September 1987						http://data.rbge.org.uk/herb/E00015443				2012-05-15	12228						BGBASE:22788	http://biocol.org/urn:lsid:biocol.org:col:15670						Plantae	Tracheophyta	Ranunculales	Papaveraceae	Magnoliopsida	E	ICBN
PRESERVED_SPECIMEN	Corydalis tianzhuensis M.S.Yan & Ching J.Wang	SPECIES	CN	http://data.rbge.org.uk/herb/E00015458	E00015458	Corydalis	tianzhuensis	China	1917			Forrest, George					E	June 1917						http://data.rbge.org.uk/herb/E00015458				2014-02-28	14025						BGBASE:22808	http://biocol.org/urn:lsid:biocol.org:col:15670						Plantae	Tracheophyta	Ranunculales	Papaveraceae	Magnoliopsida	E	ICBN
PRESERVED_SPECIMEN	Cota coelopoda (Boiss.) Boiss.	SPECIES	IR	http://data.rbge.org.uk/herb/E00413597	E00413597	Cota	coelopoda	Iran, Islamic Republic of	1976	1976-05-30	Persia: C: Damghan-Semnan: 14-26 km NW Fulad Mahalla	Iranshahr		36.083333	53.833333	WGS84	E	1976-05-30	ISOTYPE	Semnan				http://data.rbge.org.uk/herb/E00413597	5	30		2010-12-16	52356					1800 M	BGBASE:448367	http://biocol.org/urn:lsid:biocol.org:col:15670						Plantae	Tracheophyta	Asterales	Asteraceae	Magnoliopsida	E	ICBN
PRESERVED_SPECIMEN	Cotoneaster antoninae Juz.	species	RU	http://id.luomus.fi/HA.H0381680	HA.H0381680	Cotoneaster	antoninae	RU	1995	1995-01-01/1995-12-31	[Karelia ladogensis], Sortavala, Rauskun rinne. [Slope of Mound Rausku].	Cantell. S.					H		Isolectotype		Bertil Hylmö	1995		http://tun.fi/MY.100292				1382503552							H0381680	http://tun.fi/HR.129	Luomus		GX.22		Juz.
PRESERVED_SPECIMEN	Cotoneaster niger (Wahlb.) Fr.	SPECIES	EE	TU253716	TU253716	Cotoneaster	niger	Estonia	1953	1953-08-01	Kagu-Eesti, Orava, Kahkva	L. Pihlapuu					TU	1953-08-01			L. Pihlapuu	1953-08-01T00:00:00.000+0000		TU253716	8	1				habitat: kooliaias ilupõõsana			Etiketil: Cotoneaster niger (Thunb.) Fr.				Natural History Museum, University of Tartu		4			Plantae	Tracheophyta	Rosales	Rosaceae	Magnoliopsida	TU		Viridiplantae; Anthophyta; Eudicotyledonae; Rosales; Rosaceae; Cotoneaster
PRESERVED_SPECIMEN	Coussarea contracta (Walpert) Müll.Arg.	SPECIES	BR	http://coldb.mnhn.fr/catalognumber/mnhn/p/p03913897	P03913897	Coussarea	contracta	Brazil	1967	1967-12-20		Lourteig, A.					P			Santa Catarina				http://coldb.mnhn.fr/catalognumber/mnhn/p/p03913897	12	20		2017-05-19										Isla Santa Catarina, Saco Grande.				Plantae	Tracheophyta	Gentianales	Rubiaceae	Magnoliopsida	P
PRESERVED_SPECIMEN	Cremanthodium calcicola W.W.Sm.	SPECIES	CN	http://data.rbge.org.uk/herb/E00020889	E00020889	Cremanthodium	calcicola	China	1930	1930-01-01		Forrest, George					E	1930						http://data.rbge.org.uk/herb/E00020889				2001-11-01	28802						BGBASE:25677	http://biocol.org/urn:lsid:biocol.org:col:15670						Plantae	Tracheophyta	Asterales	Asteraceae	Magnoliopsida	E	ICBN
PRESERVED_SPECIMEN	Crotalaria brevidens var. dorumaensis (R.Wilczek) Polhill	VARIETY	CD	http://www.botanicalcollections.be/specimen/BR0000008932464	BR0000008932464	Crotalaria	brevidens	Congo, Democratic Republic of the	1933	1933-09-21	Doruma	De Graer A.M.	dorumaensis	4.716667	27.683333	WGS84	BR		HOLOTYPE					http://www.botanicalcollections.be/specimen/BR0000008932464	9	21		2012-10-09	326	Brousse							Meise Botanic Garden					Plantae	Tracheophyta	Fabales	Fabaceae	Magnoliopsida		ICBN
PRESERVED_SPECIMEN	Croton rosmarinoides Millsp.	SPECIES	CU	http://coldb.mnhn.fr/catalognumber/mnhn/p/p00634667	P00634667	Croton	rosmarinoides	Cuba	1860	1860-01-01		Wright, C.					P							http://coldb.mnhn.fr/catalognumber/mnhn/p/p00634667				2017-04-20														Plantae	Tracheophyta	Malpighiales	Euphorbiaceae	Magnoliopsida	P
PRESERVED_SPECIMEN	Cruciata mixta Ehrend. & Schönb.-Tem.	SPECIES	TR	http://specimens.kew.org/herbarium/K000772682	K000772682	Cruciata	mixta	Turkey	1957	1957-04-19	Prov. Adana Distr. Bahce (N. Amanus), Dumanli Dag near Haruniye	Davis, A.P.; Hedge, I.C.					K		ISOTYPE					K000772682	4	19		2011-12-06	26883	Ostrya scrub on N. slope	Perennial											Plantae	Tracheophyta	Gentianales	Rubiaceae	Magnoliopsida	Herbarium		RUBIACEAE
PRESERVED_SPECIMEN	Crypsinus crenatopinnatus (C.B.Cl.) Copel.	SPECIES	CN	http://data.rbge.org.uk/herb/E00417662	E00417662	Pichisermollodes	crenatopinnatus	China	1905		Payso-Payanmg [?]	Esquirol, Joseph Henri (Rev. Père)					E	July 1905						http://data.rbge.org.uk/herb/E00417662				2011-02-17	487						BGBASE:454291	http://biocol.org/urn:lsid:biocol.org:col:15670						Plantae	Tracheophyta	Polypodiales	Polypodiaceae	Polypodiopsida	E	ICBN
PRESERVED_SPECIMEN	Cryptocarya impressa Miq.	SPECIES	ID	http://data.biodiversitydata.nl/naturalis/specimen/L.1785984	L.1785984	Cryptocarya	impressa	Indonesia	1953	1953-12-05	N.E.Borneo, island Nunukan (northern part)	Kostermans AJGH					L	1953/12/05		Borneo	Kostermans AJGH		ASIA	L.1785984	12	5																Plantae	Tracheophyta	Laurales	Lauraceae	Magnoliopsida	Botany	ICN	Plantae|Magnoliopsidae|Laurales|Lauraceae
PRESERVED_SPECIMEN	Ctenanthe ericae L.Andersson	SPECIES	CO	http://coldb.mnhn.fr/catalognumber/mnhn/p/p00689977	P00689977	Ctenanthe	ericae	Colombia	1974	1974-01-16		Gasche, J.|Desplats, J.					P		ISOTYPE		Andersson			http://coldb.mnhn.fr/catalognumber/mnhn/p/p00689977	1	16		2017-04-21										Amazonas, rio Iagara-Parana, La Chorrera, territoire des indiens Witoto Jitomagaro, famille Kuiru (17 km en aval de La Chorrera)				Plantae	Tracheophyta	Zingiberales	Marantaceae	Liliopsida	P
PRESERVED_SPECIMEN	Ctenitis propinqua (J.Sm. ex Presl) Copel.	SPECIES	PH	http://coldb.mnhn.fr/catalognumber/mnhn/p/p01410187	P01410187	Ctenitis	propinqua	Philippines				Cuming, H.					P							http://coldb.mnhn.fr/catalognumber/mnhn/p/p01410187				2016-07-15										Luzon				Plantae	Tracheophyta	Polypodiales	Dryopteridaceae	Polypodiopsida	P
PRESERVED_SPECIMEN	Cubeba officinalis Rafin.	SPECIES	ID	http://data.biodiversitydata.nl/naturalis/specimen/U.1477603	U.1477603	Piper	officinalis	Indonesia			Java.	Zollinger (leg) H					L						ASIA	U.1477603																		Plantae	Tracheophyta	Piperales	Piperaceae	Magnoliopsida	Botany	ICN	Plantae|Magnoliopsidae|Piperales|Piperaceae
PRESERVED_SPECIMEN	Cuphea brachiata Mart. ex Koehne	SPECIES	BR	http://specimens.kew.org/herbarium/K000533059	K000533059	Cuphea	brachiata	Brazil			near Piassabassú, banks of the Rio [Rio St. Francisco]	Gardner					K							K000533059				2007-12-28	1286	very common in dry open sandy places	A diffuse fruticose plant about 1 1/2 feet high											Plantae	Tracheophyta	Myrtales	Lythraceae	Magnoliopsida	Herbarium		LYTHRACEAE
PRESERVED_SPECIMEN	Cuphea glutinosa Cham. & Schltdl.	SPECIES	US	http://www.botanicalcollections.be/specimen/BR0000005851737	BR0000005851737	Cuphea	glutinosa	United States			S.L.	Collector unknown					BR	S.D.						http://www.botanicalcollections.be/specimen/BR0000005851737				2012-05-24	S.N.								Meise Botanic Garden					Plantae	Tracheophyta	Myrtales	Lythraceae	Magnoliopsida		ICBN
PRESERVED_SPECIMEN	Cuphea viscosissima Jacq.	SPECIES	US	http://www.botanicalcollections.be/specimen/BR0000013050016	BR0000013050016	Cuphea	viscosissima	United States			bei Harrisburg in Pensylvanien am ... Susquehanas	Wied M.					BR	S.D.						http://www.botanicalcollections.be/specimen/BR0000013050016				2012-05-31	S.N.								Meise Botanic Garden					Plantae	Tracheophyta	Myrtales	Lythraceae	Magnoliopsida		ICBN
PRESERVED_SPECIMEN	Cupressus funebris Endl.	SPECIES	CN	http://data.rbge.org.uk/herb/E00762441	E00762441	Cupressus	funebris	China			At Tali, Lichiang etc Yunnan	Kingdon-Ward, F.					E			Yunnan Province				http://data.rbge.org.uk/herb/E00762441				2016-03-26	226						BGBASE:787832	http://biocol.org/urn:lsid:biocol.org:col:15670						Plantae	Tracheophyta	Pinales	Cupressaceae	Pinopsida	E	ICBN
PRESERVED_SPECIMEN	Curtia verticillaris Knobl.	SPECIES	BR	http://specimens.kew.org/herbarium/K001048710	K001048710	Curtia	verticillaris	Brazil	1992	1992-08-27	Serra da Tromba, próximo à ponte caída do Rio de Contas.	Ganev, W.					K							K001048710	8	27		2015-07-03	969													Plantae	Tracheophyta	Gentianales	Gentianaceae	Magnoliopsida	Herbarium		GENTIANACEAE
PRESERVED_SPECIMEN	Curtisia dentata (Burm.f.) C.A.Sm.	SPECIES	none	http://coldb.mnhn.fr/catalognumber/mnhn/p/p04560687	P04560687	Curtisia	dentata										P							http://coldb.mnhn.fr/catalognumber/mnhn/p/p04560687				2015-09-04														Plantae	Tracheophyta	Cornales	Curtisiaceae	Magnoliopsida	P
PRESERVED_SPECIMEN	Cuscuta atrans Feinbrun	SPECIES	GR	http://data.rbge.org.uk/herb/E00016304	E00016304	Cuscuta	atrans	Greece	1950	1950-08-04	White Mountains, Srowiditi	Davis, Peter Hadland					E	1950-08-04	ISOTYPE	Crete				http://data.rbge.org.uk/herb/E00016304	8	4		2011-02-02	18132					2100 M	BGBASE:23769	http://biocol.org/urn:lsid:biocol.org:col:15670						Plantae	Tracheophyta	Solanales	Convolvulaceae	Magnoliopsida	E	ICBN
PRESERVED_SPECIMEN	Cuscuta epithymum (L.) L.	SPECIES	EE	TU258749	TU258749	Cuscuta	epithymum	Estonia	1953	1953-06-25		Põldmaa					TU	1953-06-25			L. Viljasoo	1964-01-01T00:00:00.000+0000		TU258749	6	25				habitat: ristiku põllul					125		Natural History Museum, University of Tartu		4			Plantae	Tracheophyta	Solanales	Convolvulaceae	Magnoliopsida	TU		Viridiplantae; Anthophyta; Eudicotyledonae; Solanales; Cuscutaceae; Cuscuta
PRESERVED_SPECIMEN	Cuscuta epithymum (L.) L.	SPECIES	GB	http://specimens.kew.org/herbarium/K000790215	K000790215	Cuscuta	epithymum	United Kingdom	1930	1930-08-07	No Man's Land.	Marsden-Jones, E.M.					K							K000790215	8	7		2012-03-28	s.n.													Plantae	Tracheophyta	Solanales	Convolvulaceae	Magnoliopsida	Herbarium		CONVOLVULACEAE
PRESERVED_SPECIMEN	Cuscuta epithymum (L.) L.	SPECIES	GB	http://specimens.kew.org/herbarium/K000790247	K000790247	Cuscuta	epithymum	United Kingdom	1902	1902-08-06	Label has 'Kent' - no Shirley Hill in Kent?	Lowne, B.T.		51.36	-0.06	WGS84	K							K000790247	8	6		2012-03-28	s.n.													Plantae	Tracheophyta	Solanales	Convolvulaceae	Magnoliopsida	Herbarium		CONVOLVULACEAE
PRESERVED_SPECIMEN	Cuscuta epithymum (L.) L.	SPECIES	NL	http://data.biodiversitydata.nl/naturalis/specimen/L.3359151	L.3359151	Cuscuta	epithymum	Netherlands			Deelensche heide (b. Arnhem).	Soest JL van					L	1925/08/31 | 1925/08/01					EUROPE	L.3359151																		Plantae	Tracheophyta	Solanales	Convolvulaceae	Magnoliopsida	Botany	ICN	Plantae|Magnoliopsidae|Solanales|Convolvulaceae
PRESERVED_SPECIMEN	Cuscuta epithymum Murray	SPECIES	GB	http://data.rbge.org.uk/herb/E00432481	E00432481	Cuscuta	epithymum	United Kingdom	1844	1844-01-01	Epping	Babington, Charles C.					E	1844		England				http://data.rbge.org.uk/herb/E00432481			(VC 19) North Essex	2013-11-27							BGBASE:457797	http://biocol.org/urn:lsid:biocol.org:col:15670						Plantae	Tracheophyta	Solanales	Convolvulaceae	Magnoliopsida	E	ICBN
PRESERVED_SPECIMEN	Cyanotis ciliata (Blume) Bakh.f.	SPECIES	ID	http://data.biodiversitydata.nl/naturalis/specimen/L.1441519	L.1441519	Belosynapsis	ciliata	Indonesia	1936	1936-06-06	Bij Bocaz.	Lütjeharms WJ					L	1936/06/06		Sumatra			ASIA	L.1441519	6	6																Plantae	Tracheophyta	Commelinales	Commelinaceae	Liliopsida	Botany	ICN	Plantae|Magnoliopsidae|Commelinales|Commelinaceae
PRESERVED_SPECIMEN	Cyathea borbonica Desv.	SPECIES	none	http://coldb.mnhn.fr/catalognumber/mnhn/p/p01560947	P01560947	Alsophila	borbonica										P				Janssen			http://coldb.mnhn.fr/catalognumber/mnhn/p/p01560947				2015-09-03														Plantae	Tracheophyta	Cyatheales	Cyatheaceae	Polypodiopsida	P
PRESERVED_SPECIMEN	Cyathea horrida Sm.	SPECIES	JM	http://data.rbge.org.uk/herb/E00414415	E00414415	Cyathea	horrida	Jamaica	1874	1874-01-01		Jenman, George Samuel					E	1874	TYPE					http://data.rbge.org.uk/herb/E00414415				2011-02-21							BGBASE:454552	http://biocol.org/urn:lsid:biocol.org:col:15670						Plantae	Tracheophyta	Cyatheales	Cyatheaceae	Polypodiopsida	E	ICBN
PRESERVED_SPECIMEN	Cyclachaena xanthiifolia Fresen.	SPECIES	EE	TU277034	TU277034	Cyclachaena	xanthiifolia	Estonia	1958	1958-08-10	Pärnu, Rääma rabas prügipaigal hulgi.	A. Remmel					TU	1958-08-10			A. Remmel	1958-08-10T00:00:00.000+0000		TU277034	8	10											Natural History Museum, University of Tartu		4			Plantae	Tracheophyta	Asterales	Asteraceae	Magnoliopsida	TU		Viridiplantae; Anthophyta; Eudicotyledonae; Asterales; Asteraceae; Iva
PRESERVED_SPECIMEN	Cynanchum stauntonii (Decne.) Schltr. ex H.Lév.	SPECIES	CN	http://data.rbge.org.uk/herb/E00016420	E00016420	Vincetoxicum	stauntonii	China	1917	1917-06-23	Kweitschou orient.: Inter urbes Kutschou et Liping in vivo inter Luduan et Liping hic illic gregarie, ad medium subinersa. Substr. marneo.	Handel-Mazzetti, Heinrich					E	1917-06-23		Guizhou Province				http://data.rbge.org.uk/herb/E00016420	6	23		2009-01-08	10.964					600-650 M	BGBASE:24126	http://biocol.org/urn:lsid:biocol.org:col:15670						Plantae	Tracheophyta	Gentianales	Apocynaceae	Magnoliopsida	E	ICBN
PRESERVED_SPECIMEN	Cynoglossum creticum Mill.	SPECIES	FR	http://coldb.mnhn.fr/catalognumber/mnhn/p/p00616847	P00616847	Cynoglossum	creticum	France				Monard					P			83 Var				http://coldb.mnhn.fr/catalognumber/mnhn/p/p00616847				2015-09-04										Salins d'Hyères				Plantae	Tracheophyta	Boraginales	Boraginaceae	Magnoliopsida	P
PRESERVED_SPECIMEN	Cynosurus cristatus L.	SPECIES	EE	TU261130	TU261130	Cynosurus	cristatus	Estonia	1971	1971-06-27	Põlva rajoon, Taevaskoja, Ahja jõe luht, Valgesoo veski tammi juures	Lea Voosalu					TU	1971-06-27			Lea Voosalu	1971-06-27T00:00:00.000+0000		TU261130	6	27				habitat: jõeluht							Natural History Museum, University of Tartu		4			Plantae	Tracheophyta	Poales	Poaceae	Liliopsida	TU		Viridiplantae; Anthophyta; Monocotyledonae; Poales; Poaceae; Cynosurus
PRESERVED_SPECIMEN	Cynosurus cristatus L.	SPECIES	EE	TU261179	TU261179	Cynosurus	cristatus	Estonia	1977	1977-06-23	Võru rajoon, Sulbi k., Kärgula kool, Osula teed 1300 m	H. Varend					TU	1977-06-23			H. Varend	1977-06-23T00:00:00.000+0000		TU261179	6	23				habitat: niidul					31		Natural History Museum, University of Tartu		4			Plantae	Tracheophyta	Poales	Poaceae	Liliopsida	TU		Viridiplantae; Anthophyta; Monocotyledonae; Poales; Poaceae; Cynosurus
PRESERVED_SPECIMEN	Cynosurus cristatus L.	SPECIES	EE	TU261184	TU261184	Cynosurus	cristatus	Estonia	1972	1972-07-08	Võru rajoon, Obinitsa, Tuhkvitsa oja vasak	K. Kresla					TU	1972-07-08			K. Kresla	1972-07-08T00:00:00.000+0000		TU261184	7	8				habitat: kallas					23		Natural History Museum, University of Tartu		4			Plantae	Tracheophyta	Poales	Poaceae	Liliopsida	TU		Viridiplantae; Anthophyta; Monocotyledonae; Poales; Poaceae; Cynosurus
PRESERVED_SPECIMEN	Cyperus elatus L.	SPECIES	ID	http://data.biodiversitydata.nl/naturalis/specimen/L.1374725	L.1374725	Cyperus	elatus	Indonesia	1951	1951-04-28	Java, Djakarta, Muara Ankeh.	Kern JH					L	1951/04/28		Java	Kern JH		ASIA	L.1374725	4	28																Plantae	Tracheophyta	Poales	Cyperaceae	Liliopsida	Botany	ICN	Plantae|Magnoliopsidae|Poales|Cyperaceae
PRESERVED_SPECIMEN	Cyperus ephemerus Kukkonen & Väre	SPECIES	IR	http://www.botanicalcollections.be/specimen/BR0000006595586	BR0000006595586	Cyperus	ephemerus	Iran, Islamic Republic of	1972	1972-05-15	Est du Dasht-e-Lut, à l'est des grandes dunes	Léonard J.		30.916667	59.65	WGS84	BR		ISOTYPE					http://www.botanicalcollections.be/specimen/BR0000006595586	5	15		2008-09-22	6192								Meise Botanic Garden					Plantae	Tracheophyta	Poales	Cyperaceae	Liliopsida		ICBN
PRESERVED_SPECIMEN	Cyrtandra djamuensis (Schltr.)	SPECIES	PG	http://data.rbge.org.uk/herb/E00062704	E00062704	Cyrtandropsis	djamuensis	Papua New Guinea	1908	1908-04-17	Kaiser-Wilhelmsland, su den Waldem am Djamu	Schlechter, Friedrich Richard Rudolf					E	1908-04-17	ISOTYPE					http://data.rbge.org.uk/herb/E00062704	4	17		2011-01-31	14561					300 M	BGBASE:124950	http://biocol.org/urn:lsid:biocol.org:col:15670						Plantae	Tracheophyta	Lamiales	Gesneriaceae	Magnoliopsida	E	ICBN
PRESERVED_SPECIMEN	Cyrtandra lacerata B.L.Burtt	SPECIES	MY	http://data.rbge.org.uk/herb/E00062569	E00062569	Cyrtandra	lacerata	Malaysia	1977	1977-11-16	Fourth division: Gunong Mulu National Park; Park boundary near Sungai Lansat	Argent, George C.G.		4.016667	114.816667	WGS84	E	1977-11-16	HOLOTYPE	Sarawak				http://data.rbge.org.uk/herb/E00062569	11	16		2010-09-23	763						BGBASE:114313	http://biocol.org/urn:lsid:biocol.org:col:15670						Plantae	Tracheophyta	Lamiales	Gesneriaceae	Magnoliopsida	E	ICBN
PRESERVED_SPECIMEN	Cyrtandra thamnodes B.L.Burtt	SPECIES	MY	http://data.rbge.org.uk/herb/E00062538	E00062538	Cyrtandra	thamnodes	Malaysia	1962	1962-05-22	First Division: Bukit Kapor	Burtt, Brian L. & Woods, Patrick J. B.					E	1962-05-22	HOLOTYPE	Sarawak				http://data.rbge.org.uk/herb/E00062538	5	22	Bau [1st Division]	2015-10-07	B.1885						BGBASE:112842	http://biocol.org/urn:lsid:biocol.org:col:15670						Plantae	Tracheophyta	Lamiales	Gesneriaceae	Magnoliopsida	E	ICBN
PRESERVED_SPECIMEN	Cyrtomium devexiscapulae	species	CN	http://id.luomus.fi/EIG.1513	EIG.1513	Cyrtomium	devexiscapulae	China	1996	1996-04-27	Anjishan	Ce-ming, Tan					H	27.04.1996		Jiangxi			Asia	http://tun.fi/MY.697780	4	27	Longnan	1492083597	9604189						H1725235	http://tun.fi/HR.168	Luomus, University of Eastern Finland	Jiangxi Prov. Longnan Co. Anjishan alt.400m, under forest in valley	GX.2951
PRESERVED_SPECIMEN	Cyrtomium falcatum	species	CN	http://id.luomus.fi/EIG.1524	EIG.1524	Cyrtomium	falcatum	China	1941	1941-07-08	Kowloon; Lung Ha Wan	Taam, Y. W.					H	08.07.1941		Hong Kong			Asia	http://tun.fi/MY.698143	7	8		1492083606	2202						H1123913	http://tun.fi/HR.168	Luomus, University of Eastern Finland	Kowloon: Lungha Wan 2 ft. high	GX.270
PRESERVED_SPECIMEN	Cyrtomium fortunei	species	CN	http://id.luomus.fi/EIG.1561	EIG.1561	Cyrtomium	fortunei	China	1996	1996-11-29	Wuningyan	Tan, Ce-ming					H	29.11.1996		Jiangxi			Asia	http://tun.fi/MY.699367	11	29	Wuning	1492083632	9611152						H1726108	http://tun.fi/HR.168	Luomus, University of Eastern Finland	Jiangxi Prov. Wuning Co. in valley alt.450m	GX.231
PRESERVED_SPECIMEN	Cystophora racemosa (Harv. ex Kütz.) J.Agardh	SPECIES	AU	e0bff9e5-d8eb-4a94-8254-15eeee667b40	BM000804813	Cystophora	racemosa	Australia				E Lemprieu					BM			Western Australia			OCEANIA	4526090					s.n.						NHMUK:ecatalogue:4526090							Chromista	Ochrophyta	Fucales	Sargassaceae	Phaeophyceae	BOT		Cystophoraceae
PRESERVED_SPECIMEN	Cystopteris bulbifera	species	US	http://id.luomus.fi/EIG.5460	EIG.5460	Cystopteris	bulbifera	United States	1878	1878-05-17	Bluffs	Eggert, H.					H	17.05.1878		Illinois			North America	http://tun.fi/MY.720504	5	17	Scott	1492084068							H1126455	http://tun.fi/HR.168	Luomus, University of Eastern Finland	Bluffs in Illinois	GX.270
PRESERVED_SPECIMEN	Cystopteris fragilis subsp. fragilis	Ssp	US	http://id.luomus.fi/EIG.5686	EIG.5686	Cystopteris	fragilis	United States	1898	1898-06-15		Chase, Virginius H.	fragilis				H	15.06.1898		Illinois			North America	http://tun.fi/MY.721248	6	15	Stark	1492084083							H1126665	http://tun.fi/HR.168	Luomus, University of Eastern Finland	Wooded hillside 4 mi. N.W. of Wady Petra	GX.231
PRESERVED_SPECIMEN	Cystopteris fragilis (L.) Bernh.	SPECIES	EE	TU261362	TU261362	Cystopteris	fragilis	Estonia	1935	1935-06-19	Ambla khk. Jäneda " Mõisamäel", Jäneda	Jul. Lunts					TU	1935-06-19			Jul. Lunts	1935-06-19T00:00:00.000+0000		TU261362	6	19	Järvamaa			habitat: vallseljakul							Natural History Museum, University of Tartu		4			Plantae	Tracheophyta	Polypodiales	Cystopteridaceae	Polypodiopsida	TU		Viridiplantae; Monilophyta; Pteridopsida; Woodsiaceae; Cystopteris
PRESERVED_SPECIMEN	Cystoseira baccata (S.G.Gmel.) P.C.Silva	SPECIES	GB	http://data.rbge.org.uk/herb/E00652940	E00652940	Cystoseira	baccata	United Kingdom	1969	1969-04-14	Guernsey, Vazon Bay	Irvine, D.E.G.					E	1969-04-14		Channel Islands				http://data.rbge.org.uk/herb/E00652940	4	14	(VC 113)	2017-01-11							BGBASE:674861	http://biocol.org/urn:lsid:biocol.org:col:15670						Chromista	Ochrophyta	Fucales	Sargassaceae	Phaeophyceae	E	ICBN
PRESERVED_SPECIMEN	Cystoseira foeniculacea (L.) Grev.	SPECIES	GB	http://data.rbge.org.uk/herb/E00652972	E00652972	Cystoseira	foeniculacea	United Kingdom	1879	1879-01-01	Devon	E.H.Boning					E	1879		England				http://data.rbge.org.uk/herb/E00652972			(VC 3) South Devon	2013-11-28							BGBASE:674917	http://biocol.org/urn:lsid:biocol.org:col:15670						Chromista	Ochrophyta	Fucales	Sargassaceae	Phaeophyceae	E	ICBN
PRESERVED_SPECIMEN	Cystoseira tamariscifolia (Huds.) Papenf.	SPECIES	GB	http://data.rbge.org.uk/herb/E00659505	E00659505	Cystoseira	tamariscifolia	United Kingdom	1969	1969-08-02	Lundy, Hells Gate	Irvine, D.E.G.					E	1969-08-02		England				http://data.rbge.org.uk/herb/E00659505	8	2	(VC 4) North Devon	2015-07-17	243						BGBASE:675025	http://biocol.org/urn:lsid:biocol.org:col:15670						Chromista	Ochrophyta	Fucales	Sargassaceae	Phaeophyceae	E	ICBN
PRESERVED_SPECIMEN	Dacrycarpus imbricatus var. imbricatus	VARIETY	ID	http://data.biodiversitydata.nl/naturalis/specimen/L.1188986	L.1188986	Dacrycarpus	imbricatus	Indonesia	1989	1989-03-11	WEST SUMATRA: S of Gunung(Mt.) Sago, en route from Kampung Puncak Pato to the summit, Batu Sangkar Kabupaten Tanah Datar.	Nagamasu H	imbricatus	-0.35	100.666667	WGS84	L	1989/03/11		Sumatra			ASIA	L.1188986	3	11																Plantae	Tracheophyta	Pinales	Podocarpaceae	Pinopsida	Botany	ICN	Plantae|Pinopsida|Pinales|Podocarpaceae
PRESERVED_SPECIMEN	Dactylorhiza fuchsii (Druce) Soó	SPECIES	EE	TU253963	TU253963	Dactylorhiza	fuchsii	Estonia	1966	1966-06-29	G. (=Gorodenko?) ja Boroni (=Poruni) jõe vahel	P. Pärn					TU	1966-06-29			Kaili Orav	2009-03-31T00:00:00.000+0000		TU253963	6	29				habitat: siirdesoo					58		Natural History Museum, University of Tartu		4			Plantae	Tracheophyta	Asparagales	Orchidaceae	Liliopsida	TU		Viridiplantae; Anthophyta; Monocotyledonae; Asparagales; Orchidaceae; Dactylorhiza
PRESERVED_SPECIMEN	Dactylorhiza incarnata (L.) Soó	SPECIES	EE	TU253908	TU253908	Dactylorhiza	incarnata	Estonia	1928	1928-06-25	Tartu, Tähtvere mõis, Emajõe luht	A. Vohli					TU	1928-06-25			Kaili Orav	2008-12-09T00:00:00.000+0000		TU253908	6	25				habitat: luht, turvas, märg, tasane, päikese paistel, Carex liigid sol. (=üksik)							Natural History Museum, University of Tartu		4			Plantae	Tracheophyta	Asparagales	Orchidaceae	Liliopsida	TU		Viridiplantae; Anthophyta; Monocotyledonae; Asparagales; Orchidaceae; Dactylorhiza
PRESERVED_SPECIMEN	Dactylorhiza maculata (L.) Soó	SPECIES	EE	TU253982	TU253982	Dactylorhiza	maculata	Estonia	1974	1974-07-10	Viljandi rajoon, Tipu koolimaja juures	Ü. Kool					TU	1974-07-10			Kaili Orav	2008-12-11T00:00:00.000+0000		TU253982	7	10				habitat: metsas kohati							Natural History Museum, University of Tartu		4			Plantae	Tracheophyta	Asparagales	Orchidaceae	Liliopsida	TU		Viridiplantae; Anthophyta; Monocotyledonae; Asparagales; Orchidaceae; Dactylorhiza
PRESERVED_SPECIMEN	Dactylorhiza viridis var. viridis	VARIETY	GB	http://data.rbge.org.uk/herb/E00317162	E00317162	Dactylorhiza	viridis	United Kingdom	1811	1811-01-01	near Staindrop.	Backhouse	viridis				E	1811		England				http://data.rbge.org.uk/herb/E00317162			(VC 66) Durham	2015-05-07							BGBASE:320754	http://biocol.org/urn:lsid:biocol.org:col:15670						Plantae	Tracheophyta	Asparagales	Orchidaceae	Liliopsida	E	ICBN
PRESERVED_SPECIMEN	Dahlia dissecta S.Watson	SPECIES	MX	http://coldb.mnhn.fr/catalognumber/mnhn/p/p02140487	P02140487	Dahlia	dissecta	Mexico	1890	1890-07-01		Pringle, C.G.					P		ISOTYPE					http://coldb.mnhn.fr/catalognumber/mnhn/p/p02140487	7			2015-10-08										San Luis Potosi : limestone ledges, San Jose Pass				Plantae	Tracheophyta	Asterales	Asteraceae	Magnoliopsida	P
PRESERVED_SPECIMEN	Danthonia intermedia Vasey	SPECIES	US	http://www.botanicalcollections.be/specimen/BR0000025778199V	BR0000025778199V	Danthonia	intermedia	United States				Kneucker Johann Andreas					BR							http://www.botanicalcollections.be/specimen/BR0000025778199V				2017-03-24	691								Meise Botanic Garden					Plantae	Tracheophyta	Poales	Poaceae	Liliopsida		ICBN
PRESERVED_SPECIMEN	Darwinia citriodora Benth.	SPECIES	AU	http://www.botanicalcollections.be/specimen/BR0000013088668	BR0000013088668	Darwinia	citriodora	Australia			[source of Swan Riv.]	Preiss J.A.					BR	[JUL &!"ç]						http://www.botanicalcollections.be/specimen/BR0000013088668				2014-12-15	2014								Meise Botanic Garden					Plantae	Tracheophyta	Myrtales	Myrtaceae	Magnoliopsida		ICBN
PRESERVED_SPECIMEN	Darwinia diosmoides (DC.) Benth.	SPECIES	AU	http://www.botanicalcollections.be/specimen/BR0000013088675	BR0000013088675	Darwinia	diosmoides	Australia			K.G.S. [Kind Goerge Sound]	Oldfield A.					BR	S.D.						http://www.botanicalcollections.be/specimen/BR0000013088675				2014-12-15	S.N.								Meise Botanic Garden					Plantae	Tracheophyta	Myrtales	Myrtaceae	Magnoliopsida		ICBN
PRESERVED_SPECIMEN	Daucus carota L.	SPECIES	BE	http://www.botanicalcollections.be/specimen/BR0000012449644	BR0000012449644	Daucus	carota	Belgium	1987	1987-06-30	Wilrijk	De Block P.					BR							http://www.botanicalcollections.be/specimen/BR0000012449644	6	30		2007-05-14	46	langs de weg							Meise Botanic Garden					Plantae	Tracheophyta	Apiales	Apiaceae	Magnoliopsida		ICBN
PRESERVED_SPECIMEN	Davallia Sm.	GENUS	ID	http://data.biodiversitydata.nl/naturalis/specimen/L.3727830	L.3727830	Davallia		Indonesia	2008	2008-03-02	Flora of Sulawesi, Sulawesi Lore Lindu National Park, Mt. Nokilalaki.	Cicuzza D		-1.256581	120.162917	WGS84	L	2008/03/02					ASIA	L.3727830	3	2																Plantae	Tracheophyta	Polypodiales	Davalliaceae	Polypodiopsida	Botany	ICN	Plantae|Pteropsida|Polypodiales|Davalliaceae
PRESERVED_SPECIMEN	Davilla nitida (Vahl) Kubitzki	SPECIES	BR	http://specimens.kew.org/herbarium/K001071525	K001071525	Davilla	nitida	Brazil	1942	1942-09-22	7k no. of Instituto Agronomico do Norte, near Eunâ.	Barbosa da Silva, M.					K				Fraga, C.N. de	2010-03-10T00:00:00.000+0000		K001071525	9	22		2014-11-18	94	Data not transcribed	Data not transcribed											Plantae	Tracheophyta	Dilleniales	Dilleniaceae	Magnoliopsida	Herbarium		DILLENIACEAE
PRESERVED_SPECIMEN	Declieuxia fruticosa (Willd. ex Roem. & Schult.) Kuntze	SPECIES	BR	http://specimens.kew.org/herbarium/K001203450	K001203450	Declieuxia	fruticosa	Brazil				Gardner					K							K001203450				2015-11-19	3777													Plantae	Tracheophyta	Gentianales	Rubiaceae	Magnoliopsida	Herbarium		RUBIACEAE
PRESERVED_SPECIMEN	Declieuxia fruticosa (Willd. ex Roem. & Schult.) Kuntze	SPECIES	BR	http://specimens.kew.org/herbarium/K001203456	K001203456	Declieuxia	fruticosa	Brazil	1966	1966-04-04	Rio da Prata, ca. 6 km S. of Posse.	Irwin, H.S.					K							K001203456	4	4		2015-11-19	14334													Plantae	Tracheophyta	Gentianales	Rubiaceae	Magnoliopsida	Herbarium		RUBIACEAE
PRESERVED_SPECIMEN	Deguelia rariflora (Benth.) A.M.G.Azevedo	SPECIES	BR	http://specimens.kew.org/herbarium/K000921336	K000921336	Deguelia	rariflora	Brazil			Borba, Rio Madeira.	Ducke, A.					K				Silva, M.J.	2004-06-06T00:00:00.000+0000		K000921336				2013-06-06	s.n.													Plantae	Tracheophyta	Fabales	Fabaceae	Magnoliopsida	Herbarium		LEGUMINOSAE-PAPILIONOIDEAE
PRESERVED_SPECIMEN	Dendrobium Sw.	GENUS	ID	http://data.biodiversitydata.nl/naturalis/specimen/L.1499291	L.1499291	Dendrobium		Indonesia	1972	1972-08-05	Gunung Leuser Nature Reserve, Atjeh, North Sumatra. Gunung Ketambe and vicinity, 8-15 km SW from the mouth of Lau Ketambe, c.40km NW of Kutatjane, Camp 3-4.	Wilde WJJO de; Wilde-Duyfjes BEE de					L	1972/08/05		Sumatra			ASIA	L.1499291	8	5																Plantae	Tracheophyta	Asparagales	Orchidaceae	Liliopsida	Botany	ICN	Plantae|Magnoliopsidae|Asparagales|Orchidaceae
PRESERVED_SPECIMEN	Dennstaedtia punctilobula	species	US	http://id.luomus.fi/H.1034530	H.1034530	Dennstaedtia	punctilobula	United States	1972	1972-08-07	Horse Mountain, Hatfield	Ahles, H. E.					H	07.08.1972		Massachusetts			North America	http://tun.fi/MY.743158	8	7	Hampshire County	1492084405	75807						H1034530	http://tun.fi/HR.168	Luomus, University of Eastern Finland	Horse Mt.	GX.270
PRESERVED_SPECIMEN	Deparia acrostichoides	species	US	http://id.luomus.fi/EIG.3703	EIG.3703	Deparia	acrostichoides	United States	1892	1892-01-01/1892-12-31		Cheney, L. S.					H	1892		Wisconsin			North America	http://tun.fi/MY.714699				1492083932							H1127374	http://tun.fi/HR.168	Luomus, University of Eastern Finland		GX.231
PRESERVED_SPECIMEN	Deparia boryana	species	ET	http://id.luomus.fi/EIG.3642	EIG.3642	Deparia	boryana	Ethiopia		1980-02-08/1989-02-08	Shedda, 40 km southeast of Bonga.	Smeds, H.					H	08.02.198[?]					Africa	http://tun.fi/MY.714498	2	8		1492083928	661						H1480572	http://tun.fi/HR.168		ETHIOPIA. Kaffa: Shedda, 40 km SE of Bonga. Alt. 2 400 m.	GX.270
PRESERVED_SPECIMEN	Deparia confluens	species	ID	http://id.luomus.fi/EIG.3644	EIG.3644	Deparia	confluens	Indonesia	1910	1910-01-01/1910-01-31	Tengger; Wonosari	Mousset, J. P.					H	01.1910		East Java			Asia	http://tun.fi/MY.714504	1			1492083928							H1591217	http://tun.fi/HR.168	Luomus, University of Eastern Finland	Herbarium javanicum. Wonosari, an Flüssen im Tengger 1200 m	GX.270
PRESERVED_SPECIMEN	Desmodium barbatum (L.) Benth.	SPECIES	BR	http://specimens.kew.org/herbarium/K000931492	K000931492	Desmodium	barbatum	Brazil			Prov. Maranham.	Gardner, G.					K							K000931492				2013-07-03	6001	Informação não transcrita	Informação não transcrita											Plantae	Tracheophyta	Fabales	Fabaceae	Magnoliopsida	Herbarium		LEGUMINOSAE-PAPILIONOIDEAE
PRESERVED_SPECIMEN	Dianthus deltoides L.	SPECIES	EE	TU304580	TU304580	Dianthus	deltoides	Estonia	1972	1972-06-25	Abruka saar	M. Köster					TU	1972-06-25			M. Köster	1972-06-25T00:00:00.000+0000		TU304580	6	25				habitat: metsas, kv. 193-196 sihil							Natural History Museum, University of Tartu		4			Plantae	Tracheophyta	Caryophyllales	Caryophyllaceae	Magnoliopsida	TU		Viridiplantae; Anthophyta; Eudicotyledonae; Caryophyllales; Caryophyllaceae; Dianthus
PRESERVED_SPECIMEN	Diascia appendiculata K.E.Steiner	SPECIES	ZA	http://data.rbge.org.uk/herb/E00026850	E00026850	Diascia	appendiculata	South Africa	1989	1989-09-09	Clanwilliam. Farm Modderfontein, Grey's Pass, 4.2km N of turnoff to Paleisheuwel	Steiner, Kim E					E	1989-09-09	ISOTYPE	Cape				http://data.rbge.org.uk/herb/E00026850	9	9		2008-07-29	1978					260 M	BGBASE:31610	http://biocol.org/urn:lsid:biocol.org:col:15670						Plantae	Tracheophyta	Lamiales	Scrophulariaceae	Magnoliopsida	E	ICBN
PRESERVED_SPECIMEN	Dichapetalum whitei Torre	SPECIES	ZM	f4c3e8b1-6492-4b91-a722-575a6814f4fb	BM000799936	Dichapetalum	whitei	Zambia	1952	1952-09-25	Nearest Named Place: Northern Rhodesia	F White					BM		HOLOTYPE				AFRICA	4517119	9	25		2017-08-21	3364						NHMUK:ecatalogue:4517119							Plantae	Tracheophyta	Malpighiales	Dichapetalaceae	Magnoliopsida	BOT		Dichapetalaceae
PRESERVED_SPECIMEN	Dichondra microcalyx (Hallier f.) Fabris	SPECIES	NZ	http://www.botanicalcollections.be/specimen/BR0000005941803	BR0000005941803	Dichondra	microcalyx	New Zealand			S.L.	Hooker J.D.					BR	S.D.						http://www.botanicalcollections.be/specimen/BR0000005941803				2012-09-17	S.N.								Meise Botanic Garden					Plantae	Tracheophyta	Solanales	Convolvulaceae	Magnoliopsida		ICBN
PRESERVED_SPECIMEN	Dichondra repens J.R.Forst. & G.Forst.	SPECIES	AU	http://www.botanicalcollections.be/specimen/BR0000021455698	BR0000021455698	Dichondra	repens	Australia			S.L.	Collector unknown					BR	S.D.						http://www.botanicalcollections.be/specimen/BR0000021455698				2016-08-25	7771								Meise Botanic Garden					Plantae	Tracheophyta	Solanales	Convolvulaceae	Magnoliopsida		ICBN
PRESERVED_SPECIMEN	Dichroa febrifuga Lour.	SPECIES	ID	http://data.biodiversitydata.nl/naturalis/specimen/L.1849538	L.1849538	Hydrangea	febrifuga	Indonesia	1917	1917-05-24	Archipel. Ind. Sumatra N.W. helling Talamau. *.	Bünnemeijer HAB					L	1917/05/24					ASIA	L.1849538	5	24																Plantae	Tracheophyta	Cornales	Hydrangeaceae	Magnoliopsida	Botany	ICN	Plantae|Magnoliopsidae|Cornales|Hydrangeaceae
PRESERVED_SPECIMEN	Dichrocephala integrifolia subsp. integrifolia	SUBSPECIES	ID	http://data.biodiversitydata.nl/naturalis/specimen/L.3680761	L.3680761	Dichrocephala	integrifolia	Indonesia			Central-Celebes, Koelawi, Grusmark.	Kaudern W	integrifolia				L	1918/11/30 | 1918/11/01		Sulawesi			ASIA	L.3680761																		Plantae	Tracheophyta	Asterales	Asteraceae	Magnoliopsida	Botany	ICN	Plantae|Magnoliopsidae|Asterales|Compositae
PRESERVED_SPECIMEN	Dicliptera chinensis Juss.	SPECIES	CN	http://data.rbge.org.uk/herb/E00702463	E00702463	Dicliptera	chinensis	China									E							http://data.rbge.org.uk/herb/E00702463				2015-05-21							BGBASE:745529	http://biocol.org/urn:lsid:biocol.org:col:15670						Plantae	Tracheophyta	Lamiales	Acanthaceae	Magnoliopsida	E	ICBN
PRESERVED_SPECIMEN	Dicoma argyrophylla Oliv.	SPECIES	ZA	http://coldb.mnhn.fr/catalognumber/mnhn/p/p0010997	P0010997	Macledium	argyrophylla	South Africa	1936	1936-05-01		Marriott, W.E.|Munro, H.K.					P							http://coldb.mnhn.fr/catalognumber/mnhn/p/p0010997	5			2015-09-04										Pietermaritzburg, Natal				Plantae	Tracheophyta	Asterales	Asteraceae	Magnoliopsida	P
PRESERVED_SPECIMEN	Dicranopteris flexuosa	species	BR	http://id.luomus.fi/H.1067251	H.1067251	Dicranopteris	flexuosa	Brazil	1830	1830-01-01/1830-12-31		Roellinger					H	1830[?]		Rio de Janeiro			Central America, South America and the Antarctic	http://tun.fi/MY.744349				1492084432							H1067251	http://tun.fi/HR.168	Luomus, University of Eastern Finland		GX.270
PRESERVED_SPECIMEN	Dictyosphaeria sericea Harvey	SPECIES	AU	79dd29da-ba99-4036-b5c4-c6cb6de377a3	BM000637970	Dictyosphaeria	sericea	Australia				William Henry Harvey					BM			Western Australia			OCEANIA	4859406					563A						NHMUK:ecatalogue:4859406							Plantae	Chlorophyta	Siphonocladales	Siphonocladaceae	Ulvophyceae	BOT		Siphonocladaceae
PRESERVED_SPECIMEN	Dictyota kunthii (C.Agardh) Grev.	SPECIES	NZ	cef0f7d7-bfc1-45b9-834b-fe43cd3f15a9	BM001099759	Dictyota	kunthii	New Zealand	1850	1850-03-01		Anon.					BM						OCEANIA	4335443	3			2018-02-01	s.n.						NHMUK:ecatalogue:4335443							Chromista	Ochrophyta	Dictyotales	Dictyotaceae	Phaeophyceae	BOT		Phaeophyceae; Dictyotales; Dictyotaceae
PRESERVED_SPECIMEN	Didymochlaena truncatula	species	ET	http://id.luomus.fi/EIG.1608	EIG.1608	Didymochlaena	truncatula	Ethiopia	1965	1965-08-17	Buba, about 20 km northwest of Bonga.						H	17.08.1965					Africa	http://tun.fi/MY.700909	8	17	Keffa	1492083664	7782						H1092015	http://tun.fi/HR.168	Luomus, University of Eastern Finland	Buba, about 20 km NW. of Bonga. Alt. ±1800 m.	GX.270
PRESERVED_SPECIMEN	Digitaria ekmanii Hitchc.	SPECIES	CU	http://data.biodiversitydata.nl/naturalis/specimen/L%20%200044156	L 0044156	Digitaria	ekmanii	Cuba	1922	1922-06-26	Prov. Pinar del Rio, Herradura.	Ekman EL					L	1922/06/26	ISOTYPE	Pinar del Rio			SOUTH_AMERICA	L 0044156	6	26																Plantae	Tracheophyta	Poales	Poaceae	Liliopsida	Botany	ICN	Plantae|Magnoliopsidae|Poales|Gramineae
PRESERVED_SPECIMEN	Digitaria linearis Crép.	SPECIES	EE	TU301213	TU301213	Digitaria	linearis	Estonia	1937	1937-08-12	Võrumaa	L. Enari					TU	1937-08-12			L. Enari	1937-08-12T00:00:00.000+0000		TU301213	8	12				habitat: ratasteel männimetsas Piusa raudteejaamast läänes (1-1,5 km)							Natural History Museum, University of Tartu		4			Plantae	Tracheophyta	Poales	Poaceae	Liliopsida	TU		Viridiplantae; Anthophyta; Monocotyledonae; Poales; Poaceae; Digitaria
PRESERVED_SPECIMEN	Digitaria radicosa Miq.	SPECIES	ID	http://data.biodiversitydata.nl/naturalis/specimen/L.1245206	L.1245206	Digitaria	radicosa	Indonesia	1928	1928-05-19	Island N.Sumatra. Serdang, bei pantei-tjermin, verschiedenes sonniges öd - und Weideland.	Lörzing JA					L	1928/05/19		Sumatra			ASIA	L.1245206	5	19																Plantae	Tracheophyta	Poales	Poaceae	Liliopsida	Botany	ICN	Plantae|Magnoliopsidae|Poales|Gramineae
PRESERVED_SPECIMEN	Digitaria rigida Stent	SPECIES	ZZ	http://data.biodiversitydata.nl/naturalis/specimen/L%20%200044240	L 0044240	Digitaria	rigida	unknown or invalid			Nortern ?Iol.Magalakuin R. Grown and flowered at the prinshof Experiment Station, Pretoria. Specimens collected from plot 420 17/1/34.Prinshof no.114.	Pole-Evans IB					L	1929/10/31 | 1929/10/01	TYPE		Henrard JT			L 0044240																		Plantae	Tracheophyta	Poales	Poaceae	Liliopsida	Botany	ICN	Plantae|Magnoliopsidae|Poales|Gramineae
PRESERVED_SPECIMEN	Digitaria setigera Roth	SPECIES	ID	http://data.biodiversitydata.nl/naturalis/specimen/L.1246493	L.1246493	Digitaria	setigera	Indonesia	1957	1957-10-14	Afd. Veeteelt, Kaimana.	Leeuwen A van					L	1957/10/14		New Guinea			ASIA	L.1246493	10	14																Plantae	Tracheophyta	Poales	Poaceae	Liliopsida	Botany	ICN	Plantae|Magnoliopsidae|Poales|Gramineae
PRESERVED_SPECIMEN	Dillwynia teucrioides Sieber ex DC.	species	AU	http://id.luomus.fi/HA.H1520365	HA.H1520365	Dillwynia	teucrioides	AU	1985	1985-01-01/1985-12-31	New South Wales: Botany Bay - Blue Mountains.	Sieber, F. W.					H		OriginalMaterial		J. Nurmi	1985		http://tun.fi/MY.108058				1382503653							H1520365	http://tun.fi/HR.129	Luomus		GX.22		Sieber ex DC.
PRESERVED_SPECIMEN	Dilsea carnosa (Schmidel) Kuntze	SPECIES	GB	http://data.rbge.org.uk/herb/E00718160	E00718160	Dilsea	carnosa	United Kingdom	1952	1952-07-04	[Mainland], Eshaness	Irvine, D.E.G.					E	1952-07-04		Scotland				http://data.rbge.org.uk/herb/E00718160	7	4	(VC 112) Shetland	2015-07-24	A177						BGBASE:730201	http://biocol.org/urn:lsid:biocol.org:col:15670						Plantae	Rhodophyta	Gigartinales	Dumontiaceae	Florideophyceae	E	ICBN
PRESERVED_SPECIMEN	Dinochloa hirsuta S.Dransf.	SPECIES	ID	http://specimens.kew.org/herbarium/K000290665	K000290665	Dinochloa	hirsuta	Indonesia	1984	1984-04-10	South Celebes, Wae Atue, Manurung 7km from Malili	Ramlanto					K		HOLOTYPE		Dransfield, S.	1993-08-20T00:00:00.000+0000		K000290665	4	10		2013-03-19	136	secondary forest	common, climbing on the tree											Plantae	Tracheophyta	Poales	Poaceae	Liliopsida	Herbarium		POACEAE
PRESERVED_SPECIMEN	Diodella teres (Walter) Small	SPECIES	VE	http://specimens.kew.org/herbarium/K000470252	K000470252	Hexasepalum	teres	Venezuela, Bolivarian Republic of	1964	1964-09-04	Merida 14 km. from Barinas along road to Guanare	unknown					K		ISOTYPE					K000470252	9	4		2012-09-19	4204	savannah	Herb, woody at base, up to 50 cm tall. Leaves dull, pale green. Corolla pale lilac. Abundant.											Plantae	Tracheophyta	Gentianales	Rubiaceae	Magnoliopsida	Herbarium		RUBIACEAE
PRESERVED_SPECIMEN	Dioscorea alata L.	SPECIES	GB	http://specimens.kew.org/herbarium/K001145702	K001145702	Dioscorea	alata	United Kingdom	1916	1916-08-31	Cult in Hort. Bot. Reg. Kew. 202-15. Gold Coast.	s.coll					K							K001145702	8	31		2015-11-03	10													Plantae	Tracheophyta	Dioscoreales	Dioscoreaceae	Liliopsida	Herbarium		DIOSCOREACEAE
PRESERVED_SPECIMEN	Dioscorea anguina Roxb.	SPECIES	ID	http://data.biodiversitydata.nl/naturalis/specimen/U.1290951	U.1290951	Dioscorea	anguina	Indonesia	1896	1896-05-25	Insula Java, Madison, Ngebel.	Koorders SH					L	1896/05/25					ASIA	U.1290951	5	25																Plantae	Tracheophyta	Dioscoreales	Dioscoreaceae	Liliopsida	Botany	ICN	Plantae|Magnoliopsidae|Dioscoreales|Dioscoreaceae
PRESERVED_SPECIMEN	Dioscorea cinnamomifolia Hook.	SPECIES	BR	http://specimens.kew.org/herbarium/K001149552	K001149552	Dioscorea	cinnamomifolia	Brazil			Morro de Flamengo. Rio de Janeiro.	Miers, J.					K							K001149552				2015-11-03	3030													Plantae	Tracheophyta	Dioscoreales	Dioscoreaceae	Liliopsida	Herbarium		DIOSCOREACEAE
PRESERVED_SPECIMEN	Dioscorea L.	GENUS	BR	http://specimens.kew.org/herbarium/K001274731	K001274731	Dioscorea		Brazil				Zappi et al					K	2011						K001274731				2017-08-07	3074													Plantae	Tracheophyta	Dioscoreales	Dioscoreaceae	Liliopsida	Herbarium		DIOSCOREACEAE
PRESERVED_SPECIMEN	Dioscorea minima Robins. & Seaton	SPECIES	MX	http://specimens.kew.org/herbarium/K000099015	K000099015	Dioscorea	minima	Mexico	1892	1892-07-28	State of Michoacan, Lava beds near Patzcuaro.	Pringle, C.G.					K		HOLOTYPE					K000099015	7	28		2009-05-14	4157													Plantae	Tracheophyta	Dioscoreales	Dioscoreaceae	Liliopsida	Herbarium		DIOSCOREACEAE
PRESERVED_SPECIMEN	Diospyros abyssinica subsp. attenuata F.White	SUBSPECIES	ZW	http://www.botanicalcollections.be/specimen/BR0000008900470	BR0000008900470	Diospyros	abyssinica	Zimbabwe	1982	1982-01-25	Bunga Forest, Vumba, Lemtali	Malaisse F.	attenuata				BR		HOLOTYPE					http://www.botanicalcollections.be/specimen/BR0000008900470	1	25		2011-01-31	12206								Meise Botanic Garden					Plantae	Tracheophyta	Ericales	Ebenaceae	Magnoliopsida		ICBN
PRESERVED_SPECIMEN	Diplazium australe	species	AU	http://id.luomus.fi/EIG.2748	EIG.2748	Diplazium	australe	Australia			East of Cann River town; Mount Drummer; Head of Soda Greek						H			Victoria			Australia and Oceania	http://tun.fi/MY.711567				1492083860							H1280994	http://tun.fi/HR.168	Luomus, University of Eastern Finland	Australia, Victoria, Head of Soda Greck, Mt. Drummer, E of Cam River.	GX.231
PRESERVED_SPECIMEN	Diplazium cordifolium	species	ID	http://id.luomus.fi/EIG.2709	EIG.2709	Diplazium	cordifolium	Indonesia									H			Java			Asia	http://tun.fi/MY.711438				1492083857							H1127396	http://tun.fi/HR.168	Luomus, University of Eastern Finland		GX.2951
PRESERVED_SPECIMEN	Diplazium dameriae	species	ID	http://id.luomus.fi/EIG.2721	EIG.2721	Diplazium	dameriae	Indonesia	1910	1910-02-01/1910-02-28		Mousset, J. P.					H	02.1910		Java			Asia	http://tun.fi/MY.711480	2			1492083858							H1591259	http://tun.fi/HR.168	Luomus, University of Eastern Finland	Herbarium javanicum. Fundort: Pogal, Höhe: 750 m	GX.2951
PRESERVED_SPECIMEN	Diplazium dilatatum	species	AU	http://id.luomus.fi/EIG.2770	EIG.2770	Diplazium	dilatatum	Australia	1981	1981-09-10	Wooroonooran National Park west of Babinda; The Boulders.	Kukkonen, Ilkka					H	10.09.1981		Queensland			Australia and Oceania	http://tun.fi/MY.711642	9	10		1492083861	10879						H1459257	http://tun.fi/HR.168	Luomus, University of Eastern Finland	AUSTRALIA, Queensland, Bellenden Ker National Park W. of Babinda. The Boulders.	GX.270
PRESERVED_SPECIMEN	Diplazium dilatatum	species	CN	http://id.luomus.fi/EIG.2751	EIG.2751	Diplazium	dilatatum	China	1968	1968-05-15	Chi-ton to chi-ti	Kao, M. T.					H	15.05.1968					Asia	http://tun.fi/MY.711579	5	15	Nantou	1492083860							H1012991	http://tun.fi/HR.168	Luomus, University of Eastern Finland	FLORA OF TAIWAN. LOC.: Chi-ton to chi-ti, Nantou Co.	GX.231
PRESERVED_SPECIMEN	Diplazium donianum	species	CN	http://id.luomus.fi/EIG.2840	EIG.2840	Diplazium	donianum	China	1982	1982-10-13	Wulai						H	13.10.1982		Taiwan			Asia	http://tun.fi/MY.711873	10	13	New Taipei City	1492083866	6044						H1559634	http://tun.fi/HR.168	Luomus, University of Eastern Finland	Taipei County; Wu Lai, 20 km S. of Taipei. Alt. 450 m.	GX.2951
PRESERVED_SPECIMEN	Diplazium esculentum	species	ID	http://id.luomus.fi/EIG.2871	EIG.2871	Diplazium	esculentum	Indonesia	1910	1910-03-01/1910-03-31		Mousset, J. P.					H	03.1910		Java			Asia	http://tun.fi/MY.711975	3		Wonosari	1492083868							H1591176	http://tun.fi/HR.168	Luomus, University of Eastern Finland	Herbarium javanicum. Wonosari, 1150 m.	GX.2951
PRESERVED_SPECIMEN	Diplazium javanicum	species	ID	http://id.luomus.fi/EIG.3012	EIG.3012	Diplazium	javanicum	Indonesia	1893	1893-04-20	Mount Gede	Möller, Hjalmar					H	20.04.1893		Java			Asia	http://tun.fi/MY.712431	4	20	West Java	1492083879							H1127470	http://tun.fi/HR.168	Luomus, University of Eastern Finland	PLANTAE JAVANICAE. Gedé c. 1600 m.	GX.2951
PRESERVED_SPECIMEN	Diplazium maonense	species	CN	http://id.luomus.fi/EIG.3022	EIG.3022	Diplazium	maonense	China	2001	2001-05-17	Xizhi district, Hsinshanmenghu	Her-long, Chiang				Dms	H	17.05.2001		Taiwan			Asia	http://tun.fi/MY.712464	5	17	New Taipei City	1492083880							H1720416	http://tun.fi/HR.168	Luomus, University of Eastern Finland	Taipei County, Hsinshanmenghu, Altitude: 200-300m	GX.2951	25° 07' 40'' N, 121° 38' 11'' E (degrees, minutes, seconds)
PRESERVED_SPECIMEN	Diplazium polypodioides	species	ID	http://id.luomus.fi/EIG.3214	EIG.3214	Diplazium	polypodioides	Indonesia	1910	1910-01-01/1910-01-31		Moussel, J. P.					H	01.1910		Java			Asia	http://tun.fi/MY.713100	1			1492083895							H1591145	http://tun.fi/HR.168	Luomus, University of Eastern Finland		GX.2951
PRESERVED_SPECIMEN	Diplazium polypodioides	species	ID	http://id.luomus.fi/EIG.3216	EIG.3216	Diplazium	polypodioides	Indonesia	1893	1893-04-01/1893-04-30	Mount Gede	Möller, Hjalmar					H	04.1893		Java			Asia	http://tun.fi/MY.713106	4		West Java	1492083895							H1127417	http://tun.fi/HR.168	Luomus, University of Eastern Finland	Gede. c. 1500 m	GX.270
PRESERVED_SPECIMEN	Diplazium speciosum Blume	SPECIES	ID	http://data.biodiversitydata.nl/naturalis/specimen/L.3541882	L.3541882	Diplazium	speciosum	Indonesia	1949	1949-10-17	Kawah Wajang.	Holstvoogd C					L	1949/10/17					ASIA	L.3541882	10	17																Plantae	Tracheophyta	Polypodiales	Athyriaceae	Polypodiopsida	Botany	ICN	Plantae|Pteropsida|Polypodiales|Dryopteridaceae
PRESERVED_SPECIMEN	Diplazium subserratum	species	ID	http://id.luomus.fi/EIG.3402	EIG.3402	Diplazium	subserratum	Indonesia	1893	1893-06-01	Mount Salak	Möller, Hjalmar					H	01.06.1893		Java			Asia	http://tun.fi/MY.713718	6	1	West Java	1492083909							H1127451	http://tun.fi/HR.168	Luomus, University of Eastern Finland	PLANTAE JAVANICAE. Salak c. 1500 m.	GX.231
PRESERVED_SPECIMEN	Diplazium subserratum	species	ID	http://id.luomus.fi/EIG.3407	EIG.3407	Diplazium	subserratum	Indonesia									H						Asia	http://tun.fi/MY.713733				1492083909							H1127450	http://tun.fi/HR.168	Luomus, University of Eastern Finland	Java.	GX.231
PRESERVED_SPECIMEN	Diplazium unilobum	species	US	http://id.luomus.fi/EIG.3579	EIG.3579	Diplazium	unilobum	United States	1965	1965-06-01/1965-06-30	Cerro la Santa mountain	Sorsa, Veikko				Dms	H	06.1965		Puerto Rico			Central America, South America and the Antarctic	http://tun.fi/MY.714294	6			1492083923	186/1965						H1544727	http://tun.fi/HR.168	Luomus, University of Eastern Finland	Puerto Rico. Cerro La Santa. Forest along road.	GX.2951	18°10'N, 66°04'W (Degrees, minutes)
PRESERVED_SPECIMEN	Diploschistes bartletti Lumbsch	SPECIES	NZ	445eff43-1b1a-4057-b27d-3041a6bb7e10	BM001106162	Diploschistes	bartletti	New Zealand	1983	1983-11-10		John Kenneth Bartlett		-41.838875	171.779913	WGS84	BM		HOLOTYPE				OCEANIA	2415183	11	10		2017-10-13	25905	limestone plateau. In saxo calcareo inter bryophytas vel in strato tenue terrae					NHMUK:ecatalogue:2415183							Fungi	Ascomycota	Ostropales	Graphidaceae	Lecanoromycetes	BOT		Ascomycota; Graphidaceae
PRESERVED_SPECIMEN	Diplycosia brachyantha Sleumer	SPECIES	ID	http://data.biodiversitydata.nl/naturalis/specimen/L.2592773	L.2592773	Diplycosia	brachyantha	Indonesia	1937	1937-02-19	Van bivak 'Halfweg' naar bivak top Goh Lemboek.	Steenis CGGJ van					L	1937/02/19		Sumatra	Bush CM	2010-04-10T00:00:00.000+0000	ASIA	L.2592773	2	19																Plantae	Tracheophyta	Ericales	Ericaceae	Magnoliopsida	Botany	ICN	Plantae|Magnoliopsidae|Ericales|Ericaceae
PRESERVED_SPECIMEN	Disporum cantoniense Merr.	SPECIES	ID	http://data.biodiversitydata.nl/naturalis/specimen/L.1449466	L.1449466	Disporum	cantoniense	Indonesia			Java.	Korthals PW					L			Java	Jessop JP	1975-10-10T00:00:00.000+0000	ASIA	L.1449466																		Plantae	Tracheophyta	Liliales	Colchicaceae	Liliopsida	Botany	ICN	Plantae|Magnoliopsidae|Liliales|Liliaceae
PRESERVED_SPECIMEN	Dissochaeta monticola Blume	SPECIES	ID	http://data.biodiversitydata.nl/naturalis/specimen/U.1394038	U.1394038	Dissochaeta	monticola	Indonesia			Java	Junghuhn FW					L			Java	Maxwell JF	1979-02-01T00:00:00.000+0000	ASIA	U.1394038																		Plantae	Tracheophyta	Myrtales	Melastomataceae	Magnoliopsida	Botany	ICN	Plantae|Magnoliopsidae|Myrtales|Melastomataceae
PRESERVED_SPECIMEN	Ditassa oxyphylla Turcz.	SPECIES	BR	http://specimens.kew.org/herbarium/K000095578	K000095578	Ditassa	oxyphylla	Brazil	1995	1995-03-08	Reserva Biológica de Serra Negra.	Oliveira, M.; Gomes, A.P.S.; Souza, G.M.; Laurênio, A.					K		ISOLECTOTYPE		Goydes, D.J.			K000095578	3	8		2015-02-02	62	Data not transcribed	Data not transcribed											Plantae	Tracheophyta	Gentianales	Apocynaceae	Magnoliopsida	Herbarium		APOCYNACEAE
PRESERVED_SPECIMEN	Dodecatheon meadia f. album J.F.Macbr.	FORM	none	http://www.botanicalcollections.be/specimen/BR0000022761026	BR0000022761026	Dodecatheon	meadia				Amer. sept.	L. Verbeke	album				BR	S.D. (ms. av.)						http://www.botanicalcollections.be/specimen/BR0000022761026				2018-02-13	811								Meise Botanic Garden					Plantae	Tracheophyta	Ericales	Primulaceae	Magnoliopsida		ICBN
PRESERVED_SPECIMEN	Dodonaea truncatiales F.Muell.	SPECIES	AU	http://www.botanicalcollections.be/specimen/BR0000013228224	BR0000013228224	Dodonaea	truncatiales	Australia	1860	1860-09-01	near Twofold Bay	Von Mueller F.					BR							http://www.botanicalcollections.be/specimen/BR0000013228224	9			2013-11-26	S.N.								Meise Botanic Garden					Plantae	Tracheophyta	Sapindales	Sapindaceae	Magnoliopsida		ICBN
PRESERVED_SPECIMEN	Dodonaea viscosa Jacq.	SPECIES	AU	http://www.botanicalcollections.be/specimen/BR0000013228736	BR0000013228736	Dodonaea	viscosa	Australia			Lord Howe's Isl.	Fullager					BR	S.D.						http://www.botanicalcollections.be/specimen/BR0000013228736				2013-11-26	S.N.								Meise Botanic Garden					Plantae	Tracheophyta	Sapindales	Sapindaceae	Magnoliopsida		ICBN
PRESERVED_SPECIMEN	Dombeya Cav.	GENUS	none	http://coldb.mnhn.fr/catalognumber/mnhn/p/p06645707	P06645707	Dombeya											P							http://coldb.mnhn.fr/catalognumber/mnhn/p/p06645707				2015-09-04														Plantae	Tracheophyta	Malvales	Malvaceae	Magnoliopsida	P
PRESERVED_SPECIMEN	Dorstenia foetida var. obovata (A.Rich.) Engl.	VARIETY	ET	http://www.botanicalcollections.be/specimen/BR0000008378613	BR0000008378613	Dorstenia	foetida	Ethiopia	1840	1840-08-05	versus fluvium Tacaze prope Djeladjeranne	Schimper W.G.	obovata				BR		ISOTYPE					http://www.botanicalcollections.be/specimen/BR0000008378613	8	5		2006-12-11	1675								Meise Botanic Garden					Plantae	Tracheophyta	Rosales	Moraceae	Magnoliopsida		ICBN
PRESERVED_SPECIMEN	Dracocephalum ruyschiana L.	SPECIES	EE	TU251841	TU251841	Dracocephalum	ruyschiana	Estonia	1910	1910-01-01		H. Hiir					TU	1910			M. Kask	1969-01-01T00:00:00.000+0000		TU251841						habitat: Tannenwälder (=kuusemets) (Pinus s.)							Natural History Museum, University of Tartu		4			Plantae	Tracheophyta	Lamiales	Lamiaceae	Magnoliopsida	TU		Viridiplantae; Anthophyta; Eudicotyledonae; Lamiales; Lamiaceae; Dracocephalum
PRESERVED_SPECIMEN	Dracocephalum thymiflorum L.	SPECIES	EE	TU255327	TU255327	Dracocephalum	thymiflorum	Estonia	1959	1959-07-17	Viljandi rajoon, Sinihalliku	T. Põlluveer					TU	1959-07-17			M. Kask	1969-01-01T00:00:00.000+0000		TU255327	7	17											Natural History Museum, University of Tartu		4			Plantae	Tracheophyta	Lamiales	Lamiaceae	Magnoliopsida	TU		Viridiplantae; Anthophyta; Eudicotyledonae; Lamiales; Lamiaceae; Dracocephalum
PRESERVED_SPECIMEN	Dracontomelon dao (Blanco) Merr. & Rolfe	SPECIES	ID	http://data.biodiversitydata.nl/naturalis/specimen/L.2259981	L.2259981	Dracontomelon	dao	Indonesia	1991	1991-12-12	East Kalimantan, Wanariset I area, of km 38, Balikpapan-Samarinda road.	Ambriansyah; Arifin Z		-1	117	WGS84	L	1991/12/12		Borneo	Sidiyasa K	1991-12-01T00:00:00.000+0000	ASIA	L.2259981	12	12																Plantae	Tracheophyta	Sapindales	Anacardiaceae	Magnoliopsida	Botany	ICN	Plantae|Magnoliopsidae|Sapindales|Anacardiaceae
PRESERVED_SPECIMEN	Drakaea glyptodon Fitzg.	SPECIES	AU	eb25f2c1-d2b0-4fb7-83dd-160d09bad6d8	BM000990388	Drakaea	glyptodon	Australia				Robert Desmond (David) Fitzgerald					BM		TYPE	Western Australia			OCEANIA	601649				2017-08-21	s.n.						NHMUK:ecatalogue:601649							Plantae	Tracheophyta	Asparagales	Orchidaceae	Liliopsida	BOT		Orchidaceae
PRESERVED_SPECIMEN	Drimys piperita Hook.f.	SPECIES	none	http://coldb.mnhn.fr/catalognumber/mnhn/p/p02132367	P02132367	Drimys	piperita										P							http://coldb.mnhn.fr/catalognumber/mnhn/p/p02132367				2015-09-03														Plantae	Tracheophyta	Canellales	Winteraceae	Magnoliopsida	P
PRESERVED_SPECIMEN	Dryopteris	genus	US	http://id.luomus.fi/EIG.1314	EIG.1314	Dryopteris		United States	1967	1967-07-28	Chugah Mountains, Richardson Highway Mile 23 from Valdez, near Thompson Pass, Blueberry Lake Campground	Ahti, Teuvo					H	28.07.1967		Alaska			North America	http://tun.fi/MY.691204	7	28		1492083459	23047						H1124076	http://tun.fi/HR.168	Luomus, University of Eastern Finland	Chugah Mts., Richardson Hwy Mile 23 (from Valdez), near Thompson Pass, Blueberry Lake Campground, alt. 2500 ft.	GX.231
PRESERVED_SPECIMEN	Dryopteris campyloptera	species	US	http://id.luomus.fi/H.1027364	H.1027364	Dryopteris	campyloptera	United States	1961	1961-06-20	Mount Washington, White Mountains						H	20.06.1961		New Hampshire			North America	http://tun.fi/MY.742897	6	20		1492084399	5692						H1027364	http://tun.fi/HR.168	Luomus, University of Eastern Finland	3700 ft.	GX.231
PRESERVED_SPECIMEN	Dryopteris celsa	species	US	http://id.luomus.fi/H.1027349	H.1027349	Dryopteris	celsa	United States	1971	1971-05-06	Green Mountain, W of Keene, 650´ ( c. 13 mi SE of Charlottesville)						H	06.05.1971		Virginia				http://tun.fi/MY.742882	5	6	Albemarle County	1492084399							H1027349	http://tun.fi/HR.168	Luomus, University of Eastern Finland	grown at Guelph	GX.270
PRESERVED_SPECIMEN	Dryopteris cristata (L) A.Gray	SPECIES	EE	TU261425	TU261425	Dryopteris	cristata	Estonia	1992	1992-06-26	Tipu metskond	J. Ragozina					TU	1992-06-26			J. Ragozina	1992-06-26T00:00:00.000+0000		TU261425	6	26	Viljandi			habitat: segamets							Natural History Museum, University of Tartu		4			Plantae	Tracheophyta	Polypodiales	Dryopteridaceae	Polypodiopsida	TU		Viridiplantae; Monilophyta; Polypodiopsida; Polypodiales; Dryopteridaceae; Dryopteris
PRESERVED_SPECIMEN	Dryopteris khullarii Fraser-Jenk.	SPECIES	IN	99581b29-ee92-459b-b7d4-0a697ca3dceb	BM001066071	Dryopteris	khullarii	India	1978	1978-10-25		Christopher Roy Fraser-Jenkins					BM		HOLOTYPE	Uttar Pradesh	Christopher Roy Fraser-Jenkins		ASIA	1989600	10	25			8353						NHMUK:ecatalogue:1989600							Plantae	Tracheophyta	Polypodiales	Dryopteridaceae	Polypodiopsida	BOT		Dryopteridaceae
PRESERVED_SPECIMEN	Dryopteris pentheri	species	ET	http://id.luomus.fi/EIG.381	EIG.381	Dryopteris	pentheri	Ethiopia	1982	1982-10-27		Kukkonen, Ilkka				Dms	H	27.10.1982		Oromia			Africa	http://tun.fi/MY.715044	10	27	East Shewa	1492083940	12373a						H1489446	http://tun.fi/HR.168	Luomus, University of Eastern Finland	Shewa Adm. Reg. 26 km N of Gedo on the road to Fincha, c. 2900 m.	GX.2951	09°07 N, 37°20 E (degrees, minutes)
PRESERVED_SPECIMEN	Dryopteris pentheri	species	ET	http://id.luomus.fi/EIG.434	EIG.434	Dryopteris	pentheri	Ethiopia	1982	1982-10-27	26 km north of Gedo on the road to Fincha	Kukkonen, Ilkka				Dms	H	27.10.1982					Africa	http://tun.fi/MY.716802	10	27		1492083980	12373						H1489447	http://tun.fi/HR.168	Luomus, University of Eastern Finland	Shewa Adm. Reg., 26 km N of Gedo on the road to Fincha, c. 2900 m.	GX.231	09°07'N; 37°20'E (degrees, minutes)
PRESERVED_SPECIMEN	Dryopteris pentheri	species	ET	http://id.luomus.fi/EIG.435	EIG.435	Dryopteris	pentheri	Ethiopia	1982	1982-11-08	Saneti plateau and Mount Batu; On the way to Saneti plateau from Robe. Steep forested slope of a river canyon	Kukkonen, Ilkka				Dms	H	08.11.1982		Bale			Africa	http://tun.fi/MY.716835	11	8		1492083981	12608						H1489739	http://tun.fi/HR.168	Luomus, University of Eastern Finland	Saneti plateau and Mount Batu, c. 4000-4200m.; On the way to Saneti plateau from Robe. Steep forested slope of a river canyon. Alt. c. 3400 m.	GX.231	06°55'N; 39°40'E (degrees, minutes)
PRESERVED_SPECIMEN	Dryopteris pentheri	species	ET	http://id.luomus.fi/EIG.436	EIG.436	Dryopteris	pentheri	Ethiopia	1958	1958-01-10	Bali highland, Rira, circa 10 km southwest of Batu	Smeds, H.					H	10.01.1958		Bale			Africa	http://tun.fi/MY.716868	1	10		1492083981	540						H1479426	http://tun.fi/HR.168		Bale: Bali highland, Rira, c. 10 km SW of Batu	GX.270
PRESERVED_SPECIMEN	Dryopteris pentheri	species	ET	http://id.luomus.fi/EIG.437	EIG.437	Dryopteris	pentheri	Ethiopia	1958	1958-01-10	Bali highland, Rira, circa 10 km southwest of Batu	Smeds, H.					H	10.01.1958		Bale			Africa	http://tun.fi/MY.716901	1	10		1492083982	540						H1479430	http://tun.fi/HR.168		Bale: Bali highland, Rira, c. 10 km SW of Batu. Alt. 2900 m.	GX.270
PRESERVED_SPECIMEN	Dryopteris pentheri	species	ET	http://id.luomus.fi/EIG.438	EIG.438	Dryopteris	pentheri	Ethiopia	1958	1958-01-10	Bali highland, Rira, circa 10 km southwest of Batu	Smeds, H.					H	10.01.1958		Bale			Africa	http://tun.fi/MY.716934	1	10		1492083983	540						H1479429	http://tun.fi/HR.168	Luomus, University of Eastern Finland	Bale: Bali highland, Rira, c. 10 km SW of Batu. Alt. 2900 m.	GX.2951
PRESERVED_SPECIMEN	Dryopteris pentheri	species	ET	http://id.luomus.fi/EIG.439	EIG.439	Dryopteris	pentheri	Ethiopia	1954	1954-08-16		Roselius, Kurt					H	16.08.1954		Oromia			Africa	http://tun.fi/MY.716967	8	16	Asella	1492083984							H1230908	http://tun.fi/HR.168		Arussi: Aselle.	GX.270
PRESERVED_SPECIMEN	Dryopteris pentheri	species	ET	http://id.luomus.fi/EIG.441	EIG.441	Dryopteris	pentheri	Ethiopia	1954	1954-08-16	Shore of a stream in a forest	Roselius, Kurt					H	16.08.1954		Oromia			Africa	http://tun.fi/MY.717036	8	16	Asella	1492083985							H1230909	http://tun.fi/HR.168	Luomus, University of Eastern Finland	Arussi: Aselle. Shore of a stream in a forest.	GX.2951
PRESERVED_SPECIMEN	Dryopteris schimperiana	species	ET	http://id.luomus.fi/EIG.592	EIG.592	Dryopteris	schimperiana	Ethiopia	1982	1982-10-30	Circa 3 km east of Nekemte	Kukkonen, Ilkka					H	30.10.1982		Oromia			Africa	http://tun.fi/MY.722022	10	30	Nekemte, East Welega	1492084100	14455						H1488428	http://tun.fi/HR.168	Luomus, University of Eastern Finland	WELEGA Adm. Reg., c. 3 km E of Nekemte	GX.270
PRESERVED_SPECIMEN	Dryopteris schimperiana	species	ET	http://id.luomus.fi/EIG.594	EIG.594	Dryopteris	schimperiana	Ethiopia	1957	1957-11-16	15 km east of Shashmanna, on Cotole road	Smeds, Helmer					H	16.11.1957		Arsi			Africa	http://tun.fi/MY.722088	11	16		1492084101	268						H1479217	http://tun.fi/HR.168		Arussi: 15 km E of Shashmanna, on Cotole road. Alt. 2100 m.	GX.270
PRESERVED_SPECIMEN	Dryopteris schimperiana	species	ET	http://id.luomus.fi/EIG.595	EIG.595	Dryopteris	schimperiana	Ethiopia	1957	1957-11-16	15 km east of Shashamane	Smeds, H.					H	16.11.1957		Oromia			Africa	http://tun.fi/MY.722121	11	16	West Arsi	1492084102	268						H1479216	http://tun.fi/HR.168	Luomus, University of Eastern Finland	Arussi: 15 km E of Shashmanna, on Cotole road. Alt. 2100 m.	GX.2951
PRESERVED_SPECIMEN	Dryopteris unidentata	species	US	http://id.luomus.fi/EIG.1068	EIG.1068	Dryopteris	unidentata	United States	1988	1988-02-28	West of Waikapu, forest on south shoulder of Hanaula mountain.						H	28.02.1988		Hawaii			Australia and Oceania	http://tun.fi/MY.683086	2	28	Maui	1492083318	14872						H1669872	http://tun.fi/HR.168		W. Maui, W of Waikapu, forest on S shoulder of Hana'aula mountain. Alt: 4000 ft s.m.	GX.2951
PRESERVED_SPECIMEN	Dryopteris unidentata	species	US	http://id.luomus.fi/EIG.1074	EIG.1074	Dryopteris	unidentata	United States	1948	1948-04-06	In forest on summit of Kohala Mt.	Skottsberg, Carl					H	06.04.1948		Hawaii			Australia and Oceania	http://tun.fi/MY.683287	4	6	Hawaii	1492083321	5008						H1107075	http://tun.fi/HR.168	Luomus, University of Eastern Finland	Hawaii, in forest on summit of Kohala Mts.	GX.270
PRESERVED_SPECIMEN	Dryopteris wallichiana subsp. wallichiana	Ssp	ID	http://id.luomus.fi/EIG.996	EIG.996	Dryopteris	wallichiana	Indonesia	1904	1904-09-01/1904-09-30		Molhyusen, P.	wallichiana				H	09.1904		Java			Asia	http://tun.fi/MY.735360	9			1492084372							H1591080	http://tun.fi/HR.168	Luomus, University of Eastern Finland	Java: in monte Lowongan, regione media 900 m.	GX.270
PRESERVED_SPECIMEN	Dryopteris wallichiana subsp. wallichiana	Ssp	US	http://id.luomus.fi/EIG.1060	EIG.1060	Dryopteris	wallichiana	United States	1988	1988-02-25	West side of Haleakala Mountain, south of Pukalani, above Kula, Waipoli road.	Fraser-Jenkins, C. R.	wallichiana				H	25.02.1988		Hawaii			Australia and Oceania	http://tun.fi/MY.682828	2	25	Maui	1492083312	14783						H1669968	http://tun.fi/HR.168	Luomus, University of Eastern Finland	E. Maui, W side of Haleakala Mountain, S of Pukalani, above Kula, Waipoli road. Alt: c. 3500-4000 ft s.m.	GX.270
PRESERVED_SPECIMEN	Duabanga grandiflora Walp.	SPECIES	none	http://coldb.mnhn.fr/catalognumber/mnhn/p/p05115347	P05115347	Duabanga	grandiflora										P							http://coldb.mnhn.fr/catalognumber/mnhn/p/p05115347				2015-09-05														Plantae	Tracheophyta	Myrtales	Lythraceae	Magnoliopsida	P
PRESERVED_SPECIMEN	Dyera polyphylla (Miq.) Steenis	SPECIES	ID	http://data.biodiversitydata.nl/naturalis/specimen/L.2714152	L.2714152	Dyera	polyphylla	Indonesia				Unknown					L			Sumatra			ASIA	L.2714152																		Plantae	Tracheophyta	Gentianales	Apocynaceae	Magnoliopsida	Botany	ICN	Plantae|Magnoliopsidae|Gentianales|Apocynaceae
PRESERVED_SPECIMEN	Dysoxylum pachyrhache Merr.	SPECIES	ID	http://data.biodiversitydata.nl/naturalis/specimen/L.2153797	L.2153797	Dysoxylum	pachyrhache	Indonesia	1951	1951-03-10	Nunukan island (off E. Borneo in Celebes Sea, near British border)	Paymans K					L	1951/03/10		Borneo	Mabberley DJ	1982-11-15T00:00:00.000+0000	ASIA	L.2153797	3	10																Plantae	Tracheophyta	Sapindales	Meliaceae	Magnoliopsida	Botany	ICN	Plantae|Magnoliopsidae|Sapindales|Meliaceae
PRESERVED_SPECIMEN	Dysoxylum spectabile Hook.f.	SPECIES	NZ	http://www.botanicalcollections.be/specimen/BR0000024620970	BR0000024620970	Dysoxylum	spectabile	New Zealand	1980	1980-02-14	Waikanae 50 km nord wellington	Collector unknown		-40.883333	175.066667	WGS84	BR	14-02-80						http://www.botanicalcollections.be/specimen/BR0000024620970	2	14		2017-07-13	S.N								Meise Botanic Garden					Plantae	Tracheophyta	Sapindales	Meliaceae	Magnoliopsida		ICBN
PRESERVED_SPECIMEN	Dysoxylum spectabile Hook.f.	SPECIES	NZ	http://www.botanicalcollections.be/specimen/BR0000024620987	BR0000024620987	Dysoxylum	spectabile	New Zealand	1980	1980-02-14	Waikanae 50 km nord wellington	Collector unknown		-40.883333	175.066667	WGS84	BR	14-02-80						http://www.botanicalcollections.be/specimen/BR0000024620987	2	14		2017-07-13	S.N								Meise Botanic Garden					Plantae	Tracheophyta	Sapindales	Meliaceae	Magnoliopsida		ICBN
PRESERVED_SPECIMEN	Ebenus pinnata Ait.	SPECIES	none	http://coldb.mnhn.fr/catalognumber/mnhn/p/p02881107	P02881107	Ebenus	pinnata										P							http://coldb.mnhn.fr/catalognumber/mnhn/p/p02881107				2015-09-04														Plantae	Tracheophyta	Fabales	Fabaceae	Magnoliopsida	P
PRESERVED_SPECIMEN	Echium versicolor H.Lindb.	species	MA	http://id.luomus.fi/HA.H1406936	HA.H1406936	Echium	versicolor	MA	1926	1926-06-03	Near Tinitine	Lindberg, H. (3501)					H		Type	Marrakech-Tensift-Al Haouz	Harald Lindberg		Africa	http://tun.fi/MY.106544	6	3		1382503594		in decliv. sicc. lapid. calc.				1 300 meters	H1406936	http://tun.fi/HR.129	Luomus	Atlas Magnum, in convalle fl. Aït Messane, in decliv. sicc. lapid. calc. pr. pag. Tinitine.	GX.22	31.1838, -7.9413	H.Lindb.
PRESERVED_SPECIMEN	Echium vulgare L.	SPECIES	GB	dee7964f-46cb-495f-b132-c1be0dbaf2b0	BM001037513	Echium	vulgare	United Kingdom	1960	1960-08-03		Edward Benedict Bangerter		55.635058	-2.351012	WGS84	BM			Scotland			EUROPE	2296387	8	3			978	River banks					NHMUK:ecatalogue:2296387							Plantae	Tracheophyta	Boraginales	Boraginaceae	Magnoliopsida	BOT		Dicotyledones; Boraginaceae
PRESERVED_SPECIMEN	Edwardsia grandiflora Salisb.	SPECIES	NZ	7dab523f-d6b2-4a8f-958c-fc801c3dedb3	BM001209655	Sophora	grandiflora	New Zealand	1769	1769-01-01		Joseph Banks, Daniel Carl Solander					BM				Pu-Chiu Tsoong		OCEANIA	7986989											NHMUK:ecatalogue:7986989							Plantae	Tracheophyta	Fabales	Fabaceae	Magnoliopsida	BOT		Fabaceae
PRESERVED_SPECIMEN	Egregia menziesii (Turner) Areschoug	SPECIES	US	dcbd25c9-bd71-42ae-9bbd-705f2aef70c7	BM000937184	Egregia	menziesii	United States			Nearest Named Place: Pacific Northwest	Archibald Menzies					BM						NORTH_AMERICA	75				2017-08-21	s.n.						NHMUK:ecatalogue:75							Chromista	Ochrophyta	Laminariales	Lessoniaceae	Phaeophyceae	BOT		Lessoniaceae
PRESERVED_SPECIMEN	Ehretia macrophylla Wall.	SPECIES	CN	http://data.rbge.org.uk/herb/E00792879	E00792879	Ehretia	macrophylla	China				Henry, Augustine					E							http://data.rbge.org.uk/herb/E00792879				2016-07-22							BGBASE:809133	http://biocol.org/urn:lsid:biocol.org:col:15670						Plantae	Tracheophyta	Boraginales	Ehretiaceae	Magnoliopsida	E	ICBN
PRESERVED_SPECIMEN	Elaeagnus argentea Pursh	SPECIES	EE	TU301290	TU301290	Elaeagnus	argentea	Estonia	1989	1989-07-16	Võru raj., Bobrovo järvest põhja pool	K. Kirs					TU	1989-07-16			K. Kirs	1989-07-16T00:00:00.000+0000		TU301290	7	16				habitat: teeserv, õues							Natural History Museum, University of Tartu		4			Plantae	Tracheophyta	Rosales	Elaeagnaceae	Magnoliopsida	TU		Viridiplantae; Anthophyta; Eudicotyledonae; Rosales; Elaeagnaceae; Elaeagnus
PRESERVED_SPECIMEN	Elaeocarpus robustus Wall.	SPECIES	US	http://www.botanicalcollections.be/specimen/BR0000024937405	BR0000024937405	Elaeocarpus	robustus	United States	1827	1827-01-01	Amherst	Wallich N.					BR							http://www.botanicalcollections.be/specimen/BR0000024937405				2017-03-31	6857A								Meise Botanic Garden					Plantae	Tracheophyta	Oxalidales	Elaeocarpaceae	Magnoliopsida		ICBN
PRESERVED_SPECIMEN	Elaphoglossum alatum	species	US	http://id.luomus.fi/EIG.6951	EIG.6951	Elaphoglossum	alatum	United States	1948	1948-02-18	Molokai, Pelekunu Valley, above Kolekole Cabin						H	18.02.1948		Hawaii			Australia and Oceania	http://tun.fi/MY.725436	2	18	Maui County	1492084168							H1123944	http://tun.fi/HR.168	Luomus, University of Eastern Finland	Pelekunu Pali	GX.270
PRESERVED_SPECIMEN	Elaphoglossum blumeanum	species	ID	http://id.luomus.fi/EIG.6959	EIG.6959	Elaphoglossum	blumeanum	Indonesia			Java, Mount [Sedde?]	Molhuysen, P					H	02.09.					Asia	http://tun.fi/MY.725460				1492084169							H1590310	http://tun.fi/HR.168	Luomus, University of Eastern Finland	1000 m.	GX.2951
PRESERVED_SPECIMEN	Elaphoglossum burchellii	species	BR	http://id.luomus.fi/EIG.6960	EIG.6960	Elaphoglossum	burchellii	Brazil	1982	1982-01-21	Fda. Sta. Rita, municipality Palmeira	Oliveira, P. I.					H	21.01.1982		Paraná			Central America, South America and the Antarctic	http://tun.fi/MY.725466	1	21		1492084169	295						H1599698	http://tun.fi/HR.168	Luomus, University of Eastern Finland		GX.231
PRESERVED_SPECIMEN	Elaphoglossum callifolium	species	ID	http://id.luomus.fi/EIG.6962	EIG.6962	Elaphoglossum	callifolium	Indonesia	1897	1897-04-25	Mount Gede	Möller, Hjalmar					H	25.04.1897		West Java			Asia	http://tun.fi/MY.725472	4	25		1492084169							H1123940	http://tun.fi/HR.168	Luomus, University of Eastern Finland	Gedé. 2600 m.	GX.270
PRESERVED_SPECIMEN	Elaphoglossum pumilum Lam & Verhey ex H.J.Lam	SPECIES	ID	http://data.biodiversitydata.nl/naturalis/specimen/L%20%200051604	L 0051604	Elaphoglossum	pumilum	Indonesia			Lompo Batang (Z.top van den Piek van Bonthain)Z.Celebes.	Monod de Froideville C					L	1938/01/31 | 1938/01/01	TYPE	Sulawesi			ASIA	L 0051604																		Plantae	Tracheophyta	Polypodiales	Dryopteridaceae	Polypodiopsida	Botany	ICN	Plantae|Pteropsida|Polypodiales|Lomariopsidaceae
PRESERVED_SPECIMEN	Elaphoglossum rigidum	species	US	http://id.luomus.fi/EIG.7034	EIG.7034	Elaphoglossum	rigidum	United States	1965	1965-06-01/1965-06-30	El Verde. Radiation field and its surroundings.	Sorsa, Veikko				Dms	H	06.1965		Puerto Rico			Central America, South America and the Antarctic	http://tun.fi/MY.725712	6			1492084174	105/1965						H1544788	http://tun.fi/HR.168	Luomus, University of Eastern Finland	50 m E from the radiation center.	GX.270	18°21’ N 65°50’ W (degrees, minutes)
PRESERVED_SPECIMEN	Elatine hexandra DC.	SPECIES	BE	http://www.botanicalcollections.be/specimen/BR0000010357743	BR0000010357743	Elatine	hexandra	Belgium	1862	1862-08-26	Diepenbeek	Vandenborn H.					BR							http://www.botanicalcollections.be/specimen/BR0000010357743	8	26		2017-04-05	S.N.								Meise Botanic Garden					Plantae	Tracheophyta	Malpighiales	Elatinaceae	Magnoliopsida		ICBN
PRESERVED_SPECIMEN	Eleocharis mamillata H.Lindb.	SPECIES	EE	TU261475	TU261475	Eleocharis	mamillata	Estonia	1934	1934-08-01	Eor, Kasepää küla lähedal, Peipsi	K. Eichwald					TU	1934-08-01			K. Eichwald	1934-08-01T00:00:00.000+0000		TU261475	8	1				habitat: üleujutatav rand					2726.		Natural History Museum, University of Tartu		4			Plantae	Tracheophyta	Poales	Cyperaceae	Liliopsida	TU		Viridiplantae; Anthophyta; Monocotyledonae; Poales; Cyperaceae; Eleocharis
PRESERVED_SPECIMEN	Eleocharis palustris (L.) Roem. & Schult.	SPECIES	KR	http://coldb.mnhn.fr/catalognumber/mnhn/p/p00067887	P00067887	Eleocharis	palustris	Korea, Republic of	1901	1901-06-01		Faurie, U.J.					P							http://coldb.mnhn.fr/catalognumber/mnhn/p/p00067887	6	1		2015-09-03										Séoul				Plantae	Tracheophyta	Poales	Cyperaceae	Liliopsida	P
PRESERVED_SPECIMEN	Eleocharis palustris subsp. vulgaris Walters	SUBSPECIES	EE	TU276655	TU276655	Eleocharis	palustris	Estonia	1972	1972-07-30	Põlva rajoon, Kanepi, Jõksi järve	L. Pihlapuu	vulgaris				TU	1972-07-30			H. Krall	2001-01-01T00:00:00.000+0000		TU276655	7	30				habitat: madalas rannavees							Natural History Museum, University of Tartu		4			Plantae	Tracheophyta	Poales	Cyperaceae	Liliopsida	TU		Viridiplantae; Anthophyta; Monocotyledonae; Poales; Cyperaceae; Eleocharis
PRESERVED_SPECIMEN	Eleocharis uniglumis Schult. & Zinserl.	SPECIES	EE	TU276694	TU276694	Eleocharis	uniglumis	Estonia	1994	1994-07-08	Vormsi, Östergrundeti poolsaar	J. Jelina					TU	1994-07-08			Aino Kalda	2004-06-02T00:00:00.000+0000		TU276694	7	8											Natural History Museum, University of Tartu		4			Plantae	Tracheophyta	Poales	Cyperaceae	Liliopsida	TU		Viridiplantae; Anthophyta; Monocotyledonae; Poales; Cyperaceae; Eleocharis
PRESERVED_SPECIMEN	Elephantopus scaber L.	SPECIES	ID	http://data.biodiversitydata.nl/naturalis/specimen/U.1113395	U.1113395	Elytropappus	scaber	Indonesia			Java. Semarang.	Kooper WJC					L	1982/07/31 | 1982/07/01					ASIA	U.1113395																		Plantae	Tracheophyta	Asterales	Asteraceae	Magnoliopsida	Botany	ICN	Plantae|Magnoliopsidae|Asterales|Compositae
PRESERVED_SPECIMEN	Eleusine indica (L.) Gaertn.	SPECIES	BR	http://specimens.kew.org/herbarium/K001075217	K001075217	Eleusine	indica	Brazil	1965	1965-12-14	25 km N of Brasília.	Souza, R.; Irwin, H.S.; Santos, R.R.					K				Davidse, G.			K001075217	12	14		2015-02-20	11276	Data not transcribed	Data not transcribed											Plantae	Tracheophyta	Poales	Poaceae	Liliopsida	Herbarium		POACEAE
PRESERVED_SPECIMEN	Elleanthus graminifolius (Barb.Rodr.) Lojtnant	SPECIES	none	http://coldb.mnhn.fr/catalognumber/mnhn/p/p02082947	P02082947	Elleanthus	graminifolius										P							http://coldb.mnhn.fr/catalognumber/mnhn/p/p02082947				2017-05-24														Plantae	Tracheophyta	Asparagales	Orchidaceae	Liliopsida	P
PRESERVED_SPECIMEN	Elsholtzia densa Benth.	SPECIES	CN	http://data.rbge.org.uk/herb/E00275775	E00275775	Elsholtzia	densa	China			Terra Tangutorum.	Przewalski, Nikolai Michailowicz					E			Gansu Province				http://data.rbge.org.uk/herb/E00275775				2011-02-07	1872						BGBASE:312789	http://biocol.org/urn:lsid:biocol.org:col:15670						Plantae	Tracheophyta	Lamiales	Lamiaceae	Magnoliopsida	E	ICBN
PRESERVED_SPECIMEN	Elymus intermedius M.Bieb.	species	GE	http://id.luomus.fi/HA.H1183598	HA.H1183598	Elymus	intermedius	GE	1985	1985-01-01/1985-12-31	Karajoes [Karayaeskaya step], Iberia.	Not on sheet					H		Holotype		Signe Fredriksen	1985		http://tun.fi/MY.102976				1382503569							H1183598	http://tun.fi/HR.129	Luomus		GX.22		M.Bieb.
PRESERVED_SPECIMEN	Elymus repens (L.) Gould	SPECIES	EE	TU304279	TU304279	Elymus	repens	Estonia	1954	1954-07-10	Tartu	A. Remmel					TU	1954-07-10			L. Viljasoo	1954-07-10T00:00:00.000+0000		TU304279	7	10				habitat: raudtee tamm							Natural History Museum, University of Tartu		4			Plantae	Tracheophyta	Poales	Poaceae	Liliopsida	TU		Viridiplantae; Anthophyta; Monocotyledonae; Poales; Poaceae; Elymus
PRESERVED_SPECIMEN	Encyothalia cliftonii Harv.	SPECIES	AU	c7486490-51de-4110-bde9-7b7886914063	BM001044551	Encyothalia	cliftonii	Australia				E Lempriere					BM			Western Australia			OCEANIA	623127				2017-08-21	s.n.						NHMUK:ecatalogue:623127							Chromista	Ochrophyta	Sporochnales	Sporochnaceae	Phaeophyceae	BOT		Sporochnaceae
PRESERVED_SPECIMEN	Engelhardia spicata Lesch. ex Bl.	SPECIES	ID	http://data.biodiversitydata.nl/naturalis/specimen/L.1552246	L.1552246	Engelhardia	spicata	Indonesia			Java, resid. Madioen, G. Lawu bos Sarengan.	Dorgelo JD					L	1923/10/31 | 1923/10/01		Java	Jacobs M	1960-04-01T00:00:00.000+0000	ASIA	L.1552246																		Plantae	Tracheophyta	Fagales	Juglandaceae	Magnoliopsida	Botany	ICN	Plantae|Magnoliopsidae|Fagales|Juglandaceae
PRESERVED_SPECIMEN	Englerodendron korupense Burgt	SPECIES	CM	http://data.biodiversitydata.nl/naturalis/specimen/WAG0204647	WAG0204647	Englerodendron	korupense	Cameroon	2005	2005-04-06	Korup National Park, NW plot near P transect, subplot 44LN.	Burgt XM van der		5.016667	8.783333	WGS84	L	2005/04/06	HOLOTYPE	South-West Region	Burgt XM van der	2005-06-01T00:00:00.000+0000	AFRICA	WAG0204647	4	6																Plantae	Tracheophyta	Fabales	Fabaceae	Magnoliopsida	Botany	ICN	Plantae|Magnoliopsidae|Fabales|Leguminosae-Caes.
PRESERVED_SPECIMEN	Epipactis helleborine (L.) Crantz	SPECIES	EE	TU254233	TU254233	Epipactis	helleborine	Estonia	1933	1933-08-01	Kihelkonna, Himmiste külast läänes	B. Saarson					TU	1933-08-01			Kaili Orav	2008-12-23T00:00:00.000+0000		TU254233	8	1	Saare maakond			habitat: kuival puisniidul			Etiketil: Epipactis latifolia All.		1677		Natural History Museum, University of Tartu		4			Plantae	Tracheophyta	Asparagales	Orchidaceae	Liliopsida	TU		Viridiplantae; Anthophyta; Monocotyledonae; Asparagales; Orchidaceae; Epipactis
PRESERVED_SPECIMEN	Equisetum L.	GENUS	GB	http://data.rbge.org.uk/herb/E00424650	E00424650	Equisetum		United Kingdom	1978	1978-07-05		Ferreira, R.E.C.					E	1978-07-05		Scotland				http://data.rbge.org.uk/herb/E00424650	7	5	(VC 108) West Sutherland	2013-11-25	3044						BGBASE:455434	http://biocol.org/urn:lsid:biocol.org:col:15670						Plantae	Tracheophyta	Equisetales	Equisetaceae	Equisetopsida	E	ICBN
PRESERVED_SPECIMEN	Equisetum variegatum Schleich. ex F.Weber & D.Mohr	SPECIES	BE	http://www.botanicalcollections.be/specimen/BR0000024923699	BR0000024923699	Equisetum	variegatum	Belgium	1890	1890-09-10	entre Coxyde et La Panne	Léonard					BR							http://www.botanicalcollections.be/specimen/BR0000024923699	9	10		2017-04-05	S.N.								Meise Botanic Garden					Plantae	Tracheophyta	Equisetales	Equisetaceae	Equisetopsida		ICBN
PRESERVED_SPECIMEN	Eragrostis frankii Steud.	SPECIES	US	http://www.botanicalcollections.be/specimen/BR0000027579701V	BR0000027579701V	Eragrostis	frankii	United States	1875	1875-09-25	St. Louis, MO	Eggert H.					BR							http://www.botanicalcollections.be/specimen/BR0000027579701V	9	25		2017-10-09	S.N.								Meise Botanic Garden					Plantae	Tracheophyta	Poales	Poaceae	Liliopsida		ICBN
PRESERVED_SPECIMEN	Eragrostis rottleri Stapf	SPECIES	IN	http://data.rbge.org.uk/herb/E00393636	E00393636	Eragrostis	rottleri	India	1824	1824-01-01	Munargoody [Mannargudi]	Wight, Robert					E	1824	SYNTYPE					http://data.rbge.org.uk/herb/E00393636				2010-07-14	1785						BGBASE:434889	http://biocol.org/urn:lsid:biocol.org:col:15670						Plantae	Tracheophyta	Poales	Poaceae	Liliopsida	E	ICBN
PRESERVED_SPECIMEN	Eria ovata Lindl.	SPECIES	PH	http://data.biodiversitydata.nl/naturalis/specimen/L%20%200059912	L 0059912	Pinalia	ovata	Philippines			PhilippinesBohol	Cuming H					L	1841/01/31 | 1841/01/01	ISOTYPE	Bohol			ASIA	L 0059912																		Plantae	Tracheophyta	Asparagales	Orchidaceae	Liliopsida	Botany	ICN	Plantae|Magnoliopsidae|Asparagales|Orchidaceae
PRESERVED_SPECIMEN	Erica ciliaris L.	SPECIES	FR	http://coldb.mnhn.fr/catalognumber/mnhn/p/p00377547	P00377547	Erica	ciliaris	France	1874	1874-09-15		Garoutte|Arnaud					P			47 Lot-et-Garonne				http://coldb.mnhn.fr/catalognumber/mnhn/p/p00377547	9	15	durance	2015-09-04										Durance (Lot-et-Garonne) : dans les landes				Plantae	Tracheophyta	Ericales	Ericaceae	Magnoliopsida	P
PRESERVED_SPECIMEN	Erica scoparia L.	SPECIES	FR	http://coldb.mnhn.fr/catalognumber/mnhn/p/p00419257	P00419257	Erica	scoparia	France	1853	1853-08-05		Tardieu, M.					P			78 Yvelines				http://coldb.mnhn.fr/catalognumber/mnhn/p/p00419257	8	5	st-léger-en-yvelines	2015-09-03										bruyères de la Jaunière, au bois de la Charmoise (env. de St-Léger)				Plantae	Tracheophyta	Ericales	Ericaceae	Magnoliopsida	P
PRESERVED_SPECIMEN	Erinus verticillatus Mill.	SPECIES	MX	6f92d9ec-0672-47a1-bc32-f5001b169a1f	BM000956463	Stemodia	verticillatus	Mexico	1731	1731-01-01	Vera Cruz	W Houston					BM		HOLOTYPE		Maarten Joost Maria Christenhusz		NORTH_AMERICA	741470				2018-01-11	s.n.						NHMUK:ecatalogue:741470							Plantae	Tracheophyta	Lamiales	Plantaginaceae	Magnoliopsida	BOT		Scrophulariaceae
PRESERVED_SPECIMEN	Eriope luetzelburgii Harley	SPECIES	BR	http://specimens.kew.org/herbarium/K000488151	K000488151	Eriope	luetzelburgii	Brazil	1988	1988-10-29	Mun.: Rio de Contas. Pico das Almas: vertente leste. Entre Junco-Faz. Brumadinho, 10 km ao N-O da cidade.	Hind, D.J.N.; Fothergill, J.M.; Simão, R.; Harley, R.M.		-13.53	-41.9	WGS84	K		ISOTYPE		Harley, R.M.			K000488151	10	29		2007-05-11	25736	Cerrado de altitude com afloramento rochoso. Entre pedras.	Arbusto pouco ramificado, até 2.5m de altura. Caules brancos com cêra. Folhas verdes. Cálice brilhante, marrom-chocolate. Corola violeta-arroxeado com padrão de uma mancha branca com pontos violetas no lábio superior.	0.2										Plantae	Tracheophyta	Lamiales	Lamiaceae	Magnoliopsida	Herbarium		LABIATAE
PRESERVED_SPECIMEN	Eriophorum angustifolium Honck.	SPECIES	EE	TU276774	TU276774	Eriophorum	angustifolium	Estonia	1994	1994-07-13	Hullo	L. Sillaots					TU	1994-07-13			L. Sillaots	1994-07-13T00:00:00.000+0000		TU276774	7	13				habitat: soine niit							Natural History Museum, University of Tartu		4			Plantae	Tracheophyta	Poales	Cyperaceae	Liliopsida	TU		Viridiplantae; Anthophyta; Monocotyledonae; Poales; Cyperaceae; Eriophorum
PRESERVED_SPECIMEN	Eriophorum gracile W.D.J.Koch ex Roth	SPECIES	EE	TU251916	TU251916	Eriophorum	gracile	Estonia	1928	1928-07-02		T. Lippmaa					TU	1928-07-02			T. Lippmaa	1928-07-02T00:00:00.000+0000		TU251916	7	2	Pärnu maakond			habitat: lodust					3505		Natural History Museum, University of Tartu		4			Plantae	Tracheophyta	Poales	Cyperaceae	Liliopsida	TU		Viridiplantae; Anthophyta; Monocotyledonae; Poales; Cyperaceae; Eriophorum
PRESERVED_SPECIMEN	Eriophorum gracile W.D.J.Koch ex Roth	SPECIES	EE	TU269504	TU269504	Eriophorum	gracile	Estonia	1930	1930-06-15		H. Salasoo					TU	1930-06-15			H. Salasoo	1930-06-15T00:00:00.000+0000		TU269504	6	15				habitat: rabal Saatjad: Carex limosa, Scheuchzeria palustris, Comarum palustre, Menyanthes trifoliata, Oxycoccus palustris							Natural History Museum, University of Tartu		4			Plantae	Tracheophyta	Poales	Cyperaceae	Liliopsida	TU		Viridiplantae; Anthophyta; Monocotyledonae; Poales; Cyperaceae; Eriophorum
PRESERVED_SPECIMEN	Eriophorum vaginatum L.	SPECIES	EE	TU276959	TU276959	Eriophorum	vaginatum	Estonia	1988	1988-07-16	Harju rajoon, Muuksi, Kahala järve äärne	Vunk					TU	1988-07-16			Vunk	1988-07-16T00:00:00.000+0000		TU276959	7	16				habitat: raba							Natural History Museum, University of Tartu		4			Plantae	Tracheophyta	Poales	Cyperaceae	Liliopsida	TU		Viridiplantae; Anthophyta; Monocotyledonae; Poales; Cyperaceae; Eriophorum
PRESERVED_SPECIMEN	Eriostemon australasius Pers.	SPECIES	AU	http://www.botanicalcollections.be/specimen/BR0000005784516	BR0000005784516	Eriostemon	australasius	Australia			Port Jackson	Wilhelm C.					BR	S.D.						http://www.botanicalcollections.be/specimen/BR0000005784516				2011-10-25	S.N.								Meise Botanic Garden					Plantae	Tracheophyta	Sapindales	Rutaceae	Magnoliopsida		ICBN
PRESERVED_SPECIMEN	Eriostemon australasius Pers.	SPECIES	AU	http://www.botanicalcollections.be/specimen/BR0000005784875	BR0000005784875	Eriostemon	australasius	Australia			S.L.	Sieber F.W.					BR	S.D.						http://www.botanicalcollections.be/specimen/BR0000005784875				2011-10-25	S.N.								Meise Botanic Garden					Plantae	Tracheophyta	Sapindales	Rutaceae	Magnoliopsida		ICBN
PRESERVED_SPECIMEN	Eriostemon difformis A.Cunn. ex Endl.	SPECIES	AU	http://www.botanicalcollections.be/specimen/BR0000005783847	BR0000005783847	Philotheca	difformis	Australia			Grampians	Wilhelm C.					BR	S.D.						http://www.botanicalcollections.be/specimen/BR0000005783847				2011-10-25	S.N.								Meise Botanic Garden					Plantae	Tracheophyta	Sapindales	Rutaceae	Magnoliopsida		ICBN
PRESERVED_SPECIMEN	Erophila verna (L.) Chevall.	SPECIES	EE	TU261559	TU261559	Draba	verna	Estonia	1954	1954-05-03	Tartu rajoon, kolh. Punane Täht	P. Põldmaa					TU	1954-05-03			Kaili Orav	2013-04-16T00:00:00.000+0000		TU261559	5	3				habitat: põllult					90		Natural History Museum, University of Tartu		4			Plantae	Tracheophyta	Brassicales	Brassicaceae	Magnoliopsida	TU		Viridiplantae; Anthophyta; Eudicotyledonae; Brassicales; Brassicaceae; Erophila
PRESERVED_SPECIMEN	Erophila verna (L.) Chevall.	SPECIES	EE	TU261563	TU261563	Draba	verna	Estonia	1972	1972-05-04	Kingissepa rajoon, Abruka saar, külavahe	M. Köster					TU	1972-05-04			M. Köster	1972-05-04T00:00:00.000+0000		TU261563	5	4				habitat: tee ääres							Natural History Museum, University of Tartu		4			Plantae	Tracheophyta	Brassicales	Brassicaceae	Magnoliopsida	TU		Viridiplantae; Anthophyta; Eudicotyledonae; Brassicales; Brassicaceae; Erophila
PRESERVED_SPECIMEN	Erucastrum gallicum O.E.Schulz	SPECIES	NL	http://data.biodiversitydata.nl/naturalis/specimen/L.3240152	L.3240152	Erucastrum	gallicum	Netherlands	1964	1964-07-11	Veenen.	Baaijens M; Jong G de; Vermast L; Ploeg DTE van der					L	1964/07/11					EUROPE	L.3240152	7	11																Plantae	Tracheophyta	Brassicales	Brassicaceae	Magnoliopsida	Botany	ICN	Plantae|Magnoliopsidae|Brassicales|Cruciferae
PRESERVED_SPECIMEN	Erycibe villosa L.L.Forman	SPECIES	BN	http://specimens.kew.org/herbarium/K000830619	K000830619	Erycibe	villosa	Brunei Darussalam	1991	1991-08-20	Tutong district, Andulau F.R., Bukit Basong.	Nangkat, N.					K		HOLOTYPE					K000830619	8	20		2012-07-24	314	Heath forest.	Climber up to 10 m high; 3 cm diam. Fruits globose. Leaves villose. 5 sepals, imbricate; corolla ? absent; stamens ? absent; ovary glabrous with peltate, ridged stigma											Plantae	Tracheophyta	Solanales	Convolvulaceae	Magnoliopsida	Herbarium		CONVOLVULACEAE
PRESERVED_SPECIMEN	Erysimum hieraciifolium L.	SPECIES	none	http://coldb.mnhn.fr/catalognumber/mnhn/p/p04740107	P04740107	Erysimum	hieraciifolium										P							http://coldb.mnhn.fr/catalognumber/mnhn/p/p04740107				2015-09-05														Plantae	Tracheophyta	Brassicales	Brassicaceae	Magnoliopsida	P
PRESERVED_SPECIMEN	Erythrina numerosa A.R.Bean	SPECIES	AU	http://specimens.kew.org/herbarium/K000858636	K000858636	Erythrina	numerosa	Australia	1991	1991-02-10	Moreton; Splityard Creek, Wivenhoe Dam.	Bird, L.H.; Sharpe, P.R.		-27.38	152.63	WGS84	K		ISOTYPE		Bean, A.R.	2009-02-03T00:00:00.000+0000		K000858636	2	10		2012-11-26	s.n.	On red euchrozem soil, in araucarian microphyll vine forest.	Tree to 10 meters; smooth trunk; fruiting; red seed.	0.2										Plantae	Tracheophyta	Fabales	Fabaceae	Magnoliopsida	Herbarium		LEGUMINOSAE-PAPILIONOIDEAE
PRESERVED_SPECIMEN	Erythrodermis traillii (Holmes ex Batters) Guiry & Garbary	SPECIES	GB	http://data.rbge.org.uk/herb/E00718331	E00718331	Erythrodermis	traillii	United Kingdom	1967	1967-08-16	Edinburgh, Joppa	Irvine, D.E.G.					E	1967-08-16		Scotland				http://data.rbge.org.uk/herb/E00718331	8	16	(VC 83) Midlothian	2015-07-16	1257A						BGBASE:730454	http://biocol.org/urn:lsid:biocol.org:col:15670						Plantae	Rhodophyta	Gigartinales	Phyllophoraceae	Florideophyceae	E	ICBN
PRESERVED_SPECIMEN	Erythroxylum suberosum A.St.-Hil.	SPECIES	BR	http://specimens.kew.org/herbarium/K000996455	K000996455	Erythroxylum	suberosum	Brazil	1902	1902-10-09	S. Anna da Chapada.	Robert, A.					K				Plowman, T.C.			K000996455	10	9		2015-01-21	604													Plantae	Tracheophyta	Malpighiales	Erythroxylaceae	Magnoliopsida	Herbarium		ERYTHROXYLACEAE
PRESERVED_SPECIMEN	Etlingera belalongensis A.D.Poulsen	SPECIES	BN	http://data.rbge.org.uk/herb/E00177150	E00177150	Etlingera	belalongensis	Brunei Darussalam	1991	1991-03-27	Batu Apoi Forest Reserve. Setap shale formation. Ridge W. of Kuala Belalong Field Studies Centre Slope. Near Danish Plot	Poulsen, Axel Dalberg		4.55	115.15	WGS84	E	1991-03-27	ISOTYPE	Temburong				http://data.rbge.org.uk/herb/E00177150	3	27		2009-06-05	130					220 M	BGBASE:186505	http://biocol.org/urn:lsid:biocol.org:col:15670						Plantae	Tracheophyta	Zingiberales	Zingiberaceae	Liliopsida	E	ICBN
PRESERVED_SPECIMEN	Etlingera palangkensis A.Takano & Nagam.	SPECIES	ID	http://data.rbge.org.uk/herb/E00214999	E00214999	Etlingera	palangkensis	Indonesia	2004	2004-12-14	Palangka Raya. Jl. Tijilik Riwut km. 28	Okada, H.; Nagamasu, H.; Tsukaya, H.; Takano, A.; Naiki, A.		-1.833333	113.833333	WGS84	E	2004-12-14	ISOTYPE	Kalimantan Tengah				http://data.rbge.org.uk/herb/E00214999	12	14		2017-05-09	KT 627						BGBASE:227423	http://biocol.org/urn:lsid:biocol.org:col:15670						Plantae	Tracheophyta	Zingiberales	Zingiberaceae	Liliopsida	E	ICBN
PRESERVED_SPECIMEN	Eucryphia lucida (Labill.) Baill.	SPECIES	AU	http://www.botanicalcollections.be/specimen/BR0000013308858	BR0000013308858	Eucryphia	lucida	Australia	1819	1819-01-01	Van Diem. Land	Collector unknown					BR							http://www.botanicalcollections.be/specimen/BR0000013308858				2012-10-02	S.N.								Meise Botanic Garden					Plantae	Tracheophyta	Oxalidales	Cunoniaceae	Magnoliopsida		ICBN
PRESERVED_SPECIMEN	Eugenia Mich. ex L.	GENUS	ID	http://data.biodiversitydata.nl/naturalis/specimen/L.2509958	L.2509958	Eugenia		Indonesia	1948	1948-09-30	Borneo; Pontianak; Mampawah.	Enoh M					L	1948/09/30		Borneo	Unknown		ASIA	L.2509958	9	30																Plantae	Tracheophyta	Myrtales	Myrtaceae	Magnoliopsida	Botany	ICN	Plantae|Magnoliopsidae|Myrtales|Myrtaceae
PRESERVED_SPECIMEN	Euodia labordei Dode	SPECIES	CN	http://coldb.mnhn.fr/catalognumber/mnhn/p/p02440827	P02440827	Tetradium	labordei	China	1899	1899-09-11		Bodinier, E.|Laborde, J.					P		HOLOTYPE		Dode			http://coldb.mnhn.fr/catalognumber/mnhn/p/p02440827	9	11		2015-11-07										Province du Kouy-Tcheou : Montagne de Koa-Po (Tsin-Gay)				Plantae	Tracheophyta	Sapindales	Rutaceae	Magnoliopsida	P
PRESERVED_SPECIMEN	Euodia obtusifolia subsp. gigas Vaughan ex Coode	SUBSPECIES	MU	http://specimens.kew.org/herbarium/K000199360	K000199360	Melicope	obtusifolia	Mauritius	1928	1928-02-07	Near the Mare aux Vacoas.	Vaughan, R.E.	gigas				K		HOLOTYPE		Coode, M.J.E.			K000199360	2	7		2005-08-08	166	In dense bush.	An undershrub with flowers in panicles from the old wood. More information given.											Plantae	Tracheophyta	Sapindales	Rutaceae	Magnoliopsida	Herbarium		RUTACEAE
PRESERVED_SPECIMEN	Euonymus actinocarpus Loes.	SPECIES	CN	http://data.rbge.org.uk/herb/E00502283	E00502283	Euonymus	actinocarpus	China			Mengtze	Henry, Augustine					E			Yunnan Province				http://data.rbge.org.uk/herb/E00502283				2012-01-05	9120					4600 FT	BGBASE:555255	http://biocol.org/urn:lsid:biocol.org:col:15670						Plantae	Tracheophyta	Celastrales	Celastraceae	Magnoliopsida	E	ICBN
PRESERVED_SPECIMEN	Euonymus javanicus Bl.	SPECIES	ID	http://data.biodiversitydata.nl/naturalis/specimen/U%20%200226667	U 0226667	Euonymus	javanicus	Indonesia			Timor.	Zippelius A					L			Lesser Sunda Islands			ASIA	U 0226667																		Plantae	Tracheophyta	Celastrales	Celastraceae	Magnoliopsida	Botany	ICN	Plantae|Magnoliopsidae|Celastrales|Celastraceae
PRESERVED_SPECIMEN	Eupatorium cannabinum L.	SPECIES	BE	http://www.botanicalcollections.be/specimen/BR0000025018592	BR0000025018592	Eupatorium	cannabinum	Belgium	1882	1882-07-01	Bris, Leuze	Lochenies G.					BR	Juillet 1882						http://www.botanicalcollections.be/specimen/BR0000025018592	7			2017-08-28	S.N.								Meise Botanic Garden					Plantae	Tracheophyta	Asterales	Asteraceae	Magnoliopsida		ICBN
PRESERVED_SPECIMEN	Euphorbia hyberna L.	SPECIES	FR	http://coldb.mnhn.fr/catalognumber/mnhn/p/p00736397	P00736397	Euphorbia	hyberna	France				Allard					P							http://coldb.mnhn.fr/catalognumber/mnhn/p/p00736397				2015-09-05										Brissac				Plantae	Tracheophyta	Malpighiales	Euphorbiaceae	Magnoliopsida	P
PRESERVED_SPECIMEN	Euphorbia nutans Lag.	SPECIES	FR	http://coldb.mnhn.fr/catalognumber/mnhn/p/p00627147	P00627147	Euphorbia	nutans	France	1887	1887-09-05		Biche, B.		43.4604	3.42396	WGS84	P				World checklist Govaerts			http://coldb.mnhn.fr/catalognumber/mnhn/p/p00627147	9	5		2009-02-09			naturalisé au jardin botanique du Collège où il croît en abondance							Hérault : Pézenas				Plantae	Tracheophyta	Malpighiales	Euphorbiaceae	Magnoliopsida	P
PRESERVED_SPECIMEN	Euphorbia peplus L.	SPECIES	GB	http://specimens.kew.org/herbarium/K000914264	K000914264	Euphorbia	peplus	United Kingdom	2008	2008-04-25	Kew Gardens; North Arboretum: outside Wing A of the Herbarium, between the wall and the pavement (zone 113)	Cope, T.A.					K				Cope, T.A.			K000914264	4	25		2013-07-29	RBG 30													Plantae	Tracheophyta	Malpighiales	Euphorbiaceae	Magnoliopsida	Herbarium		EUPHORBIACEAE
PRESERVED_SPECIMEN	Euphorbiaceae	FAMILY	ID	http://data.biodiversitydata.nl/naturalis/specimen/U.1260333	U.1260333			Indonesia				Zollinger H					L			Java			ASIA	U.1260333																		Plantae	Tracheophyta	Malpighiales	Euphorbiaceae	Magnoliopsida	Botany	ICN	Plantae|Magnoliopsidae|Malpighiales|Euphorbiaceae
PRESERVED_SPECIMEN	Euphrasia nemorosa (Pers.) Wallr.	SPECIES	EE	TU257174	TU257174	Euphrasia	nemorosa	Estonia	1931	1931-08-28	Tähtvere, Tartu.	R. Soik					TU	1931-08-28			Helena Sepman	2009-03-10T00:00:00.000+0000		TU257174	8	28											Natural History Museum, University of Tartu		4			Plantae	Tracheophyta	Lamiales	Orobanchaceae	Magnoliopsida	TU		Viridiplantae; Anthophyta; Eudicotyledonae; Lamiales; Orobanchaceae; Euphrasia
PRESERVED_SPECIMEN	Euphrasia stricta var. stricta	VARIETY	EE	TU257379	TU257379	Euphrasia	stricta	Estonia	1993	1993-08-01	Rakvere linn	Marie Nelke	stricta				TU	1993-08			Helena Sepman	2009-06-15T00:00:00.000+0000		TU257379	8					habitat: Tiigi ääres kastanit			Euphrasia officinalis L. - h. silmarohi				Natural History Museum, University of Tartu		4			Plantae	Tracheophyta	Lamiales	Orobanchaceae	Magnoliopsida	TU		Viridiplantae; Anthophyta; Eudicotyledonae; Lamiales; Orobanchaceae; Euphrasia
PRESERVED_SPECIMEN	Euphrasia stricta var. tenuis (Brenner) J.Jalas	VARIETY	EE	TU270474	TU270474	Euphrasia	stricta	Estonia	1976	1976-06-27	Viljandi rajoon, Kõpu k/n, Tipu k.	Riho Kõiveer	tenuis				TU	1976-06-27			Helena Sepman	2009-03-25T00:00:00.000+0000		TU270474	6	27				habitat: teeserval					61		Natural History Museum, University of Tartu		4			Plantae	Tracheophyta	Lamiales	Orobanchaceae	Magnoliopsida	TU		Viridiplantae; Anthophyta; Eudicotyledonae; Lamiales; Orobanchaceae; Euphrasia
PRESERVED_SPECIMEN	Evolvulus rariflorus (Meisn.) Ooststr.	SPECIES	BR	http://specimens.kew.org/herbarium/K000954129	K000954129	Evolvulus	rariflorus	Brazil			Goyaz.	Glaziou, A.					K							K000954129				2013-08-23	21806	Informação não transcrita	Informação não transcrita											Plantae	Tracheophyta	Solanales	Convolvulaceae	Magnoliopsida	Herbarium		CONVOLVULACEAE
PRESERVED_SPECIMEN	Fabronia cameruniae Müll. Hal. ex Dusén	species	CM	http://id.luomus.fi/HA.H3301254	HA.H3301254	Fabronia	cameruniae	CM	1891	1891-01-26		Dusén, Per Karl Hjalmar		4.2191	8.9876	WGS84	H	26/1 91	Type	Southwest Province	Not on sheet		Africa	http://tun.fi/MY.123584	1	26	Bibundi	1382503807		På trädstammen.		1e4			H3301254	http://tun.fi/HR.189		Kamerun, Bibundi.	GX.22	4.2191 8.9876 WGS84 (10000m)	Müll. Hal. ex Dusén
PRESERVED_SPECIMEN	Fagraea ceilanica Thunb.	SPECIES	ID	http://data.biodiversitydata.nl/naturalis/specimen/L.2687835	L.2687835	Fagraea	ceilanica	Indonesia	1937	1937-09-14	[Indonesia,] Moluccas, Isl. Batjan, G. Sibela.	Unknown		-0.766667	127.516667	WGS84	L	1937/09/14		Moluccas	Leenhouts PW	1962-03-01T00:00:00.000+0000	ASIA	L.2687835	9	14																Plantae	Tracheophyta	Gentianales	Gentianaceae	Magnoliopsida	Botany	ICN	Plantae|Magnoliopsidae|Gentianales|Gentianaceae
PRESERVED_SPECIMEN	Fagraea volubilis Wall.	SPECIES	MY	http://data.rbge.org.uk/herb/E00438256	E00438256	Utania	volubilis	Malaysia	1895	1895-04-20	Miri River	Hose, Charles					E	1895-04-20	ISOTYPE					http://data.rbge.org.uk/herb/E00438256	4	20		2010-03-18	742						BGBASE:425425	http://biocol.org/urn:lsid:biocol.org:col:15670						Plantae	Tracheophyta	Gentianales	Gentianaceae	Magnoliopsida	E	ICBN
PRESERVED_SPECIMEN	Faramea sessifolia P.H.Allen	SPECIES	GY	http://coldb.mnhn.fr/catalognumber/mnhn/p/p03907637	P03907637	Faramea	sessifolia	Guyana	1846	1846-01-01		Schomburgk					P							http://coldb.mnhn.fr/catalognumber/mnhn/p/p03907637	1	1		2015-09-04														Plantae	Tracheophyta	Gentianales	Rubiaceae	Magnoliopsida	P
PRESERVED_SPECIMEN	Felicia Cass.	GENUS	GB	http://specimens.kew.org/herbarium/K000914449	K000914449	Felicia		United Kingdom	2011	2011-09-29	Kew Gardens; North Arboretum	Cope, T.A.		51.48	-0.31	WGS84	K				Cope, T.A.			K000914449	9	29		2014-03-18	RBG 537	in an abandoned flowerbed near the Palm House (zone 183, OS monad 18.76)												Plantae	Tracheophyta	Asterales	Asteraceae	Magnoliopsida	Herbarium		COMPOSITAE
PRESERVED_SPECIMEN	Ficinia indica H.Pfeiff.	SPECIES	none	http://coldb.mnhn.fr/catalognumber/mnhn/p/p01835357	P01835357	Ficinia	indica										P							http://coldb.mnhn.fr/catalognumber/mnhn/p/p01835357				2015-09-03														Plantae	Tracheophyta	Poales	Cyperaceae	Liliopsida	P
PRESERVED_SPECIMEN	Ficus eximia Schott	SPECIES	BR	http://specimens.kew.org/herbarium/K000946331	K000946331	Ficus	eximia	Brazil	1964	1964-03-31	Guanabara, Botafogo, Mourisco.	Carauta, J.P.P.					K				Pelissari, G.; Romaniuc Neto, S.	2013-06-05T00:00:00.000+0000		K000946331	3	31		2013-09-01	215													Plantae	Tracheophyta	Rosales	Moraceae	Magnoliopsida	Herbarium		MORACEAE
PRESERVED_SPECIMEN	Ficus floresana C.C.Berg	SPECIES	ID	http://data.biodiversitydata.nl/naturalis/specimen/L%20%200491067	L 0491067	Ficus	floresana	Indonesia	1965	1965-05-04		Verheijen JAJ					L	1965/05/04	TYPE	Lesser Sunda Islands	Berg CC		ASIA	L 0491067	5	4																Plantae	Tracheophyta	Rosales	Moraceae	Magnoliopsida	Botany	ICN	Plantae|Magnoliopsidae|Rosales|Moraceae
PRESERVED_SPECIMEN	Ficus natalensis subsp. leprieurii (Miq.) C.C.Berg	SUBSPECIES	SN	http://data.biodiversitydata.nl/naturalis/specimen/L.3973145	L.3973145	Ficus	natalensis	Senegal			Senegal.	Leprieur FMR	leprieurii				L		ISOTYPE		Berg CC	2006-02-08T00:00:00.000+0000	AFRICA	L.3973145																		Plantae	Tracheophyta	Rosales	Moraceae	Magnoliopsida	Botany	ICN	Plantae|Magnoliopsidae|Rosales|Moraceae
PRESERVED_SPECIMEN	Ficus riedelii Teijsm. ex Miq.	SPECIES	ID	http://data.biodiversitydata.nl/naturalis/specimen/L.1620333	L.1620333	Ficus	riedelii	Indonesia	1994	1994-12-11	South Sulawesi, Malili, off km 13 east of Malili, road to Saroako.	Sidiyasa K					L	1994/12/11		Sulawesi	Berg CC	2012-03-27T00:00:00.000+0000	ASIA	L.1620333	12	11																Plantae	Tracheophyta	Rosales	Moraceae	Magnoliopsida	Botany	ICN	Plantae|Magnoliopsidae|Rosales|Moraceae
PRESERVED_SPECIMEN	Ficus sagittata Vahl	SPECIES	ID	http://data.biodiversitydata.nl/naturalis/specimen/L.1616068	L.1616068	Ficus	sagittata	Indonesia	1985	1985-03-09	Celebes. G. Gindopo, Basidondo, Toli-Toli.	Ramlanto; Fanani Z					L	1985/03/09		Sulawesi			ASIA	L.1616068	3	9																Plantae	Tracheophyta	Rosales	Moraceae	Magnoliopsida	Botany	ICN	Plantae|Magnoliopsidae|Rosales|Moraceae
PRESERVED_SPECIMEN	Ficus saxophila Blume	SPECIES	ID	http://data.biodiversitydata.nl/naturalis/specimen/U.1424359	U.1424359	Ficus	saxophila	Indonesia			Timor	Unknown					L	1925/10/31 | 1925/10/01		Lesser Sunda Islands	Beumée JGB		ASIA	U.1424359																		Plantae	Tracheophyta	Rosales	Moraceae	Magnoliopsida	Botany	ICN	Plantae|Magnoliopsidae|Rosales|Moraceae
PRESERVED_SPECIMEN	Ficus trichoclada Baker	SPECIES	MG	http://coldb.mnhn.fr/catalognumber/mnhn/p/p00109897	P00109897	Ficus	trichoclada	Madagascar				Baron, R.					P		ISOTYPE		Berg			http://coldb.mnhn.fr/catalognumber/mnhn/p/p00109897				2015-09-18										Central				Plantae	Tracheophyta	Rosales	Moraceae	Magnoliopsida	P
PRESERVED_SPECIMEN	Flowering plant	SPECIES	GB	1575fb0f-8fba-4b11-b6fd-a8e3cefadb81	BM000625363		plant	United Kingdom	1920	1920-07-21		Anon.		54.727392	-1.691519	WGS84	BM			England			EUROPE	4755844	7	21		2017-10-19	1065						NHMUK:ecatalogue:4755844							Plantae	Tracheophyta	Piperales	Piperaceae	Magnoliopsida	BOT		Monocotyledones; Orchidaceae
PRESERVED_SPECIMEN	Flowering plant	SPECIES	GB	28c6c0e9-871b-411f-9c54-18925ff60c9a	BM000644348		plant	United Kingdom	1888	1888-07-01		Anon.		52.658546	1.299665	WGS84	BM			England			EUROPE	4781234	7				1327						NHMUK:ecatalogue:4781234							Plantae	Tracheophyta	Piperales	Piperaceae	Magnoliopsida	BOT		Orchidaceae
PRESERVED_SPECIMEN	Flowering plant	SPECIES	GB	77f31169-9ff7-48de-bd8b-d862ed1e7434	BM000625345		plant	United Kingdom	1930	1930-06-11		Thomas Jackson Foggitt		53.995072	-1.798562	WGS84	BM			England			EUROPE	4755771	6	11		2017-10-13	1470						NHMUK:ecatalogue:4755771							Plantae	Tracheophyta	Piperales	Piperaceae	Magnoliopsida	BOT		Monocotyledones; Orchidaceae
PRESERVED_SPECIMEN	Flowering plant	SPECIES	GB	fcb70dbb-462c-42a2-a071-47ccb94803a5	BM000782325		plant	United Kingdom	1950	1950-01-01		Person String; J Whittaker		51.548322	-0.271231	WGS84	BM			England			EUROPE	4830152				2017-04-12	278A						NHMUK:ecatalogue:4830152							Plantae	Tracheophyta	Piperales	Piperaceae	Magnoliopsida	BOT		Dicotyledones; Fabaceae: faboideae
PRESERVED_SPECIMEN	Flowering plant	SPECIES	GB	ff7ad3d8-b071-4ee6-9a29-fa83026338fe	BM000782322		plant	United Kingdom	1950	1950-07-01		J Whittaker		51.548322	-0.271231	WGS84	BM			England			EUROPE	4830147	7			2017-10-17	108						NHMUK:ecatalogue:4830147							Plantae	Tracheophyta	Piperales	Piperaceae	Magnoliopsida	BOT		Dicotyledones; Fabaceae: faboideae
PRESERVED_SPECIMEN	Forsteronia rufa Müll.Arg.	SPECIES	none	http://coldb.mnhn.fr/catalognumber/mnhn/p/p03887147	P03887147	Forsteronia	rufa										P							http://coldb.mnhn.fr/catalognumber/mnhn/p/p03887147				2015-09-04														Plantae	Tracheophyta	Gentianales	Apocynaceae	Magnoliopsida	P
PRESERVED_SPECIMEN	Fosbergia shweliensis (J.Anthony) Tirveng. & Sastre	SPECIES	CN	http://data.rbge.org.uk/herb/E00263609	E00263609	Fosbergia	shweliensis	China	2005	2005-05-26	Vicinity of Lihuipo, along the Damatang river, W side of Gaoligong Shan.	Gaoligong Shan Biotic Survey Expedition - Summer 2005		24.825278	98.766389	WGS84	E	2005-05-26		Yunnan				http://data.rbge.org.uk/herb/E00263609	5	26	Longling	2007-11-12	24924					2190 M	BGBASE:273321	http://biocol.org/urn:lsid:biocol.org:col:15670						Plantae	Tracheophyta	Gentianales	Rubiaceae	Magnoliopsida	E	ICBN
PRESERVED_SPECIMEN	Fragaria vesca L.	SPECIES	BE	http://www.botanicalcollections.be/specimen/BR0000025756586V	BR0000025756586V	Fragaria	vesca	Belgium			Antwerpen	Studenten 2e Kandidatuur 1978-1979					BR							http://www.botanicalcollections.be/specimen/BR0000025756586V				2017-03-27	I/108								Meise Botanic Garden					Plantae	Tracheophyta	Rosales	Rosaceae	Magnoliopsida		ICBN
PRESERVED_SPECIMEN	Fraxinus excelsior L.	SPECIES	GB	http://specimens.kew.org/herbarium/K000914636	K000914636	Fraxinus	excelsior	United Kingdom	2015	2015-08-20	Kew Gardens; Thames Bank: towpath south of Brentford Gate ('The Strip') (zone STR)	Cope, T.A.					K				Cope, T.A.			K000914636	8	20		2016-01-14	RBG 588													Plantae	Tracheophyta	Lamiales	Oleaceae	Magnoliopsida	Herbarium		OLEACEAE
PRESERVED_SPECIMEN	Fraxinus platycarpa Michx.	SPECIES	US	http://www.botanicalcollections.be/specimen/BR0000005579808	BR0000005579808	Fraxinus	platycarpa	United States	1833	1833-06-10	Missouri	Wied M.					BR							http://www.botanicalcollections.be/specimen/BR0000005579808	6	10		2011-02-03	S.N.								Meise Botanic Garden					Plantae	Tracheophyta	Lamiales	Oleaceae	Magnoliopsida		ICBN
PRESERVED_SPECIMEN	Froelichia humboldtiana Seub.	SPECIES	BR	http://specimens.kew.org/herbarium/K001209032	K001209032	Froelichia	humboldtiana	Brazil	1992	1992-02-20	Dunas de Itapuã e Lagoa de Abaeté.	Guedes, L.M.; Hind, D.J.N.					K							K001209032	2	20		2015-12-16	72													Plantae	Tracheophyta	Caryophyllales	Amaranthaceae	Magnoliopsida	Herbarium		AMARANTHACEAE
PRESERVED_SPECIMEN	Frullania holokelensis Verd.	SPECIES	US	http://coldb.mnhn.fr/catalognumber/mnhn/pc/pc0103417	PC0103417	Frullania	holokelensis	United States	1910	1910-08-01		Faurie, U.J.					P							http://coldb.mnhn.fr/catalognumber/mnhn/pc/pc0103417	8			2015-09-30										Iles Sandwich : insula Maui, Haleakala				Plantae	Marchantiophyta	Porellales	Frullaniaceae	Jungermanniopsida	PC
PRESERVED_SPECIMEN	Fumaria boraei Jord.	SPECIES	GB	http://specimens.kew.org/herbarium/K000653715	K000653715	Fumaria	boraei	United Kingdom	1902	1902-09-16	Llanfairfechan, Caernarvon	Pugsley, H.W.					K							K000653715	9	16		2010-01-21	227													Plantae	Tracheophyta	Ranunculales	Papaveraceae	Magnoliopsida	Herbarium		PAPAVERACEAE
PRESERVED_SPECIMEN	Galactia crassifolia Taub.	SPECIES	BR	http://specimens.kew.org/herbarium/K000930539	K000930539	Galactia	crassifolia	Brazil	1968	1968-05-03	Fazenda Água Limpa, 25km SSE Brasília.	Onishi, E.; Philcox, D.					K				Lewis, G.P.	1978-12-04T00:00:00.000+0000		K000930539	5	3		2013-07-23	4883													Plantae	Tracheophyta	Fabales	Fabaceae	Magnoliopsida	Herbarium		LEGUMINOSAE-PAPILIONOIDEAE
PRESERVED_SPECIMEN	Galatella linosyris Rchb.f.	SPECIES	BE	http://www.botanicalcollections.be/specimen/BR0000024516112	BR0000024516112	Galatella	linosyris	Belgium	1954	1954-05-01	Romedenne	Delvosalle L.					BR							http://www.botanicalcollections.be/specimen/BR0000024516112	5			2017-11-08	1978B								Meise Botanic Garden					Plantae	Tracheophyta	Asterales	Asteraceae	Magnoliopsida		ICBN
PRESERVED_SPECIMEN	Galeopsis ladanum L.	SPECIES	EE	TU261725	TU261725	Galeopsis	ladanum	Estonia	1934	1934-07-22	Värska	N. Entson					TU	1934-07-22			N. Entson	1934-07-22T00:00:00.000+0000		TU261725	7	22				habitat: põld							Natural History Museum, University of Tartu		4			Plantae	Tracheophyta	Lamiales	Lamiaceae	Magnoliopsida	TU		Viridiplantae; Anthophyta; Eudicotyledonae; Lamiales; Lamiaceae; Galeopsis
PRESERVED_SPECIMEN	Galeopsis speciosa Mill. f. purpurea	Forma	FI	http://id.luomus.fi/HA.H0016095	HA.H0016095	Galeopsis	speciosa	FI	1888	1888-08-10	Vehmersalmi	Buddén, E. J.	purpurea			WGS84	H	10 VIII 1888	Type		Harald Lindberg	9.10.1910	Europe	http://tun.fi/MY.99326	8	10	Kuopio	1382503547				1e5	Lectoparatype		H0016095	http://tun.fi/HR.129	Luomus	På en åker i Vehmersalmi (Kuopio) [In a field in Vehmersalmi (Kuopio)].	GX.22	62.7607, 28.0293	Mill.
PRESERVED_SPECIMEN	Galium asprellum Michx.	SPECIES	CA	http://www.botanicalcollections.be/specimen/BR0000005639113	BR0000005639113	Galium	asprellum	Canada	1842	1842-08-05	East Mill [Medet]	Maclagan P.W.					BR							http://www.botanicalcollections.be/specimen/BR0000005639113	8	5		2011-06-21	S.N.								Meise Botanic Garden					Plantae	Tracheophyta	Gentianales	Rubiaceae	Magnoliopsida		ICBN
PRESERVED_SPECIMEN	Galium asprellum Michx.	SPECIES	US	http://www.botanicalcollections.be/specimen/BR0000005619801	BR0000005619801	Galium	asprellum	United States			Pensylvania	von Schweinitz L.D.					BR	S.D.						http://www.botanicalcollections.be/specimen/BR0000005619801				2011-06-21	S.N.								Meise Botanic Garden					Plantae	Tracheophyta	Gentianales	Rubiaceae	Magnoliopsida		ICBN
PRESERVED_SPECIMEN	Galium boreale L.	SPECIES	EE	TU271596	TU271596	Galium	boreale	Estonia	1991	1991-06-26	Vormsi, Disby ps. tipus oleval	M. Aunapuu					TU	1991-06-26			M. Aunapuu	1991-06-26T00:00:00.000+0000		TU271596	6	26				habitat: rannaniidul							Natural History Museum, University of Tartu		4			Plantae	Tracheophyta	Gentianales	Rubiaceae	Magnoliopsida	TU		Viridiplantae; Anthophyta; Eudicotyledonae; Gentianales; Rubiaceae; Galium
PRESERVED_SPECIMEN	Galium circaezans Michx.	SPECIES	US	http://www.botanicalcollections.be/specimen/BR0000005619498	BR0000005619498	Galium	circaezans	United States			White Plains	Clark H.T.					BR	S.D.						http://www.botanicalcollections.be/specimen/BR0000005619498				2011-06-21	S.N.								Meise Botanic Garden					Plantae	Tracheophyta	Gentianales	Rubiaceae	Magnoliopsida		ICBN
PRESERVED_SPECIMEN	Galium L.	GENUS	AU	http://www.botanicalcollections.be/specimen/BR0000005618798	BR0000005618798	Galium		Australia			Van Diemensland	Gunn R.C.					BR	S.D.						http://www.botanicalcollections.be/specimen/BR0000005618798				2011-07-12	S.N.								Meise Botanic Garden					Plantae	Tracheophyta	Gentianales	Rubiaceae	Magnoliopsida		ICBN
PRESERVED_SPECIMEN	Galium pilosum Ait.	SPECIES	US	http://www.botanicalcollections.be/specimen/BR0000005620029	BR0000005620029	Galium	pilosum	United States			Pensylvania	von Schweinitz L.D.					BR	S.D.						http://www.botanicalcollections.be/specimen/BR0000005620029				2011-06-23	S.N.								Meise Botanic Garden					Plantae	Tracheophyta	Gentianales	Rubiaceae	Magnoliopsida		ICBN
PRESERVED_SPECIMEN	Galium serpylloides Royle	SPECIES	NP	dbcfda0f-3701-4c6f-8099-669fd91b6c97	BM000521903	Galium	serpylloides	Nepal	1954	1954-08-20		J.E.Michael Arnold		28.253008	83.938548	WGS84	BM		HOLOTYPE		Friedrich Ehrendorfer		ASIA	468674	8	20			124						NHMUK:ecatalogue:468674							Plantae	Tracheophyta	Gentianales	Rubiaceae	Magnoliopsida	BOT		Rubiaceae
PRESERVED_SPECIMEN	Galium trifidum L.	SPECIES	US	http://www.botanicalcollections.be/specimen/BR0000005618361	BR0000005618361	Galium	trifidum	United States			Pensylvania	von Schweinitz L.D.					BR	S.D.						http://www.botanicalcollections.be/specimen/BR0000005618361				2011-07-11	S.N.								Meise Botanic Garden					Plantae	Tracheophyta	Gentianales	Rubiaceae	Magnoliopsida		ICBN
PRESERVED_SPECIMEN	Galium trilobum Colenso	SPECIES	NZ	http://www.botanicalcollections.be/specimen/BR0000005618026	BR0000005618026	Galium	trilobum	New Zealand			S.L.	Haast J.					BR	S.D.						http://www.botanicalcollections.be/specimen/BR0000005618026				2011-07-11	254								Meise Botanic Garden					Plantae	Tracheophyta	Gentianales	Rubiaceae	Magnoliopsida		ICBN
PRESERVED_SPECIMEN	Galium verum L.	SPECIES	BE	http://www.botanicalcollections.be/specimen/BR0000025709902V	BR0000025709902V	Galium	verum	Belgium	1979	1979-08-01	Nismes	Studenten 2e Kandidatuur					BR							http://www.botanicalcollections.be/specimen/BR0000025709902V	8	1		2017-07-10	II/14								Meise Botanic Garden					Plantae	Tracheophyta	Gentianales	Rubiaceae	Magnoliopsida		ICBN
PRESERVED_SPECIMEN	Garcinia dulcis (Roxb.) Kurz	SPECIES	ID	http://data.biodiversitydata.nl/naturalis/specimen/L.2403211	L.2403211	Garcinia	dulcis	Indonesia	1938	1938-05-30	Archipel. Ind.: Molukken, Aroe-eilanden, Dosinamalaoe, P.Kobroor.	Unknown					L	1938/05/30		Moluccas			ASIA	L.2403211	5	30																Plantae	Tracheophyta	Malpighiales	Clusiaceae	Magnoliopsida	Botany	ICN	Plantae|Magnoliopsidae|Malpighiales|Guttiferae
PRESERVED_SPECIMEN	Garcinia nervosa Miq.	SPECIES	ID	http://data.biodiversitydata.nl/naturalis/specimen/U.1199431	U.1199431	Garcinia	nervosa	Indonesia	1918	1918-12-26	Archipel. Ind. Eil. Simaloer bij Sumatra.	Achmad					L	1918/12/26					ASIA	U.1199431	12	26																Plantae	Tracheophyta	Malpighiales	Clusiaceae	Magnoliopsida	Botany	ICN	Plantae|Magnoliopsidae|Malpighiales|Guttiferae
PRESERVED_SPECIMEN	Gastonia serratifolia (Miq.) Philipson	SPECIES	ID	http://data.biodiversitydata.nl/naturalis/specimen/L.2567331	L.2567331	Polyscias	serratifolia	Indonesia	1967	1967-08-01	Kl. Soenda Eil. Flores, West-; Todong kope.	Schmutz E					L	1967/08/01		Lesser Sunda Islands			ASIA	L.2567331	8	1																Plantae	Tracheophyta	Apiales	Araliaceae	Magnoliopsida	Botany	ICN	Plantae|Magnoliopsidae|Apiales|Araliaceae
PRESERVED_SPECIMEN	Gastrolobium polystachyum Meisn.	SPECIES	AU	http://coldb.mnhn.fr/catalognumber/mnhn/p/p03570207	P03570207	Gastrolobium	polystachyum	Australia	1848	1848-01-01		Drummond, J.R.					P		TYPE					http://coldb.mnhn.fr/catalognumber/mnhn/p/p03570207				2015-10-17										W. australia				Plantae	Tracheophyta	Fabales	Fabaceae	Magnoliopsida	P
PRESERVED_SPECIMEN	Gaultheria nummularioides G.Don	SPECIES	ID	http://data.biodiversitydata.nl/naturalis/specimen/L.2604218	L.2604218	Gaultheria	nummularioides	Indonesia	1925	1925-06-14	Java, Tenger Geb., Penandjaän	Jeswiet J					L	1925/06/14		Java			ASIA	L.2604218	6	14																Plantae	Tracheophyta	Ericales	Ericaceae	Magnoliopsida	Botany	ICN	Plantae|Magnoliopsidae|Ericales|Ericaceae
PRESERVED_SPECIMEN	Gaultheria trichophylla var. eciliata S.J.Rae & D.G.Long	VARIETY	BT	e9cdf43b-dec0-449b-bf95-85deaec93838	BM001122162	Gaultheria	trichophylla	Bhutan	1949	1949-07-09	Monggar; Nearest Named Place: Pung La	F. Ludlow, G. Sherriff & J.H. Hicks	eciliata	27.68	91.2	WGS84	BM		HOLOTYPE	Lhuentse	Peter Warren Fritsch		ASIA	2868776	7	9			20904	In moss or peaty soil on rocks.					NHMUK:ecatalogue:2868776							Plantae	Tracheophyta	Ericales	Ericaceae	Magnoliopsida	BOT		Ericaceae
PRESERVED_SPECIMEN	Genista tinctoria L.	SPECIES	EE	TU301319	TU301319	Genista	tinctoria	Estonia	1936	1936-07-22	Viru, Sagadi metskond	A. Taim					TU	1936-07-22			A. Taim	1936-07-22T00:00:00.000+0000		TU301319	7	22											Natural History Museum, University of Tartu		4			Plantae	Tracheophyta	Fabales	Fabaceae	Magnoliopsida	TU		Viridiplantae; Anthophyta; Eudicotyledonae; Fabales; Fabaceae; Genista
PRESERVED_SPECIMEN	Gentiana punctata L.	SPECIES	FR	http://coldb.mnhn.fr/catalognumber/mnhn/p/p04007967	P04007967	Gentiana	punctata	France	1905	1905-08-04		Martin-Lormelet, M.		45.06412	6.40782	WGS84	P			Provence-Alpes-Côte-d'Azur				http://coldb.mnhn.fr/catalognumber/mnhn/p/p04007967	8	4		2015-09-04										Col du Galibier				Plantae	Tracheophyta	Gentianales	Gentianaceae	Magnoliopsida	P
PRESERVED_SPECIMEN	Gentiana rostanii Reuter ex Verlot	SPECIES	FR	http://coldb.mnhn.fr/catalognumber/mnhn/p/p03995667	P03995667	Gentiana	rostanii	France	1862	1862-07-15		Burle		44.3863	6.65046	WGS84	P			Provence-Alpes-Côte-d'Azur				http://coldb.mnhn.fr/catalognumber/mnhn/p/p03995667	7	15		2015-09-04										Env de Barcelonnette Bses-Alpes				Plantae	Tracheophyta	Gentianales	Gentianaceae	Magnoliopsida	P
PRESERVED_SPECIMEN	Gentianella campestris (L.) Börner	SPECIES	GB	http://specimens.kew.org/herbarium/K000773177	K000773177	Gentianella	campestris	United Kingdom	1886	1886-09-08	Downs near Brighton.	Crosfield, A.J.					K							K000773177	9	8		2011-10-10	s.n.													Plantae	Tracheophyta	Gentianales	Gentianaceae	Magnoliopsida	Herbarium		GENTIANACEAE
PRESERVED_SPECIMEN	Geranium cristatum Steven	species	AZ	http://id.luomus.fi/HA.H1366864	HA.H1366864	Geranium	cristatum	AZ	1997	1997-01-01/1997-12-31	Jucharibasch [Yukhari-bash].	Steven, C.					H		Isolectotype		C. Aedo	1997		http://tun.fi/MY.105702				1382503588							H1366864	http://tun.fi/HR.129	Luomus		GX.22		Steven
PRESERVED_SPECIMEN	Geranium refractum Edgew. & Hook.f.	SPECIES	CN	http://data.rbge.org.uk/herb/E00216887	E00216887	Geranium	refractum	China	1932			Rock, J.F.					E	October 1932						http://data.rbge.org.uk/herb/E00216887				2007-12-04	24486						BGBASE:226208	http://biocol.org/urn:lsid:biocol.org:col:15670						Plantae	Tracheophyta	Geraniales	Geraniaceae	Magnoliopsida	E	ICBN
PRESERVED_SPECIMEN	Gerbera piloselloides (L.) Cass.	SPECIES	ET	http://data.biodiversitydata.nl/naturalis/specimen/L%20%200001958	L 0001958	Piloselloides	piloselloides	Ethiopia	1837	1837-06-11	AbyssinicumMt. Scholoda	Schimper GHW		14.183333	38.9	WGS84	L	1837/06/11	ISOTYPE	Tigray	Hansen HV		AFRICA	L 0001958	6	11																Plantae	Tracheophyta	Asterales	Asteraceae	Magnoliopsida	Botany	ICN	Plantae|Magnoliopsidae|Asterales|Compositae
PRESERVED_SPECIMEN	Gigantochloa holttumiana K.M.Wong	SPECIES	MY	http://specimens.kew.org/herbarium/K000290816	K000290816	Gigantochloa	holttumiana	Malaysia	1981	1981-08-26	Peninsular Malaysia, Pahang, Fraser Hill, by path to the Forest Department's Big Tree Plot	Wong, K.M.					K		ISOTYPE					K000290816	8	26		2004-01-14	FRI 32245	on hill-slope												Plantae	Tracheophyta	Poales	Poaceae	Liliopsida	Herbarium		POACEAE
PRESERVED_SPECIMEN	Glandularia peruviana (L.) Small	SPECIES	US	http://www.botanicalcollections.be/specimen/BR0000013220945	BR0000013220945	Glandularia	peruviana	United States			S.L.	Engelmann G.					BR	S.D.						http://www.botanicalcollections.be/specimen/BR0000013220945				2014-06-12	S.N.								Meise Botanic Garden					Plantae	Tracheophyta	Lamiales	Verbenaceae	Magnoliopsida		ICBN
PRESERVED_SPECIMEN	Glebionis segetum Fourr.	SPECIES	GB	http://specimens.kew.org/herbarium/K000790557	K000790557	Glebionis	segetum	United Kingdom	1933	1933-07-20		Hubbard, C.E.					K							K000790557	7	20		2012-03-28	9094													Plantae	Tracheophyta	Asterales	Asteraceae	Magnoliopsida	Herbarium		COMPOSITAE
PRESERVED_SPECIMEN	Glebionis segetum Fourr.	SPECIES	GB	http://specimens.kew.org/herbarium/K000790598	K000790598	Glebionis	segetum	United Kingdom	1958	1958-06-10		Robinson, E.					K							K000790598	6	10		2012-03-28	s.n.													Plantae	Tracheophyta	Asterales	Asteraceae	Magnoliopsida	Herbarium		COMPOSITAE
PRESERVED_SPECIMEN	Glechoma hederacea L.	SPECIES	NL	http://data.biodiversitydata.nl/naturalis/specimen/WAG.1717967	WAG.1717967	Glechoma	hederacea	Netherlands	1900	1900-05-16	Wageningen, Bergrand.	Giltay E					L	1900/05/16					EUROPE	WAG.1717967	5	16																Plantae	Tracheophyta	Lamiales	Lamiaceae	Magnoliopsida	Botany	ICN	Plantae|Magnoliopsidae|Lamiales|Labiatae
PRESERVED_SPECIMEN	Glinus lotoides L.	SPECIES	none	http://coldb.mnhn.fr/catalognumber/mnhn/p/p04600127	P04600127	Glinus	lotoides										P							http://coldb.mnhn.fr/catalognumber/mnhn/p/p04600127				2015-09-04														Plantae	Tracheophyta	Caryophyllales	Molluginaceae	Magnoliopsida	P
PRESERVED_SPECIMEN	Globba racemosa Sm.	SPECIES	CN	http://data.rbge.org.uk/herb/E00643266	E00643266	Globba	racemosa	China	2002	2002-10-10	Vicinity of Shigu SW of Gongshan along the road to Danzhu, W side of the Nu Jiang. E side of Gaoligong Shan. SW facing 30-60 degree slope.	Gaoligong Shan Biotic Survey Expedition - Autumn 2002		27.702778	98.696111	WGS84	E	2002-10-10		Yunnan				http://data.rbge.org.uk/herb/E00643266	10	10	Gongshan	2013-08-19	15922					1620 M	BGBASE:670202	http://biocol.org/urn:lsid:biocol.org:col:15670						Plantae	Tracheophyta	Zingiberales	Zingiberaceae	Liliopsida	E	ICBN
PRESERVED_SPECIMEN	Gloeotrichia natans Rabenh. ex Bornet & Flahault	SPECIES	none	http://coldb.mnhn.fr/catalognumber/mnhn/pc/pc0563957	PC0563957	Gloeotrichia	natans										P							http://coldb.mnhn.fr/catalognumber/mnhn/pc/pc0563957				2015-09-03														Bacteria	Cyanobacteria	Nostocales	Rivulariaceae	Cyanophyceae	PC
PRESERVED_SPECIMEN	Glycosmis chlorosperma var. elmeri (Merr.) Tanaka	VARIETY	ID	http://data.biodiversitydata.nl/naturalis/specimen/L.2116756	L.2116756	Glycosmis	chlorosperma	Indonesia	1963	1963-11-15	Berau. Tdg. Redeb. East Borneo	Kostermans AJGH	elmeri				L	1963/11/15		Borneo	Stone BC	1981-04-07T00:00:00.000+0000	ASIA	L.2116756	11	15																Plantae	Tracheophyta	Sapindales	Rutaceae	Magnoliopsida	Botany	ICN	Plantae|Magnoliopsidae|Sapindales|Rutaceae
PRESERVED_SPECIMEN	Glyphochloa acuminata (Hack.) Clayton	SPECIES	IN	http://data.biodiversitydata.nl/naturalis/specimen/L%20%200044478	L 0044478	Glyphochloa	acuminata	India			Ind. Or.Maisor & Carnatic	Thomson G					L		ISOTYPE	Karnataka	Veldkamp JF	1981-11-01T00:00:00.000+0000	ASIA	L 0044478																		Plantae	Tracheophyta	Poales	Poaceae	Liliopsida	Botany	ICN	Plantae|Magnoliopsidae|Poales|Gramineae
PRESERVED_SPECIMEN	Gnetum hainanense C.Y.Cheng ex L.K.Fu, Y.F.Yu & M.G.Gilbert	SPECIES	CN	http://data.rbge.org.uk/herb/E00127288	E00127288	Gnetum	hainanense	China	1934	1934-02-22		Liang, H.Y.					E	1934-02-22		Hainan				http://data.rbge.org.uk/herb/E00127288	2	22		2015-06-23	65151						BGBASE:136560	http://biocol.org/urn:lsid:biocol.org:col:15670						Plantae	Tracheophyta	Gnetales	Gnetaceae	Gnetopsida	E	ICBN
PRESERVED_SPECIMEN	Gomphrena celosioides C.F.P.Mart.	SPECIES	BR	http://specimens.kew.org/herbarium/K001207771	K001207771	Gomphrena	celosioides	Brazil	1950	1950-03-17	Estación Guianuba.	Rambo, B.					K							K001207771	3	17		2015-12-16	40571													Plantae	Tracheophyta	Caryophyllales	Amaranthaceae	Magnoliopsida	Herbarium		AMARANTHACEAE
PRESERVED_SPECIMEN	Goniopteris poiteana	species	BR	http://id.luomus.fi/H.1067278	H.1067278	Goniopteris	poiteana	Brazil				Salzmann, P.					H						Central America, South America and the Antarctic	http://tun.fi/MY.744388				1492084432							H1067278	http://tun.fi/HR.168	Luomus, University of Eastern Finland		GX.270
PRESERVED_SPECIMEN	Gonocaryum crassifolium Ridl.	SPECIES	ID	http://data.biodiversitydata.nl/naturalis/specimen/L.2291420	L.2291420	Gonocaryum	crassifolium	Indonesia	1982	1982-11-26	Indonesia, Kalimantan Tengah, Bukit Raya	Nooteboom HP		-0.75	112.75	WGS84	L	1982/11/26		Borneo			ASIA	L.2291420	11	26																Plantae	Tracheophyta	Aquifoliales	Cardiopteridaceae	Magnoliopsida	Botany	ICN	Plantae|Magnoliopsidae|Aquifoliales|Cardiopteridaceae
PRESERVED_SPECIMEN	Gossypium L.	GENUS	US	http://www.botanicalcollections.be/specimen/BR0000013465728	BR0000013465728	Gossypium		United States			Owahoo	Bennett					BR	S.D.						http://www.botanicalcollections.be/specimen/BR0000013465728				2013-04-15	S.N.								Meise Botanic Garden					Plantae	Tracheophyta	Malvales	Malvaceae	Magnoliopsida		ICBN
PRESERVED_SPECIMEN	Grazielia nummularia (Hook. & Arn.) R.M.King & H.Rob.	SPECIES	BR	http://specimens.kew.org/herbarium/K000941566	K000941566	Grazielia	nummularia	Brazil				Richter, E.					K				Nakajima, J.N.			K000941566				2013-08-05	s.n.													Plantae	Tracheophyta	Asterales	Asteraceae	Magnoliopsida	Herbarium		COMPOSITAE
PRESERVED_SPECIMEN	Grevillea didymobotrya Meisn.	SPECIES	AU	ffb25e8a-c5ce-415d-9a7e-e86867494281	BM001121153	Grevillea	didymobotrya	Australia	1901	1901-10-01	Coolgardie District	Ernst Georg Pritzel		-30.95205	121.165711	WGS84	BM			Western Australia			OCEANIA	6512141	10				866						NHMUK:ecatalogue:6512141							Plantae	Tracheophyta	Proteales	Proteaceae	Magnoliopsida	BOT		Proteaceae
PRESERVED_SPECIMEN	Grevillea trifida Meisn.	SPECIES	AU	http://data.rbge.org.uk/herb/E00675821	E00675821	Grevillea	trifida	Australia	1802	1802-01-01	K.G.III. S. [King George's 3rd Sound]	Brown, Robert					E	1802	ISOLECTOTYPE	Western Australia				http://data.rbge.org.uk/herb/E00675821				2014-05-01							BGBASE:691332	http://biocol.org/urn:lsid:biocol.org:col:15670						Plantae	Tracheophyta	Proteales	Proteaceae	Magnoliopsida	E	ICBN
PRESERVED_SPECIMEN	Groenlandia densa Fourr.	SPECIES	GB	http://specimens.kew.org/herbarium/K000773624	K000773624	Groenlandia	densa	United Kingdom	1877	1877-06-23	Rhines (ditches in moor)	Waterfall, W.B.					K							K000773624	6	23		2012-03-28	1232	Rhines (ditches in moor)												Plantae	Tracheophyta	Alismatales	Potamogetonaceae	Liliopsida	Herbarium		POTAMOGETONACEAE
PRESERVED_SPECIMEN	Guatteria punctata (Aubl.) R.A.Howard	SPECIES	BR	http://specimens.kew.org/herbarium/K000487165	K000487165	Guatteria	punctata	Brazil			Barra	Spruce, R.					K				Maas, P.J.M.			K000487165				2016-05-04	1342	forest	Tree, 30 ft x 15 in, very bushy; branches subfastigiate Petals brown, green near base. Stamen ochre. Pistils green.											Plantae	Tracheophyta	Magnoliales	Annonaceae	Magnoliopsida	Herbarium		ANNONACEAE
PRESERVED_SPECIMEN	Guatteria richardii R.E.Fr.	SPECIES	GF	http://www.botanicalcollections.be/specimen/BR0000006955854	BR0000006955854	Guatteria	richardii	French Guiana	1984	1984-01-13	Montagnes de la Trinité. Sommet nord	de Granville J.J., Berg C.C., Jansen-Jacobs M. & Van Setten J.					BR		ISOTYPE					http://www.botanicalcollections.be/specimen/BR0000006955854	1	13		2008-11-17	5947								Meise Botanic Garden					Plantae	Tracheophyta	Magnoliales	Annonaceae	Magnoliopsida		ICBN
PRESERVED_SPECIMEN	Guazuma ulmifolia Lam.	SPECIES	BR	http://www.botanicalcollections.be/specimen/BR0000013523718	BR0000013523718	Guazuma	ulmifolia	Brazil	1883	1883-01-01	S.L.	Glaziou A.					BR		SYNTYPE					http://www.botanicalcollections.be/specimen/BR0000013523718				2014-05-23	13556								Meise Botanic Garden					Plantae	Tracheophyta	Malvales	Malvaceae	Magnoliopsida		ICBN
PRESERVED_SPECIMEN	Guizotia abyssinica Cass.	SPECIES	BE	http://www.botanicalcollections.be/specimen/BR0000027577110V	BR0000027577110V	Guizotia	abyssinica	Belgium	1976	1976-09-03	Turnhout, kanaal, juist voorbij ringlaan, zuidelijke dijk	Aerts J.					BR							http://www.botanicalcollections.be/specimen/BR0000027577110V	9	3		2017-07-27	76/74								Meise Botanic Garden					Plantae	Tracheophyta	Asterales	Asteraceae	Magnoliopsida		ICBN
PRESERVED_SPECIMEN	Guttiferae	FAMILY	ID	http://data.biodiversitydata.nl/naturalis/specimen/L.3806577	L.3806577			Indonesia			Bird's Head Peninsula, Irian Jaya, N of Ayawasi; Sra, Plot 9-B1.	NT		-1.233333	132.2	WGS84	L	1996/01/31 | 1996/01/01					ASIA	L.3806577																		Plantae	Tracheophyta	Malpighiales	Clusiaceae	Magnoliopsida	Botany	ICN	Plantae|Magnoliopsidae|Malpighiales|Guttiferae
PRESERVED_SPECIMEN	Gymnadenia conopsea (L.) R.Br.	SPECIES	EE	TU254644	TU254644	Gymnadenia	conopsea	Estonia	1924	1924-06-26	Wesenberg (Rakvere) bei Ussimäggi (=Ussimäe lähedal)	G. Mechmershausen					TU	1924-06-26			G. Mechmershausen	1924-06-26T00:00:00.000+0000		TU254644	6	26				habitat: Trift (=karjatee)					433		Natural History Museum, University of Tartu		4			Plantae	Tracheophyta	Asparagales	Orchidaceae	Liliopsida	TU		Viridiplantae; Anthophyta; Monocotyledonae; Asparagales; Orchidaceae; Gymnadenia
PRESERVED_SPECIMEN	Gymnadenia odoratissima (L.) Rich.	SPECIES	EE	TU252083	TU252083	Gymnadenia	odoratissima	Estonia	1959	1959-07-17		E. Lellep					TU	1959-07-17			E. Lellep	1959-07-17T00:00:00.000+0000		TU252083	7	17				habitat: allikasoos							Natural History Museum, University of Tartu		4			Plantae	Tracheophyta	Asparagales	Orchidaceae	Liliopsida	TU		Viridiplantae; Anthophyta; Monocotyledonae; Asparagales; Orchidaceae; Gymnadenia
PRESERVED_SPECIMEN	Gymnocarpium robertianum Newm.	SPECIES	EE	TU256907	TU256907	Gymnocarpium	robertianum	Estonia	1987	1987-06-29	Tagala-Neeni küla tee 2 km	T. Tuisk					TU	1987-06-29			Helena Sepman	2008-10-29T00:00:00.000+0000		TU256907	6	29				habitat: kiviaed							Natural History Museum, University of Tartu		4			Plantae	Tracheophyta	Polypodiales	Cystopteridaceae	Polypodiopsida	TU		Viridiplantae; Monilophyta; Pteridopsida; Woodsiaceae; Gymnocarpium
PRESERVED_SPECIMEN	Gymnocarpium robertianum Newm.	SPECIES	EE	TU256926	TU256926	Gymnocarpium	robertianum	Estonia	1929	1929-08-06	Konetški küla lähedal. Vana-Irboska. Petserimaa. Gipsi (=kipsi) kaevanduse juures.	D.W.J. Reinthal					TU	1929-08-06			Helena Sepman	2008-11-03T00:00:00.000+0000		TU256926	8	6				habitat: Lubjarikastel nõlvadel.							Natural History Museum, University of Tartu		4			Plantae	Tracheophyta	Polypodiales	Cystopteridaceae	Polypodiopsida	TU		Viridiplantae; Monilophyta; Pteridopsida; Woodsiaceae; Gymnocarpium
PRESERVED_SPECIMEN	Gymnogongrus disciplinaris	SPECIES	none	http://coldb.mnhn.fr/catalognumber/mnhn/pc/pc0456717	PC0456717	Gymnogongrus	disciplinaris										P							http://coldb.mnhn.fr/catalognumber/mnhn/pc/pc0456717				2015-09-03														Plantae	Rhodophyta	Gigartinales	Phyllophoraceae	Florideophyceae	PC
PRESERVED_SPECIMEN	Gypsophila tuberculosa Hub.-Mor.	SPECIES	none	http://coldb.mnhn.fr/catalognumber/mnhn/p/p05075897	P05075897	Gypsophila	tuberculosa										P							http://coldb.mnhn.fr/catalognumber/mnhn/p/p05075897				2015-09-04														Plantae	Tracheophyta	Caryophyllales	Caryophyllaceae	Magnoliopsida	P
PRESERVED_SPECIMEN	Habenaria petraea Renz & Grosvenor	SPECIES	MW	http://specimens.kew.org/herbarium/K000049450	K000049450	Habenaria	petraea	Malawi	1977	1977-03-10	Rumphi District. Nyika Plateau. SW of Chelinda camp near top of Mt. Chosi. [MAL-N].	Renz, J.; Grosvenor, R.		-10.68	33.75	WGS84	K		ISOTYPE					K000049450	3	10		2007-04-11	1104	Near rocks in short grassland.												Plantae	Tracheophyta	Asparagales	Orchidaceae	Liliopsida	Herbarium		ORCHIDACEAE
PRESERVED_SPECIMEN	Halecania viridescens Coppins & P.James	SPECIES	GB	c4407367-214b-476d-9365-da6a84121665	BM000501121	Halecania	viridescens	United Kingdom	1980	1980-09-05		Brian J. Coppins		56.066192	-4.640454	WGS84	BM		HOLOTYPE	Scotland			EUROPE	4885387	9	5			8212	on prostrate branch of Salix by shore of lake.					NHMUK:ecatalogue:4885387							Fungi	Ascomycota	Lecanorales	Catillariaceae	Lecanoromycetes	BOT		Ascomycota; Catillariaceae
PRESERVED_SPECIMEN	Harpullia cupanioides Roxb.	SPECIES	ID	http://data.biodiversitydata.nl/naturalis/specimen/L.2303656	L.2303656	Harpullia	cupanioides	Indonesia	1896	1896-09-08	Java, Semarang, Kedoengdjati	Koorders SH					L	1896/09/08		Java			ASIA	L.2303656	9	8																Plantae	Tracheophyta	Sapindales	Sapindaceae	Magnoliopsida	Botany	ICN	Plantae|Magnoliopsidae|Sapindales|Sapindaceae
PRESERVED_SPECIMEN	Hedychium coccineum Buch.-Ham. ex Sm.	SPECIES	CN	http://data.rbge.org.uk/herb/E00531689	E00531689	Hedychium	coccineum	China	2006	2006-05-17	Datang Cun. Vicinity of Dazidi, NNE of Datang. W side of Gaoligong Shan.	Gaoligong Shan Biotic Survey Expedition - Summer 2006		25.777778	98.708333	WGS84	E	2006-05-17		Yunnan				http://data.rbge.org.uk/herb/E00531689	5	17	Tengchong	2013-08-19	30228					2390 M	BGBASE:670140	http://biocol.org/urn:lsid:biocol.org:col:15670						Plantae	Tracheophyta	Zingiberales	Zingiberaceae	Liliopsida	E	ICBN
PRESERVED_SPECIMEN	Helianthemum guttatum (L.) Miller	SPECIES	none	http://coldb.mnhn.fr/catalognumber/mnhn/p/p04637817	P04637817	Tuberaria	guttatum										P							http://coldb.mnhn.fr/catalognumber/mnhn/p/p04637817				2015-09-05														Plantae	Tracheophyta	Malvales	Cistaceae	Magnoliopsida	P
PRESERVED_SPECIMEN	Helicia serrata Blume	SPECIES	MY	http://data.biodiversitydata.nl/naturalis/specimen/L%20%200039590	L 0039590	Helicia	serrata	Malaysia			Malay PeninsulaPulau PenangPenara Bukit	Curtis CH					L	1893/07/31 | 1893/07/01	ISOTYPE		Sleumer HO	1954-10-01T00:00:00.000+0000	ASIA	L 0039590																		Plantae	Tracheophyta	Proteales	Proteaceae	Magnoliopsida	Botany	ICN	Plantae|Magnoliopsidae|Proteales|Proteaceae
PRESERVED_SPECIMEN	Helictotrichon filifolium subsp. velutinum (Boiss.) Romero Zarco	SUBSPECIES	ES	http://www.botanicalcollections.be/specimen/BR0000006862596	BR0000006862596	Helictotrichon	filifolium	Spain	1837	1837-06-01	in Sierra Tejeda cacumine	Boissier E.	velutinum				BR		ISOTYPE					http://www.botanicalcollections.be/specimen/BR0000006862596	6			2008-10-20	S.N.								Meise Botanic Garden					Plantae	Tracheophyta	Poales	Poaceae	Liliopsida		ICBN
PRESERVED_SPECIMEN	Helleborus viridis L.	SPECIES	none	http://coldb.mnhn.fr/catalognumber/mnhn/p/p02559127	P02559127	Helleborus	viridis										P							http://coldb.mnhn.fr/catalognumber/mnhn/p/p02559127				2015-09-04														Plantae	Tracheophyta	Ranunculales	Ranunculaceae	Magnoliopsida	P
PRESERVED_SPECIMEN	Hemidictyum marginatum	species	BR	http://id.luomus.fi/EIG.5353	EIG.5353	Hemidictyum	marginatum	Brazil	1906	1906-01-01/1906-12-31	Serra do Mar	Waket, I.					H	1906		Southeast			Central America, South America and the Antarctic	http://tun.fi/MY.720147			São Paulo	1492084060							H1127463	http://tun.fi/HR.168	Luomus, University of Eastern Finland	Est. S. Paulo, Serra do Mar	GX.2951
PRESERVED_SPECIMEN	Herniaria glabra L.	SPECIES	EE	TU278640	TU278640	Herniaria	glabra	Estonia	1918	1918-07-25	Otepää, Pühajärve ümbr.	H. Bekker					TU	1918-07-25			H. Bekker	1918-07-25T00:00:00.000+0000		TU278640	7	25				habitat: Kuival liivikul.							Natural History Museum, University of Tartu		4			Plantae	Tracheophyta	Caryophyllales	Caryophyllaceae	Magnoliopsida	TU		Viridiplantae; Anthophyta; Eudicotyledonae; Caryophyllales; Caryophyllaceae; Herniaria
PRESERVED_SPECIMEN	Heterosiphonia Montagne, 1842	GENUS	GB	http://data.rbge.org.uk/herb/E00720347	E00720347	Heterosiphonia		United Kingdom	1966	1966-07-21	Great Castle Head, Dale	Irvine, D.E.G.					E	1966-07-21		Wales				http://data.rbge.org.uk/herb/E00720347	7	21	(VC 45) Pembrokeshire	2015-07-16	1018						BGBASE:734839	http://biocol.org/urn:lsid:biocol.org:col:15670						Plantae	Rhodophyta	Ceramiales	Dasyaceae	Florideophyceae	E	ICBN
PRESERVED_SPECIMEN	Hibiscus cancellatus L.	SPECIES	none	http://coldb.mnhn.fr/catalognumber/mnhn/p/p06607437	P06607437	Pavonia	cancellatus										P							http://coldb.mnhn.fr/catalognumber/mnhn/p/p06607437				2015-09-04														Plantae	Tracheophyta	Malvales	Malvaceae	Magnoliopsida	P
PRESERVED_SPECIMEN	Hieracium aphanum Üksip	SPECIES	EE	TU271720	TU271720	Hieracium	aphanum	Estonia	1973	1973-07-23	Jõgeva rajoon, Pedja kn., Tooma	L. Pihlapuu					TU	1973-07-23			A. Sennikov	2003-07-01T00:00:00.000+0000		TU271720	7	23				habitat: metsas teeraja serval							Natural History Museum, University of Tartu		4			Plantae	Tracheophyta	Asterales	Asteraceae	Magnoliopsida	TU		Viridiplantae; Anthophyta; Eudicotyledonae; Asterales; Asteraceae; Hieracium
PRESERVED_SPECIMEN	Hieracium cubillanum de Retz	SPECIES	ES	http://www.botanicalcollections.be/specimen/BR0000009702509	BR0000009702509	Hieracium	cubillanum	Spain	1977	1977-07-22	Riospaso, massif de la Pena Ubina, sous le Puerto de Cubilla, côté nord	De Retz B.					BR		ISOTYPE					http://www.botanicalcollections.be/specimen/BR0000009702509	7	22		2010-07-08	76069								Meise Botanic Garden					Plantae	Tracheophyta	Asterales	Asteraceae	Magnoliopsida		ICBN
PRESERVED_SPECIMEN	Hieracium dicella P.D.Sell & C.West	SPECIES	GB	http://data.rbge.org.uk/herb/E00629555	E00629555	Hieracium	dicella	United Kingdom	1983	1983-07-02		Learmonth, Richard					E	1983-07-02		Scotland				http://data.rbge.org.uk/herb/E00629555	7	2	(VC 83) Midlothian	2013-11-23	2						BGBASE:643490	http://biocol.org/urn:lsid:biocol.org:col:15670						Plantae	Tracheophyta	Asterales	Asteraceae	Magnoliopsida	E	ICBN
PRESERVED_SPECIMEN	Hieracium laggeri Fr.	SPECIES	none	http://coldb.mnhn.fr/catalognumber/mnhn/p/p04129167	P04129167	Pilosella	laggeri										P							http://coldb.mnhn.fr/catalognumber/mnhn/p/p04129167				2015-09-04														Plantae	Tracheophyta	Asterales	Asteraceae	Magnoliopsida	P
PRESERVED_SPECIMEN	Hieracium murorum C.B.Clarke	SPECIES	NL	http://data.biodiversitydata.nl/naturalis/specimen/L.3450861	L.3450861	Hieracium	murorum	Netherlands			Omnia in pappo.	Buse LH; Gildemeester Buse HD					L						EUROPE	L.3450861																		Plantae	Tracheophyta	Asterales	Asteraceae	Magnoliopsida	Botany	ICN	Plantae|Magnoliopsidae|Asterales|Compositae
PRESERVED_SPECIMEN	Hieracium murorum L.	SPECIES	BE	http://www.botanicalcollections.be/specimen/BR0000027577615V	BR0000027577615V	Hieracium	murorum	Belgium	1976	1976-05-22	Anseremme, prov. de Namur, rive droite de la Lesse, bois clairiérés sur le versant de la vallée, sur affleurements calcaires	Duvigneaud J.					BR							http://www.botanicalcollections.be/specimen/BR0000027577615V	5	22		2017-07-27	76B302								Meise Botanic Garden					Plantae	Tracheophyta	Asterales	Asteraceae	Magnoliopsida		ICBN
PRESERVED_SPECIMEN	Hieracium pilosella L.	SPECIES	BE	http://www.botanicalcollections.be/specimen/BR0000027577943V	BR0000027577943V	Pilosella	pilosella	Belgium	1971	1971-06-16	Namen, Bois de Herimont, Han-sur-Lesse	Rammeloo J.					BR							http://www.botanicalcollections.be/specimen/BR0000027577943V	6	16		2017-08-09	2357								Meise Botanic Garden					Plantae	Tracheophyta	Asterales	Asteraceae	Magnoliopsida		ICBN
PRESERVED_SPECIMEN	Hieracium saxorum (Hanb.) P.D.Sell & C.West	SPECIES	GB	http://data.rbge.org.uk/herb/E00629584	E00629584	Hieracium	saxorum	United Kingdom	1983	1983-07-14		Learmonth, Richard					E	1983-07-14		Scotland				http://data.rbge.org.uk/herb/E00629584	7	14	(VC 107) East Sutherland	2013-12-23	1						BGBASE:644068	http://biocol.org/urn:lsid:biocol.org:col:15670						Plantae	Tracheophyta	Asterales	Asteraceae	Magnoliopsida	E	ICBN
PRESERVED_SPECIMEN	Hieracium smithii (Arv.-Touv.) Arv.-Touv.	SPECIES	BE	http://www.botanicalcollections.be/specimen/BR0000027578230V	BR0000027578230V	Pilosella	smithii	Belgium	1887	1887-06-21	Freyr	Tonglet A.					BR							http://www.botanicalcollections.be/specimen/BR0000027578230V	6	21		2017-08-09	S.N.								Meise Botanic Garden					Plantae	Tracheophyta	Asterales	Asteraceae	Magnoliopsida		ICBN
PRESERVED_SPECIMEN	Hieracium spathophyllum Nägeli & Peter	SPECIES	EE	TU305289	TU305289	Pilosella	spathophyllum	Estonia	1963	1963-06-13		L. Pihlapuu					TU	1963-06-13			L. Pihlapuu	1963-06-13T00:00:00.000+0000		TU305289	6	13											Natural History Museum, University of Tartu		4			Plantae	Tracheophyta	Asterales	Asteraceae	Magnoliopsida	TU		Viridiplantae; Anthophyta; Eudicotyledonae; Asterales; Asteraceae; Pilosella
PRESERVED_SPECIMEN	Hierochloe hirta (Schrank) Borbás	SPECIES	EE	TU267668	TU267668	Anthoxanthum	hirta	Estonia	1994	1994-06-01	Voore	Kadi Pae					TU	1994-06			S. Eilart	2009-03-31T00:00:00.000+0000		TU267668	6		Jõgeva maakond			habitat: kraavikallas							Natural History Museum, University of Tartu		4			Plantae	Tracheophyta	Poales	Poaceae	Liliopsida	TU		Viridiplantae; Anthophyta; Monocotyledonae; Poales; Poaceae; Hierochloe
PRESERVED_SPECIMEN	Hierochloe hirta (Schrank) Borbás	SPECIES	EE	TU267683	TU267683	Anthoxanthum	hirta	Estonia	1954	1954-07-11	Ot. rajoon, 20 m Pühajärvest -> S	S. Veldre					TU	1954-07-11			L. Viljasoo	1975-01-01T00:00:00.000+0000		TU267683	7	11				habitat: metsalagendikult, liivakalt kuivalt turba(mätta)mullalt sp. (=hajus)							Natural History Museum, University of Tartu		4			Plantae	Tracheophyta	Poales	Poaceae	Liliopsida	TU		Viridiplantae; Anthophyta; Monocotyledonae; Poales; Poaceae; Hierochloe
PRESERVED_SPECIMEN	Hippocrepis ciliata Willd.	SPECIES	none	http://coldb.mnhn.fr/catalognumber/mnhn/p/p02882387	P02882387	Hippocrepis	ciliata										P							http://coldb.mnhn.fr/catalognumber/mnhn/p/p02882387				2015-09-04														Plantae	Tracheophyta	Fabales	Fabaceae	Magnoliopsida	P
PRESERVED_SPECIMEN	Hippuris vulgaris L. f. litoralis	Forma	FI	http://id.luomus.fi/HA.H0157837	HA.H0157837	Hippuris	vulgaris	FI	1904	1904-08-29	Svartbäck	Brenner, V.	litoralis			WGS84	H		Type	Uusimaa	Not on sheet		Europe	http://tun.fi/MY.99608	8	29	Inkoo	1382503549				1e5			H0157837	http://tun.fi/HR.129	Luomus	N [Nylandia], Ingå, Svartbäck grund hafsvik.	GX.22	60.0211, 23.9571	L.
PRESERVED_SPECIMEN	Hodgsonia macrocarpa Cogn.	SPECIES	ID	http://data.biodiversitydata.nl/naturalis/specimen/U%20%200001466	U 0001466	Hodgsonia	macrocarpa	Indonesia			Priaman	Diepenhorst H; Diepenhorst (leg) H					L		TYPE	Sumatra	Cogniaux CA		ASIA	U 0001466																		Plantae	Tracheophyta	Cucurbitales	Cucurbitaceae	Magnoliopsida	Botany	ICN	Plantae|Magnoliopsidae|Cucurbitales|Cucurbitaceae
PRESERVED_SPECIMEN	Homalomena Schott	GENUS	ID	http://data.biodiversitydata.nl/naturalis/specimen/L.1421587	L.1421587	Homalomena		Indonesia	1985	1985-07-30		Wilde WJJO de; Wilde-Duyfjes BEE de					L	1985/07/30		Sumatra			ASIA	L.1421587	7	30																Plantae	Tracheophyta	Alismatales	Araceae	Liliopsida	Botany	ICN	Plantae|Magnoliopsidae|Alismatales|Araceae
PRESERVED_SPECIMEN	Homogyne alpina Cass.	SPECIES	GB	http://data.rbge.org.uk/herb/E00639946	E00639946	Homogyne	alpina	United Kingdom	2012	2012-08-22	Corrie Sharroch	McHaffie, Heather & Frachon, Natacha					E	2012-08-22		Scotland				http://data.rbge.org.uk/herb/E00639946	8	22	(VC 90) Angus	2015-07-22	63					533 M	BGBASE:648537	http://biocol.org/urn:lsid:biocol.org:col:15670						Plantae	Tracheophyta	Asterales	Asteraceae	Magnoliopsida	E	ICBN
PRESERVED_SPECIMEN	Honckenya peploides (L.) Ehrh.	SPECIES	EE	TU278717	TU278717	Honckenya	peploides	Estonia	1997	1997-07-10	Saaremaa, Tagamõisa ps. Undva rand.	Helen Vellau					TU	1997-07-10			Helen Vellau	1997-07-10T00:00:00.000+0000		TU278717	7	10				habitat: Mererand.							Natural History Museum, University of Tartu		4			Plantae	Tracheophyta	Caryophyllales	Caryophyllaceae	Magnoliopsida	TU		Viridiplantae; Anthophyta; Eudicotyledonae; Caryophyllales; Caryophyllaceae; Honckenya
PRESERVED_SPECIMEN	Hordeum marinum Huds.	SPECIES	GB	http://specimens.kew.org/herbarium/K000790059	K000790059	Hordeum	marinum	United Kingdom	1937	1937-07-23	Holbeach St Matthew, on sea coast bank	Johnston, H.B.					K				Jacobsen, N.			K000790059	7	23		2012-03-28	3038	on sea coast bank												Plantae	Tracheophyta	Poales	Poaceae	Liliopsida	Herbarium		POACEAE
PRESERVED_SPECIMEN	Hordeum murinum subsp. glaucum (Steud.) Tzvelev	SUBSPECIES	EE	TU272770	TU272770	Hordeum	murinum	Estonia	1967	1967-10-09	Tallinn, Kopli raudteejaama ala	A. Remmel	glaucum				TU	1967-10-09			L. Viljasoo	1975-01-01T00:00:00.000+0000		TU272770	10	9				Community type according to the classification of the Estonian vegetation site types; after J. Paal, 1997, revised 2001: Type group: Yards, roadsides, waste grounds | habitat: kogumik							Natural History Museum, University of Tartu		4			Plantae	Tracheophyta	Poales	Poaceae	Liliopsida	TU		Viridiplantae; Anthophyta; Monocotyledonae; Poales; Poaceae; Hordeum
PRESERVED_SPECIMEN	Hordeum vulgare L.	SPECIES	GB	http://specimens.kew.org/herbarium/K000914550	K000914550	Hordeum	vulgare	United Kingdom	2009	2009-06-23	Kew Gardens; North Arboretum	Cope, T.A.		51.48	-0.31	WGS84	K				Cope, T.A.			K000914550	6	23		2014-07-03	RBG 418	in bare soil at the base of large tree near the Orangery (zone 123, OS monad 18.77)												Plantae	Tracheophyta	Poales	Poaceae	Liliopsida	Herbarium		POACEAE
PRESERVED_SPECIMEN	Horsfieldia glabra Warb.	SPECIES	ID	http://data.biodiversitydata.nl/naturalis/specimen/L.1086850	L.1086850	Horsfieldia	glabra	Indonesia				Junghuhn FW					L			Java			ASIA	L.1086850																		Plantae	Tracheophyta	Magnoliales	Myristicaceae	Magnoliopsida	Botany	ICN	Plantae|Magnoliopsidae|Magnoliales|Myristicaceae
PRESERVED_SPECIMEN	Huperzia bampsiana Pic.Serm.	SPECIES	RW	http://www.botanicalcollections.be/specimen/BR0000008054524	BR0000008054524	Phlegmariurus	bampsiana	Rwanda	1972	1972-01-20	Selle entre le Karisimbi et le Visoke | Préfect[ure] Ruhengeri	Bamps P.		-1.483333	29.483333	WGS84	BR		ISOTYPE					http://www.botanicalcollections.be/specimen/BR0000008054524	1	20		2014-05-16	2964	Forêt-prairie à vieux Hagenia | [É]piphyte [] sur Hagenia							Meise Botanic Garden					Plantae	Tracheophyta	Lycopodiales	Lycopodiaceae	Lycopodiopsida		ICBN
PRESERVED_SPECIMEN	Hybanthus floribundus (Lindley) F.Müll.	SPECIES	AU	http://www.botanicalcollections.be/specimen/BR0000013210731	BR0000013210731	Pigea	floribundus	Australia			Murchison River	Oldfield A.					BR	S.D.						http://www.botanicalcollections.be/specimen/BR0000013210731				2013-09-13	S.N.								Meise Botanic Garden					Plantae	Tracheophyta	Malpighiales	Violaceae	Magnoliopsida		ICBN
PRESERVED_SPECIMEN	Hyoscyamus niger L.	SPECIES	EE	TU261910	TU261910	Hyoscyamus	niger	Estonia	1988	1988-07-12	Pärnu l., "Pärnu Kalur"	S. Sepp					TU	1988-07-12			Ella Tammemägi			TU261910	7	12				habitat: mahajäetud aiamaa					1068		Natural History Museum, University of Tartu		4			Plantae	Tracheophyta	Solanales	Solanaceae	Magnoliopsida	TU		Viridiplantae; Anthophyta; Eudicotyledonae; Solanales; Solanaceae; Hyoscyamus
PRESERVED_SPECIMEN	Hyparrhenia bagirmica Stapf	SPECIES	TD	http://coldb.mnhn.fr/catalognumber/mnhn/p/p00109257	P00109257	Hyparrhenia	bagirmica	Chad	1903	1903-09-01		Chevalier, A.J.B.					P				Baldini			http://coldb.mnhn.fr/catalognumber/mnhn/p/p00109257	9			2015-09-04										Plantes de l'Oubangui et du Chari: Baguirmi et Région du Lac Fittri Moïto, Baro Aouni				Plantae	Tracheophyta	Poales	Poaceae	Liliopsida	P
PRESERVED_SPECIMEN	Hyparrhenia dissoluta (Nees ex Steud.) C.E.Hubb.	SPECIES	none	http://coldb.mnhn.fr/catalognumber/mnhn/p/p02019377	P02019377	Hyperthelia	dissoluta										P							http://coldb.mnhn.fr/catalognumber/mnhn/p/p02019377				2015-09-03														Plantae	Tracheophyta	Poales	Poaceae	Liliopsida	P
PRESERVED_SPECIMEN	Hypericum ×cyathiflorum N.Robson	SPECIES	GB	6c1ea400-67a9-4ead-b195-d61cbc3de61e	BM001202113	Hypericum	cyathiflorum	United Kingdom	1977	1977-09-06		Anon.					BM						EUROPE	8098605	9	6			C11684						NHMUK:ecatalogue:8098605							Plantae	Tracheophyta	Malpighiales	Hypericaceae	Magnoliopsida	BOT		Malpighiales; Clusiaceae
PRESERVED_SPECIMEN	Hypericum anagalloides Cham. & Schltdl.	SPECIES	CA	0259a512-ccf1-4a34-b4bc-81fa2dbdc0a6	BM001205826	Hypericum	anagalloides	Canada	1961	1961-06-13		James Alexander (Jim) Calder, K T. MacKay					BM						NORTH_AMERICA	8104439	6	13		2018-02-01	30388						NHMUK:ecatalogue:8104439							Plantae	Tracheophyta	Malpighiales	Hypericaceae	Magnoliopsida	BOT		Malpighiales; Clusiaceae
PRESERVED_SPECIMEN	Hypericum anagalloides Cham. & Schltdl.	SPECIES	CA	b3ec37df-1792-4a80-b2d6-79cc89467415	BM001205824	Hypericum	anagalloides	Canada	1970	1970-08-22		A F. Szczawinski					BM						NORTH_AMERICA	8104436	8	22		2018-02-01	s.n.						NHMUK:ecatalogue:8104436							Plantae	Tracheophyta	Malpighiales	Hypericaceae	Magnoliopsida	BOT		Malpighiales; Clusiaceae
PRESERVED_SPECIMEN	Hypericum androsaemum L.	SPECIES	NZ	1a1a3758-325f-49e9-a9b5-c1703a4a8701	BM001205323	Hypericum	androsaemum	New Zealand	1910	1910-02-01		J E. Tilden, Chase, Deland					BM						OCEANIA	8103746	2				318						NHMUK:ecatalogue:8103746							Plantae	Tracheophyta	Malpighiales	Hypericaceae	Magnoliopsida	BOT		Malpighiales; Clusiaceae
PRESERVED_SPECIMEN	Hypericum ascyron L.	SPECIES	CA	f514c7d8-ab87-4379-98de-03792c99e78f	BM001205332	Hypericum	ascyron	Canada	1880	1880-04-17		C J. Burgess					BM						NORTH_AMERICA	8103760	4	17			s.n.						NHMUK:ecatalogue:8103760							Plantae	Tracheophyta	Malpighiales	Hypericaceae	Magnoliopsida	BOT		Malpighiales; Clusiaceae
PRESERVED_SPECIMEN	Hypericum augustinii N.Robson	SPECIES	GB	03621d63-e777-490d-b1ff-f6db16305a04	BM001202065	Hypericum	augustinii	United Kingdom	1978	1978-09-26		J D. Boeke					BM						EUROPE	8098523	9	26			1677						NHMUK:ecatalogue:8098523							Plantae	Tracheophyta	Malpighiales	Hypericaceae	Magnoliopsida	BOT		Malpighiales; Clusiaceae
PRESERVED_SPECIMEN	Hypericum calycinum L.	SPECIES	CA	240cf6c5-d458-49aa-af60-161e0fc26f93	BM001205340	Hypericum	calycinum	Canada	1951	1951-07-11		William Bird					BM						NORTH_AMERICA	8103772	7	11			1245						NHMUK:ecatalogue:8103772							Plantae	Tracheophyta	Malpighiales	Hypericaceae	Magnoliopsida	BOT		Malpighiales; Clusiaceae
PRESERVED_SPECIMEN	Hypericum canadense L.	SPECIES	CA	4de3cdd5-88e3-4098-a342-df0f702826f6	BM001205742	Hypericum	canadense	Canada	1993	1993-09-21		Phyllis Mary Chorley					BM						NORTH_AMERICA	8104325	9	21		2018-02-01	32						NHMUK:ecatalogue:8104325							Plantae	Tracheophyta	Malpighiales	Hypericaceae	Magnoliopsida	BOT		Malpighiales; Clusiaceae
PRESERVED_SPECIMEN	Hypericum canariense L.	SPECIES	NZ	7d0f4471-71fa-4a36-94cc-088fe9abadb2	BM001205309	Hypericum	canariense	New Zealand	2000	2000-11-09		P J. de Lange					BM						OCEANIA	8103723	11	9			4659						NHMUK:ecatalogue:8103723							Plantae	Tracheophyta	Malpighiales	Hypericaceae	Magnoliopsida	BOT		Malpighiales; Clusiaceae
PRESERVED_SPECIMEN	Hypericum ellipticum Hook.	SPECIES	CA	1f893ae3-a064-4032-a5e4-84f11fd6610f	BM001205904	Hypericum	ellipticum	Canada	1960	1960-08-18		Claude Eugene Garton					BM						NORTH_AMERICA	8104546	8	18		2018-02-01	8313						NHMUK:ecatalogue:8104546							Plantae	Tracheophyta	Malpighiales	Hypericaceae	Magnoliopsida	BOT		Malpighiales; Clusiaceae
PRESERVED_SPECIMEN	Hypericum ellipticum Hook.	SPECIES	CA	2c8be201-4a15-490a-abd7-9355bd849846	BM001205898	Hypericum	ellipticum	Canada	1975	1975-09-20		Samuel Brisson					BM						NORTH_AMERICA	8104537	9	20		2018-02-01	75710						NHMUK:ecatalogue:8104537							Plantae	Tracheophyta	Malpighiales	Hypericaceae	Magnoliopsida	BOT		Malpighiales; Clusiaceae
PRESERVED_SPECIMEN	Hypericum ellipticum Hook.	SPECIES	CA	c9a641ac-1cd7-4f1a-9a3d-88bcf6886ebe	BM001205903	Hypericum	ellipticum	Canada	1965	1965-07-26		K D. Rill					BM						NORTH_AMERICA	8104544	7	26		2018-02-01	1508						NHMUK:ecatalogue:8104544							Plantae	Tracheophyta	Malpighiales	Hypericaceae	Magnoliopsida	BOT		Malpighiales; Clusiaceae
PRESERVED_SPECIMEN	Hypericum ellipticum Hook.	SPECIES	CA	f4917f30-ec9f-46a1-a08b-79bc2fdb6efe	BM001205902	Hypericum	ellipticum	Canada	1877	1877-06-01		John Macoun					BM						NORTH_AMERICA	8104543	6			2018-02-01	345						NHMUK:ecatalogue:8104543							Plantae	Tracheophyta	Malpighiales	Hypericaceae	Magnoliopsida	BOT		Malpighiales; Clusiaceae
PRESERVED_SPECIMEN	Hypericum empetrifolium Willd.	SPECIES	GB	e2546994-ec0b-478a-ac17-abfc41fe84d4	BM001202010	Hypericum	empetrifolium	United Kingdom	1977	1977-09-01		Anon.					BM						EUROPE	8098433	9				C11686						NHMUK:ecatalogue:8098433							Plantae	Tracheophyta	Malpighiales	Hypericaceae	Magnoliopsida	BOT		Malpighiales; Clusiaceae
PRESERVED_SPECIMEN	Hypericum gramineum G.Forst.	SPECIES	AU	8457cd53-1d12-478f-bda5-0c168f1e52fc	BM001205287	Hypericum	gramineum	Australia	1849	1849-01-01		Herb. Lindley					BM						OCEANIA	8103692					1						NHMUK:ecatalogue:8103692							Plantae	Tracheophyta	Malpighiales	Hypericaceae	Magnoliopsida	BOT		Malpighiales; Clusiaceae
PRESERVED_SPECIMEN	Hypericum gramineum G.Forst.	SPECIES	AU	ad0b2894-9889-4a8c-a5fc-9994a998d1c4	BM001205291	Hypericum	gramineum	Australia	1977	1977-05-26		P K. Latz					BM						OCEANIA	8103697	5	26			7118						NHMUK:ecatalogue:8103697							Plantae	Tracheophyta	Malpighiales	Hypericaceae	Magnoliopsida	BOT		Malpighiales; Clusiaceae
PRESERVED_SPECIMEN	Hypericum gramineum G.Forst.	SPECIES	NZ	3e919961-ae6f-4c80-9486-3ee1c5451023	BM001205310	Hypericum	gramineum	New Zealand				Sinclair					BM						OCEANIA	8103724					s.n.						NHMUK:ecatalogue:8103724							Plantae	Tracheophyta	Malpighiales	Hypericaceae	Magnoliopsida	BOT		Malpighiales; Clusiaceae
PRESERVED_SPECIMEN	Hypericum gramineum G.Forst.	SPECIES	NZ	4bf7a03f-272b-42cf-b374-23d75dbec925	BM001205312	Hypericum	gramineum	New Zealand				Robert Lynd					BM						OCEANIA	8103727					s.n.						NHMUK:ecatalogue:8103727							Plantae	Tracheophyta	Malpighiales	Hypericaceae	Magnoliopsida	BOT		Malpighiales; Clusiaceae
PRESERVED_SPECIMEN	Hypericum gramineum G.Forst.	SPECIES	NZ	a65522de-695a-47b2-a9af-0a5b1139c6b2	BM001205313	Hypericum	gramineum	New Zealand				Lilian Suzette Gibbs					BM						OCEANIA	8103728					1248						NHMUK:ecatalogue:8103728							Plantae	Tracheophyta	Malpighiales	Hypericaceae	Magnoliopsida	BOT		Malpighiales; Clusiaceae
PRESERVED_SPECIMEN	Hypericum henryi subsp. henryi	SUBSPECIES	GB	dd88fc4a-f2db-4194-9d6a-d351649b7aca	BM001202160	Hypericum	henryi	United Kingdom	1982	1982-08-27		Keith D. Rushforth	henryi				BM						EUROPE	8098680	8	27			327A						NHMUK:ecatalogue:8098680							Plantae	Tracheophyta	Malpighiales	Hypericaceae	Magnoliopsida	BOT		Malpighiales; Clusiaceae
PRESERVED_SPECIMEN	Hypericum henryi subsp. henryi	SUBSPECIES	NZ	56b60621-d693-4728-8cf9-f705f2ef7012	BM001205324	Hypericum	henryi	New Zealand	1947	1947-02-21		A J. Healy	henryi				BM						OCEANIA	8103747	2	21			H252						NHMUK:ecatalogue:8103747							Plantae	Tracheophyta	Malpighiales	Hypericaceae	Magnoliopsida	BOT		Malpighiales; Clusiaceae
PRESERVED_SPECIMEN	Hypericum hookerianum Wight & Arn.	SPECIES	GB	3c2daf8c-1adc-4c86-9735-48631828e24b	BM001202200	Hypericum	hookerianum	United Kingdom	1978	1978-10-01		B.L.M.					BM						EUROPE	8098743	10				253						NHMUK:ecatalogue:8098743							Plantae	Tracheophyta	Malpighiales	Hypericaceae	Magnoliopsida	BOT		Malpighiales; Clusiaceae
PRESERVED_SPECIMEN	Hypericum hookerianum Wight & Arn.	SPECIES	GB	9f1b9510-9497-476d-973e-bb8bc147b3a4	BM000884432	Hypericum	hookerianum	United Kingdom	2000	2000-01-01		M Foster					BM		HOLOTYPE				EUROPE	4994184					s.n.						NHMUK:ecatalogue:4994184							Plantae	Tracheophyta	Malpighiales	Hypericaceae	Magnoliopsida	BOT		Hypericaceae
PRESERVED_SPECIMEN	Hypericum humifusum L.	SPECIES	NZ	73d282f1-8f08-45da-99a9-7b51005a58f7	BM001205322	Hypericum	humifusum	New Zealand	1977	1977-02-27		H Heine					BM						OCEANIA	8103744	2	27			s.n.						NHMUK:ecatalogue:8103744							Plantae	Tracheophyta	Malpighiales	Hypericaceae	Magnoliopsida	BOT		Malpighiales; Clusiaceae
PRESERVED_SPECIMEN	Hypericum humifusum L.	SPECIES	NZ	b5f3594f-2a90-43eb-8977-7ae49a293fc5	BM001205321	Hypericum	humifusum	New Zealand	1983	1983-02-04		Per Arne Krister (Arne) Strid					BM						OCEANIA	8103743	2	4			22275						NHMUK:ecatalogue:8103743							Plantae	Tracheophyta	Malpighiales	Hypericaceae	Magnoliopsida	BOT		Malpighiales; Clusiaceae
PRESERVED_SPECIMEN	Hypericum ichelense N.Robson	SPECIES	none	74db406a-0f6d-4150-94f3-b81817165bd7	BM000946465	Hypericum	ichelense		1971	1971-06-19	Nearest Named Place: Asia	Dr F. Sorger					BM		HOLOTYPE		N. K. B. Robson		ASIA	473319	6	19			s.n.						NHMUK:ecatalogue:473319							Plantae	Tracheophyta	Malpighiales	Hypericaceae	Magnoliopsida	BOT		Guttiferae
PRESERVED_SPECIMEN	Hypericum japonicum Thunb.	SPECIES	NZ	14e66080-d324-4072-8a2c-046715ac431c	BM000810206	Hypericum	japonicum	New Zealand	1875	1875-01-01		Sven Berggren					BM						OCEANIA	8103739	1				s.n.						NHMUK:ecatalogue:8103739							Plantae	Tracheophyta	Malpighiales	Hypericaceae	Magnoliopsida	BOT		Malpighiales; Clusiaceae
PRESERVED_SPECIMEN	Hypericum kalmianum L.	SPECIES	CA	7e89f242-0390-4e68-996f-af946dcf49d8	BM001205338	Hypericum	kalmianum	Canada	1884	1884-08-01		John Macoun					BM						NORTH_AMERICA	8103769	8				344						NHMUK:ecatalogue:8103769							Plantae	Tracheophyta	Malpighiales	Hypericaceae	Magnoliopsida	BOT		Malpighiales; Clusiaceae
PRESERVED_SPECIMEN	Hypericum lancasteri N.Robson	SPECIES	GB	bae5b64a-92e9-46ab-89d7-187c6c82b5e7	BM001202229	Hypericum	lancasteri	United Kingdom	1982	1982-08-27		Keith D. Rushforth					BM						EUROPE	8098791	8	27			327						NHMUK:ecatalogue:8098791							Plantae	Tracheophyta	Malpighiales	Hypericaceae	Magnoliopsida	BOT		Malpighiales; Clusiaceae
PRESERVED_SPECIMEN	Hypericum latisepalum (N.Robson) N.Robson	SPECIES	GB	4316b522-5a8e-44c0-a422-74eef61ac8b9	BM001191784	Hypericum	latisepalum	United Kingdom	2005	2005-08-01	Nearest Named Place: Wakehurst Place; Township: Ardingly	Anon.		51.069126	-0.087179	WGS84	BM			England			EUROPE	6533401	8			2017-10-19	1988-8790						NHMUK:ecatalogue:6533401							Plantae	Tracheophyta	Malpighiales	Hypericaceae	Magnoliopsida	BOT		Malpighiales; Clusiaceae
PRESERVED_SPECIMEN	Hypericum latisepalum (N.Robson) N.Robson	SPECIES	GB	e1c4eef3-b739-4a71-bba3-8ccfb042ddcd	BM001191785	Hypericum	latisepalum	United Kingdom	2005	2005-08-01	Nearest Named Place: Wakehurst Place; Township: Ardingly	Anon.		51.069126	-0.087179	WGS84	BM			England			EUROPE	6533402	8			2017-10-19	1988-1492						NHMUK:ecatalogue:6533402							Plantae	Tracheophyta	Malpighiales	Hypericaceae	Magnoliopsida	BOT		Malpighiales; Clusiaceae
PRESERVED_SPECIMEN	Hypericum majus Britton	SPECIES	CA	0539eeb3-0186-42d6-8f68-a85280821190	BM001206102	Hypericum	majus	Canada				Richardson					BM						NORTH_AMERICA	8104818				2018-02-01	s.n.						NHMUK:ecatalogue:8104818							Plantae	Tracheophyta	Malpighiales	Hypericaceae	Magnoliopsida	BOT		Malpighiales; Clusiaceae
PRESERVED_SPECIMEN	Hypericum majus Britton	SPECIES	CA	6e915766-2ee5-4776-8edf-2044a6eaec5d	BM001206098	Hypericum	majus	Canada	1951	1951-08-13		Claude Eugene Garton					BM						NORTH_AMERICA	8104812	8	13		2018-02-01	1581						NHMUK:ecatalogue:8104812							Plantae	Tracheophyta	Malpighiales	Hypericaceae	Magnoliopsida	BOT		Malpighiales; Clusiaceae
PRESERVED_SPECIMEN	Hypericum majus Britton	SPECIES	CA	ccda6f7f-a38e-4663-ae4b-bb7187270234	BM001206103	Hypericum	majus	Canada				Richardson					BM						NORTH_AMERICA	8104820				2018-02-01	s.n.						NHMUK:ecatalogue:8104820							Plantae	Tracheophyta	Malpighiales	Hypericaceae	Magnoliopsida	BOT		Malpighiales; Clusiaceae
PRESERVED_SPECIMEN	Hypericum moserianum André	SPECIES	GB	1bc42d17-5843-49ee-8cf0-9730bbb8d848	BM001202259	Hypericum	moserianum	United Kingdom	1977	1977-08-31		Anon.					BM						EUROPE	8098839	8	31			C11657						NHMUK:ecatalogue:8098839							Plantae	Tracheophyta	Malpighiales	Hypericaceae	Magnoliopsida	BOT		Malpighiales; Clusiaceae
PRESERVED_SPECIMEN	Hypericum mutilum subsp. boreale (Britton) J.M.Gillett	SUBSPECIES	CA	79245717-0c2f-4f18-a66a-a25199c7785d	BM001205704	Hypericum	mutilum	Canada				Richardson	boreale				BM						NORTH_AMERICA	8104274				2018-02-01	s.n.						NHMUK:ecatalogue:8104274							Plantae	Tracheophyta	Malpighiales	Hypericaceae	Magnoliopsida	BOT		Malpighiales; Clusiaceae
PRESERVED_SPECIMEN	Hypericum mutilum subsp. mutilum	SUBSPECIES	CA	100a37fb-19ad-4e7a-aabd-71a6254be11c	BM001205647	Hypericum	mutilum	Canada	1921	1921-08-01		F Rolland	mutilum				BM						NORTH_AMERICA	8104197	8			2018-02-01	15921						NHMUK:ecatalogue:8104197							Plantae	Tracheophyta	Malpighiales	Hypericaceae	Magnoliopsida	BOT		Malpighiales; Clusiaceae
PRESERVED_SPECIMEN	Hypericum perforatum subsp. perforatum	SUBSPECIES	CA	53ebef7c-06e9-4c08-9659-216632c75836	BM001205597	Hypericum	perforatum	Canada	1959	1959-08-13		William Thomas Stearn	perforatum				BM						NORTH_AMERICA	8104130	8	13		2018-02-01	2403						NHMUK:ecatalogue:8104130							Plantae	Tracheophyta	Malpighiales	Hypericaceae	Magnoliopsida	BOT		Malpighiales; Clusiaceae
PRESERVED_SPECIMEN	Hypericum perforatum subsp. perforatum	SUBSPECIES	CA	7e415b03-2443-4bd8-ab6f-bf446c6cc219	BM001205601	Hypericum	perforatum	Canada	1956	1956-08-08		L. Jenkins	perforatum				BM						NORTH_AMERICA	8104135	8	8		2018-02-01	7016						NHMUK:ecatalogue:8104135							Plantae	Tracheophyta	Malpighiales	Hypericaceae	Magnoliopsida	BOT		Malpighiales; Clusiaceae
PRESERVED_SPECIMEN	Hypericum perforatum subsp. perforatum	SUBSPECIES	CA	8d51d497-4123-47df-be4d-90dea6d6069e	BM001205603	Hypericum	perforatum	Canada	1986	1986-08-30		S.A. Thompson	perforatum				BM						NORTH_AMERICA	8104138	8	30		2018-02-01	3506						NHMUK:ecatalogue:8104138							Plantae	Tracheophyta	Malpighiales	Hypericaceae	Magnoliopsida	BOT		Malpighiales; Clusiaceae
PRESERVED_SPECIMEN	Hypericum perforatum subsp. perforatum	SUBSPECIES	CA	af7c0f74-5087-44f2-a4fc-f9a68f74b16d	BM001205608	Hypericum	perforatum	Canada	1957	1957-06-09		William Bird	perforatum				BM						NORTH_AMERICA	8104145	6	9		2018-02-01	3171						NHMUK:ecatalogue:8104145							Plantae	Tracheophyta	Malpighiales	Hypericaceae	Magnoliopsida	BOT		Malpighiales; Clusiaceae
PRESERVED_SPECIMEN	Hypericum petiolulatum Hook.f. & Thomson ex Dyer	SPECIES	CN	http://data.rbge.org.uk/herb/E00346427	E00346427	Hypericum	petiolulatum	China	1912		Bord des ruisseaux-plaine de Tong-Tchouan	Maire, E.E.					E	July 1912						http://data.rbge.org.uk/herb/E00346427				2010-02-02						2500 M	BGBASE:398714	http://biocol.org/urn:lsid:biocol.org:col:15670						Plantae	Tracheophyta	Malpighiales	Hypericaceae	Magnoliopsida	E	ICBN
PRESERVED_SPECIMEN	Hypericum pseudohenryi N.Robson	SPECIES	GB	0daf4ec7-b7c5-40e6-a39c-1b5c379b1aef	BM001202277	Hypericum	pseudohenryi	United Kingdom	1991	1991-07-23		Charles Roy Lancaster					BM						EUROPE	8098866	7	23			1660						NHMUK:ecatalogue:8098866							Plantae	Tracheophyta	Malpighiales	Hypericaceae	Magnoliopsida	BOT		Malpighiales; Clusiaceae
PRESERVED_SPECIMEN	Hypericum pseudohenryi N.Robson	SPECIES	GB	7991bcaf-7c52-4db8-bc10-21c035864d22	BM001202270	Hypericum	pseudohenryi	United Kingdom	1978	1978-09-26		J D. Boeke					BM						EUROPE	8098856	9	26			1680						NHMUK:ecatalogue:8098856							Plantae	Tracheophyta	Malpighiales	Hypericaceae	Magnoliopsida	BOT		Malpighiales; Clusiaceae
PRESERVED_SPECIMEN	Hypericum scouleri Hook.	SPECIES	CA	249686a6-0bc9-4264-aebc-a5f09a0b51c8	BM001205464	Hypericum	scouleri	Canada	1885	1885-08-01		George Mercer Dawson					BM						NORTH_AMERICA	8103945	8				350						NHMUK:ecatalogue:8103945							Plantae	Tracheophyta	Malpighiales	Hypericaceae	Magnoliopsida	BOT		Malpighiales; Clusiaceae
PRESERVED_SPECIMEN	Hypericum scouleri Hook.	SPECIES	CA	512cda1f-0936-43d1-866c-b78c786ea6db	BM001205459	Hypericum	scouleri	Canada				Richardson					BM						NORTH_AMERICA	8103938					120						NHMUK:ecatalogue:8103938							Plantae	Tracheophyta	Malpighiales	Hypericaceae	Magnoliopsida	BOT		Malpighiales; Clusiaceae
PRESERVED_SPECIMEN	Hypericum scouleri Hook.	SPECIES	CA	795ea709-4662-48c8-8b4a-7f1cb79bd11c	BM001205466	Hypericum	scouleri	Canada	1956	1956-04-02		William Bird					BM						NORTH_AMERICA	8103948	4	2			2079						NHMUK:ecatalogue:8103948							Plantae	Tracheophyta	Malpighiales	Hypericaceae	Magnoliopsida	BOT		Malpighiales; Clusiaceae
PRESERVED_SPECIMEN	Hypericum socotranum R.D.Good	SPECIES	YE	http://coldb.mnhn.fr/catalognumber/mnhn/p/p00389007	P00389007	Hypericum	socotranum	Yemen	1880	1880-01-01		Balfour, I.B.					P		SYNTYPE		Moggi et Pisacch			http://coldb.mnhn.fr/catalognumber/mnhn/p/p00389007				2015-09-15														Plantae	Tracheophyta	Malpighiales	Hypericaceae	Magnoliopsida	P
PRESERVED_SPECIMEN	Hypnea cenomyce J.Agardh	SPECIES	AU	7bbb33ea-9dcc-4194-acca-d2c4adf87183	BM000974050	Hypnea	cenomyce	Australia				Miss Guillard					BM			South Australia			OCEANIA	713183					s.n.						NHMUK:ecatalogue:713183							Plantae	Rhodophyta	Gigartinales	Cystocloniaceae	Florideophyceae	BOT		Cystocloniaceae
PRESERVED_SPECIMEN	Hypochaeris glabra L.	SPECIES	GB	http://specimens.kew.org/herbarium/K000790780	K000790780	Hypochaeris	glabra	United Kingdom	1948	1948-07-26	Cumnor Hurst Hill	Brenan, Prof. J.P.M.; Jones, E.W.					K							K000790780	7	26		2012-03-28	s.n.													Plantae	Tracheophyta	Asterales	Asteraceae	Magnoliopsida	Herbarium		COMPOSITAE
PRESERVED_SPECIMEN	Hypoglossum hypoglossoides (Stackhouse) F.S.Collins & Hervey	SPECIES	GB	http://data.rbge.org.uk/herb/E00720401	E00720401	Hypoglossum	hypoglossoides	United Kingdom	1993	1993-01-01		M.T.H.					E	1993		Scotland				http://data.rbge.org.uk/herb/E00720401				2015-04-07	168A						BGBASE:738073	http://biocol.org/urn:lsid:biocol.org:col:15670						Plantae	Rhodophyta	Ceramiales	Delesseriaceae	Florideophyceae	E	ICBN
PRESERVED_SPECIMEN	Hypoglossum woodwardii Kutzing	SPECIES	none	http://coldb.mnhn.fr/catalognumber/mnhn/pc/pc0491677	PC0491677	Hypoglossum	woodwardii										P							http://coldb.mnhn.fr/catalognumber/mnhn/pc/pc0491677				2015-09-03														Plantae	Rhodophyta	Ceramiales	Delesseriaceae	Florideophyceae	PC
PRESERVED_SPECIMEN	Impatiens campanulata Wight	SPECIES	none	http://coldb.mnhn.fr/catalognumber/mnhn/p/p04614867	P04614867	Impatiens	campanulata										P							http://coldb.mnhn.fr/catalognumber/mnhn/p/p04614867				2015-09-04														Plantae	Tracheophyta	Ericales	Balsaminaceae	Magnoliopsida	P
PRESERVED_SPECIMEN	Impatiens L.	GENUS	CN	http://data.rbge.org.uk/herb/E00073048	E00073048	Impatiens		China	1991	1991-09-16	E side, above Xinggou	CEE					E	1991-09-16		Sichuan, W				http://data.rbge.org.uk/herb/E00073048	9	16	Ya'an Pref.	1998-12-21	124					2150 M	BGBASE:79173	http://biocol.org/urn:lsid:biocol.org:col:15670						Plantae	Tracheophyta	Ericales	Balsaminaceae	Magnoliopsida	E	ICBN
PRESERVED_SPECIMEN	Impatiens L.	GENUS	CN	http://data.rbge.org.uk/herb/E00208446	E00208446	Impatiens		China	1996	1996-10-21	Area Above Logging Camp Ca 15km Along Road Leading West from Salween Cable Car Crossing, North of Fugong Town	Gaoligong Shan Expedition 1996		27.183333	98.733333	WGS84	E	1996-10-21		Yunnan				http://data.rbge.org.uk/herb/E00208446	10	21	Nujiang Lisu Aut. Pref.	2005-10-24	7908					2500 M	BGBASE:71255	http://biocol.org/urn:lsid:biocol.org:col:15670						Plantae	Tracheophyta	Ericales	Balsaminaceae	Magnoliopsida	E	ICBN
PRESERVED_SPECIMEN	Impatiens siculifer Hook.f.	SPECIES	CN	http://data.rbge.org.uk/herb/E00120084	E00120084	Impatiens	siculifer	China	1912		Mingkwong valley	Forrest, George					E	May 1912		Yunnan				http://data.rbge.org.uk/herb/E00120084				2000-10-31	7687					6-7000 FT	BGBASE:125628	http://biocol.org/urn:lsid:biocol.org:col:15670						Plantae	Tracheophyta	Ericales	Balsaminaceae	Magnoliopsida	E	ICBN
PRESERVED_SPECIMEN	incertae sedis	KINGDOM	GB	c1441612-8082-40d5-8629-8ed390b2af31	BM001202191			United Kingdom	1982	1982-08-04		Anon.					BM						EUROPE	8098730	8	4			81-145 [?]						NHMUK:ecatalogue:8098730												BOT
PRESERVED_SPECIMEN	incertae sedis	KINGDOM	none	http://coldb.mnhn.fr/catalognumber/mnhn/p/p04450677	P04450677												P							http://coldb.mnhn.fr/catalognumber/mnhn/p/p04450677				2015-09-04																			P
PRESERVED_SPECIMEN	Indigofera atropurpurea Roxb.	SPECIES	CN	http://data.rbge.org.uk/herb/E00275458	E00275458	Indigofera	atropurpurea	China	1903		Tsin-Gai.	Cavalerie, Pierre Julien					E	July 1903		Guizhou Province				http://data.rbge.org.uk/herb/E00275458				2011-02-07	1191						BGBASE:309133	http://biocol.org/urn:lsid:biocol.org:col:15670						Plantae	Tracheophyta	Fabales	Fabaceae	Magnoliopsida	E	ICBN
PRESERVED_SPECIMEN	Indigofera ichangensis Craib	SPECIES	CN	http://data.rbge.org.uk/herb/E00284633	E00284633	Indigofera	ichangensis	China	1907			Wilson, Ernest Henry					E	May 1907		Western Hupeh				http://data.rbge.org.uk/herb/E00284633				2008-10-29	3082						BGBASE:298414	http://biocol.org/urn:lsid:biocol.org:col:15670						Plantae	Tracheophyta	Fabales	Fabaceae	Magnoliopsida	E	ICBN
PRESERVED_SPECIMEN	Indigofera spicata var. brevicarpa Gillett	VARIETY	GW	http://www.botanicalcollections.be/specimen/BR0000013865641	BR0000013865641	Indigofera	spicata	Guinea-Bissau	1952	1952-11-19	Gabu, Bajucunda	Collector unknown	brevicarpa				BR		ISOTYPE					http://www.botanicalcollections.be/specimen/BR0000013865641	11	19		2015-03-11	3164								Meise Botanic Garden					Plantae	Tracheophyta	Fabales	Fabaceae	Magnoliopsida		ICBN
PRESERVED_SPECIMEN	Indigofera tritoides Baker	SPECIES	SA	http://data.biodiversitydata.nl/naturalis/specimen/L.2052123	L.2052123	Microcharis	tritoides	Saudi Arabia	1835	1835-10-30	pope Dschedda.	Schimper GHW		21.516667	39.216667	WGS84	L	1835/10/30	SYNTYPE	Makkah Al-Mokarramah	Muller FM		ASIA	L.2052123	10	30																Plantae	Tracheophyta	Fabales	Fabaceae	Magnoliopsida	Botany	ICN	Plantae|Magnoliopsidae|Fabales|Leguminosae-Pap.
PRESERVED_SPECIMEN	Inga punctata Willd.	SPECIES	BR	http://specimens.kew.org/herbarium/K000876695	K000876695	Inga	punctata	Brazil			4 dap up river from manaos.	Sanderman, C.					K				Pennington, T.D.			K000876695				2013-01-30	2230	growing near small settlement in full exposure	Shrub tree with cream colored flowers very bright green foliage											Plantae	Tracheophyta	Fabales	Fabaceae	Magnoliopsida	Herbarium		LEGUMINOSAE-MIMOSOIDEAE
PRESERVED_SPECIMEN	Ionopsis utricularioides (Sw.) Lindl.	SPECIES	PR	http://www.botanicalcollections.be/specimen/BR0000006572044	BR0000006572044	Ionopsis	utricularioides	Puerto Rico	1886	1886-05-22	prope Adjuntas	Sintenis P.					BR		TYPE					http://www.botanicalcollections.be/specimen/BR0000006572044	5	22		2008-04-24	4407								Meise Botanic Garden					Plantae	Tracheophyta	Asparagales	Orchidaceae	Liliopsida		ICBN
PRESERVED_SPECIMEN	Ipomoea cairica (L.) Sweet	SPECIES	US	http://www.botanicalcollections.be/specimen/BR0000005951413	BR0000005951413	Ipomoea	cairica	United States			Oahu	Meyen F.J.F.					BR	S.D.						http://www.botanicalcollections.be/specimen/BR0000005951413				2012-09-20	S.N.								Meise Botanic Garden					Plantae	Tracheophyta	Solanales	Convolvulaceae	Magnoliopsida		ICBN
PRESERVED_SPECIMEN	Ipomoea tiliacea (Willd.) Choisy	SPECIES	none	http://coldb.mnhn.fr/catalognumber/mnhn/p/p03538527	P03538527	Ipomoea	tiliacea										P							http://coldb.mnhn.fr/catalognumber/mnhn/p/p03538527				2015-09-04														Plantae	Tracheophyta	Solanales	Convolvulaceae	Magnoliopsida	P
PRESERVED_SPECIMEN	Ipomoea triloba L.	SPECIES	ID	http://data.biodiversitydata.nl/naturalis/specimen/L.2729386	L.2729386	Ipomoea	triloba	Indonesia	1986	1986-10-18	Walopara/Soá, Flores.	Verheyen					L	1986/10/18		Lesser Sunda Islands			ASIA	L.2729386	10	18																Plantae	Tracheophyta	Solanales	Convolvulaceae	Magnoliopsida	Botany	ICN	Plantae|Magnoliopsidae|Solanales|Convolvulaceae
PRESERVED_SPECIMEN	Ipomoea tubata Nees	SPECIES	BR	http://specimens.kew.org/herbarium/K000944863	K000944863	Turbina	tubata	Brazil			25km NE of Brasilia near Corrego Landim.	Hunt, D.R.; Ramos, J.F.					K				Verdcourt, B.			K000944863				2013-08-09	5477													Plantae	Tracheophyta	Solanales	Convolvulaceae	Magnoliopsida	Herbarium		CONVOLVULACEAE
PRESERVED_SPECIMEN	Ipomopsis pringlei (A.Gray) Henrickson	SPECIES	MX	http://coldb.mnhn.fr/catalognumber/mnhn/p/p00643727	P00643727	Ipomopsis	pringlei	Mexico	1886	1886-09-01		Pringle, C.G.					P		ISOTYPE					http://coldb.mnhn.fr/catalognumber/mnhn/p/p00643727	9			2015-09-25										State of Chihuahua - Mountains near Chihuahua				Plantae	Tracheophyta	Ericales	Polemoniaceae	Magnoliopsida	P
PRESERVED_SPECIMEN	Iris chamaeiris Bertol.	SPECIES	FR	http://coldb.mnhn.fr/catalognumber/mnhn/p/p02159617	P02159617	Iris	chamaeiris	France	1860	1860-04-01		Eugène, P.		43.5476	5.52352	WGS84	P			Provence-Alpes-Côte-d'Azur				http://coldb.mnhn.fr/catalognumber/mnhn/p/p02159617	4	1		2015-09-03										Bertol				Plantae	Tracheophyta	Asparagales	Iridaceae	Liliopsida	P
PRESERVED_SPECIMEN	Iris tenuifolia Pall.	SPECIES	CN	http://data.rbge.org.uk/herb/E00141058	E00141058	Iris	tenuifolia	China	1997	1997-07-02	Plain south of Heka Shan	Sino-British Qinghai Expedition 1997		35.803333	99.854167	WGS84	E	1997-07-02		Qinghai				http://data.rbge.org.uk/herb/E00141058	7	2	Hainan Zang Aut. Pref.	2001-09-10	110					3650 M	BGBASE:75622	http://biocol.org/urn:lsid:biocol.org:col:15670						Plantae	Tracheophyta	Asparagales	Iridaceae	Liliopsida	E	ICBN
PRESERVED_SPECIMEN	Isoetes lacustris L.	SPECIES	EE	TU258592	TU258592	Isoetes	lacustris	Estonia	2009	2009-08-09		Kai Rünk					TU	2009-08-09			Kaili Orav | Kai Rünk			TU258592	8	9	Harju maakond										Natural History Museum, University of Tartu		4			Plantae	Tracheophyta	Isoetales	Isoetaceae	Lycopodiopsida	TU		Viridiplantae; Lycopodiophyta; Lycopodiopsida; Isoetales; Isoetaceae; Isoetes
PRESERVED_SPECIMEN	Isoetes lacustris L.	SPECIES	EE	TU258594	TU258594	Isoetes	lacustris	Estonia	2009	2009-08-09		Kai Rünk					TU	2009-08-09			Kaili Orav | Kai Rünk			TU258594	8	9	Harju maakond										Natural History Museum, University of Tartu		4			Plantae	Tracheophyta	Isoetales	Isoetaceae	Lycopodiopsida	TU		Viridiplantae; Lycopodiophyta; Lycopodiopsida; Isoetales; Isoetaceae; Isoetes
PRESERVED_SPECIMEN	Iva xanthifolia Nutt.	SPECIES	CA	d56f5c27-fd06-42cc-a966-03f4e3037854	BM000832670	Cyclachaena	xanthifolia	Canada	1895	1895-08-03		John Macoun					BM			Alberta			NORTH_AMERICA	4235621	8	3			s.n.						NHMUK:ecatalogue:4235621							Plantae	Tracheophyta	Asterales	Asteraceae	Magnoliopsida	BOT		Asteraceae
PRESERVED_SPECIMEN	Jacobaea nemorensis (L.) E.Wiebe	SPECIES	CN	http://data.rbge.org.uk/herb/E00413240	E00413240	Senecio	nemorensis	China	1897	1897-07-11	Environs de Gan Pin, dand la mont. (He-che-teou)	Martin, Léon & Bodinier, Emile M.					E	1897-07-11		Guizhou Province				http://data.rbge.org.uk/herb/E00413240	7	11		2010-11-23							BGBASE:445351	http://biocol.org/urn:lsid:biocol.org:col:15670						Plantae	Tracheophyta	Asterales	Asteraceae	Magnoliopsida	E	ICBN
PRESERVED_SPECIMEN	Jasminum subhumile W.W.Sm.	SPECIES	CN	http://data.rbge.org.uk/herb/E00759729	E00759729	Chrysojasminum	subhumile	China	1910		Pu-piao valley	Forrest, George					E	April 1910		Yunnan				http://data.rbge.org.uk/herb/E00759729				2015-07-27	5502A					4000 FT	BGBASE:756129	http://biocol.org/urn:lsid:biocol.org:col:15670						Plantae	Tracheophyta	Lamiales	Oleaceae	Magnoliopsida	E	ICBN
PRESERVED_SPECIMEN	Juncus capitatus Weigel	SPECIES	none	http://coldb.mnhn.fr/catalognumber/mnhn/p/p02191357	P02191357	Juncus	capitatus										P							http://coldb.mnhn.fr/catalognumber/mnhn/p/p02191357				2015-09-03														Plantae	Tracheophyta	Poales	Juncaceae	Liliopsida	P
PRESERVED_SPECIMEN	Juncus L.	GENUS	NL	http://data.biodiversitydata.nl/naturalis/specimen/L.3147619	L.3147619	Juncus		Netherlands			Numspeet, achter 't Ronde Luis.	Jansen P; Wachter WH					L	1918/07/31 | 1918/07/01					EUROPE	L.3147619																		Plantae	Tracheophyta	Poales	Juncaceae	Liliopsida	Botany	ICN	Plantae|Magnoliopsidae|Poales|Juncaceae
PRESERVED_SPECIMEN	Juniperus communis L.	SPECIES	none	http://coldb.mnhn.fr/catalognumber/mnhn/p/p01582387	P01582387	Juniperus	communis										P							http://coldb.mnhn.fr/catalognumber/mnhn/p/p01582387				2015-09-03														Plantae	Tracheophyta	Pinales	Cupressaceae	Pinopsida	P
PRESERVED_SPECIMEN	Juniperus pingii var. wilsonii (Rehder) Silba	VARIETY	CN	http://data.rbge.org.uk/herb/E00234693	E00234693	Juniperus	pingii	China	1914	1914-05-21	Supra Huali	Schneider, C.	wilsonii				E	1914-05-21		Sichuan Province				http://data.rbge.org.uk/herb/E00234693	5	21		2006-12-15	1411					4200 M	BGBASE:244370	http://biocol.org/urn:lsid:biocol.org:col:15670						Plantae	Tracheophyta	Pinales	Cupressaceae	Pinopsida	E	ICBN
PRESERVED_SPECIMEN	Juniperus rigida subsp. rigida	SUBSPECIES	CN	http://data.rbge.org.uk/herb/E00236008	E00236008	Juniperus	rigida	China	1923	1923-03-29	Inner Mongolia; Hatemen Tien Shan K'ou	Ching, R.C.	rigida				E	1923-03-29						http://data.rbge.org.uk/herb/E00236008	3	29		2007-01-15	4					1375-1825 M	BGBASE:246096	http://biocol.org/urn:lsid:biocol.org:col:15670						Plantae	Tracheophyta	Pinales	Cupressaceae	Pinopsida	E	ICBN
PRESERVED_SPECIMEN	Juniperus squamata Buch.-Ham. ex D.Don	SPECIES	CN	http://data.rbge.org.uk/herb/E00228295	E00228295	Juniperus	squamata	China	1931	1931-10-29	Szechuan: S.W. Tachienlu	Cheng, W.C.					E	1931-10-29		Sichuan Province				http://data.rbge.org.uk/herb/E00228295	10	29		2007-01-19	3552						BGBASE:244406	http://biocol.org/urn:lsid:biocol.org:col:15670						Plantae	Tracheophyta	Pinales	Cupressaceae	Pinopsida	E	ICBN
PRESERVED_SPECIMEN	Juniperus tibetica Komarov	SPECIES	CN	http://data.rbge.org.uk/herb/E00064237	E00064237	Juniperus	tibetica	China	1996	1996-09-04		Sino-American-British Yushu Expedition (1996)					E	1996-09-04						http://data.rbge.org.uk/herb/E00064237	9	4		1998-06-23	2876						BGBASE:69619	http://biocol.org/urn:lsid:biocol.org:col:15670						Plantae	Tracheophyta	Pinales	Cupressaceae	Pinopsida	E	ICBN
PRESERVED_SPECIMEN	Justicia hirsuta Vahl	SPECIES	BR	http://specimens.kew.org/herbarium/K000529347	K000529347	Nelsonia	hirsuta	Brazil				Sellow					K							K000529347				2008-04-07	s.n.													Plantae	Tracheophyta	Lamiales	Acanthaceae	Magnoliopsida	Herbarium		ACANTHACEAE
PRESERVED_SPECIMEN	Kalanchoe latisepala N.E.Br.	SPECIES	none	http://specimens.kew.org/herbarium/K000232911	K000232911	Kalanchoe	latisepala		1907	1907-03-22	See "Other Comments"	Brown, N.E.					K		HOLOTYPE		Brown, N.E.	1907-03-22T00:00:00.000+0000		K000232911	3	22		2004-04-23	s.n.		See information on label											Plantae	Tracheophyta	Saxifragales	Crassulaceae	Magnoliopsida	Herbarium		CRASSULACEAE
PRESERVED_SPECIMEN	Kallymenia J.Agardh, 1842	GENUS	GB	http://data.rbge.org.uk/herb/E00725537	E00725537	Kallymenia		United Kingdom	1973	1973-07-17	Hildasay	R. Fletcher					E	1973-07-17		Scotland				http://data.rbge.org.uk/herb/E00725537	7	17	(VC 112) Shetland	2015-07-24							BGBASE:738746	http://biocol.org/urn:lsid:biocol.org:col:15670						Plantae	Rhodophyta	Gigartinales	Kallymeniaceae	Florideophyceae	E	ICBN
PRESERVED_SPECIMEN	Kalmiella ericoides (Wright ex Griseb.) Small	SPECIES	CU	http://data.biodiversitydata.nl/naturalis/specimen/L%20%200007231	L 0007231	Kalmia	ericoides	Cuba			CubaW. CubaLa Grifa	Wright C					L		ISOTYPE				SOUTH_AMERICA	L 0007231																		Plantae	Tracheophyta	Ericales	Ericaceae	Magnoliopsida	Botany	ICN	Plantae|Magnoliopsidae|Ericales|Ericaceae
PRESERVED_SPECIMEN	Kanakomyrtus myrtopsidoides (Guillaum.) N.Snow	SPECIES	NC	http://coldb.mnhn.fr/catalognumber/mnhn/p/p00602547	P00602547	Kanakomyrtus	myrtopsidoides	New Caledonia	1951	1951-05-08		Hürlimann, H.					P				Snow			http://coldb.mnhn.fr/catalognumber/mnhn/p/p00602547	5	8		2015-09-04										Pic de la Sunshine				Plantae	Tracheophyta	Myrtales	Myrtaceae	Magnoliopsida	P
PRESERVED_SPECIMEN	Knautia arvensis Coult.	SPECIES	GB	http://specimens.kew.org/herbarium/K000914396	K000914396	Knautia	arvensis	United Kingdom	2009	2009-06-03	Kew Gardens; West Arboretum	Cope, T.A.		51.48	-0.31	WGS84	K				Cope, T.A.			K000914396	6	3		2014-01-20	RBG 396	in the Robinsonian Meadow in front of 'Climbers & Creepers' (zone 224, OS monad 18.77)												Plantae	Tracheophyta	Dipsacales	Caprifoliaceae	Magnoliopsida	Herbarium		CAPRIFOLIACEAE
PRESERVED_SPECIMEN	Knautia sylvatica (L.) Duby	SPECIES	FR	http://coldb.mnhn.fr/catalognumber/mnhn/p/p04335227	P04335227	Knautia	sylvatica	France									P							http://coldb.mnhn.fr/catalognumber/mnhn/p/p04335227				2015-09-04														Plantae	Tracheophyta	Dipsacales	Caprifoliaceae	Magnoliopsida	P
PRESERVED_SPECIMEN	Knema laurina Warb.	SPECIES	ID	http://data.biodiversitydata.nl/naturalis/specimen/U.1429670	U.1429670	Knema	laurina	Indonesia	1920	1920-09-25	G. Paroengpoeng. Tjampea	Bakhuizen van den Brink Jr RC					L	1920/09/25		Java	Sinclair J	1959-09-02T00:00:00.000+0000	ASIA	U.1429670	9	25																Plantae	Tracheophyta	Magnoliales	Myristicaceae	Magnoliopsida	Botany	ICN	Plantae|Magnoliopsidae|Magnoliales|Myristicaceae
PRESERVED_SPECIMEN	Koeleria cristata Pers.	SPECIES	none	http://coldb.mnhn.fr/catalognumber/mnhn/p/p03137867	P03137867	Koeleria	cristata										P							http://coldb.mnhn.fr/catalognumber/mnhn/p/p03137867				2015-09-04														Plantae	Tracheophyta	Poales	Poaceae	Liliopsida	P
PRESERVED_SPECIMEN	Koeleria phleoides (Vill.) Pers.	SPECIES	none	http://coldb.mnhn.fr/catalognumber/mnhn/p/p02223337	P02223337	Rostraria	phleoides										P							http://coldb.mnhn.fr/catalognumber/mnhn/p/p02223337				2015-09-04														Plantae	Tracheophyta	Poales	Poaceae	Liliopsida	P
PRESERVED_SPECIMEN	Korthalsella complanata Engl.	SPECIES	none	http://coldb.mnhn.fr/catalognumber/mnhn/p/p00641717	P00641717	Korthalsella	complanata					s.c.					P				Danser			http://coldb.mnhn.fr/catalognumber/mnhn/p/p00641717				2015-09-26														Plantae	Tracheophyta	Santalales	Santalaceae	Magnoliopsida	P
PRESERVED_SPECIMEN	Kotschya goetzei (Harms) Verdc.	SPECIES	TZ	http://data.rbge.org.uk/herb/E00718757	E00718757	Kotschya	goetzei	Tanzania, United Republic of	1899	1899-01-01		Goetze, W.					E	1899	ISOTYPE					http://data.rbge.org.uk/herb/E00718757				2015-07-28	1070						BGBASE:737741	http://biocol.org/urn:lsid:biocol.org:col:15670						Plantae	Tracheophyta	Fabales	Fabaceae	Magnoliopsida	E	ICBN
PRESERVED_SPECIMEN	Lactuca muralis (L.) Gaertn.	SPECIES	EE	TU305257	TU305257	Lactuca	muralis	Estonia	1984	1984-07-01							TU	1984-07						TU305257	7												Natural History Museum, University of Tartu		4			Plantae	Tracheophyta	Asterales	Asteraceae	Magnoliopsida	TU		Viridiplantae; Anthophyta; Eudicotyledonae; Asterales; Asteraceae; Mycelis
PRESERVED_SPECIMEN	Lagerstroemia intermedia var. oblonga Craib	VARIETY	TH	3dea0b4c-6f76-4ee6-9553-bf0f1b36849d	BM000944600	Lagerstroemia	intermedia	Thailand	1909	1909-04-05		Arthur Francis George Kerr	oblonga				BM		HOLOTYPE		C X. Furtado		ASIA	439307	4	5			578						NHMUK:ecatalogue:439307							Plantae	Tracheophyta	Myrtales	Lythraceae	Magnoliopsida	BOT		Lythraceae
PRESERVED_SPECIMEN	Lamanonia tomentosa Kuntze	SPECIES	PY	http://data.biodiversitydata.nl/naturalis/specimen/L%20%200019927	L 0019927	Lamanonia	tomentosa	Paraguay	1884	1884-03-15	Paraguay	Balansa B					L	1884/03/15	TYPE		Hoogland RD	1977-05-01T00:00:00.000+0000	SOUTH_AMERICA	L 0019927	3	15																Plantae	Tracheophyta	Oxalidales	Cunoniaceae	Magnoliopsida	Botany	ICN	Plantae|Magnoliopsidae|Oxalidales|Cunoniaceae
PRESERVED_SPECIMEN	Lamium maculatum L.	SPECIES	EE	TU259539	TU259539	Lamium	maculatum	Estonia	1965	1965-07-14	Kohtla-Järve, Toila	L. Pihlapuu					TU	1965-07-14			L. Pihlapuu	1965-07-14T00:00:00.000+0000		TU259539	7	14				habitat: paekaldal metsas							Natural History Museum, University of Tartu		4			Plantae	Tracheophyta	Lamiales	Lamiaceae	Magnoliopsida	TU		Viridiplantae; Anthophyta; Eudicotyledonae; Lamiales; Lamiaceae; Lamium
PRESERVED_SPECIMEN	Lappula deflexa (Wahlenb.) Garcke	SPECIES	FR	http://coldb.mnhn.fr/catalognumber/mnhn/p/p00597667	P00597667	Hackelia	deflexa	France	1927	1927-07-31		Thiébaut, C.					P			73 Savoie				http://coldb.mnhn.fr/catalognumber/mnhn/p/p00597667	7	31		2015-09-05										Termignon (Savoie) : forêt de conifères				Plantae	Tracheophyta	Boraginales	Boraginaceae	Magnoliopsida	P
PRESERVED_SPECIMEN	Lasianthus africanus subsp. biokoensis Jannerup	SUBSPECIES	GQ	http://www.botanicalcollections.be/specimen/BR0000008847782	BR0000008847782	Lasianthus	africanus	Equatorial Guinea	1986	1986-12-10	Moca, entre Cascata do rio Iladyi e Moca, 32NMJ6377	de Carvalho M.F.	biokoensis				BR		HOLOTYPE					http://www.botanicalcollections.be/specimen/BR0000008847782	12	10		2008-02-01	2780	zona pantanosa							Meise Botanic Garden					Plantae	Tracheophyta	Gentianales	Rubiaceae	Magnoliopsida		ICBN
PRESERVED_SPECIMEN	Lathyrus pisiformis L.	SPECIES	EE	TU262281	TU262281	Lathyrus	pisiformis	Estonia	1906	1906-06-14	Lodensee (=Klooga)	E. Niclasen					TU	1906-06-14			Joh. Aidas			TU262281	6	14									227.		Natural History Museum, University of Tartu		4			Plantae	Tracheophyta	Fabales	Fabaceae	Magnoliopsida	TU		Viridiplantae; Anthophyta; Eudicotyledonae; Fabales; Fabaceae; Lathyrus
PRESERVED_SPECIMEN	Launaea resedifolia subsp. asirensis N.Kilian	SUBSPECIES	YE	c80211e0-88a3-40eb-a415-49c071558b3e	BM000517025	Launaea	resedifolia	Yemen	1975	1975-06-13		John Richard Ironside Wood	asirensis				BM		HOLOTYPE				ASIA	4970919	6	13			Y/75/315						NHMUK:ecatalogue:4970919							Plantae	Tracheophyta	Asterales	Asteraceae	Magnoliopsida	BOT		Asteraceae
PRESERVED_SPECIMEN	Laurencia botryoides (C.Agardh) Gaillon	SPECIES	NZ	bf456039-2071-43dd-9b4d-4d5004dc38f8	BM001039417	Laurencia	botryoides	New Zealand				Anon.					BM						OCEANIA	714677					3383						NHMUK:ecatalogue:714677							Plantae	Rhodophyta	Ceramiales	Rhodomelaceae	Florideophyceae	BOT		Rhodomelaceae
PRESERVED_SPECIMEN	Lavandula galgalloensis A.G.Mill.	SPECIES	SO	http://www.botanicalcollections.be/specimen/BR0000006250690	BR0000006250690	Lavandula	galgalloensis	Somalia	1973	1973-01-10	Galgallo, 64 km SSW of Bosaso at eastern end of Al Mado Range	Bally P.R.O. & Melville R.					BR		ISOTYPE					http://www.botanicalcollections.be/specimen/BR0000006250690	1	10		2008-01-10	15821								Meise Botanic Garden					Plantae	Tracheophyta	Lamiales	Lamiaceae	Magnoliopsida		ICBN
PRESERVED_SPECIMEN	Lavandula vera DC.	SPECIES	FR	http://coldb.mnhn.fr/catalognumber/mnhn/p/p04468077	P04468077	Lavandula	vera	France	1843	1843-07-16		Jordan		45.84429	4.82763	WGS84	P			69 Rhône				http://coldb.mnhn.fr/catalognumber/mnhn/p/p04468077	7	16		2015-09-04										Lieux arides des collines calcaires à Couzon, près Lyon ;				Plantae	Tracheophyta	Lamiales	Lamiaceae	Magnoliopsida	P
PRESERVED_SPECIMEN	Lawrencia berthae (F.Muell.) Melville	SPECIES	AU	http://www.botanicalcollections.be/specimen/BR0000013472849	BR0000013472849	Lawrencia	berthae	Australia			SW Australia	Von Mueller F.					BR	S.D.						http://www.botanicalcollections.be/specimen/BR0000013472849				2013-04-29	S.N.								Meise Botanic Garden					Plantae	Tracheophyta	Malvales	Malvaceae	Magnoliopsida		ICBN
PRESERVED_SPECIMEN	Leandra acutiflora Cogn.	SPECIES	BR	http://coldb.mnhn.fr/catalognumber/mnhn/p/p00116857	P00116857	Leandra	acutiflora	Brazil	1833	1833-01-01		Vauthier, M.					P				Wurdack			http://coldb.mnhn.fr/catalognumber/mnhn/p/p00116857				2016-03-04										Rio de Janeiro: Serra dos Orgaos				Plantae	Tracheophyta	Myrtales	Melastomataceae	Magnoliopsida	P
PRESERVED_SPECIMEN	Leandra regnellii Cogn.	SPECIES	BR	http://coldb.mnhn.fr/catalognumber/mnhn/p/p00116877	P00116877	Leandra	regnellii	Brazil				Loefgren, A.					P				Souza & Baumgratz			http://coldb.mnhn.fr/catalognumber/mnhn/p/p00116877				2015-09-04														Plantae	Tracheophyta	Myrtales	Melastomataceae	Magnoliopsida	P
PRESERVED_SPECIMEN	Lecanora freyi Poelt	species	AT	http://id.luomus.fi/HA.H9504229	HA.H9504229	Lecanora	freyi	AT	1958	1958-07-01/1958-07-31	Hählekopf	Poelt, J.		47.346667	10.070556	WGS84	H	7.1958	Isotype	Vorarlberg, Bregenz District			Europe	http://id.luomus.fi/MY.5309391	7			1530276580		Südseitig auf Kieselkalk.		1		2000	H9504229	http://tun.fi/HR.85		Bregenzer Wald, Ifenstock: Vorarlberg (Kleines Walsertal): Kleiner Gipfel am Hählekopf.	GX.22	47.346667 10.070556 WGS84	Poelt
PRESERVED_SPECIMEN	Lecidea morbifera Vain.	species	RU	http://id.luomus.fi/HA.H9503400	HA.H9503400	Lecidea	morbifera	RU	1877	1877-01-01/1877-12-31		Vainio (Wainio), E. A.		66.075207	30.323723	WGS84	H		Isolectotype	Murmansk Oblast			Europe	http://id.luomus.fi/MY.5317429				1530276703				1			H9503400	http://tun.fi/HR.85		Fennia, Kuusamo, Ukonvaara [Russia].	GX.22	66.075207 30.323723 WGS84	Vain.
PRESERVED_SPECIMEN	Lecidella elaeochroma f. elaeochroma	FORM	GB	http://data.rbge.org.uk/herb/E00423216	E00423216	Lecidella	elaeochroma	United Kingdom	2009	2009-09-01	Invertromie Wood	Ellis, Christopher J.	elaeochroma				E	2009-09-01		Scotland				http://data.rbge.org.uk/herb/E00423216	9	1	(VC 96) Easterness	2015-11-13	L679						BGBASE:455890	http://biocol.org/urn:lsid:biocol.org:col:15670						Fungi	Ascomycota	Lecanorales	Lecanoraceae	Lecanoromycetes	E	ICBN
PRESERVED_SPECIMEN	Leiophyllum buxifolium (Berg.) Ell.	SPECIES	none	http://coldb.mnhn.fr/catalognumber/mnhn/p/p00710247	P00710247	Kalmia	buxifolium		1833	1833-04-01		s.c.					P							http://coldb.mnhn.fr/catalognumber/mnhn/p/p00710247	4			2015-09-27														Plantae	Tracheophyta	Ericales	Ericaceae	Magnoliopsida	P
PRESERVED_SPECIMEN	Lenticula trisulca (L.) Scop.	SPECIES	BE	http://www.botanicalcollections.be/specimen/BR0000011393696	BR0000011393696	Lemna	trisulca	Belgium	1863	1863-01-01	Anderlecht	Van den Borren L.					BR							http://www.botanicalcollections.be/specimen/BR0000011393696				2017-04-04	S.N.								Meise Botanic Garden					Plantae	Tracheophyta	Alismatales	Araceae	Liliopsida		ICBN
PRESERVED_SPECIMEN	Leonurus cardiaca L.	SPECIES	EE	TU271781	TU271781	Leonurus	cardiaca	Estonia	1971	1971-07-18	Harju rajoon, Tallinn, Iru, Pirita jõe	Ü. Kaarep					TU	1971-07-18			E. Tammemägi	1971-07-18T00:00:00.000+0000		TU271781	7	18				habitat: kaldavallil							Natural History Museum, University of Tartu		4			Plantae	Tracheophyta	Lamiales	Lamiaceae	Magnoliopsida	TU		Viridiplantae; Anthophyta; Eudicotyledonae; Lamiales; Lamiaceae; Leonurus
PRESERVED_SPECIMEN	Lepidosperma sieberi Kunth	SPECIES	none	http://coldb.mnhn.fr/catalognumber/mnhn/p/p01702497	P01702497	Lepidosperma	sieberi										P							http://coldb.mnhn.fr/catalognumber/mnhn/p/p01702497				2015-09-03														Plantae	Tracheophyta	Poales	Cyperaceae	Liliopsida	P
PRESERVED_SPECIMEN	Lepisorus mehrae Fraser-Jenk.	SPECIES	IN	84a3de1f-2004-4cdf-943a-9171f7c0d00c	BM001022812	Lepisorus	mehrae	India	1996	1996-09-22		Christopher Roy Fraser-Jenkins					BM		HOLOTYPE	Uttar Pradesh			ASIA	2337082	9	22			24390 (FN 368)	Forested stream-gorge with cliffs etc.					NHMUK:ecatalogue:2337082							Plantae	Tracheophyta	Polypodiales	Polypodiaceae	Polypodiopsida	BOT		Polypodiaceae
PRESERVED_SPECIMEN	Leptochilus Kaulf.	GENUS	ID	http://data.biodiversitydata.nl/naturalis/specimen/L.3548739	L.3548739	Leptochilus		Indonesia	1931	1931-05-10	Mount Kinabalu, B.N. Borneo,Tenompok.	Clemens J; Clemens MS					L	1931/05/10		Borneo			ASIA	L.3548739	5	10																Plantae	Tracheophyta	Polypodiales	Polypodiaceae	Polypodiopsida	Botany	ICN	Plantae|Pteropsida|Polypodiales|Lomariopsidaceae
PRESERVED_SPECIMEN	Lespedeza polystachya Michx.	SPECIES	US	http://www.botanicalcollections.be/specimen/BR0000005110216	BR0000005110216	Lespedeza	polystachya	United States	1832	1832-08-01	Bethlehem	Wied M.					BR							http://www.botanicalcollections.be/specimen/BR0000005110216	8			2009-10-13	S.N.								Meise Botanic Garden					Plantae	Tracheophyta	Fabales	Fabaceae	Magnoliopsida		ICBN
PRESERVED_SPECIMEN	Letharia californica (Lév.) Hue var. foveatoretigera Räsänen	species	US	http://id.luomus.fi/HA.H9500314	HA.H9500314	Letharia	californica	US	1942	1942-12-29	Upper Kern River.	Culbertson, J. D.	foveatoretigera				H		Isotype		Veli Räsänen	29.12.1942		http://tun.fi/MY.134706	12	29		1382504313							H9500314	http://tun.fi/HR.129	Luomus		GX.22		(Lév.) Hue
PRESERVED_SPECIMEN	Levenhookia preissii F.Muell.	SPECIES	AU	5662aa6c-cc32-4bd3-bc3e-bcefec58ee32	BM000984009	Levenhookia	preissii	Australia	1901	1901-12-23		Cecil Rollo Payton Andrews					BM			Western Australia	Juliet A. Wege		OCEANIA	2230162	12	23			542						NHMUK:ecatalogue:2230162							Plantae	Tracheophyta	Asterales	Stylidiaceae	Magnoliopsida	BOT		Stylidiaceae
PRESERVED_SPECIMEN	Linaria heterophylla (Schousboe) Steudel	SPECIES	YE	50881717-4d29-4d16-913d-6a1291d4679e	BM000522091	Nanorrhinum	heterophylla	Yemen	1978	1978-02-08		John Richard Ironside Wood					BM		HOLOTYPE				ASIA	4976815	2	8			2223						NHMUK:ecatalogue:4976815							Plantae	Tracheophyta	Lamiales	Plantaginaceae	Magnoliopsida	BOT		Scrophulariaceae
PRESERVED_SPECIMEN	Linnaea borealis L.	SPECIES	EE	TU262492	TU262492	Linnaea	borealis	Estonia	1955	1955-07-22	Põlva rajoon, Ahja jõe lähedal Oosemäe lähedal	K. Eichwald					TU	1955-07-22			K. Eichwald	1955-07-22T00:00:00.000+0000		TU262492	7	22				habitat: männi-kuuse segametsa all ühel kohal massiliselt							Natural History Museum, University of Tartu		4			Plantae	Tracheophyta	Dipsacales	Caprifoliaceae	Magnoliopsida	TU		Viridiplantae; Anthophyta; Eudicotyledonae; Dipsacales; Caprifoliaceae; Linnaea
PRESERVED_SPECIMEN	Linnaea borealis L.	SPECIES	EE	TU262535	TU262535	Linnaea	borealis	Estonia	1942	1942-07-11	Tooma: Männikjärv	Albert Üksip					TU	1942-07-11			Albert Üksip	1942-07-11T00:00:00.000+0000		TU262535	7	11				habitat: in pineto muscoso (=samblarohkes männikus), ad ripam lacus (=järvekaldal)					42-103		Natural History Museum, University of Tartu		4			Plantae	Tracheophyta	Dipsacales	Caprifoliaceae	Magnoliopsida	TU		Viridiplantae; Anthophyta; Eudicotyledonae; Dipsacales; Caprifoliaceae; Linnaea
PRESERVED_SPECIMEN	Liparis loeselii (L.) Rich.	SPECIES	GB	2e3a3ba7-ce82-4579-9704-a84dad3cab72	BM001138898	Liparis	loeselii	United Kingdom	1930	1930-08-17	Nearest Named Place: Wicken Poors' Fen	A J. Wilmott		52.307598	0.2897	WGS84	BM			England			EUROPE	4236617	8	17			3711						NHMUK:ecatalogue:4236617							Plantae	Tracheophyta	Asparagales	Orchidaceae	Liliopsida	BOT		Orchidaceae
PRESERVED_SPECIMEN	Lippia candicans Hayek	SPECIES	BR	http://coldb.mnhn.fr/catalognumber/mnhn/p/p03608487	P03608487	Lippia	candicans	Brazil				Gardner, G.					P		ISOTYPE		Salimena			http://coldb.mnhn.fr/catalognumber/mnhn/p/p03608487				2015-09-04										s.loc.				Plantae	Tracheophyta	Lamiales	Verbenaceae	Magnoliopsida	P
PRESERVED_SPECIMEN	Lippia hirta (Cham.) Schauer	SPECIES	BR	http://coldb.mnhn.fr/catalognumber/mnhn/p/p00166267	P00166267	Lippia	hirta	Brazil				Sellow, F.					P							http://coldb.mnhn.fr/catalognumber/mnhn/p/p00166267				2015-11-07										Brasilia				Plantae	Tracheophyta	Lamiales	Verbenaceae	Magnoliopsida	P
PRESERVED_SPECIMEN	Lithocarpus honbaensis A.Camus	SPECIES	VN	http://coldb.mnhn.fr/catalognumber/mnhn/p/p06812317	P06812317	Lithocarpus	honbaensis	Viet Nam	1917	1917-01-01		Forestier, Service		19.9	105.383	WGS84	P			Thanh Hóa				http://coldb.mnhn.fr/catalognumber/mnhn/p/p06812317	1	1		2015-09-05										Annam : Divis. de Baï Thuong				Plantae	Tracheophyta	Fagales	Fagaceae	Magnoliopsida	P
PRESERVED_SPECIMEN	Litsea angulata Blume	SPECIES	ID	http://data.biodiversitydata.nl/naturalis/specimen/L.1805114	L.1805114	Litsea	angulata	Indonesia	1949	1949-08-23	Indonesia, Sumatra Selatan, Bangka, Lobok Besar	Kostermans AJGH; Anta					L	1949/08/23		Sumatra	Kostermans AJGH		ASIA	L.1805114	8	23																Plantae	Tracheophyta	Laurales	Lauraceae	Magnoliopsida	Botany	ICN	Plantae|Magnoliopsidae|Laurales|Lauraceae
PRESERVED_SPECIMEN	Litsea cubeba Pers.	SPECIES	ID	http://data.biodiversitydata.nl/naturalis/specimen/L.1805455	L.1805455	Litsea	cubeba	Indonesia	1899	1899-10-23	Indonesia, Jawa Timur, Ngadisari	Koorders SH					L	1899/10/23		Java	Unknown		ASIA	L.1805455	10	23																Plantae	Tracheophyta	Laurales	Lauraceae	Magnoliopsida	Botany	ICN	Plantae|Magnoliopsidae|Laurales|Lauraceae
PRESERVED_SPECIMEN	Litsea diversifolia Blume	SPECIES	ID	http://data.biodiversitydata.nl/naturalis/specimen/L.1794692	L.1794692	Litsea	diversifolia	Indonesia	1961	1961-04-12	Island W. Sumbawa. Batudulang, Batu lanteh Mt.; secondary vegetation.	Kostermans AJGH					L	1961/04/12		Lesser Sunda Islands			ASIA	L.1794692	4	12																Plantae	Tracheophyta	Laurales	Lauraceae	Magnoliopsida	Botany	ICN	Plantae|Magnoliopsidae|Laurales|Lauraceae
PRESERVED_SPECIMEN	Lobelia dortmanna L.	SPECIES	EE	TU252564	TU252564	Lobelia	dortmanna	Estonia	1930	1930-07-20		Albert Üksip					TU	1930-07-20			Albert Üksip	1930-07-20T00:00:00.000+0000		TU252564	7	20				habitat: Am Ufer des Sees (=järvekaldal) mit (=koos) Isoetes lacustris					1800; 30-305		Natural History Museum, University of Tartu		4			Plantae	Tracheophyta	Asterales	Campanulaceae	Magnoliopsida	TU		Viridiplantae; Anthophyta; Eudicotyledonae; Asterales; Campanulaceae; Lobelia
PRESERVED_SPECIMEN	Logania linifolia Schltdl.	SPECIES	AU	http://www.botanicalcollections.be/specimen/BR0000005859351	BR0000005859351	Logania	linifolia	Australia			Murray Desert	Von Mueller F.					BR	S.D.						http://www.botanicalcollections.be/specimen/BR0000005859351				2012-06-26	S.N.								Meise Botanic Garden					Plantae	Tracheophyta	Gentianales	Loganiaceae	Magnoliopsida		ICBN
PRESERVED_SPECIMEN	Logania ovata R.Br.	SPECIES	AU	http://www.botanicalcollections.be/specimen/BR0000005859337	BR0000005859337	Logania	ovata	Australia			Port Lincoln	Wilhelmi C.					BR	S.D.						http://www.botanicalcollections.be/specimen/BR0000005859337				2012-06-26	S.N.								Meise Botanic Garden					Plantae	Tracheophyta	Gentianales	Loganiaceae	Magnoliopsida		ICBN
PRESERVED_SPECIMEN	Logania ovata R.Br.	SPECIES	AU	http://www.botanicalcollections.be/specimen/BR0000005859665	BR0000005859665	Logania	ovata	Australia	1850	1850-01-01	Lofty ranges	Wilhelmi C.					BR							http://www.botanicalcollections.be/specimen/BR0000005859665				2012-06-26	S.N.								Meise Botanic Garden					Plantae	Tracheophyta	Gentianales	Loganiaceae	Magnoliopsida		ICBN
PRESERVED_SPECIMEN	Lolium perenne L.	SPECIES	GB	http://specimens.kew.org/herbarium/K000914505	K000914505	Lolium	perenne	United Kingdom	2009	2009-06-23	Kew Gardens; North Arboretum	Cope, T.A.		51.48	-0.31	WGS84	K				Cope, T.A.			K000914505	6	23		2014-06-10	RBG 419	in bare soil at the base of large tree near the Orangery (zone 123, OS monad 18.77)												Plantae	Tracheophyta	Poales	Poaceae	Liliopsida	Herbarium		POACEAE
PRESERVED_SPECIMEN	Lolium temulentum L.	SPECIES	EE	TU258971	TU258971	Lolium	temulentum	Estonia	1962	1962-08-27		L. Pihlapuu					TU	1962-08-27			L. Pihlapuu	1962-08-27T00:00:00.000+0000		TU258971	8	27				habitat: raudteel							Natural History Museum, University of Tartu		4			Plantae	Tracheophyta	Poales	Poaceae	Liliopsida	TU		Viridiplantae; Anthophyta; Monocotyledonae; Poales; Poaceae; Lolium
PRESERVED_SPECIMEN	Lonicera caprifolium L.	SPECIES	EE	TU301581	TU301581	Lonicera	caprifolium	Estonia	1974	1974-08-17	Pärnu raj., Aesoo küla	E. Tammemägi					TU	1974-08-17			E. Tammemägi	1974-08-17T00:00:00.000+0000		TU301581	8	17				habitat: Juhan ja Marta Lossmanni talu õues							Natural History Museum, University of Tartu		4			Plantae	Tracheophyta	Dipsacales	Caprifoliaceae	Magnoliopsida	TU		Viridiplantae; Anthophyta; Eudicotyledonae; Dipsacales; Caprifoliaceae; Lonicera
PRESERVED_SPECIMEN	Lophosoria quadripinnata	species	BR	http://id.luomus.fi/H.1067250	H.1067250	Lophosoria	quadripinnata	Brazil	1857	1857-03-18		Regnell					H	18.03.1857		São Paulo			Central America, South America and the Antarctic	http://tun.fi/MY.744346	3	18		1492084431							H1067250	http://tun.fi/HR.168	Luomus, University of Eastern Finland	Prov. S. Paulo	GX.231
PRESERVED_SPECIMEN	Loxogramme assimilis Ching	SPECIES	CN	http://data.rbge.org.uk/herb/E00414426	E00414426	Loxogramme	assimilis	China	1912		Pin-fa	Cavalerie, Pierre Julien					E	October 1912		Yunnan Province				http://data.rbge.org.uk/herb/E00414426				2011-02-21	3854						BGBASE:454599	http://biocol.org/urn:lsid:biocol.org:col:15670						Plantae	Tracheophyta	Polypodiales	Polypodiaceae	Polypodiopsida	E	ICBN
PRESERVED_SPECIMEN	Loxogramme avenia (Blume) Pr.	SPECIES	ID	http://data.biodiversitydata.nl/naturalis/specimen/L.3554878	L.3554878	Loxogramme	avenia	Indonesia			Java.	Unknown					L						ASIA	L.3554878																		Plantae	Tracheophyta	Polypodiales	Polypodiaceae	Polypodiopsida	Botany	ICN	Plantae|Pteropsida|Polypodiales|Loxogrammaceae
PRESERVED_SPECIMEN	Ludwigia adscendens subsp. adscendens	SUBSPECIES	ID	http://data.biodiversitydata.nl/naturalis/specimen/U.1447695	U.1447695	Ludwigia	adscendens	Indonesia	1925	1925-05-21	Kananggar.	Iboet	adscendens				L	1925/05/21		Lesser Sunda Islands			ASIA	U.1447695	5	21																Plantae	Tracheophyta	Myrtales	Onagraceae	Magnoliopsida	Botany	ICN	Plantae|Magnoliopsidae|Myrtales|Onagraceae
PRESERVED_SPECIMEN	Lunaria rediviva L.	SPECIES	EE	TU254768	TU254768	Lunaria	rediviva	Estonia	1978	1978-06-08	Harju rajoon, Kostiranna	S. Asu					TU	1978-06-08			Ü. Kukk	1978-06-08T00:00:00.000+0000		TU254768	6	8											Natural History Museum, University of Tartu		4			Plantae	Tracheophyta	Brassicales	Brassicaceae	Magnoliopsida	TU		Viridiplantae; Anthophyta; Eudicotyledonae; Brassicales; Brassicaceae; Lunaria
PRESERVED_SPECIMEN	Luzula arcuata (Wahlenb.) Sw.	SPECIES	GB	http://data.rbge.org.uk/herb/E00668953	E00668953	Luzula	arcuata	United Kingdom	2013	2013-07-11	Above Coire an Lochain, Cairn Gorm	Curry, Pat					E	2013-07-11		Scotland				http://data.rbge.org.uk/herb/E00668953	7	11	(VC 96) Easterness	2015-07-14	6					1157 M	BGBASE:682119	http://biocol.org/urn:lsid:biocol.org:col:15670						Plantae	Tracheophyta	Poales	Juncaceae	Liliopsida	E	ICBN
PRESERVED_SPECIMEN	Lycopodiella inundata (L.) Holub	SPECIES	EE	TU252625	TU252625	Lycopodiella	inundata	Estonia	1972	1972-05-11		E. Tammemägi					TU	1972-05-11			Kaili Orav	2008-09-23T00:00:00.000+0000		TU252625	5	11				habitat: liivikul							Natural History Museum, University of Tartu		4			Plantae	Tracheophyta	Lycopodiales	Lycopodiaceae	Lycopodiopsida	TU		Viridiplantae; Lycopodiophyta; Lycopodiopsida; Lycopodiales; Lycopodiaceae; Lycopodiella
PRESERVED_SPECIMEN	Lycopodiella inundata (L.) Holub	SPECIES	none	http://coldb.mnhn.fr/catalognumber/mnhn/p/p01227127	P01227127	Lycopodiella	inundata										P							http://coldb.mnhn.fr/catalognumber/mnhn/p/p01227127				2015-09-03														Plantae	Tracheophyta	Lycopodiales	Lycopodiaceae	Lycopodiopsida	P
PRESERVED_SPECIMEN	Lycopodium clavatum L.	SPECIES	EE	TU256992	TU256992	Lycopodium	clavatum	Estonia	1972	1972-06-26	Põlva raj. Taevaskoja. TA Biol. jaam.	T. Uustalu					TU	1972-06-26			T. Uustalu			TU256992	6	26				habitat: palumets							Natural History Museum, University of Tartu		4			Plantae	Tracheophyta	Lycopodiales	Lycopodiaceae	Lycopodiopsida	TU		Viridiplantae; Lycopodiophyta; Lycopodiopsida; Lycopodiales; Lycopodiaceae; Lycopodium
PRESERVED_SPECIMEN	Lycopodium clavatum L.	SPECIES	NL	http://data.biodiversitydata.nl/naturalis/specimen/L.3043424	L.3043424	Lycopodium	clavatum	Netherlands			Zeist achter Nikandra.	Brakman C					L	1908/03/31 | 1908/03/01					EUROPE	L.3043424																		Plantae	Tracheophyta	Lycopodiales	Lycopodiaceae	Lycopodiopsida	Botany	ICN	Plantae|Lycopsida|Lycopodiales|Lycopodiaceae
PRESERVED_SPECIMEN	Lycopodium inundatum L.	SPECIES	GB	2c3bf806-3e7e-4b61-a1fd-770293172f59	BM001060251	Lycopodiella	inundatum	United Kingdom	1880	1880-07-01		Walter Waters Reeves		51.307793	0.287735	WGS84	BM			England			EUROPE	2422089	7				1651						NHMUK:ecatalogue:2422089							Plantae	Tracheophyta	Lycopodiales	Lycopodiaceae	Lycopodiopsida	BOT		Pteridophyta; Lycopodiaceae
PRESERVED_SPECIMEN	Lycopodium nummulariifolium Bl.	SPECIES	ID	http://data.biodiversitydata.nl/naturalis/specimen/L.3474871	L.3474871	Phlegmariurus	nummulariifolium	Indonesia	1973	1973-02-15	Island N. Sumatra, Bt. Lawang, Bohorok, langkat.	Dransfield J					L	1973/02/15		Sumatra			ASIA	L.3474871	2	15																Plantae	Tracheophyta	Lycopodiales	Lycopodiaceae	Lycopodiopsida	Botany	ICN	Plantae|Lycopsida|Lycopodiales|Lycopodiaceae
PRESERVED_SPECIMEN	Lycopodium volubile G.Forst.	SPECIES	ID	http://data.biodiversitydata.nl/naturalis/specimen/L%20%200057400	L 0057400	Pseudodiphasium	volubile	Indonesia				Unknown					L		LECTOTYPE	Java	Adelbert AGL		ASIA	L 0057400																		Plantae	Tracheophyta	Lycopodiales	Lycopodiaceae	Lycopodiopsida	Botany	ICN	Plantae|Lycopsida|Lycopodiales|Lycopodiaceae
PRESERVED_SPECIMEN	Lygodium circinnatum (Burm.) Sw.	SPECIES	ID	http://data.biodiversitydata.nl/naturalis/specimen/L.3575783	L.3575783	Lygodium	circinnatum	Indonesia	1979	1979-05-30	Sulawesi (Celebes), S. Sulawesi, near Gumbassa River.	Hennipman E		-1	120	WGS84	L	1979/05/30		Sulawesi			ASIA	L.3575783	5	30																Plantae	Tracheophyta	Schizaeales	Lygodiaceae	Polypodiopsida	Botany	ICN	Plantae|Pteropsida|Schizaeales|Schizaeaceae
PRESERVED_SPECIMEN	Lyngbya aestuarii Liebm. ex Gomont	SPECIES	GB	http://data.rbge.org.uk/herb/E00703514	E00703514	Lyngbya	aestuarii	United Kingdom	1852	1852-07-12	Brodick Bay						E	1852-07-12		Scotland				http://data.rbge.org.uk/herb/E00703514	7	12	(VC 100) Clyde Isles	2015-05-07							BGBASE:720703	http://biocol.org/urn:lsid:biocol.org:col:15670						Bacteria	Cyanobacteria	Nostocales	Oscillatoriaceae	Cyanophyceae	E	ICBN
PRESERVED_SPECIMEN	Lysimachia thyrsiflora L.	SPECIES	NL	http://data.biodiversitydata.nl/naturalis/specimen/L.3362182	L.3362182	Lysimachia	thyrsiflora	Netherlands	1950	1950-05-27	Nieuwkoop-noorden (Z-H), plassengebied.	Heel WA van					L	1950/05/27					EUROPE	L.3362182	5	27																Plantae	Tracheophyta	Ericales	Primulaceae	Magnoliopsida	Botany	ICN	Plantae|Magnoliopsidae|Ericales|Primulaceae
PRESERVED_SPECIMEN	Lysinema ciliatum R.Br.	SPECIES	AU	http://coldb.mnhn.fr/catalognumber/mnhn/p/p00644937	P00644937	Lysinema	ciliatum	Australia	1802	1802-01-01		Brown, R.					P							http://coldb.mnhn.fr/catalognumber/mnhn/p/p00644937				2015-09-05										Lucky Bay				Plantae	Tracheophyta	Ericales	Ericaceae	Magnoliopsida	P
PRESERVED_SPECIMEN	Lythrum salicaria L.	SPECIES	AU	http://www.botanicalcollections.be/specimen/BR0000008024206	BR0000008024206	Lythrum	salicaria	Australia			S.L.	Collector unknown					BR	S.D.						http://www.botanicalcollections.be/specimen/BR0000008024206				2012-06-15	S.N.								Meise Botanic Garden					Plantae	Tracheophyta	Myrtales	Lythraceae	Magnoliopsida		ICBN
PRESERVED_SPECIMEN	Lythrum vulneraria Ait. ex Schrank	SPECIES	US	http://www.botanicalcollections.be/specimen/BR0000005847334	BR0000005847334	Lythrum	vulneraria	United States	1838	1838-01-01	St. Louis	Riehl N.					BR							http://www.botanicalcollections.be/specimen/BR0000005847334				2012-06-18	180								Meise Botanic Garden					Plantae	Tracheophyta	Myrtales	Lythraceae	Magnoliopsida		ICBN
PRESERVED_SPECIMEN	Mabea paniculata Spruce ex Benth.	SPECIES	BR	http://specimens.kew.org/herbarium/K001211914	K001211914	Mabea	paniculata	Brazil	1991	1991-12-30	Vila de Alter do Chão.	Ferreira, L.V.					K							K001211914	12	30		2015-12-17	57													Plantae	Tracheophyta	Malpighiales	Euphorbiaceae	Magnoliopsida	Herbarium		EUPHORBIACEAE
PRESERVED_SPECIMEN	Macaranga lamellata Whitmore	SPECIES	MY	http://specimens.kew.org/herbarium/K001044911	K001044911	Macaranga	lamellata	Malaysia	1971	1971-09-16	District: Ranau; West of Tempias	Dewol; Leopold					K		HOLOTYPE		Whitmore, T.C.			K001044911	9	16		2015-08-26	74346	On ridge primary forest	Bark: gray. Fruits: green red											Plantae	Tracheophyta	Malpighiales	Euphorbiaceae	Magnoliopsida	Herbarium		EUPHORBIACEAE
PRESERVED_SPECIMEN	Macrolobium fragrans Baker f.	SPECIES	AO	8a5b7ce1-60f5-4ce2-80d9-3accee9d1e71	BM000842241	Anthonotha	fragrans	Angola	1918	1918-11-26		John Gossweiler		-12.295286	17.544676	WGS84	BM		HOLOTYPE		A.G. Voorhoeve		AFRICA	4522394	11	26			7577						NHMUK:ecatalogue:4522394							Plantae	Tracheophyta	Fabales	Fabaceae	Magnoliopsida	BOT		Magnoliophyta; Magnoliopsida; Fabales; Fabaceae
PRESERVED_SPECIMEN	Maerua angolensis DC.	SPECIES	SN	78343aeb-9429-4141-a591-e9db1b8d726e	BM000949977	Maerua	angolensis	Senegal	1824	1824-10-01		René Louiche Desfontaines		14.366965	-14.467653	WGS84	BM		HOLOTYPE		Lars Erik Kers		AFRICA	2706922	10				s.n.						NHMUK:ecatalogue:2706922							Plantae	Tracheophyta	Brassicales	Capparaceae	Magnoliopsida	BOT		Capparaceae
PRESERVED_SPECIMEN	Maesa japonica (Thunb.) Moritzi	SPECIES	CN	http://data.rbge.org.uk/herb/E00284661	E00284661	Maesa	japonica	China	1899	1899-11-10	Tou Yun.	Cavalerie, Pierre Julien					E	1899-11-10		Guizhou				http://data.rbge.org.uk/herb/E00284661	11	10		2011-02-07							BGBASE:298656	http://biocol.org/urn:lsid:biocol.org:col:15670						Plantae	Tracheophyta	Ericales	Primulaceae	Magnoliopsida	E	ICBN
PRESERVED_SPECIMEN	Malabaila secacul (Mill.) Boiss.	SPECIES	SY	http://coldb.mnhn.fr/catalognumber/mnhn/p/p04197937	P04197937	Leiotulus	secacul	Syrian Arab Republic	1929	1929-05-09		Gombault, R.		36.21168	37.1473	WGS84	P			Aleppo				http://coldb.mnhn.fr/catalognumber/mnhn/p/p04197937	5	9		2016-03-09										Alep (Syrie du Nord)				Plantae	Tracheophyta	Apiales	Apiaceae	Magnoliopsida	P
PRESERVED_SPECIMEN	Malus sieversii M.Roem.	SPECIES	US	http://www.botanicalcollections.be/specimen/BR0000013227203	BR0000013227203	Malus	sieversii	United States			Upsala	Anderson					BR	S.D.						http://www.botanicalcollections.be/specimen/BR0000013227203				2013-11-27	S.N.								Meise Botanic Garden					Plantae	Tracheophyta	Rosales	Rosaceae	Magnoliopsida		ICBN
PRESERVED_SPECIMEN	Malva alcea L.	SPECIES	EE	TU301607	TU301607	Malva	alcea	Estonia	1967	1967-07-21	Kingissepa raj., Kihelkonna	L. Pihlapuu					TU	1967-07-21			L. Pihlapuu	1967-07-21T00:00:00.000+0000		TU301607	7	21				habitat: teeserval							Natural History Museum, University of Tartu		4			Plantae	Tracheophyta	Malvales	Malvaceae	Magnoliopsida	TU		Viridiplantae; Anthophyta; Eudicotyledonae; Malvales; Malvaceae; Malva
PRESERVED_SPECIMEN	Malva borealis Wallr.	SPECIES	EE	TU301669	TU301669	Malva	borealis	Estonia	1928	1928-07-27	Pärnumaa, Pärakülast lõunas	T. Lippmaa					TU	1928-07-27			T. Lippmaa	1928-07-27T00:00:00.000+0000		TU301669	7	27				habitat: kitsas metsariba (kuuse-sega)							Natural History Museum, University of Tartu		4			Plantae	Tracheophyta	Malvales	Malvaceae	Magnoliopsida	TU		Viridiplantae; Anthophyta; Eudicotyledonae; Malvales; Malvaceae; Malva
PRESERVED_SPECIMEN	Malva crispa (L.) L.	SPECIES	EE	TU301702	TU301702	Malva	crispa	Estonia	1955	1955-08-25	TRÜ Botaanikaaia süstemaatika osakonnas	K. Eichwald					TU	1955-08-25			K. Eichwald	1955-08-25T00:00:00.000+0000		TU301702	8	25				habitat: kultuuris							Natural History Museum, University of Tartu		4			Plantae	Tracheophyta	Malvales	Malvaceae	Magnoliopsida	TU		Viridiplantae; Anthophyta; Eudicotyledonae; Malvales; Malvaceae; Malva
PRESERVED_SPECIMEN	Malva pusilla Sm.	SPECIES	EE	TU301687	TU301687	Malva	pusilla	Estonia	1975	1975-08-05	Põlva raj., Eoste küla, Mäe talu						TU	1975-08-05			V. Kuusk	1982-03-01T00:00:00.000+0000		TU301687	8	5				habitat: talu õues							Natural History Museum, University of Tartu		4			Plantae	Tracheophyta	Malvales	Malvaceae	Magnoliopsida	TU		Viridiplantae; Anthophyta; Eudicotyledonae; Malvales; Malvaceae; Malva
PRESERVED_SPECIMEN	Mammea griseo-flavescens P.F.Stevens	SPECIES	MG	http://data.biodiversitydata.nl/naturalis/specimen/WAG.1522881	WAG.1522881	Mammea	griseo-flavescens	Madagascar	1988	1988-04-29	Col de Manangotry, E of Andohahely Forest Reserve = Res. Nat. 11.	Leeuwenberg AJM; Floret JJ; Lowry II PP; Rajemisa R		-24.733333	46.866667	WGS84	L	1988/04/29	TYPE	Toliara (Tulear)	Stevens PF		AFRICA	WAG.1522881	4	29																Plantae	Tracheophyta	Malpighiales	Calophyllaceae	Magnoliopsida	Botany	ICN	Plantae|Magnoliopsidae|Malpighiales|Guttiferae
PRESERVED_SPECIMEN	Manihot tripartita Müll.Arg.	SPECIES	PY	http://coldb.mnhn.fr/catalognumber/mnhn/p/p00648647	P00648647	Manihot	tripartita	Paraguay	1901	1901-01-01		Hassler, E.					P							http://coldb.mnhn.fr/catalognumber/mnhn/p/p00648647				2015-09-25										Iter ad Paraguariam septentrionalem. In regione cursus superioris fluminis Apa.				Plantae	Tracheophyta	Malpighiales	Euphorbiaceae	Magnoliopsida	P
PRESERVED_SPECIMEN	Manilkara lososiana Kenfack & Ewango	SPECIES	CM	http://data.rbge.org.uk/herb/E00679622	E00679622	Manilkara	lososiana	Cameroon	1997	1997-04-04	Ndian Division; Korup Park. Chimpanzee Camp, behind tourist kitchen.	Kenfack, D.		5.069167	8.859722	WGS84	E	1997-04-04	ISOTYPE	Sud-Ouest				http://data.rbge.org.uk/herb/E00679622	4	4		2014-03-26	625					180 M	BGBASE:701977	http://biocol.org/urn:lsid:biocol.org:col:15670						Plantae	Tracheophyta	Ericales	Sapotaceae	Magnoliopsida	E	ICBN
PRESERVED_SPECIMEN	Maniltoa Scheff.	GENUS	ID	http://data.biodiversitydata.nl/naturalis/specimen/L.2053996	L.2053996	Maniltoa		Indonesia	1959	1959-06-10	near Bier-river, north of Sidoarsi mountains, 200 km West of Hollandia, Div. Hollandia.	Iwanggin GT					L	1959/06/10					ASIA	L.2053996	6	10																Plantae	Tracheophyta	Fabales	Fabaceae	Magnoliopsida	Botany	ICN	Plantae|Magnoliopsidae|Fabales|Leguminosae-Caes.
PRESERVED_SPECIMEN	Marlierea bipennis (O.Berg) McVaugh	SPECIES	BR	http://specimens.kew.org/herbarium/K000330542	K000330542	Marlierea	bipennis	Brazil			Rio Negro	Spruce, R.					K							K000330542				2008-07-09	3770													Plantae	Tracheophyta	Myrtales	Myrtaceae	Magnoliopsida	Herbarium		MYRTACEAE
PRESERVED_SPECIMEN	Marsea celebris S.Moore	SPECIES	none	b7df9cc0-11b4-429c-bbf1-7e7f2078327c	BM000903857	Conyza	celebris				Nearest Named Place: Locality Unknown	George Francis Scott-Elliot					BM		HOLOTYPE		H Beentje			4528905				2017-08-21	6907						NHMUK:ecatalogue:4528905							Plantae	Tracheophyta	Asterales	Asteraceae	Magnoliopsida	BOT		Asteraceae
PRESERVED_SPECIMEN	Marsilea quadrifolia L.	SPECIES	FR	http://coldb.mnhn.fr/catalognumber/mnhn/p/p00334327	P00334327	Marsilea	quadrifolia	France	1850	1850-06-01		Delaunay, J.					P			37 Indre-et-Loire				http://coldb.mnhn.fr/catalognumber/mnhn/p/p00334327	6			2015-09-03										Indre-et-Loire: entre le Cher et la levée de Rochepinard, canton de Tours				Plantae	Tracheophyta	Salviniales	Marsileaceae	Polypodiopsida	P
PRESERVED_SPECIMEN	Marsupella sullivantii (Denot) Evans	SPECIES	CZ	http://data.rbge.org.uk/herb/E00049917	E00049917	Marsupella	sullivantii	Czechia	1904	1904-09-17	Riesengebirge; auf feuchten Steinen in Gräben zwischen Wiesenbaudenund dem Hochwiesenberge	Schiffner, Victor F.					E	1904-09-17	ISOTYPE					http://data.rbge.org.uk/herb/E00049917	9	17		2011-03-21	352					1410 M	BGBASE:115113	http://biocol.org/urn:lsid:biocol.org:col:15670						Plantae	Marchantiophyta	Jungermanniales	Gymnomitriaceae	Jungermanniopsida	E	ICBN
PRESERVED_SPECIMEN	Mascagnia sepium Griseb.	SPECIES	BR	http://specimens.kew.org/herbarium/K001227551	K001227551	Mascagnia	sepium	Brazil				Graham					K							K001227551				2016-02-12	s.n.													Plantae	Tracheophyta	Malpighiales	Malpighiaceae	Magnoliopsida	Herbarium		MALPIGHIACEAE
PRESERVED_SPECIMEN	Matelea lourteigiae G.Morillo	SPECIES	BR	http://specimens.kew.org/herbarium/K000095866	K000095866	Matelea	lourteigiae	Brazil			Santarém.	s.coll.					K				Morillo, G.			K000095866				2015-02-03	888		Data not transcribed											Plantae	Tracheophyta	Gentianales	Apocynaceae	Magnoliopsida	Herbarium		APOCYNACEAE
PRESERVED_SPECIMEN	Matthiola elliptica R.Br. ex DC.	SPECIES	ET	d7c2e187-b87e-4187-b503-da7c638f0a7e	BM000583717	Diceratella	elliptica	Ethiopia	1810	1810-01-01		H Salt					BM		HOLOTYPE				AFRICA	4517700				2018-02-01	s.n.						NHMUK:ecatalogue:4517700							Plantae	Tracheophyta	Brassicales	Brassicaceae	Magnoliopsida	BOT		Brassicaceae
PRESERVED_SPECIMEN	Mayaca fluviatilis Aubl.	SPECIES	US	http://www.botanicalcollections.be/specimen/BR0000008967527	BR0000008967527	Mayaca	fluviatilis	United States	1959	1959-06-23	Plants of Florida - Santa Rosa County - In shallow stream flowing across state highway 191 about 2.5 miles northeast of Milton.	Dress W.J. & Read R.W.					BR							http://www.botanicalcollections.be/specimen/BR0000008967527	6	23		2008-01-11	7607								Meise Botanic Garden					Plantae	Tracheophyta	Poales	Mayacaceae	Liliopsida		ICBN
PRESERVED_SPECIMEN	Mecodium imbricatum (Bl.) Copel.	SPECIES	ID	http://data.biodiversitydata.nl/naturalis/specimen/L.3559598	L.3559598	Hymenophyllum	imbricatum	Indonesia			Java.	Korthals PW					L						ASIA	L.3559598																		Plantae	Tracheophyta	Hymenophyllales	Hymenophyllaceae	Polypodiopsida	Botany	ICN	Plantae|Pteropsida|Hymenophyllales|Hymenophyllaceae
PRESERVED_SPECIMEN	Meconopsis gracilipes G.Taylor	SPECIES	NP	cb635ab9-48e2-453c-b551-59ed3c387601	BM000547082	Meconopsis	gracilipes	Nepal	1976	1976-08-28		Rebecca G. Troth		28.253008	83.938548	WGS84	BM		HOLOTYPE				ASIA	4977812	8	28			947						NHMUK:ecatalogue:4977812							Plantae	Tracheophyta	Ranunculales	Papaveraceae	Magnoliopsida	BOT		Papaveraceae
PRESERVED_SPECIMEN	Medicago suffruticosa Ramond ex DC.	SPECIES	none	http://coldb.mnhn.fr/catalognumber/mnhn/p/p03064967	P03064967	Medicago	suffruticosa										P							http://coldb.mnhn.fr/catalognumber/mnhn/p/p03064967				2016-03-09														Plantae	Tracheophyta	Fabales	Fabaceae	Magnoliopsida	P
PRESERVED_SPECIMEN	Meehania urticifolia Makino	SPECIES	CN	http://data.rbge.org.uk/herb/E00275837	E00275837	Meehania	urticifolia	China	1898	1898-05-26	Environs du Kouy-yang. Mont. du Collège.	Bodinier, Emile Marie (Rev.)					E	1898-05-26	SYNTYPE	Guizhou Province				http://data.rbge.org.uk/herb/E00275837	5	26		2011-02-07	2284						BGBASE:313365	http://biocol.org/urn:lsid:biocol.org:col:15670						Plantae	Tracheophyta	Lamiales	Lamiaceae	Magnoliopsida	E	ICBN
PRESERVED_SPECIMEN	Megalastrum Holttum	GENUS	BR	http://specimens.kew.org/herbarium/K000957109	K000957109	Megalastrum		Brazil				Preston, T.A.					K				Viveros, R.S.			K000957109				2014-02-25	s.n.													Plantae	Tracheophyta	Polypodiales	Dryopteridaceae	Polypodiopsida	Herbarium		DRYOPTERIDACEAE
PRESERVED_SPECIMEN	Melaleuca diffusa G.Forst.	SPECIES	NZ	42e46f3a-c060-410e-955c-e7016eb77f53	BM001015407	Metrosideros	diffusa	New Zealand				Johann Georg Adam Forster					BM						OCEANIA	614609				2018-02-01	129						NHMUK:ecatalogue:614609							Plantae	Tracheophyta	Myrtales	Myrtaceae	Magnoliopsida	BOT		Myrtaceae
PRESERVED_SPECIMEN	Melampyrum arvense L.	SPECIES	EE	TU262789	TU262789	Melampyrum	arvense	Estonia	1890	1890-07-01	in Rocca al Mare (Reval) (=Tallinn)	R. Wiren					TU	1890-07			W.J. Reinthal	1932-03-11T00:00:00.000+0000		TU262789	7								Etiketil: Melampyrum arvense subsp. arvense Ronnig. - W. J. Reinthal				Natural History Museum, University of Tartu		4			Plantae	Tracheophyta	Lamiales	Orobanchaceae	Magnoliopsida	TU		Viridiplantae; Anthophyta; Eudicotyledonae; Lamiales; Orobanchaceae; Melampyrum
PRESERVED_SPECIMEN	Melicope belahe (Baill.) T.G.Hartley	SPECIES	none	http://coldb.mnhn.fr/catalognumber/mnhn/p/p04759127	P04759127	Melicope	belahe										P							http://coldb.mnhn.fr/catalognumber/mnhn/p/p04759127				2015-09-05														Plantae	Tracheophyta	Sapindales	Rutaceae	Magnoliopsida	P
PRESERVED_SPECIMEN	Melicytus dentatus (R.Br. ex DC.) Molloy & Mabb.	SPECIES	AU	http://www.botanicalcollections.be/specimen/BR0000013210359	BR0000013210359	Melicytus	dentatus	Australia			S.L.	Von Mueller F.					BR	S.D.						http://www.botanicalcollections.be/specimen/BR0000013210359				2014-01-27	S.N.								Meise Botanic Garden					Plantae	Tracheophyta	Malpighiales	Violaceae	Magnoliopsida		ICBN
PRESERVED_SPECIMEN	Melilotus altissimus Thuill.	SPECIES	NL	http://data.biodiversitydata.nl/naturalis/specimen/AMD.124313	AMD.124313	Melilotus	altissimus	Netherlands	1981	1981-08-31	Langs fietspad langs Nederijn te Rhenen.	Meer R van der; Heemskerk A; Houthuesen J					L	1981/08/31					EUROPE	AMD.124313	8	31																Plantae	Tracheophyta	Fabales	Fabaceae	Magnoliopsida	Botany	ICN	Plantae|Magnoliopsidae|Fabales|Leguminosae-Pap.
PRESERVED_SPECIMEN	Melittis melissophyllum L.	SPECIES	GB	http://specimens.kew.org/herbarium/K000790497	K000790497	Melittis	melissophyllum	United Kingdom	1888	1888-07-11	[between Totnes & Dartmouth]	Ley, A.		50.37	-3.66	WGS84	K							K000790497	7	11		2012-03-28	s.n.													Plantae	Tracheophyta	Lamiales	Lamiaceae	Magnoliopsida	Herbarium		LABIATAE
PRESERVED_SPECIMEN	Melochia umbellata (Houtt.) Stapf	SPECIES	ID	http://data.biodiversitydata.nl/naturalis/specimen/L.2373630	L.2373630	Melochia	umbellata	Indonesia			Jav. Naum-Toctocp Auve.	Unknown					L						ASIA	L.2373630																		Plantae	Tracheophyta	Malvales	Malvaceae	Magnoliopsida	Botany	ICN	Plantae|Magnoliopsidae|Malvales|Sterculiaceae
PRESERVED_SPECIMEN	Memecylon L.	GENUS	none	http://coldb.mnhn.fr/catalognumber/mnhn/p/p05224477	P05224477	Memecylon											P							http://coldb.mnhn.fr/catalognumber/mnhn/p/p05224477				2015-09-04														Plantae	Tracheophyta	Myrtales	Melastomataceae	Magnoliopsida	P
[truncated: 825 more rows]
[truncated: 70 more columns]
